# Supplementary material for: Bacterial chemolithoautotrophy via manganese oxidation
Source: Springer Nature journal article supplement (doi:10.1038/s41586-020-2468-5), 2020-07-15
Supplement: MOESM3 [file 41586_2020_2468_MOESM3_ESM.xlsx]

## Sheet: Sheet1
Supplementary Table 1. Community profiles of Mn-oxidising enrichments by iTag sequencing of 16S rRNA genes.
Full SILVA taxonomy assignments are shown for 3 different enrichments (Round 0 = initial enrichment, Round 2 = after two rounds of serial dilution to extinction, Round 4 = after four rounds of serial dilution to extinction). Only two species remain after 4 rounds of dilution to extinction series. This co-culture could not be further separated, yet still oxidises Mn(II).
Taxon	Round 0 Enrichment (#85)	Round 2 Enrichment (#83)	Round 4 Enrichment (#68)
Bacteria;__Nitrospirae;__Nitrospira;__Nitrospirales;__Nitrospiraceae;__Leptospirillum	0.564334	0.675413	0.692601
Bacteria;__Proteobacteria;__Betaproteobacteria;__Burkholderiales;__Comamonadaceae;Other	0.0795416	0.171974	0.29431
Bacteria;__Gemmatimonadetes;__Gemmatimonadetes;__Gemmatimonadales;__Gemmatimonadaceae;__uncultured	0.0465299	0.0517061	0
Unassigned;Other;Other;Other;Other;Other	0.053191	0.0255114	0.0103618
Bacteria;__Proteobacteria;__Alphaproteobacteria;__Sphingomonadales;__Sphingomonadaceae;__Sphingopyxis	0.000783661	0.0164002	0
Bacteria;__Proteobacteria;__Alphaproteobacteria;__Rhizobiales;__Xanthobacteraceae;__Pseudolabrys	0.000685703	0.0128468	0
Bacteria;__Proteobacteria;__Alphaproteobacteria;__Caulobacterales;__Caulobacteraceae;__Phenylobacterium	0.00871823	0.0121635	0
Bacteria;__Bacteroidetes;__Sphingobacteriia;__Sphingobacteriales;__Chitinophagaceae;__Hydrotalea	0.000195915	0.0098401	0
Bacteria;__Firmicutes;__Bacilli;__Bacillales;__Paenibacillaceae;__Paenibacillus	0.00039183	0.0064234	0
Bacteria;__Proteobacteria;__Alphaproteobacteria;__Rhizobiales;__Bradyrhizobiaceae;__Bradyrhizobium	0.00132243	0.00564895	4.54463e-05
Bacteria;__Proteobacteria;__Alphaproteobacteria;__Rhizobiales;__Xanthobacteraceae;Other	0.000293873	0.00246002	0
Bacteria;__Proteobacteria;__Alphaproteobacteria;__Rhizobiales;Other;Other	0.00337954	0.00141224	0
Bacteria;__Proteobacteria;__Betaproteobacteria;__Burkholderiales;__Comamonadaceae;__Ramlibacter	0.00195915	0.00136668	0.00190874
Bacteria;__Actinobacteria;__Thermoleophilia;__Gaiellales;__uncultured;__g	0.000146936	0.000820008	0
Bacteria;Other;Other;Other;Other;Other	0.00313464	0.000410004	0
Bacteria;__Proteobacteria;__Alphaproteobacteria;Other;Other;Other	0.00244894	0.000318892	0
Bacteria;__Proteobacteria;__Betaproteobacteria;__Burkholderiales;__Comamonadaceae;__uncultured	0.000195915	0.000182224	0.000181785
Bacteria;__Proteobacteria;__Betaproteobacteria;__Rhodocyclales;__Rhodocyclaceae;__Thauera	4.89788e-05	0.000182224	0
Bacteria;__Bacteroidetes;__Cytophagia;__Cytophagales;__Cytophagaceae;__uncultured	0.0596562	9.1112e-05	0
Bacteria;__Proteobacteria;__Betaproteobacteria;__TRA3_20;__f;__g	0.0238037	9.1112e-05	0
Bacteria;__Proteobacteria;__Alphaproteobacteria;__Rhizobiales;__Bradyrhizobiaceae;Other	9.79576e-05	4.5556e-05	0
Bacteria;__Proteobacteria;__Alphaproteobacteria;__Rhodospirillales;Other;Other	0.0519175	0	0
Bacteria;__Proteobacteria;__Alphaproteobacteria;__Rhodospirillales;__Acetobacteraceae;__uncultured	0.013861	0	0
Bacteria;__Acidobacteria;__Acidobacteria;__Subgroup_6;__f;__g	0.0131753	0	0
Bacteria;__Cyanobacteria;__ML635J_21;__o;__f;__g	0.0121957	0	0
Bacteria;__Chloroflexi;__KD4_96;__o;__f;__g	0.00955086	0	0
Bacteria;__Proteobacteria;__Alphaproteobacteria;__Rhizobiales;__Methylobacteriaceae;__uncultured	0.00783661	0	0
Bacteria;__Nitrospirae;__Nitrospira;__Nitrospirales;__Nitrospiraceae;__Nitrospira	0.00631826	0	0
Bacteria;__Actinobacteria;__Actinobacteria;__Micromonosporales;__Micromonosporaceae;Other	0.00622031	0	0
Bacteria;__Proteobacteria;__Alphaproteobacteria;__Rhodospirillales;__I_10;__g	0.00548562	0	0
Bacteria;__Cyanobacteria;__Melainabacteria;__Obscuribacterales;__f;__g	0.00357545	0	0
Bacteria;__Proteobacteria;__Betaproteobacteria;Other;Other;Other	0.0025469	0	0
Bacteria;__Chloroflexi;__Thermomicrobia;__JG30_KF_CM45;__f;__g	0.00191017	0	0
Bacteria;__Proteobacteria;__Alphaproteobacteria;__Rhodobacterales;__Rhodobacteraceae;Other	0.00176324	0	0
Bacteria;__Proteobacteria;__Betaproteobacteria;__Burkholderiales;__Burkholderiaceae;__Limnobacter	0.00137141	0	0
Bacteria;__Proteobacteria;__Alphaproteobacteria;__Rhizobiales;__Rhizobiaceae;__Ensifer	0.00122447	0	0
Bacteria;__Proteobacteria;__Betaproteobacteria;__Rhodocyclales;__Rhodocyclaceae;__Methyloversatilis	0.00117549	0	0
Bacteria;__Actinobacteria;__Actinobacteria;__Propionibacteriales;__Nocardioidaceae;__Nocardioides	0.000930597	0	0.000136339
Bacteria;__Proteobacteria;__Betaproteobacteria;__Rhodocyclales;__Rhodocyclaceae;Other	0.000832639	0	0
Bacteria;__Proteobacteria;__Gammaproteobacteria;__Xanthomonadales;__Xanthomonadaceae;__Lysobacter	0.000734682	0	0
Bacteria;__Nitrospirae;__Nitrospira;__Nitrospirales;__Nitrospiraceae;Other	0.000636724	0	0
Bacteria;__Actinobacteria;__Actinobacteria;Other;Other;Other	0.000538767	0	0
Bacteria;__Armatimonadetes;__c;__o;__f;__g	0.000538767	0	0
Bacteria;__Bacteroidetes;__Sphingobacteriia;__Sphingobacteriales;__Chitinophagaceae;__Sediminibacterium	0.00039183	0	0
Bacteria;__Acidobacteria;__Acidobacteria;__Subgroup_3;__Unknown_Family;__Bryobacter	0.00039183	0	0
Bacteria;__Proteobacteria;__Betaproteobacteria;__Nitrosomonadales;__Nitrosomonadaceae;__uncultured	0.000342852	0	0
Bacteria;__Proteobacteria;__Alphaproteobacteria;__Rhizobiales;__Hyphomicrobiaceae;__Pedomicrobium	0.000342852	0	0
Bacteria;__Acidobacteria;__Acidobacteria;__Subgroup_4;__11_24;__g	0.000342852	0	0
Bacteria;__Proteobacteria;__Alphaproteobacteria;__Rhizobiales;__Hyphomicrobiaceae;__Hyphomicrobium	0.000195915	0	0
Bacteria;__Firmicutes;__Bacilli;__Bacillales;__Bacillaceae;__Bacillus	0.000195915	0	0
Bacteria;__Bacteroidetes;__Sphingobacteriia;__Sphingobacteriales;__NS11_12_marine_group;__g	0.000195915	0	0
Bacteria;__Acidobacteria;__Acidobacteria;__Subgroup_3;__Unknown_Family;Other	0.000195915	0	0
Bacteria;__Chloroflexi;__Elev_1554;__o;__f;__g	0.000195915	0	0
Bacteria;__Proteobacteria;__Alphaproteobacteria;__Rhizobiales;__Phyllobacteriaceae;Other	0.000146936	0	0
Bacteria;__Proteobacteria;__Betaproteobacteria;__Nitrosomonadales;__Nitrosomonadaceae;__Nitrosomonas	0.000146936	0	0
Bacteria;__Firmicutes;__Bacilli;Other;Other;Other	0.000146936	0	0
Bacteria;__Actinobacteria;__Actinobacteria;__Micromonosporales;__Micromonosporaceae;__Salinispora	0.000146936	0	0
Bacteria;__Cyanobacteria;__Melainabacteria;Other;Other;Other	0.000146936	0	0
Bacteria;__Proteobacteria;__Alphaproteobacteria;__Caulobacterales;__Caulobacteraceae;Other	9.79576e-05	0	0
Bacteria;__Proteobacteria;__Alphaproteobacteria;__Rhodospirillales;__Rhodospirillaceae;__Defluviicoccus	9.79576e-05	0	0
Bacteria;__Planctomycetes;__Planctomycetacia;__Planctomycetales;__Planctomycetaceae;__Planctomyces	9.79576e-05	0	0
Bacteria;__Proteobacteria;Other;Other;Other;Other	9.79576e-05	0	0
Bacteria;__Proteobacteria;__Alphaproteobacteria;__Rhizobiales;__Bradyrhizobiaceae;__uncultured	9.79576e-05	0	0
Bacteria;__Proteobacteria;__Betaproteobacteria;__Burkholderiales;__Comamonadaceae;__Pseudorhodoferax	9.79576e-05	0	0
Bacteria;__Actinobacteria;__Actinobacteria;__Micromonosporales;__Micromonosporaceae;__Luedemannella	9.79576e-05	0	0
Bacteria;__Proteobacteria;__Betaproteobacteria;__Rhodocyclales;__Rhodocyclaceae;__Denitratisoma	9.79576e-05	0	0
Bacteria;__Proteobacteria;__Alphaproteobacteria;__Rhizobiales;__Hyphomicrobiaceae;Other	4.89788e-05	0	0
Bacteria;__Proteobacteria;__Alphaproteobacteria;__Rhodobacterales;__Rhodobacteraceae;__uncultured	4.89788e-05	0	0
Bacteria;__Proteobacteria;__Alphaproteobacteria;__Rhodospirillales;__Rhodospirillaceae;__uncultured	4.89788e-05	0	0
Bacteria;__Proteobacteria;__Alphaproteobacteria;__Rhodospirillales;__Rhodospirillales_Incertae_Sedis;__Reyranella	4.89788e-05	0	0
Bacteria;__Proteobacteria;__Alphaproteobacteria;__Sphingomonadales;Other;Other	4.89788e-05	0	0
Bacteria;__Proteobacteria;__Betaproteobacteria;__Burkholderiales;Other;Other	4.89788e-05	0	0
