# Supplementary material for: Bacterial chemolithoautotrophy via manganese oxidation
Source: Springer Nature journal article supplement (doi:10.1038/s41586-020-2468-5), 2020-07-15
Supplement: MOESM4 [file 41586_2020_2468_MOESM4_ESM.xlsx]

## Sheet: NLT_16S_id_matrix.renamed
Supplementary Table 2 | Percent identity matrix of representative 16S rRNA gene sequences in the phylum Nitrospirae.
Text are colored based on their classes according to Fig. 3. The order of the species is the same as the Bayesian phylogenetic tree in Extended Data Fig. 5a.
	Baikal-G1 NSIK01000026 (Freshwater; Russia)	Nitrospira japonica LT828648	Candidatus Nitrospira nitrosa CZQA01000015	Nitrospira moscoviensis X82558	Candidatus Nitrospira inopinata LN885086	Nitrospira lenta OUNR01000021	OLB3 JZQY01000029 (Wastewater; Netherlands)	Candidatus Nitrospira defluvii FP929003	RIFCSPLOWO2_02_FULL_62_14 MHEU01000023 (Groundwater; Colorado USA)	Nitrospira marina Nb-295 X82559	bin75 MPMZ01000040 (Sponge Aplysina aerophoba)	EU491238 (Seafloor lava; Loi'hi Seamount)	HM187191 (Subsurface sediment; Hanford Site USA)	KX163469 (Basaltic subsurface groundwater; Iceland)	AJ863252 (Flooded bulk soil; Germany)	Leptospirillum ferriphilum ML-04 CP002919	Leptospirillum sp. Group II C75 JH660558	Leptospirillum ferriphilum AF356829	Leptospirillum ferrooxidans X86776	Leptospirillum ferrooxidans C2-3 AP012342	DQ328622 (Acid mine drainage sediment; China)	FJ228338 (Acidic mine pit lake sediment; Germany)	HM187081 (Subsurface sediment; Hanford Site USA)	EU491443 (Seafloor lava; Hawai'i South Point)	RIFCSPHIGHO2_01_FULL_66_17 MHEO01000007 (Groundwater; Colorado USA)	KX163767 (Basaltic subsurface groundwater; Iceland)	FJ712431 (Kazan Mud Volcano; East Mediterranean Sea)	KM071656 (Deep-sea hydrothermal vent sediment; East Pacific Ocean)	Species A (Laboratory enrichment; Caltech)	DQ058677 (Drinking water distribution system; Denmark)	HQ697399 (Biologically activated carbon for drinking water treatment; China)	HM187074 (Subsurface sediment; Hanford Site USA)	EU491114 (Seafloor lava; Loi'hi Seamount)	AY734241 (Spring water of alpine karst aquifer; Austria)	KF836147 (Deep fractured rock aquifer; Mojave Desert)	Candidatus Troglogloea absoloni JQ867302 (Vjetrenica cave; Dinaric Karst)	KC358006 (Large-discharge carbonate springs; Mojave Desert)	AY734239 (Spring water of alpine karst aquifer; Austria)	GQ342365 (Heavy metal and uranium contaminated soil; Germany)	GWA2_42_11 MHDS00000000 (Groundwater; Colorado USA)	GWF2_44_13 MHEE01000002 (Groundwater; Colorado USA)	CG02_land_8_20_14_3_00_44_33 PEUC00000000 (Groundwater; Utah USA)	CG02_land_8_20_14_3_00_41_53 PEUB01000110 (Groundwater; Utah USA)	fen_1311 PMKJ00000000 (Permafrost soil; Sweden)	MYbin3 PEAD01000007 (Freshwater sediment; China)	SZUA-242 QJVM01000188 (Hydrothermal sediment; Atlantic Ocean)	EU491299 (Seafloor lava; Loi'hi Seamount)	HCH-1 LNQR01000045 (Freshwater sediment; China)	Candidatus Magnetobacterium casensis JMFO01000010
Baikal-G1 NSIK01000026 (Freshwater; Russia)	100	96.1	96.5	96.1	96.2	95.7	93.4	92.7	93.3	88.5	89	83.1	83	83	84	80.1	80.1	79.7	78.8	79.3	80.4	80.1	81.2	81.8	83	82.4	81.4	81.4	83.5	83.2	83	82.3	81.5	80.8	80.6	81	80.9	82.3	82.5	79	79.4	78.3	79.4	77.6	79.9	80.3	78.8	79.1	79.3
Nitrospira japonica LT828648	96.1	100	96.8	96	96.3	96.2	93.3	92.7	93.3	88.4	88.6	82.7	82.7	82.6	84.1	81.2	81.2	80.8	79.4	80	80.6	80.2	82.1	82.5	82.7	81.9	81.3	81.8	83.5	83.1	83.1	82.2	81.4	79.8	80.1	81	81.4	82	82.4	79.3	80	78.8	79.6	78.1	80.4	80.3	78.9	79	80.1
Candidatus Nitrospira nitrosa CZQA01000015	96.5	96.8	100	97.2	97.4	96.3	93.9	93.7	93.9	88.5	88.8	82.3	82.4	82.9	84.7	81.1	81.1	80.8	79.3	79.9	80.6	79.9	81.7	82.6	82.9	82.1	81.8	82	83.3	83	82.9	82.2	81.4	80.4	80.1	81.7	82.2	82.6	82.7	79.2	79.5	78.8	79.6	77.9	79.9	80.3	79.1	78.9	79.7
Nitrospira moscoviensis X82558	96.1	96	97.2	100	97.8	96.5	94.5	94.1	93.9	88.8	89.2	82.7	83.3	83.3	84.5	81.3	81.3	80.9	79.5	80.1	80.8	80.3	81.8	82.7	83.7	82.9	82	82	83.6	83.2	83.2	82.7	81.4	80.7	80.6	81.8	81.9	82.8	83.1	79.6	79.6	78.8	79.8	77.9	80.4	80.5	79.1	79.1	79.9
Candidatus Nitrospira inopinata LN885086	96.2	96.3	97.4	97.8	100	96.6	94	93.6	93.9	89.3	89.8	83.3	83.4	83.2	84.6	81.5	81.5	81.1	79.6	80.1	80.7	80.2	82.2	82.7	84	83.2	82.4	82.4	83.6	83.5	83	82.8	81.5	81.1	80.6	81.5	82.1	83.1	83.5	79.6	79.6	78.7	79.6	77.8	80.1	80.9	79.4	79.1	80.3
Nitrospira lenta OUNR01000021	95.7	96.2	96.3	96.5	96.6	100	94.1	93.7	93.7	89	89.1	82.4	82.9	82.5	84.6	80.6	80.6	80.2	79.4	80.1	80.5	80.3	81.8	81.6	83	82.2	82	81.7	83.6	83.3	83.2	82.2	81.4	80.1	80.4	81.5	80.8	81.7	82.5	79.3	80.1	78.4	79.9	77.4	80	80.2	78.8	79.6	79.9
OLB3 JZQY01000029 (Wastewater; Netherlands)	93.4	93.3	93.9	94.5	94	94.1	100	97.8	93.1	88.5	89.4	82.2	82.9	83	84.6	81.5	81.5	81.1	79.7	80.3	81	81.1	82	82	83.3	82.4	81.4	81.8	83.2	82.8	82.7	82.3	81.1	80.4	80.8	80.8	79.9	81	82.7	79.9	78.7	77.5	78.5	77.1	79.3	79.9	77.9	78.5	80.1
Candidatus Nitrospira defluvii FP929003	92.7	92.7	93.7	94.1	93.6	93.7	97.8	100	93.6	88.2	89.2	82.3	82.8	82.6	84.4	81.8	81.8	81.6	80.2	81	81.7	81.4	82.6	82.1	82.9	81.8	81.6	81.7	83.4	83.1	83.1	82.5	81.2	80.2	80.6	80.7	79.9	81	83	79.6	79.2	77.9	79	77.8	79.4	79.9	78.3	78.9	80.4
RIFCSPLOWO2_02_FULL_62_14 MHEU01000023 (Groundwater; Colorado USA)	93.3	93.3	93.9	93.9	93.9	93.7	93.1	93.6	100	89.9	90.7	82.9	83.4	83.8	86.2	81.3	81.3	81.1	80	80.6	81.2	80.7	83.3	82.7	84.1	83.1	82	82.3	84.4	84.1	84	83.4	81.8	81	81.4	81.9	81.3	82.6	82.9	79.3	80.5	80.1	80.6	78.5	80.1	81.1	79.6	80.4	80.7
Nitrospira marina Nb-295 X82559	88.5	88.4	88.5	88.8	89.3	89	88.5	88.2	89.9	100	92.3	83.9	83.8	85	86	81.9	81.9	81.7	80.4	80.9	81.3	80.8	84.4	84.1	84.9	84.4	83.6	83.7	83.8	83.7	83.6	83.8	83.6	80.9	82.5	81.9	81	82.5	84	79	80.9	79.7	81.5	77.2	80.2	80.4	79.8	81.4	81
bin75 MPMZ01000040 (Sponge Aplysina aerophoba)	89	88.6	88.8	89.2	89.8	89.1	89.4	89.2	90.7	92.3	100	83.3	83.7	84.3	84.8	81.6	81.6	81.3	80.2	81	81.8	81.2	83.9	83.6	84.5	83.5	82.8	82.4	83.6	83.5	83.1	83.1	83.3	81.8	82.1	81.4	80.2	81.8	83.7	78.5	80.2	78.8	80.6	78	80.2	80.8	79.5	80	80.8
EU491238 (Seafloor lava; Loi'hi Seamount)	83.1	82.7	82.3	82.7	83.3	82.4	82.2	82.3	82.9	83.9	83.3	100	89.6	87.4	84.4	81.4	81.3	81.4	79.8	80.1	82.6	81.1	83.6	83.9	83.7	83.8	84.5	83.6	83.6	83.6	83.2	83.2	82.6	81.6	82.4	81.8	81.3	82.5	83.2	79.2	80.2	78.3	79.6	78.4	80.1	80.6	79.2	80.2	80.8
HM187191 (Subsurface sediment; Hanford Site USA)	83	82.7	82.4	83.3	83.4	82.9	82.9	82.8	83.4	83.8	83.7	89.6	100	89.3	86.6	82.5	82.4	82.4	80.9	80.8	83	82.1	85.4	84.4	83.6	83.8	84.6	85.3	84	84	83.5	83.3	81.3	81.1	81.4	81.9	81.7	83.1	84.7	81	80.8	80.3	80.2	80.4	80.5	80.3	78.9	81.1	81.2
KX163469 (Basaltic subsurface groundwater; Iceland)	83	82.6	82.9	83.3	83.2	82.5	83	82.6	83.8	85	84.3	87.4	89.3	100	87.6	82.1	82.1	82.1	80.5	80.8	82.6	81.2	86.7	85.7	85.3	85.3	83.8	85.2	85	85	85	85	83.5	82.4	83.8	83.8	81.6	83.8	84.7	79.7	80.9	80.1	80.8	78.7	80.1	81.2	79.5	81.8	81.8
AJ863252 (Flooded bulk soil; Germany)	84	84.1	84.7	84.5	84.6	84.6	84.6	84.4	86.2	86	84.8	84.4	86.6	87.6	100	82.9	82.8	82.9	82	82.2	83.1	82.3	88.4	86.9	86.7	86.7	84.5	86	87	86.7	86.6	86.4	84.5	83.4	84.7	84.3	83.1	84.1	85.6	81	81.4	80.9	80.9	79.7	81.3	80.4	79.5	81.3	81.9
Leptospirillum ferriphilum ML-04 CP002919	80.1	81.2	81.1	81.3	81.5	80.6	81.5	81.8	81.3	81.9	81.6	81.4	82.5	82.1	82.9	100	99.9	99.7	93.4	93.7	91.6	91	83.2	84.2	84.3	83.8	82	83.3	83.5	83.1	83.3	82.4	81.8	80.3	80.8	80.6	81	81.2	83.7	80.7	81.2	80.1	80.6	79.4	81.1	81.6	80.2	81.3	81.3
Leptospirillum sp. Group II C75 JH660558	80.1	81.2	81.1	81.3	81.5	80.6	81.5	81.8	81.3	81.9	81.6	81.3	82.4	82.1	82.8	99.9	100	99.6	93.3	93.6	91.5	90.9	83.1	84.1	84.2	83.8	82	83.3	83.5	83	83.2	82.3	81.8	80.3	80.8	80.5	81	81.1	83.7	80.6	81.2	80.1	80.6	79.4	81.1	81.6	80.2	81.3	81.3
Leptospirillum ferriphilum AF356829	79.7	80.8	80.8	80.9	81.1	80.2	81.1	81.6	81.1	81.7	81.3	81.4	82.4	82.1	82.9	99.7	99.6	100	93.5	93.5	91.4	90.7	83.3	84.1	84	83.8	81.6	83.1	83.3	83	83.2	82.5	81.8	80.3	80.9	80.6	81	81.3	83.7	80.6	80.9	79.9	80.3	79.3	80.9	81.4	80.1	81	81
Leptospirillum ferrooxidans X86776	78.8	79.4	79.3	79.5	79.6	79.4	79.7	80.2	80	80.4	80.2	79.8	80.9	80.5	82	93.4	93.3	93.5	100	99	89.7	88.8	81.3	82	81.9	81.6	79.6	81.7	80.9	80.5	80.7	80.5	80	79.2	79.3	79.1	78.9	79.4	82.6	80.5	79.5	79.6	79.1	80	80	80	78.3	80.2	80.2
Leptospirillum ferrooxidans C2-3 AP012342	79.3	80	79.9	80.1	80.1	80.1	80.3	81	80.6	80.9	81	80.1	80.8	80.8	82.2	93.7	93.6	93.5	99	100	90.2	89.3	81.6	82.7	82.6	81.7	80.3	82.2	81.8	81.3	81.5	80.8	80.7	79.2	79.7	79.2	78.7	79.4	82.7	81.2	80.1	79.9	79.9	80.1	80.6	80.5	78.7	80.9	80.8
DQ328622 (Acid mine drainage sediment; China)	80.4	80.6	80.6	80.8	80.7	80.5	81	81.7	81.2	81.3	81.8	82.6	83	82.6	83.1	91.6	91.5	91.4	89.7	90.2	100	95.9	83.1	84.1	84.1	83.5	81.5	82.5	83	82.6	82.7	82	81.6	80.9	80.5	81.7	80.9	81.3	83.2	81	82.1	80.9	81	80.1	81.4	81.9	81	82.8	82.3
FJ228338 (Acidic mine pit lake sediment; Germany)	80.1	80.2	79.9	80.3	80.2	80.3	81.1	81.4	80.7	80.8	81.2	81.1	82.1	81.2	82.3	91	90.9	90.7	88.8	89.3	95.9	100	82	83	82.7	82.5	80.8	81.3	82	81.7	81.8	81.2	80.9	80	79.7	80.2	79.4	80.2	82.4	80.2	81.5	81.2	80.7	80	80.7	80.9	79.9	81.8	81.1
HM187081 (Subsurface sediment; Hanford Site USA)	81.2	82.1	81.7	81.8	82.2	81.8	82	82.6	83.3	84.4	83.9	83.6	85.4	86.7	88.4	83.2	83.1	83.3	81.3	81.6	83.1	82	100	93.1	86.3	86.3	83.9	87	86.3	86.1	86.2	85.8	84.6	83.2	84.1	84.4	82.5	84.7	86.5	81.5	80.3	79.9	80.6	78.9	80.1	80.7	80.8	79.9	81.2
EU491443 (Seafloor lava; Hawai'i South Point)	81.8	82.5	82.6	82.7	82.7	81.6	82	82.1	82.7	84.1	83.6	83.9	84.4	85.7	86.9	84.2	84.1	84.1	82	82.7	84.1	83	93.1	100	86.3	86.1	84.5	87.2	86	85.8	85.7	85.5	84.9	82.9	84.1	83.9	81.7	83.7	85.7	81.9	81.2	80.6	81.5	79.2	80.6	81.5	80.9	80.6	81.8
RIFCSPHIGHO2_01_FULL_66_17 MHEO01000007 (Groundwater; Colorado USA)	83	82.7	82.9	83.7	84	83	83.3	82.9	84.1	84.9	84.5	83.7	83.6	85.3	86.7	84.3	84.2	84	81.9	82.6	84.1	82.7	86.3	86.3	100	98.6	85.7	86.8	87	86.8	86.4	86.3	85.4	83.7	85.2	84.9	83.5	85.9	86.9	84.6	82.1	79.9	82	79.2	82.1	82.8	80.8	81.1	82.3
KX163767 (Basaltic subsurface groundwater; Iceland)	82.4	81.9	82.1	82.9	83.2	82.2	82.4	81.8	83.1	84.4	83.5	83.8	83.8	85.3	86.7	83.8	83.8	83.8	81.6	81.7	83.5	82.5	86.3	86.1	98.6	100	85.6	86	86.6	86.5	85.9	86.2	85.6	83.7	85	85.1	84.1	86.2	87.4	83.1	80.9	78.8	81	77.6	81.1	82.3	80.1	80.2	81.2
FJ712431 (Kazan Mud Volcano; East Mediterranean Sea)	81.4	81.3	81.8	82	82.4	82	81.4	81.6	82	83.6	82.8	84.5	84.6	83.8	84.5	82	82	81.6	79.6	80.3	81.5	80.8	83.9	84.5	85.7	85.6	100	85.6	84.4	84.2	84	84.3	83.6	82.3	84.7	82.5	82.9	83.3	85.9	83.1	81.3	80	80.6	78.4	80.4	80.8	79.7	81.1	80.9
KM071656 (Deep-sea hydrothermal vent sediment; East Pacific Ocean)	81.4	81.8	82	82	82.4	81.7	81.8	81.7	82.3	83.7	82.4	83.6	85.3	85.2	86	83.3	83.3	83.1	81.7	82.2	82.5	81.3	87	87.2	86.8	86	85.6	100	85	84.8	84.8	84.4	83.4	82.5	83.7	81.7	82.4	82.5	86.2	82.3	81.9	81.1	79.8	81.2	81.6	80.9	80.4	81.5	81.3
Species A (Laboratory enrichment; Caltech)	83.5	83.5	83.3	83.6	83.6	83.6	83.2	83.4	84.4	83.8	83.6	83.6	84	85	87	83.5	83.5	83.3	80.9	81.8	83	82	86.3	86	87	86.6	84.4	85	100	99.5	99.1	97.3	93.4	90.7	90.7	89.7	88.2	91	88.6	82.8	81.3	79.1	81.3	78.7	81.3	82	80	80.8	81.4
DQ058677 (Drinking water distribution system; Denmark)	83.2	83.1	83	83.2	83.5	83.3	82.8	83.1	84.1	83.7	83.5	83.6	84	85	86.7	83.1	83	83	80.5	81.3	82.6	81.7	86.1	85.8	86.8	86.5	84.2	84.8	99.5	100	98.6	97.3	93.4	90.6	90.6	89.6	88.1	91	88.4	82.3	80.9	78.5	80.8	78.1	80.9	81.7	79.7	80.5	81.2
HQ697399 (Drinking water treatment system; China)	83	83.1	82.9	83.2	83	83.2	82.7	83.1	84	83.6	83.1	83.2	83.5	85	86.6	83.3	83.2	83.2	80.7	81.5	82.7	81.8	86.2	85.7	86.4	85.9	84	84.8	99.1	98.6	100	97.5	93.3	90.6	90.6	89.6	88	90.8	88	82.4	81.5	79.3	81.3	78.6	80.9	81.6	79.8	80.8	81.1
HM187074 (Subsurface sediment; Hanford Site USA)	82.3	82.2	82.2	82.7	82.8	82.2	82.3	82.5	83.4	83.8	83.1	83.2	83.3	85	86.4	82.4	82.3	82.5	80.5	80.8	82	81.2	85.8	85.5	86.3	86.2	84.3	84.4	97.3	97.3	97.5	100	94.2	90.5	91.7	89.6	88.7	91.3	88.3	82	81.5	79.3	81.3	78.7	81.7	81.7	79.8	80.6	81.2
EU491114 (Seafloor lava; Loi'hi Seamount)	81.5	81.4	81.4	81.4	81.5	81.4	81.1	81.2	81.8	83.6	83.3	82.6	81.3	83.5	84.5	81.8	81.8	81.8	80	80.7	81.6	80.9	84.6	84.9	85.4	85.6	83.6	83.4	93.4	93.4	93.3	94.2	100	89.9	89.2	88.9	88	89.7	86.6	80.8	80.3	77.4	80.4	77.4	80.9	81	80.1	80.2	80.5
AY734241 (Alpine karst aquifer; Austria)	80.8	79.8	80.4	80.7	81.1	80.1	80.4	80.2	81	80.9	81.8	81.6	81.1	82.4	83.4	80.3	80.3	80.3	79.2	79.2	80.9	80	83.2	82.9	83.7	83.7	82.3	82.5	90.7	90.6	90.6	90.5	89.9	100	89.2	89	88.1	88.8	85.3	79.7	78.4	76.9	79.5	77.4	79.5	80.8	78.7	79.8	80.3
KF836147 (Deep fractured rock aquifer; Mojave Desert USA)	80.6	80.1	80.1	80.6	80.6	80.4	80.8	80.6	81.4	82.5	82.1	82.4	81.4	83.8	84.7	80.8	80.8	80.9	79.3	79.7	80.5	79.7	84.1	84.1	85.2	85	84.7	83.7	90.7	90.6	90.6	91.7	89.2	89.2	100	88	86.9	88.3	85.7	80.9	79.1	78	78.9	78.4	79.3	79.6	78.1	79.9	79.5
Candidatus Troglogloea absoloni JQ867302 (Vjetrenica cave; Dinaric Karst)	81	81	81.7	81.8	81.5	81.5	80.8	80.7	81.9	81.9	81.4	81.8	81.9	83.8	84.3	80.6	80.5	80.6	79.1	79.2	81.7	80.2	84.4	83.9	84.9	85.1	82.5	81.7	89.7	89.6	89.6	89.6	88.9	89	88	100	91.8	94.4	85.6	81.1	79.6	78.3	80.3	78.4	80.5	80.6	79	79.7	80.7
KC358006 (Large-discharge carbonate springs; Mojave Desert)	80.9	81.4	82.2	81.9	82.1	80.8	79.9	79.9	81.3	81	80.2	81.3	81.7	81.6	83.1	81	81	81	78.9	78.7	80.9	79.4	82.5	81.7	83.5	84.1	82.9	82.4	88.2	88.1	88	88.7	88	88.1	86.9	91.8	100	93	84.9	78.4	78.3	76.9	79	77	79.5	80	78.4	78.6	78.8
AY734239 (Spring water of alpine karst aquifer; Austria)	82.3	82	82.6	82.8	83.1	81.7	81	81	82.6	82.5	81.8	82.5	83.1	83.8	84.1	81.2	81.1	81.3	79.4	79.4	81.3	80.2	84.7	83.7	85.9	86.2	83.3	82.5	91	91	90.8	91.3	89.7	88.8	88.3	94.4	93	100	86.6	80.9	79.3	77.9	79.8	77.5	80.2	81	79.3	79.1	79.7
GQ342365 (Heavy metal and uranium contaminated soil; Germany)	82.5	82.4	82.7	83.1	83.5	82.5	82.7	83	82.9	84	83.7	83.2	84.7	84.7	85.6	83.7	83.7	83.7	82.6	82.7	83.2	82.4	86.5	85.7	86.9	87.4	85.9	86.2	88.6	88.4	88	88.3	86.6	85.3	85.7	85.6	84.9	86.6	100	83	81	79.4	81	78.4	81.3	81	80.3	81	82.5
GWA2_42_11 MHDS00000000 (Groundwater; Colorado USA)	79	79.3	79.2	79.6	79.6	79.3	79.9	79.6	79.3	79	78.5	79.2	81	79.7	81	80.7	80.6	80.6	80.5	81.2	81	80.2	81.5	81.9	84.6	83.1	83.1	82.3	82.8	82.3	82.4	82	80.8	79.7	80.9	81.1	78.4	80.9	83	100	82.2	81.4	81.2	80.5	80.2	80	77.4	79.6	81.1
GWF2_44_13 MHEE01000002 (Groundwater; Colorado USA)	79.4	80	79.5	79.6	79.6	80.1	78.7	79.2	80.5	80.9	80.2	80.2	80.8	80.9	81.4	81.2	81.2	80.9	79.5	80.1	82.1	81.5	80.3	81.2	82.1	80.9	81.3	81.9	81.3	80.9	81.5	81.5	80.3	78.4	79.1	79.6	78.3	79.3	81	82.2	100	97.5	92.9	90	89.5	86.8	86.4	88.1	89
CG02_land_8_20_14_3_00_44_33 PEUC00000000 (Groundwater; Utah USA)	78.3	78.8	78.8	78.8	78.7	78.4	77.5	77.9	80.1	79.7	78.8	78.3	80.3	80.1	80.9	80.1	80.1	79.9	79.6	79.9	80.9	81.2	79.9	80.6	79.9	78.8	80	81.1	79.1	78.5	79.3	79.3	77.4	76.9	78	78.3	76.9	77.9	79.4	81.4	97.5	100	92.6	89.3	88.5	85.1	84.7	88.2	88.4
CG02_land_8_20_14_3_00_41_53 PEUB01000110 (Groundwater; Utah USA)	79.4	79.6	79.6	79.8	79.6	79.9	78.5	79	80.6	81.5	80.6	79.6	80.2	80.8	80.9	80.6	80.6	80.3	79.1	79.9	81	80.7	80.6	81.5	82	81	80.6	79.8	81.3	80.8	81.3	81.3	80.4	79.5	78.9	80.3	79	79.8	81	81.2	92.9	92.6	100	89.1	89.8	86.3	86.4	87.5	88.2
fen_1311 PMKJ00000000 (Permafrost soil; Sweden)	77.6	78.1	77.9	77.9	77.8	77.4	77.1	77.8	78.5	77.2	78	78.4	80.4	78.7	79.7	79.4	79.4	79.3	80	80.1	80.1	80	78.9	79.2	79.2	77.6	78.4	81.2	78.7	78.1	78.6	78.7	77.4	77.4	78.4	78.4	77	77.5	78.4	80.5	90	89.3	89.1	100	90.1	84.3	84.3	85.4	85.7
MYbin3 PEAD01000007 (Freshwater sediment; China)	79.9	80.4	79.9	80.4	80.1	80	79.3	79.4	80.1	80.2	80.2	80.1	80.5	80.1	81.3	81.1	81.1	80.9	80	80.6	81.4	80.7	80.1	80.6	82.1	81.1	80.4	81.6	81.3	80.9	80.9	81.7	80.9	79.5	79.3	80.5	79.5	80.2	81.3	80.2	89.5	88.5	89.8	90.1	100	87.5	86.7	86.8	87.2
SZUA-242 QJVM01000188 (Hydrothermal sediment; Atlantic Ocean)	80.3	80.3	80.3	80.5	80.9	80.2	79.9	79.9	81.1	80.4	80.8	80.6	80.3	81.2	80.4	81.6	81.6	81.4	80	80.5	81.9	80.9	80.7	81.5	82.8	82.3	80.8	80.9	82	81.7	81.6	81.7	81	80.8	79.6	80.6	80	81	81	80	86.8	85.1	86.3	84.3	87.5	100	90.8	86	86
EU491299 (Seafloor lava; Loi'hi Seamount)	78.8	78.9	79.1	79.1	79.4	78.8	77.9	78.3	79.6	79.8	79.5	79.2	78.9	79.5	79.5	80.2	80.2	80.1	78.3	78.7	81	79.9	80.8	80.9	80.8	80.1	79.7	80.4	80	79.7	79.8	79.8	80.1	78.7	78.1	79	78.4	79.3	80.3	77.4	86.4	84.7	86.4	84.3	86.7	90.8	100	85.9	85.8
HCH-1 LNQR01000045 (Freshwater sediment; China)	79.1	79	78.9	79.1	79.1	79.6	78.5	78.9	80.4	81.4	80	80.2	81.1	81.8	81.3	81.3	81.3	81	80.2	80.9	82.8	81.8	79.9	80.6	81.1	80.2	81.1	81.5	80.8	80.5	80.8	80.6	80.2	79.8	79.9	79.7	78.6	79.1	81	79.6	88.1	88.2	87.5	85.4	86.8	86	85.9	100	91.6
Candidatus Magnetobacterium casensis JMFO01000010	79.3	80.1	79.7	79.9	80.3	79.9	80.1	80.4	80.7	81	80.8	80.8	81.2	81.8	81.9	81.3	81.3	81	80.2	80.8	82.3	81.1	81.2	81.8	82.3	81.2	80.9	81.3	81.4	81.2	81.1	81.2	80.5	80.3	79.5	80.7	78.8	79.7	82.5	81.1	89	88.4	88.2	85.7	87.2	86	85.8	91.6	100
JdFR-88 MTOX01000013 (Hydrothermal fluid; Pacific Ocean)	79.9	80.9	80.3	80.9	81	80.3	80.1	79.7	80.8	80.4	81.2	79.3	81	81.6	82.4	81	80.9	80.7	79.3	80.1	81.4	80.5	82.2	82	83.1	82.3	80.6	81.9	81.1	80.9	80.9	80.8	80.5	79	79.3	80	80	80.6	81.8	79.9	87.2	87	88.3	85.8	87.4	85.9	85.2	86.5	87.9
Thermodesulfovibrio islandicus AXWU01000024	79	79.4	79.2	79.3	79.6	79.8	78.6	79.1	79.5	80.5	79.8	79.4	81.2	81.7	81.4	81	81	80.8	80.5	81.2	81.4	80.4	81.4	81	82.9	82.4	80.9	82.3	81.8	81.5	81.5	81.5	80.9	78.7	79.1	80.1	80	80.8	81.8	82.4	86.3	85	86.8	86.3	86.8	85.8	84.6	85.3	85.4
Thermodesulfovibrio yellowstonii CP001147	78.8	79.2	79.1	79.2	79.5	79.6	78.5	79	79.4	80.5	79.8	79.7	81.4	81.8	81.4	81.1	81.1	80.9	80.5	81.1	81.5	80.5	81.4	81.1	82.8	82.3	80.8	82.4	81.7	81.4	81.5	81.4	81	78.8	79.2	80.1	80	80.7	81.8	82.6	86.4	85.1	86.8	86.5	86.9	85.9	84.7	85.3	85.5
Thermodesulfovibrio thiophilus AUIU01000004	79.1	79.4	79.4	79.4	79.6	79.6	78.7	79	79.2	80.7	80	79.2	80.7	81	80.9	80.8	80.8	80.5	80.1	80.6	81.2	80.1	80.5	80.7	81.8	81.2	80.8	81.9	81.9	81.7	81.7	81.4	80.7	78.9	79.3	80.4	80.2	81	81.3	81.5	86.7	85.3	86.2	85.7	86.4	84.8	84.1	85.1	85.3
Thermodesulfovibrio aggregans AB021302	79.7	80.1	80.2	80	80.4	80.1	79.3	79.7	80.6	80.7	80.2	79.9	81.9	82.1	82	81	81	80.9	80.5	80.9	81	80	82	81.8	83.2	82.9	81.1	83	81.7	81.5	81.4	81.1	80.1	78.7	79.2	80	80.9	81.1	82.3	82.1	86.3	85.1	86.7	86.8	86.7	85.5	84.6	84.4	85
Thermodesulfovibrio hydrogeniphilus EF081294	79.9	79.9	80.2	80.5	80.4	80.4	80.1	80.5	80.8	81.6	80.2	80.2	81.9	82.3	81.8	80.8	80.8	80.7	80.2	80.7	80.9	80.1	82	81.5	82.1	81.7	80.7	83.3	81.8	81.6	81.7	81.7	80.6	79	79.7	79.9	79.9	81.3	82.2	81.2	87.2	85.9	86.9	86	87.4	85.4	84.5	86	85.6
Candidatus Methylomirabilis oxyfera FP565575	79.1	78.5	78.8	79.8	79.4	79.1	79.1	78.6	79.3	80.1	79.6	78.4	79.7	81	81.5	79.4	79.3	79	78.1	79	79	78.2	80	80.7	82.4	82.1	81	80.9	81.4	81.2	81.3	81.3	79.6	78.7	80.8	79.7	79.3	80.6	81.5	78.6	79.7	77.9	79.2	77.6	79.9	79	77.6	79.3	80.1
Nitrospina gracilis CAQJ01000065	77.6	77.6	77.9	78.5	78.2	77.9	78	78.5	78.9	79.9	80.5	78.4	79.2	79.3	79.9	79	79	78.7	77.9	78.5	78.8	78	80	81.3	81.8	81.1	81.4	81.8	81.5	81.3	81.4	80.6	80.2	79.5	78.5	78.6	77.8	80.1	80.9	81.7	79.5	77.9	79.1	77.7	78.3	78.8	78.7	79.2	79.8
Acidobacterium capsulatum AB561885	80	79.8	80.5	80.2	80.2	80.4	79.5	79.9	80	79.1	79.9	78.9	77.8	78.4	78.9	78.4	78.4	78.2	77.1	77.6	78.8	78.6	80	79.9	81.5	80.9	80	78.3	82.2	82	81.8	81.5	80.9	80.3	80.2	81.2	79.1	81.3	80.5	79.6	78.6	78.2	79.5	77.7	79.2	80.4	78.1	77.3	78.9
Desulfovibrio vulgaris AF418179	79.3	79	78.9	78.8	78.9	79.6	78.5	78.6	79.2	78.6	79.9	78.8	77.8	78.4	79.3	78.1	78.1	77.9	76.7	77.3	77.3	77.1	78.7	78.7	78.3	78.2	79.6	79.7	80.4	80.2	80.5	80	80.1	80.4	78.9	78.4	78.4	79.3	81	77.4	78.1	77.2	77.8	77.7	78.6	78.8	77.9	79.5	78.3
Ramlibacter tataouinensis TTB310 CP000245	77.4	77	76.9	76.4	76.9	76.8	76	75.8	77.3	77	76.3	75.1	75.1	75.5	77.1	75.4	75.4	75.1	74.8	75.3	76.2	75.5	76.2	75.7	77.4	76.6	76.1	77	77	76.7	76.7	76	76	76.6	75.8	76.4	78.1	76.7	76.1	75.5	78	77.5	76.3	76.9	78.4	75.8	74.6	77.7	77.5
[truncated: 11 more columns]
