# Supplementary material for: Bacterial chemolithoautotrophy via manganese oxidation
Source: Springer Nature journal article supplement (doi:10.1038/s41586-020-2468-5), 2020-07-15
Supplement: MOESM5 [file 41586_2020_2468_MOESM5_ESM.xlsx]

## Sheet: Mn_RNA_IMG_TPM_sleuth_expressio
Supplementary Table 3 | Transcriptomics of the co-culture after oxidising different amounts of Mn(II).
IMG locus tag	IMG gene ID	Species	Mn12 (18% Mn(II) oxidized)	Mn09 (19% Mn(II) oxidized)	Mn10 (45% Mn(II) oxidized)	Mn11 (61% Mn(II) oxidized)	Mn08 (66% Mn(II) oxidized)	Mn06 (73% Mn(II) oxidized)	Mn03 (77% Mn(II) oxidized)	Gene product name
Ga0265800_1011	2778262154	B	0	2.49833	0.873015	0.174246	2.49814	1.41588	3.00686	hypothetical protein
Ga0265800_1012	2778262155	B	0	2.38543	0.267932	0.855626	3.4075	1.47075	2.76845	hypothetical protein
Ga0265800_1013	2778262156	B	0	2.09096	1.34509	1.19319	2.28088	0.522068	1.99467	IclR family transcriptional regulator
Ga0265800_1014	2778262157	B	7.50739	11.2168	2.24801	6.21252	5.05819	5.95422	6.70037	3-oxoadipate CoA-transferase alpha subunit
Ga0265800_1015	2778262158	B	0	10.7079	2.10474	6.56863	5.59688	3.72384	7.00206	3-oxoadipate CoA-transferase beta subunit
Ga0265800_1016	2778262159	B	9.46351	6.63146	1.49473	4.59931	3.67928	3.38592	7.29698	acetyl-CoA C-acetyltransferase
Ga0265800_1017	2778262160	B	2.39335	6.1001	2.81153	5.41349	3.78598	3.71387	5.981	hypothetical protein
Ga0265800_1018	2778262161	B	0	6.54737	3.20308	6.94102	4.94653	4.1102	8.56958	tripartite-type tricarboxylate transporter receptor subunit TctC
Ga0265800_1019	2778262162	B	5.64663	9.50011	4.12487	4.40569	7.8689	4.56187	8.90335	variant-surface-glycoprotein phospholipase C
Ga0265800_10110	2778262163	B	0	18.0224	4.72332	8.05142	15.4234	15.8623	26.6006	DNA-binding transcriptional LysR family regulator
Ga0265800_10111	2778262164	B	10.2347	1.69909	3.14327	4.07789	7.59535	6.98011	11.9426	uncharacterized protein DUF1446
Ga0265800_10112	2778262165	B	13.6359	3.59532	6.1247	8.65107	20.9711	18.5733	19.2693	hypothetical protein
Ga0265800_10113	2778262166	B	10.349	5.00258	5.12511	10.1817	19.0993	24.148	18.6783	tripartite-type tricarboxylate transporter receptor subunit TctC
Ga0265800_10114	2778262167	B	10.2809	6.325	10.3899	25.5938	34.7849	72.6761	47.2931	cardiolipin synthase
Ga0265800_10115	2778262168	B	0	1.55887	2.14488	7.33881	5.84531	6.26915	9.89388	hypothetical protein
Ga0265800_10116	2778262169	B	0	2.43192	0	3.05305	0	1.90833	3.29279	hypothetical protein
Ga0265800_10117	2778262170	B	5.12408	3.15244	3.54082	2.54417	47.7333	4.06398	116.466	hypothetical protein
Ga0265800_10118	2778262171	B	10.6916	0.939674	2.95523	3.53902	18.3222	3.1338	51.0514	hypothetical protein
Ga0265800_10119	2778262172	B	4.14421	2.18537	2.57734	3.65805	8.37663	4.00136	22.5622	3',5'-cyclic AMP phosphodiesterase CpdA
Ga0265800_10120	2778262173	B	6.449	4.25095	2.11677	7.20452	9.35138	10.7299	15.6365	uncharacterized protein YgbK (DUF1537 family)
Ga0265800_10121	2778262174	B	3.2889	3.0351	3.06812	11.3401	8.52653	20.0172	16.0955	4-hydroxythreonine-4-phosphate dehydrogenase
Ga0265800_10122	2778262175	B	11.2015	5.41464	4.25721	18.0754	12.5512	45.579	25.9931	phospholipid N-methyltransferase
Ga0265800_10123	2778262176	B	2.31418	2.10169	1.06609	4.12795	3.66074	9.73564	7.0224	penicillin-binding protein 1A
Ga0265800_10124	2778262177	B	10.0099	3.51901	1.72924	3.58946	4.17851	5.86793	6.70037	aspartate racemase
Ga0265800_10125	2778262178	B	0	6.34405	1.51807	4.5016	3.30969	3.67954	5.04183	hypothetical protein
Ga0265800_10126	2778262179	B	0	4.62386	3.06144	3.81897	3.65014	4.58319	9.55576	glutathione S-transferase
Ga0265800_10127	2778262180	B	0	4.88591	3.01832	4.16223	7.67728	3.83399	9.92323	DnaJ-like protein
Ga0265800_10128	2778262181	B	4.36386	4.98594	1.35697	2.40746	2.87628	2.6334	5.38775	3-oxoacyl-[acyl-carrier protein] reductase
Ga0265800_10129	2778262182	B	2.35127	4.95959	3.53385	4.15087	5.94072	5.12826	10.7549	signal transduction histidine kinase
Ga0265800_10130	2778262183	B	13.5925	32.9376	5.23304	13.6048	8.19111	12.0526	14.8465	hypothetical protein
Ga0265800_10131	2778262184	B	17.3509	39.6486	6.39452	11.8056	8.6407	6.98034	9.63556	translation initiation factor 1
Ga0265800_10132	2778262185	B	9.86002	24.481	3.40671	6.3915	7.3654	5.01508	6.89341	hypothetical protein
Ga0265800_10133	2778262186	B	3.61639	14.859	1.12454	2.64349	2.70143	1.74587	3.5235	GGDEF domain-containing protein
Ga0265800_10134	2778262187	B	0	11.8353	4.08528	3.62393	5.48423	4.64359	9.57584	hypothetical protein
Ga0265800_10135	2778262188	B	2.04635	10.4314	2.54531	3.3868	2.33789	3.73994	6.08793	aryl-alcohol dehydrogenase-like predicted oxidoreductase
Ga0265800_10136	2778262189	B	0	10.3127	2.31665	2.46604	2.94627	2.69748	6.81545	reactive intermediate/imine deaminase
Ga0265800_10137	2778262190	B	3.30507	6.29368	1.14192	1.15478	2.13001	1.63356	3.47419	N-acyl-D-amino-acid deacylase
Ga0265800_10138	2778262191	B	1.68944	4.75144	0.466972	0.652422	2.0786	1.33992	2.41253	peptide/nickel transport system ATP-binding protein
Ga0265800_10139	2778262192	B	1.60179	2.95637	0.996177	1.23715	1.40769	0.552351	3.52636	peptide/nickel transport system ATP-binding protein
Ga0265800_10140	2778262193	B	0	1.84821	1.05683	0.527332	0.50402	1.38438	2.61621	peptide/nickel transport system permease protein
Ga0265800_10141	2778262194	B	0	2.99531	0.991593	0.79165	1.41872	1.11336	2.50809	peptide/nickel transport system permease protein
Ga0265800_10142	2778262195	B	1.00529	2.91566	0.833602	1.38649	1.41354	1.14396	2.81129	peptide/nickel transport system substrate-binding protein
Ga0265800_10143	2778262196	B	2.15531	2.84141	1.04255	1.72411	2.55707	2.30399	5.22584	microcystin degradation protein MlrC
Ga0265800_10144	2778262197	B	0	3.69579	1.24533	1.98846	2.11172	2.14055	4.40835	peptide/nickel transport system substrate-binding protein
Ga0265800_10145	2778262198	B	1.08954	1.91516	0.903466	1.44259	1.81927	1.8034	3.07932	microcystin degradation protein MlrC
Ga0265800_10146	2778262199	B	0	2.01703	0.693816	1.42436	1.63871	2.22577	3.45647	D-arginine dehydrogenase
Ga0265800_10147	2778262200	B	2.50246	3.07913	1.03754	3.17529	1.31953	2.76138	2.9035	XRE family transcriptional regulator
Ga0265800_10148	2778262201	B	3.33328	6.59155	3.45502	12.0448	7.46986	13.9655	12.8419	aryl-alcohol dehydrogenase-like predicted oxidoreductase
Ga0265800_10149	2778262202	B	0	5.76905	3.88787	14.5885	9.55941	18.8193	25.9445	carboxymethylenebutenolidase
Ga0265800_10150	2778262203	B	2.61097	2.29475	1.6238	1.15234	2.52403	1.35052	3.3401	predicted MFS family arabinose efflux permease
Ga0265800_10151	2778262204	B	1.66664	2.34366	1.15167	1.10334	3.66169	2.41379	5.25578	luciferase family oxidoreductase group 1
Ga0265800_10152	2778262205	B	1.31592	2.31308	0.909319	2.68607	4.51017	2.1781	10.8833	MFS transporter
Ga0265800_10153	2778262206	B	0	0.727713	1.14431	3.19752	10.1872	4.28279	18.4747	uncharacterized protein DUF4389
Ga0265800_10154	2778262207	B	0	2.35948	2.1643	2.71527	8.25756	3.5487	14.2431	nucleotide-binding universal stress UspA family protein
Ga0265800_10155	2778262208	B	0	0.29454	1.85263	0.924421	9.13006	0.462253	15.5534	hemerythrin HHE cation binding domain-containing protein
Ga0265800_10156	2778262209	B	6.14802	2.97188	3.18628	17.1283	19.1807	57.93	34.0659	lipoprotein-anchoring transpeptidase ErfK/SrfK
Ga0265800_10157	2778262210	B	2.66443	3.27842	4.97113	14.9931	16.8592	52.83	31.6276	murein DD-endopeptidase MepM/ murein hydrolase activator NlpD
Ga0265800_10158	2778262211	B	4.7683	1.99063	2.96547	8.02327	11	19.8545	18.7961	predicted MFS family arabinose efflux permease
Ga0265800_10159	2778262212	B	2.95092	6.4838	3.87434	6.51185	9.59529	8.85287	14.0464	FHA domain-containing protein
Ga0265800_10160	2778262213	B	14.4253	10.7764	6.97765	20.2933	20.2835	33.3278	29.8262	hypothetical protein
Ga0265800_10161	2778262214	B	4.31794	9.86695	6.86266	12.3871	19.3529	26.0569	30.3164	thioredoxin
Ga0265800_10162	2778262215	B	17.846	6.90124	6.41258	13.3896	20.7022	24.3694	31.8553	2'-5' RNA ligase
Ga0265800_10163	2778262216	B	10.5772	6.97213	8.03992	15.4634	23.2387	28.4495	22.4992	hypothetical protein
Ga0265800_10164	2778262217	B	9.67168	7.65027	12.6982	20.8091	25.499	39.0208	25.896	hypothetical protein
Ga0265800_10165	2778262218	B	29.5535	8.65806	9.53024	16.3041	21.6435	44.8405	22.8597	hypothetical protein
Ga0265800_10166	2778262219	B	20.0573	10.0732	7.32596	22.7628	25.6847	63.1371	29.1535	CDP-diacylglycerol--serine O-phosphatidyltransferase
Ga0265800_10167	2778262220	B	0	6.95022	2.55012	8.72536	7.18135	10.7259	13.2532	hypothetical protein
Ga0265800_10168	2778262221	B	12.7313	8.57849	5.2785	5.38476	5.2213	7.6096	12.8777	hypothetical protein
Ga0265800_10169	2778262222	B	6.54836	6.33079	5.43002	5.05764	9.7832	9.93558	15.1955	hypothetical protein
Ga0265800_10170	2778262223	B	2.91959	8.85265	2.82447	5.79845	6.28619	8.20517	11.1178	amino acid/amide ABC transporter substrate-binding protein (HAAT family)
Ga0265800_10171	2778262224	B	1.25571	2.86943	1.12803	2.35535	3.08992	2.90116	5.26741	sugar phosphate permease
Ga0265800_10172	2778262225	B	3.62302	3.82106	2.12803	1.84884	2.62678	1.874	4.20362	PAS domain S-box-containing protein
Ga0265800_10173	2778262226	B	3.54204	7.16001	2.4476	3.06138	6.74443	4.84493	10.081	tryptophan synthase beta chain
Ga0265800_10174	2778262227	B	4.88129	4.2901	2.02383	3.09685	4.28978	5.80714	8.71314	phosphoserine phosphatase
Ga0265800_10175	2778262228	B	2.91608	5.38209	1.61204	1.28699	3.58779	2.41334	5.29197	uncharacterized membrane protein
Ga0265800_10176	2778262229	B	2.19284	2.62106	1.33345	2.58885	2.1969	3.17588	4.0447	transcription-repair coupling factor
Ga0265800_10177	2778262230	B	10.0099	9.2374	4.84187	6.07447	10.5562	11.477	18.4633	2-C-methyl-D-erythritol 4-phosphate cytidylyltransferase
Ga0265800_10178	2778262231	B	16.143	20.9271	6.9719	13.5813	16.6694	16.004	31.0965	2-C-methyl-D-erythritol 2,4-cyclodiphosphate synthase
Ga0265800_10179	2778262232	B	7.72906	14.5563	6.10388	11.8782	14.5552	15.1918	26.903	two-component system osmolarity sensor histidine kinase EnvZ
Ga0265800_10180	2778262233	B	0	9.42003	6.74805	11.6946	18.6293	18.3156	30.5403	two-component system phosphate regulon response regulator OmpR
Ga0265800_10181	2778262234	B	0	5.28431	2.49284	2.91894	2.11356	4.31248	6.51096	predicted secreted protein
Ga0265800_10182	2778262235	B	5.08572	4.91674	4.21717	9.53935	9.08784	35.2498	11.3475	diacylglycerol kinase family enzyme
Ga0265800_10183	2778262236	B	16.8597	5.001	3.93198	12.3241	9.63082	36.4814	16.364	3',5'-cyclic AMP phosphodiesterase CpdA
Ga0265800_10184	2778262237	B	6.72398	3.74276	2.9427	7.29533	7.68192	18.24	13.8694	3-hydroxybutyrate dehydrogenase
Ga0265800_10185	2778262238	B	5.38118	3.31061	2.35503	4.65095	5.20199	9.0306	9.49871	pimeloyl-ACP methyl ester carboxylesterase
Ga0265800_10186	2778262239	B	0.709362	4.17711	2.05876	3.24813	3.80275	5.2836	6.45771	GTP pyrophosphokinase
Ga0265800_10188	2778262241	B	239.358	222.99	98.1372	80.99	130.418	85.8398	192.265	hypothetical protein
Ga0265800_10189	2778262242	B	135.726	195.001	96.2689	60.335	104.393	76.8569	170.725	hypothetical protein
Ga0265800_10190	2778262243	B	62.4412	101.83	49.1406	24.4961	53.0454	25.7185	58.7218	polyhydroxyalkanoate synthesis repressor PhaR
Ga0265800_10191	2778262244	B	95.447	94.3218	50.7534	43.0882	50.9422	47.1221	93.5323	SSU ribosomal protein S12P methylthiotransferase
Ga0265800_10193	2778262246	B	34.6971	43.7727	22.3778	14.8348	16.9614	14.4075	33.7629	RNAse R
Ga0265800_10194	2778262247	B	47.8715	37.8663	17.6426	29.9311	32.254	17.0579	71.6839	hypothetical protein
Ga0265800_10195	2778262248	B	20.747	21.4013	14.7138	9.39754	29.4605	5.27155	58.8963	FtsP/CotA-like multicopper oxidase with cupredoxin domain
Ga0265800_10196	2778262249	B	11.1975	13.2858	8.25352	2.9343	2.54216	1.73757	6.38496	hypothetical protein
Ga0265800_10197	2778262250	B	4.39188	7.10233	4.49159	1.88987	2.62458	0.908678	7.57822	feruloyl-CoA synthase
Ga0265800_10198	2778262251	B	0	2.40301	3.46379	2.26257	4.80566	1.72851	14.3703	hypothetical protein
Ga0265800_10199	2778262252	B	4.39236	4.3751	2.73167	4.03863	4.88945	2.97877	8.92934	3-deoxy-D-arabinoheptulosonate-7-phosphate synthase
Ga0265800_101100	2778262253	B	6.39126	4.49375	4.652	8.08615	11.6829	5.86241	21.1056	indolepyruvate ferredoxin oxidoreductase
Ga0265800_101101	2778262254	B	0	1.9527	1.27941	0.612858	0.325425	0.766145	1.2118	AsnC family transcriptional regulator
Ga0265800_101102	2778262255	B	1.64994	3.77029	1.48218	0.364097	1.74	2.61719	1.81618	ring-1,2-phenylacetyl-CoA epoxidase subunit PaaA
Ga0265800_101103	2778262256	B	0	2.81888	2.21631	1.32707	2.114	4.42396	5.48656	ring-1,2-phenylacetyl-CoA epoxidase subunit PaaB
Ga0265800_101104	2778262257	B	0	2.15707	0.770898	1.47709	2.74516	2.76981	4.91201	ring-1,2-phenylacetyl-CoA epoxidase subunit PaaC
Ga0265800_101105	2778262258	B	0	2.50954	0.739913	0.787625	4.0777	0.861545	4.03501	ring-1,2-phenylacetyl-CoA epoxidase subunit PaaD
Ga0265800_101106	2778262259	B	0	2.80192	1.04904	0.586259	1.46756	1.41344	3.20665	ring-1,2-phenylacetyl-CoA epoxidase subunit PaaE
Ga0265800_101107	2778262260	B	3.00476	2.64084	1.45343	1.9892	3.43284	2.27951	6.16805	TetR family transcriptional regulator
Ga0265800_101108	2778262261	B	1.03103	3.86629	1.02119	1.63056	3.44315	2.07395	5.6439	hemolysin type calcium-binding protein
Ga0265800_101109	2778262262	B	0	2.81317	0.829434	2.72233	3.04737	2.52943	6.9435	aspartate aminotransferase
Ga0265800_101110	2778262263	B	0	3.77906	1.69785	2.71101	3.77877	5.50724	6.94425	enamine deaminase RidA (YjgF/YER057c/UK114 family)
Ga0265800_101111	2778262264	B	0	2.8406	1.05792	0.37538	2.09291	0.234635	2.37854	phosphoglycerate dehydrogenase-like enzyme
Ga0265800_101112	2778262265	B	0	4.45448	1.05069	0.27961	2.37554	0.757346	3.16645	tripartite-type tricarboxylate transporter receptor subunit TctC
Ga0265800_101113	2778262266	B	1.00529	5.21284	0.694668	1.10919	2.82709	1.35196	4.24685	peptide/nickel transport system substrate-binding protein
Ga0265800_101114	2778262267	B	0	4.95478	0.486956	0.680343	4.33511	1.27576	3.9309	peptide/nickel transport system permease protein
Ga0265800_101115	2778262268	B	0	2.25623	0.506838	0.809281	1.77261	1.26462	2.78215	peptide/nickel transport system permease protein
Ga0265800_101116	2778262269	B	0	0.742413	0.466972	0.559219	1.18777	1.22341	2.41253	peptide/nickel transport system ATP-binding protein/oligopeptide transport system ATP-binding protein
Ga0265800_101117	2778262270	B	0	0.302132	0.593869	0.474123	0.755272	0.474167	1.32952	oligopeptide transport system ATP-binding protein
Ga0265800_101118	2778262271	B	0	0.425095	0.111409	0.177889	0.566751	0.50036	1.00726	hypothetical protein
Ga0265800_101119	2778262272	B	0	0.701622	0.110329	0.440411	1.12251	0.715735	0.99749	L-threonine aldolase
Ga0265800_101120	2778262273	B	0	0.580045	0.456054	0.182048	0.29	0.341372	0.785376	hypothetical protein
Ga0265800_101121	2778262274	B	0	4.29196	1.15444	0.779866	3.16226	1.15218	5.00841	amino acid/amide ABC transporter substrate-binding protein (HAAT family)
Ga0265800_101122	2778262275	B	0	4.03626	0.965838	0.881244	3.50953	0.826244	6.83133	branched-chain amino acid transport system permease protein
Ga0265800_101123	2778262276	B	0	1.76969	1.1595	0.37028	1.62209	0.752202	3.39453	amino acid/amide ABC transporter membrane protein 2 (HAAT family)
Ga0265800_101124	2778262277	B	0	2.41871	0.633896	0.759119	2.01544	0.948987	3.4796	amino acid/amide ABC transporter ATP-binding protein 1 (HAAT family)
Ga0265800_101125	2778262278	B	2.47737	1.08866	0.342379	0.9567	2.61259	1.11056	3.6851	amino acid/amide ABC transporter ATP-binding protein 2 (HAAT family)
Ga0265800_101126	2778262279	B	0.715527	3.96186	0.889992	1.02633	1.50917	1.62846	3.53364	uncharacterized protein DUF1631
Ga0265800_101127	2778262280	B	0	0.302132	0	0.0948246	0.302109	0.237084	1.02271	gluconate 2-dehydrogenase
Ga0265800_101128	2778262281	B	0	0.617147	0.121306	0.290539	0.6171	0.726416	1.25342	2-dehydro-3-deoxygluconokinase
Ga0265800_101129	2778262282	B	0	1.36039	0.611197	0	0.388654	0.152501	0.723628	sugar phosphate isomerase/epimerase
Ga0265800_101130	2778262283	B	0	0.570263	0.298909	0.357956	0.190073	0.223744	0.643443	amino acid ABC transporter ATP-binding protein (PAAT family)
Ga0265800_101131	2778262284	B	0	0	0.146882	0.117265	0.186802	0.219893	0.695605	amino acid ABC transporter substrate-binding protein (PAAT family)
Ga0265800_101132	2778262285	B	0	0.71801	0	0	0	0.187808	0.648119	amino acid ABC transporter membrane protein 2 (PAAT family)
Ga0265800_101133	2778262286	B	0	1.62172	0	0.290845	0.231656	0.363591	0.156842	amino acid ABC transporter membrane protein 1 (PAAT family)
Ga0265800_101134	2778262287	B	0	0.954507	0.21442	0.171185	1.22713	0.535003	2.07706	LacI family transcriptional regulator
Ga0265800_101135	2778262288	B	0	0.481689	0.252482	0.302358	9.31195	0.377983	19.403	sulfide dehydrogenase (flavoprotein) subunit SudB
Ga0265800_101136	2778262289	B	0	0.469472	0.590587	1.00194	13.0503	0.810471	22.407	sulfide dehydrogenase (flavoprotein) subunit SudA
Ga0265800_101137	2778262290	B	0	0.215504	0.169438	0.586182	3.73512	0.394583	6.97866	2-oxoglutarate ferredoxin oxidoreductase subunit alpha
Ga0265800_101138	2778262291	B	0	1.05015	0.117953	0.188339	1.65012	0.176584	2.69145	2-oxoglutarate ferredoxin oxidoreductase subunit beta
Ga0265800_101139	2778262292	B	0.707331	0.745996	0.293266	0.273155	1.74053	0.390257	2.1464	hypothetical protein
Ga0265800_101140	2778262293	B	4.37938	1.53959	0.50437	1.53015	1.92434	1.9632	4.21262	L-2-hydroxyglutarate oxidase LhgO
Ga0265800_101141	2778262294	B	0	2.48321	0.92482	1.18955	2.35234	1.79475	3.18528	iron complex outermembrane receptor protein
Ga0265800_101142	2778262295	B	1.56624	4.26731	1.0823	2.33298	3.85405	1.99834	4.19364	dihydroorotate oxidase A
Ga0265800_101143	2778262296	B	5.27199	12.5104	3.64302	6.10775	8.10797	10.5441	11.5279	ribose-5-phosphate isomerase
Ga0265800_101144	2778262297	B	2.67888	16.0101	5.36832	11.6753	13.4192	13.3022	22.7933	glutaredoxin
Ga0265800_101145	2778262298	B	6.095	7.43257	3.05351	7.39748	5.69118	9.11635	8.70369	oligopeptidase A
Ga0265800_101146	2778262299	B	3.99345	5.0892	2.48358	4.29607	4.56238	5.71485	7.90058	methenyltetrahydrofolate cyclohydrolase /5,10-methylenetetrahydrofolate dehydrogenase (NADP+)
Ga0265800_101147	2778262300	B	8.59601	13.0952	5.93997	7.5876	10.0725	9.38658	13.2981	LuxR family two component transcriptional regulator
Ga0265800_101148	2778262301	B	2.43831	4.71458	1.76915	2.58944	2.89282	3.61547	5.69438	PAS domain S-box-containing protein
Ga0265800_101149	2778262302	B	2.28334	3.56207	1.45949	2.67681	3.76246	3.70064	5.82497	pyruvate dehydrogenase E1 component
Ga0265800_101150	2778262303	B	0	3.07508	1.39027	2.81711	3.40726	3.97823	7.05532	pyruvate dehydrogenase E2 component (dihydrolipoamide acetyltransferase)
Ga0265800_101151	2778262304	B	0	4.06004	1.06406	2.20871	4.87168	2.44255	5.49727	ATP-dependent protease HslVU (ClpYQ) peptidase subunit
Ga0265800_101152	2778262305	B	6.08373	7.7912	3.64686	3.88369	5.88115	6.08381	10.865	dihydrolipoamide dehydrogenase
Ga0265800_101153	2778262306	B	16.5321	9.58972	3.42719	6.74914	10.4607	10.3755	17.8044	cell wall-associated NlpC family hydrolase
Ga0265800_101154	2778262307	B	2.95451	8.82871	2.65409	7.49775	6.75085	8.86366	12.3495	glucose/arabinose dehydrogenase
Ga0265800_101155	2778262308	B	8.26061	7.50214	2.66383	6.38011	7.25959	8.16578	9.994	LuxR family two component transcriptional regulator
Ga0265800_101156	2778262309	B	3.01768	9.28269	3.962	6.82566	10.3428	10.3019	14.3642	response regulator receiver domain-containing protein
Ga0265800_101157	2778262310	B	1.00121	1.67191	0.415111	0.386644	1.23184	1.27743	1.48931	4-hydroxybutyryl-CoA dehydratase/vinylacetyl-CoA-Delta-isomerase
Ga0265800_101158	2778262311	B	2.76897	1.21681	0.57402	1.37483	1.46006	1.7187	2.30656	TetR family transcriptional regulator
Ga0265800_101159	2778262312	B	0	2.15194	1.90343	2.53272	2.68972	2.53295	4.82583	nicotinamidase-related amidase
Ga0265800_101160	2778262313	B	1.65939	9.26091	2.17865	2.70058	6.41652	3.66214	9.9968	propionyl-CoA synthetase
Ga0265800_101162	2778262315	B	11.8079	18.2556	6.52757	11.0149	16.5089	15.1025	20.2789	2-oxoglutarate dehydrogenase E1 component
Ga0265800_101163	2778262316	B	13.0204	12.4734	4.76858	7.8296	7.78098	11.8533	15.5719	2-oxoglutarate dehydrogenase E2 component
Ga0265800_101164	2778262317	B	10.2112	9.87196	4.62568	7.32334	7.07936	8.92028	9.24858	dihydrolipoamide dehydrogenase
Ga0265800_101165	2778262318	B	14.9968	9.75354	4.45609	5.95687	7.11691	7.65364	9.90466	cell division protein ZapE
Ga0265800_101166	2778262319	B	2.86534	8.3104	4.15798	6.00685	6.04347	8.29971	11.3375	hypothetical protein
Ga0265800_101167	2778262320	B	2.27226	11.1835	3.92541	4.13674	8.98606	7.28699	10.8836	serine/threonine protein phosphatase PrpC
Ga0265800_101168	2778262321	B	0	17.5228	7.87262	7.07086	11.2638	14.7323	20.76	hypothetical protein
Ga0265800_101169	2778262322	B	9.17078	13.5678	4.85848	4.76421	6.85055	7.06266	13.4142	ATP-dependent DNA helicase DinG
Ga0265800_101170	2778262323	B	2.14405	11.4947	5.62997	6.86042	11.6822	7.68912	16.6481	Beta-barrel assembly machine subunit BamD
Ga0265800_101171	2778262324	B	3.20359	3.09715	2.10304	3.00451	2.39307	3.75598	5.43251	ribosomal large subunit pseudouridine synthase D
Ga0265800_101172	2778262325	B	34.4518	51.7075	32.78	39.4748	49.1417	57.9383	100.366	condensin subunit ScpB
Ga0265800_101173	2778262326	B	17.1304	47.2371	21.3072	26.993	32.7436	38.95	62.5572	pseudouridine synthase
Ga0265800_101174	2778262327	B	51.5528	84.4395	24.9366	58.9497	58.8973	52.6848	89.6518	nucleoside diphosphate kinase
Ga0265800_101175	2778262328	B	34.226	55.3987	25.523	36.5835	28.9505	32.6036	54.0933	23S rRNA m(2)A-2503 methyltransferase
Ga0265800_101176	2778262329	B	39.2055	46.0638	18.9641	28.3453	23.2115	22.2002	45.6112	type IV pilus assembly protein PilF
Ga0265800_101177	2778262330	B	33.5929	32.4767	16.9823	19.6055	13.8288	15.6688	36.5041	cytoskeleton protein RodZ
Ga0265800_101178	2778262331	B	21.9611	22.7074	11.6048	9.051	9.76345	7.5729	17.9478	4-hydroxy-3-methylbut-2-en-1-yl diphosphate synthase
Ga0265800_101179	2778262332	B	16.4076	11.3145	4.79681	4.66514	4.54764	3.65586	8.48593	histidyl-tRNA synthetase
Ga0265800_101180	2778262333	B	10.3236	16.3319	9.45227	9.39732	11.3408	12.9047	20.7312	predicted negative regulator of RcsB-dependent stress response
Ga0265800_101181	2778262334	B	5.68791	11.9977	6.97651	8.31545	6.49824	10.8856	19.629	Beta-barrel assembly machine subunit BamB
Ga0265800_101182	2778262335	B	7.20461	7.07077	5.9742	4.57084	5.38182	5.25861	10.5383	GTP-binding protein
Ga0265800_101183	2778262336	B	41.6965	78.7899	38.1771	48.3066	45.8046	74.7671	74.4285	RNA-binding protein Hfq
Ga0265800_101184	2778262337	B	31.8796	35.815	14.4627	23.1694	16.8098	23.7069	37.607	GTP-binding protein HflX
Ga0265800_101185	2778262338	B	10.8333	20.8408	9.8149	10.8241	12.9055	15.9388	17.4395	protease FtsH subunit HflK
Ga0265800_101186	2778262339	B	13.0292	15.0501	6.94544	8.52284	10.6324	10.0127	12.5699	protease FtsH subunit HflC
Ga0265800_101187	2778262340	B	47.8715	11.2196	8.82132	7.92294	11.2188	9.35434	9.96929	hypothetical protein
Ga0265800_101188	2778262341	B	5.65535	23.3609	8.49975	11.3878	12.1766	14.0411	28.7282	ATP phosphoribosyltransferase regulatory subunit
Ga0265800_101189	2778262342	B	3.64663	12.2857	4.45178	6.63885	7.90499	7.54485	11.572	adenylosuccinate synthetase
Ga0265800_101190	2778262343	B	0	9.41078	3.20629	5.31647	5.33237	5.04619	10.0875	hypothetical protein
Ga0265800_101191	2778262344	B	5.43748	6.2126	3.28771	3.44971	3.94232	3.28128	6.63239	cystathionine beta-lyase
Ga0265800_101192	2778262345	B	0	20.03	9.69132	10.6386	7.70327	13.9041	19.2973	hypothetical protein
Ga0265800_101193	2778262346	B	7.80647	10.4287	3.88396	6.71842	6.17443	8.72184	15.6532	tRNA 2-selenouridine synthase
Ga0265800_101194	2778262347	B	3.02315	6.64251	3.55137	5.83734	6.37633	7.8186	9.80335	acyl-CoA thioesterase-1
Ga0265800_101195	2778262348	B	5.10844	4.26525	3.00051	1.83185	2.91811	3.52311	7.06691	putative ABC transport system ATP-binding protein
Ga0265800_101196	2778262349	B	0	4.16659	2.94834	2.74616	3.54133	3.75997	5.50049	23S rRNA Gm-2251 2'-O-methyltransferase
Ga0265800_101197	2778262350	B	4.88129	3.64659	2.19248	3.63543	3.43182	2.27236	6.17181	NAD-dependent deacetylase
Ga0265800_101198	2778262351	B	0	1.07973	2.97124	1.01663	2.69912	1.05909	4.2031	hypothetical protein
Ga0265800_101199	2778262352	B	0.958475	2.19022	1.32464	1.26905	2.94814	1.75172	5.04711	hypothetical protein
Ga0265800_101200	2778262353	B	1.92817	0.932055	0.532959	0.531868	1.10144	0.498673	2.49531	formate-tetrahydrofolate ligase
Ga0265800_101201	2778262354	B	0	1.2357	0.323852	0.775654	0	0.969658	2.78855	uncharacterized protein DUF2784
Ga0265800_101202	2778262355	B	0	1.61248	0.316948	0.379559	1.00772	1.02807	1.501	hypothetical protein
Ga0265800_101203	2778262356	B	4.31794	2.65649	0.895129	1.42928	2.27682	3.72242	4.1107	uncharacterized protein (TIGR00369 family)
Ga0265800_101204	2778262357	B	0	3.09306	2.21081	0.353005	2.81166	2.31681	3.0458	chromate transporter
Ga0265800_101205	2778262358	B	0	3.4969	0.634478	1.18193	2.15178	1.5831	4.00635	chromate transporter
Ga0265800_101206	2778262359	B	0	2.4631	1.80748	1.33995	3.61227	1.03083	3.89085	uncharacterized membrane protein
Ga0265800_101207	2778262360	B	3.57447	2.98448	1.11151	2.46496	3.45545	4.80712	7.76289	MarR family transcriptional regulator with acetyltransferase activity
Ga0265800_101208	2778262361	B	0	3.47625	2.1258	2.18206	2.70355	4.54638	4.83756	quercetin dioxygenase-like cupin family protein
Ga0265800_101209	2778262362	B	0	2.44733	1.15451	1.84344	2.93657	3.45677	4.3906	TetR family transcriptional regulator
Ga0265800_101210	2778262363	B	2.31485	4.27242	2.07947	3.70346	4.67896	3.67187	5.44049	3-oxoacyl-[acyl-carrier-protein] reductase
Ga0265800_101211	2778262364	B	0	3.64113	1.36324	7.07433	5.89472	6.3947	8.45153	sugar lactone lactonase YvrE
Ga0265800_101212	2778262365	B	2.39335	3.57592	2.81153	7.79015	10.3063	10.8115	14.8813	hypothetical protein
Ga0265800_101213	2778262366	B	3.30507	3.3889	2.35998	1.64101	2.80774	2.2414	5.37516	coniferyl-aldehyde dehydrogenase
Ga0265800_101214	2778262367	B	2.89142	4.38363	2.79722	2.71174	4.25624	3.81374	7.52677	short chain enoyl-CoA hydratase /3-hydroxyacyl-CoA dehydrogenase
Ga0265800_101215	2778262368	B	1.34824	5.45077	2.60863	4.16527	5.33187	5.16058	9.06493	acetyl-CoA C-acetyltransferase
Ga0265800_101216	2778262369	B	6.98917	5.52842	3.47733	6.40061	7.12498	9.06195	9.68948	acyl-CoA dehydrogenase
Ga0265800_101217	2778262370	B	0	14.7594	8.16609	13.7253	17.4913	27.6676	30.3463	hypothetical protein
Ga0265800_101218	2778262371	B	0	8.74227	6.87352	27.4378	15.2978	43.7331	29.5924	hypothetical protein
Ga0265800_101219	2778262372	B	21.4026	26.7109	12.4232	23.1425	16.9282	21.9934	24.5778	uncharacterized tellurite resistance protein B-like protein
Ga0265800_101220	2778262373	B	99.9985	53.8309	60.4629	110.334	155.988	418.534	159.904	hypothetical protein
Ga0265800_101221	2778262374	B	56.3649	61.6977	40.7194	80.5654	102.672	175.458	120.734	hypothetical protein
Ga0265800_101222	2778262375	B	30.1668	49.1464	20.6932	44.8128	57.872	65.6372	69.4989	cell division protease FtsH
Ga0265800_101223	2778262376	B	0	34.224	23.6268	63.9236	65.9388	120.523	90.9826	uncharacterized protein DUF3606
Ga0265800_101224	2778262377	B	45.0714	28.5211	20.5557	61.4995	57.302	69.3177	72.2287	hypothetical protein
Ga0265800_101225	2778262378	B	33.1198	45.1182	21.742	109.629	78.5871	86.7979	105.675	hypothetical protein
Ga0265800_101226	2778262379	B	121.914	37.5019	27.3794	141.241	85.7122	166.057	162.306	hypothetical protein
Ga0265800_101227	2778262380	B	62.214	48.6036	27.7052	133.094	103.882	161.854	186.116	hypothetical protein
Ga0265800_101228	2778262381	B	36.7854	118.005	49.5676	171.483	139.009	283.506	238.573	hypothetical protein
Ga0265800_101229	2778262382	B	11.9873	16.8568	13.2535	35.7111	56.8873	105.821	62.0526	hypothetical protein
Ga0265800_101230	2778262383	B	33.1584	12.6284	8.40141	24.3904	33.0256	73.9404	57.5438	hypothetical protein
Ga0265800_101231	2778262384	B	8.28842	13.8407	10.7389	20.4622	29.5003	38.656	41.1174	exodeoxyribonuclease III
Ga0265800_101232	2778262385	B	12.8809	12.1699	12.0162	40.6825	37.6389	94.8311	63.2292	hypothetical protein
Ga0265800_101233	2778262386	B	23.6063	26.9714	11.4186	54.6971	60.1625	78.9601	75.145	hypothetical protein
Ga0265800_101234	2778262387	B	28.8505	49.4449	22.4282	81.173	95.7129	117.394	116.086	hypothetical protein
Ga0265800_101235	2778262388	B	12.5535	11.0331	8.24095	29.0873	27.0291	56.0588	33.4255	protease I
Ga0265800_101236	2778262389	B	14.2463	4.53883	4.55305	6.68051	8.45098	7.06186	13.6155	cysteine synthase A
Ga0265800_101237	2778262390	B	7.94173	4.88591	3.5671	2.62878	8.02625	4.65556	10.5139	hypothetical protein
Ga0265800_101238	2778262391	B	1.90436	5.52326	5.39536	5.67323	8.36794	7.15787	16.9398	EamA-like transporter family protein
Ga0265800_101239	2778262392	B	2.80036	2.4612	2.32211	2.78083	7.13694	1.73818	4.91536	threonine/homoserine/homoserine lactone efflux protein
Ga0265800_101240	2778262393	B	0	2.84378	3.22962	2.97509	5.05523	4.46305	9.84006	putative acetyltransferase
Ga0265800_101241	2778262394	B	3.39048	6.25767	3.16288	3.08626	4.61841	5.72882	13.5666	tripartite-type tricarboxylate transporter receptor subunit TctC
Ga0265800_101242	2778262395	B	0	4.64903	4.49877	2.24478	3.5759	3.22717	10.8947	putative tricarboxylic transport membrane protein
Ga0265800_101243	2778262396	B	3.1912	3.55262	1.98465	1.34973	3.2719	1.10043	4.46211	TctA family transporter
Ga0265800_101244	2778262397	B	3.11275	2.59897	1.18303	1.80311	1.50455	4.29351	5.27847	L-lactate dehydrogenase
Ga0265800_101245	2778262398	B	0	4.51263	3.54801	5.1931	7.52049	23.017	13.7477	hypothetical protein
Ga0265800_101246	2778262399	B	0	4.89073	0.887373	8.02905	7.14744	21.9934	15.6636	CHRD domain-containing protein
Ga0265800_101247	2778262400	B	1.00121	2.90384	2.28311	4.7502	5.36729	8.52768	7.92312	3-(3-hydroxy-phenyl)propionate hydroxylase
Ga0265800_101248	2778262401	B	31.9144	4.20736	1.10267	6.16229	0	2.75128	3.3231	hypothetical protein
Ga0265800_101249	2778262402	B	32.5257	26.1851	11.103	32.8013	19.0943	37.1696	40.2733	uncharacterized radical SAM protein YgiQ
Ga0265800_101250	2778262403	B	15.7706	10.0848	4.50941	7.77031	6.78639	7.12595	13.5414	PAS domain S-box-containing protein
Ga0265800_101251	2778262404	B	0	5.89584	2.54955	2.92367	3.59619	3.58553	4.35069	uncharacterized protein DUF2868
Ga0265800_101252	2778262405	B	4.026	5.13067	2.50382	6.44109	7.96079	10.0651	12.8158	rsbT co-antagonist protein RsbR
Ga0265800_101253	2778262406	B	6.14261	2.69933	4.24463	9.48852	12.416	12.709	16.2642	rsbT antagonist protein RsbS
Ga0265800_101254	2778262407	B	0	5.7947	4.14184	5.29071	10.535	12.1946	13.9088	serine/threonine-protein kinase RsbT
Ga0265800_101255	2778262408	B	3.29989	1.45011	1.93823	6.18964	4.49501	5.68954	7.26473	anti-sigma regulatory factor (Ser/Thr protein kinase)
Ga0265800_101256	2778262409	B	1.94179	2.04793	1.87853	1.71399	2.55972	2.87924	4.04379	signal transduction histidine kinase
Ga0265800_101257	2778262410	B	1.56975	1.31065	0.867775	0.822699	1.51748	1.75922	2.56851	PAS/PAC sensor hybrid histidine kinase
Ga0265800_101258	2778262411	B	0	0.710812	1.6766	1.42777	13.9309	1.004	24.4939	putative protease
Ga0265800_101259	2778262412	B	1.88259	0.82729	0.910628	2.07717	17.5372	1.42819	31.252	collagenase-like PrtC family protease
Ga0265800_101260	2778262413	B	0	1.53774	0.403011	0.804371	18.7077	2.01112	23.1632	channel protein (hemolysin III family)
Ga0265800_101261	2778262414	B	0	0.641286	1.76471	2.21396	7.69484	2.13868	13.35	predicted lipid carrier protein YhbT
Ga0265800_101262	2778262415	B	0	1.60402	1.05095	1.84589	5.07901	2.51736	8.23485	4-hydroxy-3-polyprenylbenzoate decarboxylase
Ga0265800_101263	2778262416	B	1.07531	0.850567	0.66875	1.3051	2.17351	1.40905	3.42299	3-octaprenyl-4-hydroxybenzoate decarboxylase
Ga0265800_101264	2778262417	B	0.821415	0.93851	0.681132	0.589106	1.44375	0.453201	2.07716	NAD(P)H-flavin reductase
Ga0265800_101265	2778262418	B	0	0.583558	0.229408	0.793654	1.55604	0.49608	1.97533	cytochrome c/quinol oxidase subunit I
Ga0265800_101266	2778262419	B	0	0.332937	0.523536	0.417971	2.33038	0.391885	3.83174	hypothetical protein
Ga0265800_101267	2778262420	B	0	0.183039	0.719561	0.517023	3.01991	0.287262	4.8947	quinol-cytochrome oxidoreductase complex cytochrome b subunit
Ga0265800_101268	2778262421	B	0	0.530759	0.834608	2.77633	8.66841	0.624733	22.8169	protein SCO1/2
Ga0265800_101269	2778262422	B	0	0.65932	1.94394	4.6559	24.2282	2.00481	49.3224	protoheme IX farnesyltransferase
Ga0265800_101270	2778262423	B	0	0.481162	1.38713	2.11419	32.5562	0.755139	43.134	cytochrome c oxidase subunit 1
Ga0265800_101271	2778262424	B	0	0.908267	1.66627	1.14025	20.8886	0.593934	43.4524	cytochrome c oxidase subunit 2
Ga0265800_101272	2778262425	B	0	3.65513	1.4369	4.58867	51.1679	1.43409	68.6675	hypothetical protein
Ga0265800_101273	2778262426	B	1.7744	1.87139	1.22613	0.78312	2.96281	1.77442	7.17924	cytochrome c oxidase assembly protein subunit 15
Ga0265800_101274	2778262427	B	0	1.40944	1.10816	3.9812	13.3886	1.38249	27.6713	uncharacterized protein (DUF2249 family)
Ga0265800_101275	2778262428	B	1.37146	0.602679	1.23201	2.53464	14.0414	1.20596	30.866	nitric oxide reductase NorZ apoprotein
Ga0265800_101276	2778262429	B	0	2.59742	1.36146	5.4347	11.2546	3.39701	23.739	uncharacterized protein DUF2249
Ga0265800_101277	2778262430	B	12.4114	1.45443	1.14353	5.70594	10.1802	3.42389	15.7543	BadM/Rrf2 family transcriptional regulator
Ga0265800_101278	2778262431	B	0	5.52683	1.18511	3.7846	7.03361	4.92832	15.3067	metal-sulfur cluster biosynthetic enzyme
Ga0265800_101279	2778262432	B	0	2.13689	1.18596	3.31388	3.89638	2.21932	6.46743	hypothetical protein
Ga0265800_101280	2778262433	B	0	1.08421	0.947164	1.36112	2.04779	0.756251	2.93602	uncharacterized protein involved in response to NO
Ga0265800_101281	2778262434	B	0.864541	1.59565	1.0156	3.00479	3.34301	3.96502	5.63272	1-acyl-sn-glycerol-3-phosphate acyltransferase
Ga0265800_101282	2778262435	B	0	2.75932	0.723162	0.866018	9.19704	2.52612	8.56189	hypothetical protein
Ga0265800_101283	2778262436	B	7.10991	9.3732	4.91306	7.06032	13.1215	10.0521	17.5562	hypothetical protein
Ga0265800_101284	2778262437	B	3.76518	3.47462	2.21152	4.7775	6.61782	5.58293	10.3053	diketogulonate reductase-like aldo/keto reductase
Ga0265800_101285	2778262438	B	3.02315	3.71981	1.25342	2.16816	3.71952	3.33594	6.11585	hypothetical protein
Ga0265800_101286	2778262439	B	93.258	28.0041	65.5167	298.831	323.047	459.061	327.383	hypothetical protein
Ga0265800_101287	2778262440	B	13.8253	12.1509	5.73211	24.4069	41.3099	68.1742	32.9044	uncharacterized protein DUF190
Ga0265800_101288	2778262441	B	15.6978	14.2565	13.0169	32.3314	48.7443	68.5662	53.8621	camphor resistance protein CrcB
Ga0265800_101289	2778262442	B	0	9.46027	13.7318	26.4937	34.9276	44.541	54.4388	hypothetical protein
Ga0265800_101290	2778262443	B	21.8561	9.12429	11.3272	31.6512	42.7368	58.4094	59.3327	SpoIIAA-like protein
Ga0265800_101291	2778262444	B	18.926	12.0595	11.1164	44.8968	49.4818	72.7682	59.8241	response regulator receiver domain-containing protein
Ga0265800_101292	2778262445	B	27.9378	7.36624	8.49439	39.4566	29.9538	78.0342	55.6872	BON domain-containing protein
Ga0265800_101293	2778262446	B	8.47619	9.5355	14.6429	37.9703	43.2045	77.5144	49.7779	Ku protein
Ga0265800_101294	2778262447	B	32.0733	8.45663	17.7305	30.5225	32.4146	88.2028	63.2147	hypothetical protein
Ga0265800_101295	2778262448	B	16.6138	8.27428	16.6466	40.1755	36.9881	94.0509	54.2866	LuxR family two component transcriptional regulator
Ga0265800_101296	2778262449	B	1.89705	2.3342	1.31089	1.88381	3.66776	3.79415	4.85361	crotonobetainyl-CoA:carnitine CoA-transferase CaiB-like acyl-CoA transferase
Ga0265800_101297	2778262450	B	1.98072	4.00389	2.60054	4.15234	7.3109	7.37656	9.31039	ubiquinone/menaquinone biosynthesis C-methylase UbiE
Ga0265800_101298	2778262451	B	2.77994	3.54271	2.68937	3.68073	4.27536	4.40962	9.88306	p-hydroxybenzoate 3-monooxygenase
Ga0265800_101299	2778262452	B	1.67228	7.34874	2.88893	4.61283	9.6996	11.0142	20.4475	sulfate transport system substrate-binding protein
Ga0265800_101300	2778262453	B	3.88358	8.53305	3.89123	3.64224	14.8464	6.69591	25.7069	sulfate transport system permease protein
Ga0265800_101301	2778262454	B	5.56297	6.8449	3.07527	2.35288	8.63696	5.4991	17.6532	sulfate transport system permease protein
Ga0265800_101302	2778262455	B	4.49904	6.72204	4.24883	3.39211	11.5979	7.75707	26.234	sulfate transport system ATP-binding protein
Ga0265800_101303	2778262456	B	14.2768	27.2913	8.13904	29.7328	26.3482	33.7233	33.2357	disulfide bond formation protein DsbB
Ga0265800_101304	2778262457	B	10.5297	12.5596	4.46966	9.87536	10.5757	9.85554	14.6785	beta-lactamase
Ga0265800_101305	2778262458	B	3.07212	5.9401	4.03348	3.0507	7.73955	4.34341	9.10914	peptide/nickel transport system substrate-binding protein
Ga0265800_101306	2778262459	B	3.66735	4.99593	0.760257	2.0232	5.1567	2.59247	7.14631	peptide/nickel transport system permease protein
Ga0265800_101307	2778262460	B	0	2.94458	1.67205	0.718793	2.29006	1.2195	3.65469	peptide/nickel transport system permease protein
Ga0265800_101308	2778262461	B	3.37888	3.4151	2.10137	0.838829	2.67249	2.03901	3.66906	peptide/nickel transport system ATP-binding protein
Ga0265800_101309	2778262462	B	3.46175	3.65099	2.27252	1.33685	3.65071	2.92463	5.97328	peptide/nickel transport system ATP-binding protein
Ga0265800_101310	2778262463	B	4.56981	2.91185	1.49996	2.96226	4.81925	3.93955	6.89959	acetylornithine deacetylase/succinyl-diaminopimelate desuccinylase-like protein
Ga0265800_101311	2778262464	B	10.6772	6.67307	2.45936	13.8751	9.90459	19.8819	16.3059	erythromycin esterase-like protein
Ga0265800_101312	2778262465	B	2.65014	12.8104	4.57821	21.7842	13.2753	43.8649	29.8022	predicted phosphoribosyltransferase
Ga0265800_101313	2778262466	B	10.3779	9.577	5.37844	22.4716	18.0125	45.2696	32.6495	dienelactone hydrolase
Ga0265800_101314	2778262467	B	0	1.7854	1.32118	2.10955	2.7304	3.17287	4.69262	N-acetylglutamate synthase
Ga0265800_101315	2778262468	B	1.33729	1.29286	1.20131	0.959084	1.29276	1.42954	2.50643	GGDEF domain-containing protein
Ga0265800_101316	2778262469	B	3.9689	4.53467	1.55412	2.4815	2.90662	4.06019	6.96643	GGDEF domain-containing protein
Ga0265800_101317	2778262470	B	1.32652	2.4483	1.2833	1.53681	1.63208	1.23505	3.31498	diguanylate cyclase with GGDEF domain
Ga0265800_101318	2778262471	B	1.52071	2.23869	1.15592	1.36329	1.63713	2.11067	2.55613	ATP-dependent helicase HrpA
Ga0265800_101319	2778262472	B	4.9797	4.37659	2.23668	3.43401	3.71982	2.48989	4.7407	Rieske Fe-S protein
Ga0265800_101320	2778262473	B	2.8036	4.06568	2.42166	2.78405	3.81898	1.93355	5.37978	methionine aminotransferase
Ga0265800_101321	2778262474	B	3.54879	5.61417	2.32966	2.9367	4.99	3.67122	6.91529	LysR family transcriptional regulator
Ga0265800_101322	2778262475	B	0	4.68438	1.22768	1.63356	1.56134	2.45057	5.81406	sirohydrochlorin cobaltochelatase
Ga0265800_101323	2778262476	B	2.98126	2.62018	1.03005	2.71376	4.06098	3.1869	5.49895	lipopolysaccharide export system permease protein
Ga0265800_101324	2778262477	B	5.96251	5.6334	2.57512	3.70058	5.10897	5.24297	7.13976	lipopolysaccharide export system permease protein
Ga0265800_101325	2778262478	B	6.32789	9.26916	4.66418	5.99284	8.61967	7.92816	12.77	aminopeptidase A
Ga0265800_101326	2778262479	B	0	4.00502	3.77868	3.51955	9.21084	4.39985	14.0992	DNA polymerase III chi subunit
Ga0265800_101327	2778262480	B	0	1.28638	3.0342	3.63359	4.50198	8.58011	10.2328	hypothetical protein
Ga0265800_101328	2778262481	B	10.1585	10.0761	6.51828	8.32633	16.3246	9.20785	25.4294	amino acid/amide ABC transporter substrate-binding protein (HAAT family)
Ga0265800_101329	2778262482	B	8.48975	17.1591	10.9739	18.1973	35.7029	30.9954	32.8527	GAF sensor hybrid histidine kinase
Ga0265800_101330	2778262483	B	6.75273	12.9249	8.45107	15.4809	23.0783	25.64	35.6476	phospho-acceptor domain-containing protein
Ga0265800_101332	2778262485	B	47.9493	60.0523	39.7604	37.6951	60.0477	59.9374	64.9056	hypothetical protein
Ga0265800_101333	2778262486	B	20.0483	27.1351	13.7151	13.3829	19.2045	10.8539	24.6926	type I restriction and modification enzyme subunit R-like protein
Ga0265800_101334	2778262487	B	9.4976	18.3641	11.8134	3.66775	10.8507	6.55016	11.3022	hypothetical protein
Ga0265800_101335	2778262488	B	20.1772	10.0489	7.43612	3.33941	5.9107	4.87042	9.0041	hypothetical protein
Ga0265800_101336	2778262489	B	5.6512	6.38038	2.4632	0.863351	1.98656	0.884418	2.4572	putative tail protein
Ga0265800_101337	2778262490	B	5.01996	3.97078	2.08132	1.10777	0.441164	0.346209	1.49344	hypothetical protein
Ga0265800_101338	2778262491	B	0	2.81187	1.76864	0.529507	1.40583	0.330973	1.33254	hypothetical protein
Ga0265800_101339	2778262492	B	0	0	0	0.901052	1.43536	0.56321	0.971809	hypothetical protein
Ga0265800_101340	2778262493	B	0	1.27998	1.00637	0.80345	0	1.50661	1.73308	hypothetical protein
Ga0265800_101341	2778262494	B	0	1.35392	0.709671	0.283287	1.57946	0.177071	1.14575	hypothetical protein
Ga0265800_101342	2778262495	B	0	1.00812	0.924724	0.316399	0.336013	0.263691	0.398119	uncharacterized protein YdaU (DUF1376 family)
Ga0265800_101343	2778262496	B	0	0	3.5292	0	1.12209	0	1.51942	CP4-57 regulatory protein AlpA
Ga0265800_101344	2778262497	B	0	2.23332	0.877963	0.420559	1.11658	0.963872	1.36075	hypothetical protein
Ga0265800_101345	2778262498	B	2.89896	1.7835	1.20194	0.31986	0.7643	1.49949	1.81113	hypothetical protein
Ga0265800_101346	2778262499	B	0	0.916161	0	1.72523	1.83218	2.5162	2.17083	hypothetical protein
Ga0265800_101347	2778262500	B	1.30549	2.18001	1.17274	1.65648	2.4093	2.92613	4.42757	integrase
Ga0265800_101348	2778262501	B	0	1.07677	0.736171	1.02853	1.26393	0.679627	1.66394	hemolysin type calcium-binding protein
Ga0265800_101349	2778262502	B	0	5.7887	1.0114	4.44106	5.14512	5.80419	7.40242	hypothetical protein
Ga0265800_101350	2778262503	B	0	2.0641	2.43432	1.29565	2.06395	0	3.49347	hypothetical protein
Ga0265800_101351	2778262504	B	122.622	124.535	179.823	485.563	312.511	611.239	514.775	stress-induced acidophilic repeat protein
Ga0265800_101352	2778262505	B	3.4382	3.98875	3.70632	6.86637	8.9438	9.38997	13.0722	ornithine decarboxylase
Ga0265800_101353	2778262506	B	0	4.99904	1.96522	4.31464	8.12283	7.11001	17.1332	hypothetical protein
Ga0265800_101354	2778262507	B	5.06143	5.67174	4.89654	3.62998	6.44972	4.84334	10.5405	histidine kinase/DNA gyrase B/HSP90-like ATPase
Ga0265800_101355	2778262508	B	8.39405	9.03733	5.36538	8.10395	10.3276	11.144	16.9188	LytTR family two component transcriptional regulator
Ga0265800_101356	2778262509	B	10.8141	10.0746	4.932	8.82959	11.0242	15.0654	16.7939	enoyl-[acyl-carrier-protein] reductase [NADH]
Ga0265800_101357	2778262510	B	1.73211	4.33864	1.97491	3.67896	3.88165	5.01723	6.02908	microcin C transport system substrate-binding protein
Ga0265800_101358	2778262511	B	1.62284	3.28047	2.13068	3.76022	2.99499	3.63746	5.02109	microcin C transport system permease protein
Ga0265800_101359	2778262512	B	1.50424	3.43736	1.55918	3.6514	3.70149	4.09783	4.65415	microcin C transport system permease protein
Ga0265800_101360	2778262513	B	2.96755	2.95589	1.23037	2.07371	3.99884	4.16145	6.56251	microcin C transport system ATP-binding protein
Ga0265800_101361	2778262514	B	0	4.3241	1.35991	4.34281	5.62091	5.42902	15.6616	ribosome-associated protein
Ga0265800_101362	2778262515	B	102.787	132.319	48.8836	37.0254	63.2319	58.3789	47.6677	ribosome maturation factor RimP
Ga0265800_101363	2778262516	B	132.187	158.058	65.3401	70.2788	94.9025	83.0778	89.181	NusA antitermination factor
Ga0265800_101364	2778262517	B	77.9945	87.7891	48.2085	47.7166	46.4202	50.4143	68.7943	translation initiation factor 2 (bIF-2)
Ga0265800_101365	2778262518	B	34.3006	48.7366	34.3682	23.9691	25.6224	21.0932	45.7501	ribosome-binding factor A
Ga0265800_101366	2778262519	B	31.5986	21.4459	15.042	14.3333	10.4907	7.20362	24.8072	tRNA pseudouridine synthase B
Ga0265800_101367	2778262520	B	30.2061	21.845	16.7579	9.66518	8.1154	7.64835	15.0714	GTP-binding protein TypA/BipA
Ga0265800_101368	2778262521	B	19.4179	12.6289	10.0635	6.1061	6.48463	4.62018	9.76286	EamA domain-containing membrane protein RarD
Ga0265800_101369	2778262522	B	13.7051	7.09331	9.04954	6.2167	5.21921	4.77849	9.24186	enoyl-CoA hydratase/carnithine racemase
Ga0265800_101370	2778262523	B	4.06898	8.2252	7.87284	3.81612	3.5759	4.34967	5.81053	SsrA-binding protein
Ga0265800_101371	2778262524	B	0	5.50546	5.87454	3.4558	5.89826	4.32015	5.19142	ribosome-associated toxin RatA of RatAB toxin-antitoxin module
Ga0265800_101372	2778262525	B	27.2718	9.58753	4.71131	4.13747	2.99588	3.52658	7.30206	hypothetical protein
Ga0265800_101373	2778262526	B	0	3.40147	3.64687	1.35871	2.78281	2.91179	5.23359	uncharacterized protein DUF4124
Ga0265800_101374	2778262527	B	6.53724	22.1201	12.7991	15.1472	21.1609	21.3778	31.3443	IMP dehydrogenase
Ga0265800_101375	2778262528	B	9.79377	16.0102	8.93329	14.318	14.2876	16.8523	17.6276	GMP synthase (glutamine-hydrolysing)
Ga0265800_101376	2778262529	B	17.9816	10.5358	9.52624	8.92807	11.5885	10.5411	13.9088	hypothetical protein
Ga0265800_101377	2778262530	B	4.27333	5.53977	4.50323	3.94884	4.60047	4.0892	6.64265	class 3 adenylate cyclase
Ga0265800_101378	2778262531	B	5.22928	4.90233	4.57711	4.61582	6.7402	10.0379	8.60829	class 3 adenylate cyclase
Ga0265800_101379	2778262532	B	5.83215	3.84435	2.41806	3.53923	3.58779	6.23446	7.63432	PaiB family negative transcriptional regulator
Ga0265800_101380	2778262533	B	0	7.53005	6.7662	8.10282	6.45384	11.3957	12.7445	hypothetical protein
Ga0265800_101381	2778262534	B	1.18921	3.86716	2.13657	2.165	3.44882	3.60868	6.4036	tRNA(adenine34) deaminase
Ga0265800_101382	2778262535	B	0	4.52926	2.41645	3.65533	6.79338	4.44266	7.66573	muramoyltetrapeptide carboxypeptidase
Ga0265800_101383	2778262536	B	0	7.75033	6.96414	12.1623	17.7137	15.2043	28.6708	hypothetical protein
Ga0265800_101384	2778262537	B	0.96353	1.10088	0.96543	1.14286	2.2016	1.21274	2.30754	Cu(I)/Ag(I) efflux system membrane protein CusA/SilA
Ga0265800_101385	2778262538	B	0	1.05594	0.691852	1.15993	4.13546	1.2429	6.55295	Cu(I)/Ag(I) efflux system membrane fusion protein
Ga0265800_101386	2778262539	B	0	0.980797	1.19955	0.684056	5.55743	1.32548	14.8292	outer membrane protein TolC
Ga0265800_101387	2778262540	B	0	1.63212	1.92485	3.07346	14.6879	1.12064	41.0208	hypothetical protein
Ga0265800_101388	2778262541	B	0.744648	0.458123	0.411651	0.616212	0.785294	0.693303	1.15198	N-methylhydantoinase A
Ga0265800_101389	2778262542	B	0	0.343623	0.27017	0.269617	0.773094	0.539285	0.668816	N-methylhydantoinase B
Ga0265800_101390	2778262543	B	1.68368	0.887859	0.581725	1.9506	1.18372	1.91594	3.15566	tripartite-type tricarboxylate transporter receptor subunit TctC
Ga0265800_101391	2778262544	B	3.58745	2.04942	0.867644	0.989563	2.52218	2.35043	3.04172	DNA-binding transcriptional LysR family regulator
Ga0265800_101392	2778262545	B	0	2.39208	0.470188	1.21999	1.79393	1.75976	2.27732	tripartite-type tricarboxylate transporter receptor subunit TctC
Ga0265800_101393	2778262546	B	2.53722	2.8989	1.05195	1.81965	2.00678	2.31852	4.03831	3-isopropylmalate/(R)-2-methylmalate dehydratase large subunit
Ga0265800_101394	2778262547	B	0	2.90726	1.52387	2.43319	2.90704	3.80222	4.15509	3-isopropylmalate/(R)-2-methylmalate dehydratase small subunit
Ga0265800_101395	2778262548	B	0	5.83812	2.15457	2.24364	3.57409	4.06698	7.0175	aspartate aminotransferase
Ga0265800_101396	2778262549	B	4.95473	10.8866	3.2526	5.46686	8.70863	9.73875	14.5193	RES domain-containing protein
Ga0265800_101397	2778262550	B	0	16.6346	7.26598	6.96106	12.321	12.5698	19.3949	helix-turn-helix protein
Ga0265800_101398	2778262551	B	7.2503	3.18609	4.00805	3.99985	9.76995	4.58359	11.0006	LuxR family transcriptional regulator/LuxR family quorum-sensing transcriptional regulator LasR
Ga0265800_101399	2778262552	B	0	7.73615	6.08247	3.99907	15.4711	4.82076	20.6413	uncharacterized protein DUF4902
Ga0265800_101400	2778262553	B	24.1852	26.0386	40.1096	38.86	71.468	31.3786	86.8811	acyl homoserine lactone synthase
Ga0265800_101401	2778262554	B	8.36334	13.9658	21.9609	24.8381	35.8919	15.9579	73.3576	response regulator receiver domain-containing protein
Ga0265800_101402	2778262555	B	8.08045	4.97126	4.09472	7.7269	5.20759	7.05889	10.0164	hypothetical protein
Ga0265800_101403	2778262556	B	2.1256	2.98906	2.64388	5.51146	3.73604	3.88477	7.77813	TatD DNase family protein
Ga0265800_101404	2778262557	B	5.92212	9.88924	3.27382	7.84108	10.4089	11.6402	18.4993	type IV pilus assembly protein PilZ
Ga0265800_101405	2778262558	B	1.64994	3.77029	1.93823	3.0038	4.49501	4.09647	6.28301	DNA polymerase-3 subunit delta'
Ga0265800_101406	2778262559	B	2.69348	4.26108	2.60573	5.49799	2.8405	6.40873	8.89459	thymidylate kinase
Ga0265800_101407	2778262560	B	3.35593	5.45654	2.0871	4.90621	7.07821	6.30692	7.08859	UPF0755 protein
Ga0265800_101408	2778262561	B	0	5.33806	4.19699	9.95063	9.38134	9.26612	18.2335	hypothetical protein
Ga0265800_101409	2778262562	B	0.687639	3.50527	1.61558	3.64183	3.80716	3.72279	6.23949	O-antigen ligase
Ga0265800_101410	2778262563	B	1.95717	4.47234	2.1639	2.69934	4.81601	3.77942	5.47326	YbgC/YbaW family acyl-CoA thioester hydrolase
Ga0265800_101411	2778262564	B	0	1.07618	0.846137	1.73706	0.461186	1.86993	3.07041	acetyl esterase
Ga0265800_101412	2778262565	B	0	4.31122	2.293	1.98983	3.42335	3.13427	6.39533	4-hydroxybutyrate dehydrogenase
Ga0265800_101413	2778262566	B	0	3.34567	1.1129	2.26163	2.70207	2.8778	6.53366	peptidoglycan/LPS O-acetylase OafA/YrhL
Ga0265800_101414	2778262567	B	1.51346	3.59143	2.50998	4.42522	4.92122	6.47145	9.32031	hypothetical protein
Ga0265800_101415	2778262568	B	0.652232	2.63689	1.03661	2.84261	2.75133	3.75601	3.78377	uncharacterized protein
Ga0265800_101416	2778262569	B	3.19936	6.46731	8.17998	73.2485	52.8592	152.799	77.668	hypothetical protein
Ga0265800_101417	2778262570	B	13.8758	2.74393	4.31478	28.3236	31.7053	79.7871	44.2736	methylated-DNA-[protein]-cysteine S-methyltransferase
Ga0265800_101418	2778262571	B	5.22928	5.66832	5.42026	18.3671	23.1311	45.5615	29.2993	glutathione S-transferase
Ga0265800_101419	2778262572	B	6.7618	3.65061	1.869	7.94033	10.3568	10.3261	14.7425	putative acyl-CoA dehydrogenase
Ga0265800_101420	2778262573	B	4.90072	4.16361	1.01594	4.50606	8.18302	5.35144	6.51227	hypothetical protein
Ga0265800_101421	2778262574	B	4.64257	5.30438	1.92485	3.84182	5.30398	8.32473	7.3202	uncharacterized protein (TIGR00369 family)
Ga0265800_101422	2778262575	B	0	2.48201	1.351	5.39296	5.91818	4.34473	6.85048	gluconate 5-dehydrogenase
Ga0265800_101423	2778262576	B	0	2.10762	1.02854	1.59668	3.77889	3.36474	5.04317	butyryl-CoA dehydrogenase
Ga0265800_101424	2778262577	B	1.38997	4.27568	2.30517	3.83409	5.7412	6.4227	9.55225	acetyl-CoA C-acetyltransferase
Ga0265800_101425	2778262578	B	0.741296	5.92879	1.69041	4.29407	5.79804	5.49589	9.79182	3-hydroxyacyl-CoA dehydrogenase
Ga0265800_101426	2778262579	B	0	2.40713	1.03232	1.23624	2.40694	2.31817	3.99996	amino acid/amide ABC transporter ATP-binding protein 2 (HAAT family)
Ga0265800_101427	2778262580	B	2.00483	4.93365	0.969758	1.54844	2.46664	2.90359	3.87686	amino acid/amide ABC transporter ATP-binding protein 1 (HAAT family)
Ga0265800_101428	2778262581	B	1.12682	4.75365	1.5573	1.67844	4.35719	3.73021	5.33015	amino acid/amide ABC transporter membrane protein 2 (HAAT family)
Ga0265800_101429	2778262582	B	0	7.14799	1.58827	1.85325	6.21517	3.2313	11.4667	amino acid/amide ABC transporter membrane protein 1 (HAAT family)
Ga0265800_101430	2778262583	B	0	12.0602	3.13173	4.306	11.5061	4.2543	18.9511	amino acid/amide ABC transporter substrate-binding protein (HAAT family)
Ga0265800_101431	2778262584	B	0.97551	2.40061	0.674092	1.88359	3.34346	2.5229	4.93366	fatty-acyl-CoA synthase
Ga0265800_101432	2778262585	B	0	7.55759	2.64092	6.85235	7.55702	8.23676	13.0754	peptide-methionine (R)-S-oxide reductase
Ga0265800_101433	2778262586	B	6.79477	5.07605	2.58241	6.74738	6.86708	9.02077	10.4105	intracellular septation protein A
Ga0265800_101434	2778262587	B	9.16504	10.4715	5.06654	19.2135	4.83265	15.486	8.99781	BolA protein
Ga0265800_101435	2778262588	B	6.63369	22.5437	8.09836	37.2067	18.0724	30.2714	23.0903	peptidyl-prolyl cis-trans isomerase C
Ga0265800_101436	2778262589	B	7.40596	9.76349	3.58234	8.37573	5.53223	16.2167	8.70296	hemerythrin HHE cation binding domain-containing protein
Ga0265800_101437	2778262590	B	5.09673	4.53544	1.67291	6.99427	5.03899	11.2261	8.58595	catalase
Ga0265800_101438	2778262591	B	0	2.48802	0.652059	1.43159	1.65855	2.1964	3.36875	uncharacterized membrane protein
Ga0265800_101439	2778262592	B	5.18893	4.33245	2.8685	1.43131	3.6481	1.87878	4.78551	hypothetical protein
Ga0265800_101440	2778262593	B	0	4.56912	4.10562	2.86805	3.26341	3.5854	8.17508	uncharacterized protein (TIGR00106 family)
Ga0265800_101441	2778262594	B	6.19035	3.44572	1.28329	0.796855	2.35742	0.64039	3.49911	uncharacterized membrane protein
Ga0265800_101442	2778262595	B	6.12333	4.64172	2.32722	4.89828	5.65037	6.99442	8.19764	putative protease
Ga0265800_101443	2778262596	B	11.5282	14.8385	5.88469	8.7192	10.4254	10.7461	17.624	phosphoribosylformylglycinamidine synthase
Ga0265800_101444	2778262597	B	4.26957	3.56484	1.91772	5.18196	4.1274	6.25722	10.7967	methionine aminopeptidase type I
Ga0265800_101445	2778262598	B	2.35687	2.33035	1.38434	3.28311	3.83184	3.45409	5.53927	UTP--GlnB (protein PII) uridylyltransferase GlnD
Ga0265800_101446	2778262599	B	2.58091	2.04149	2.31848	2.56291	32.6614	2.49195	62.424	hypothetical protein
Ga0265800_101447	2778262600	B	3.44477	1.21102	3.0945	3.42074	28.1541	4.75147	72.9673	peptide deformylase
Ga0265800_101448	2778262601	B	0	3.96841	2.18409	6.72567	16.6661	4.51534	43.6572	hypothetical protein
Ga0265800_101449	2778262602	B	0.710383	2.18521	1.76719	2.23385	3.80822	2.05769	7.35462	DNA ligase (NAD+)
Ga0265800_101450	2778262603	B	3.12259	2.46996	0.863102	3.01467	3.70466	2.74576	5.4345	ZipA-like protein with FtsZ-binding domain
Ga0265800_101451	2778262604	B	2.17545	2.75325	1.50327	2.90438	3.17364	3.97589	5.09994	condensin subunit Smc
Ga0265800_101452	2778262605	B	0	3.66803	1.1798	1.46519	3.50104	3.27082	3.83774	uncharacterized protein YecE (DUF72 family)
Ga0265800_101453	2778262606	B	4.13714	3.63607	0.571765	3.88004	2.90864	3.99453	7.38482	DNA-binding MarR family transcriptional regulator
Ga0265800_101454	2778262607	B	4.13714	0.363607	1.42941	0	1.09074	0.855972	0.861562	tripartite tricarboxylate transporter TctB family protein
Ga0265800_101455	2778262608	B	2.12746	2.15027	0.220517	0.528156	1.77617	0.696938	3.19626	TctA family transporter
Ga0265800_101456	2778262609	B	1.35564	1.90632	0.749414	1.72012	2.02532	2.57108	3.91205	succinyldiaminopimelate aminotransferase
Ga0265800_101457	2778262610	B	2.0721	1.63903	1.43186	2.40059	4.55252	3.42974	6.16453	2,3,4,5-tetrahydropyridine-2-carboxylate N-succinyltransferase
Ga0265800_101458	2778262611	B	5.63921	3.22154	1.36387	2.25551	2.72572	2.72242	4.8233	twitching motility protein PilU
Ga0265800_101459	2778262612	B	2.64593	1.86038	1.37128	1.09478	3.25541	1.1405	3.34546	succinyldiaminopimelate desuccinylase
Ga0265800_101460	2778262613	B	0	1.36529	0.939263	1.17837	1.70648	1.60702	3.52387	[LSU ribosomal protein L3P]-glutamine N5-methyltransferase
Ga0265800_101461	2778262614	B	0	1.91324	0.644686	1.07228	0.956549	1.39409	2.12792	ATP-binding cassette subfamily F protein 3
Ga0265800_101462	2778262615	B	0	3.68445	1.20703	0.963644	3.37716	2.65027	5.30051	hypothetical protein
Ga0265800_101463	2778262616	B	10.2482	4.05314	0.354082	5.08834	4.05283	4.41737	13.4149	hypothetical protein
Ga0265800_101464	2778262617	B	0	4.02611	1.05516	0.842403	3.01936	1.44801	3.29351	hypothetical protein
Ga0265800_101465	2778262618	B	3.42575	3.16138	1.18362	1.79542	1.9569	2.59888	4.33144	recombination associated protein RdgC
Ga0265800_101466	2778262619	B	0	8.38216	0.941484	6.01316	5.98681	5.63787	12.9707	hypothetical protein
Ga0265800_101467	2778262620	B	9.0062	13.4562	4.35639	4.96854	8.70631	8.07464	19.0234	uncharacterized protein DUF4242
Ga0265800_101468	2778262621	B	0	2.50325	0	3.1426	5.00612	6.38401	10.5918	hypothetical protein
Ga0265800_101469	2778262622	B	4.62969	3.05173	1.59959	3.95887	4.47553	7.82269	6.12915	glyoxylase-like metal-dependent hydrolase (beta-lactamase superfamily II)
Ga0265800_101470	2778262623	B	0	3.38589	2.36633	1.18074	1.88091	0.44282	4.83916	organic hydroperoxide reductase OsmC/OhrA
Ga0265800_101471	2778262624	B	3.52519	3.71789	1.78637	2.20408	2.06534	1.45872	4.22995	dihydrolipoamide dehydrogenase
Ga0265800_101472	2778262625	B	2.013	3.36148	1.25191	1.22159	1.76906	0.902392	2.15593	thiol:disulfide interchange protein DsbC
Ga0265800_101473	2778262626	B	4.14421	3.27806	1.57504	1.25745	0.728402	1.00034	3.08227	thiol-disulfide isomerase/thioredoxin
Ga0265800_101474	2778262627	B	4.34552	10.541	2.76259	3.40422	4.12444	3.92601	6.283	thiol:disulfide interchange protein DsbD
Ga0265800_101475	2778262628	B	8.03664	24.9569	8.51527	19.2125	14.1255	19.7686	23.2715	DNA-binding response OmpR family regulator
Ga0265800_101476	2778262629	B	5.94603	20.381	5.50579	13.5149	12.1231	14.5987	20.3076	signal transduction histidine kinase
Ga0265800_101478	2778262631	B	6.60413	11.4151	5.93262	14.8164	13.9292	12.9807	23.3804	tRNA A37 threonylcarbamoyladenosine dehydratase
Ga0265800_101479	2778262632	B	2.14405	14.8866	8.00048	18.4522	20.5381	24.4721	36.8044	tol-pal system protein YbgF
Ga0265800_101480	2778262633	B	3.49349	12.5885	5.55232	16.9601	14.1227	23.0092	31.8031	peptidoglycan-associated lipoprotein
Ga0265800_101481	2778262634	B	5.0485	8.87411	5.05846	13.0206	11.8682	17.757	25.3827	TolB protein
Ga0265800_101482	2778262635	B	4.04247	3.01994	1.25703	4.23729	4.97365	4.80922	8.59888	GT2 family glycosyltransferase
Ga0265800_101483	2778262636	B	0	2.78307	1.09408	2.24607	2.58409	2.65186	4.77761	glycosyltransferase involved in cell wall biosynthesis
Ga0265800_101484	2778262637	B	0.91583	3.38062	1.39227	2.93042	3.13891	3.18966	5.72167	lipid A export permease/ATP-binding protein MsbA
Ga0265800_101485	2778262638	B	1.32724	2.50797	0.825431	1.83054	1.57465	1.57899	4.10651	ADP-heptose:LPS heptosyltransferase
Ga0265800_101486	2778262639	B	1.08714	2.67533	1.12685	1.79926	2.48404	2.43673	4.26922	RNAse G
Ga0265800_101487	2778262640	B	4.6891	4.43027	2.51118	3.16893	3.91483	3.92111	8.68395	PAS domain S-box-containing protein
Ga0265800_101488	2778262641	B	0	6.44529	2.63512	2.91293	5.15585	4.75419	9.7741	septum formation protein
Ga0265800_101489	2778262642	B	4.13714	5.81772	1.42941	3.6518	5.4537	5.42115	10.708	23S rRNA (pseudouridine1915-N3)-methyltransferase
Ga0265800_101490	2778262643	B	5.32886	6.79102	2.57763	3.23381	3.51233	4.31827	9.35352	ribosome-associated protein
Ga0265800_101491	2778262644	B	0	3.51871	1.48968	1.699	2.16519	3.29213	5.58889	nicotinate-nucleotide adenylyltransferase
Ga0265800_101492	2778262645	B	0	4.85278	2.28927	2.63996	3.23494	3.6176	6.07783	coproporphyrinogen oxidase
Ga0265800_101493	2778262646	B	2.48614	6.7736	2.57694	4.66329	6.11763	5.74392	7.65516	phosphoribosylamine--glycine ligase
Ga0265800_101494	2778262647	B	12.1432	11.0994	4.69905	5.35935	8.11051	6.53232	7.73102	YebC/PmpR family DNA-binding regulatory protein
Ga0265800_101495	2778262648	B	1.04351	1.65083	0.721081	2.01489	2.29264	2.05107	3.9737	hypothetical protein
Ga0265800_101496	2778262649	B	0	3.13323	1.40052	1.40849	2.28589	3.41345	4.81056	hypothetical protein
Ga0265800_101497	2778262650	B	4.66042	3.22162	0.442432	1.98801	3.64741	3.63874	5.11916	RNA polymerase sigma factor (sigma-70 family)
Ga0265800_101498	2778262651	B	5.19292	3.78136	1.44284	2.9129	2.32774	2.88592	4.23012	RNA polymerase sigma-70 factor (ECF subfamily)
Ga0265800_101499	2778262652	B	0	2.18314	0.572157	0.913577	1.45532	2.56968	1.72431	uncharacterized membrane protein
Ga0265800_101500	2778262653	B	0	0.707679	0.695507	1.11053	0.176906	0.555318	1.73672	hypothetical protein
Ga0265800_101501	2778262654	B	0	0.980487	0.308359	0.615456	0.196083	0.692452	1.12844	putative DNA-binding protein
Ga0265800_101502	2778262655	B	0	1.41878	0.278876	0.222644	0.354669	0.695828	0.480255	putative oxidoreductase
Ga0265800_101503	2778262656	B	0	2.84587	1.34252	2.28655	4.09774	3.12643	5.5102	GTP cyclohydrolase II
Ga0265800_101504	2778262657	B	2.55691	3.70794	1.76687	2.75067	4.60648	3.65908	9.31839	uncharacterized protein DUF1688
Ga0265800_101505	2778262658	B	0	6.25945	2.36229	4.40057	5.75826	6.58183	11.0178	uracil phosphoribosyltransferase
Ga0265800_101506	2778262659	B	4.16991	3.29839	1.63283	2.83723	3.29814	3.73859	7.89818	hypothetical protein
Ga0265800_101507	2778262660	B	4.37938	2.56599	1.51311	1.77175	2.18092	1.9632	3.21375	HupE/UreJ protein
Ga0265800_101508	2778262661	B	2.55691	1.34834	0.971776	0.84636	2.35942	2.16018	3.42308	cytosine deaminase
Ga0265800_101509	2778262662	B	0	1.01121	0.795053	2.53896	3.0334	2.3805	7.53043	hypothetical protein
Ga0265800_101510	2778262663	B	2.35906	3.11002	0.978088	2.6029	2.90247	3.09123	6.17605	acetyltransferase (GNAT) family protein
Ga0265800_101511	2778262664	B	0	2.93732	1.42965	2.01937	3.49655	4.11594	6.48647	nitronate monooxygenase
Ga0265800_101512	2778262665	B	2.08083	2.56034	0.431366	1.49234	2.01154	2.00911	2.90954	uncharacterized protein
Ga0265800_101513	2778262666	B	3.7367	2.95572	2.3239	2.57683	3.11969	3.99446	4.3911	hypothetical protein
Ga0265800_101514	2778262667	B	0	2.91742	1.45968	2.33071	3.04979	3.22584	6.0599	23S rRNA (adenine2503-C2)-methyltransferase
Ga0265800_101515	2778262668	B	0	1.45751	0.337046	0.914888	2.22897	1.07644	2.58292	pyruvate phosphate dikinase
Ga0265800_101516	2778262669	B	0.809304	2.63176	1.23033	1.38408	1.49359	1.31165	2.88923	uncharacterized protein Yka (UPF0111/DUF47 family)
Ga0265800_101517	2778262670	B	0	2.93353	2.30646	2.25059	3.25923	2.42984	5.62696	ketopantoate reductase
Ga0265800_101518	2778262671	B	2.2312	4.31414	1.85015	2.46182	4.31382	2.00042	6.04045	sulfite exporter TauE/SafE
Ga0265800_101519	2778262672	B	3.97086	3.48994	1.64636	3.94317	10.818	6.70949	14.2942	predicted RNA-binding protein with PUA-like domain
Ga0265800_101520	2778262673	B	3.81744	3.01958	1.84654	4.84382	9.05807	6.84516	13.4012	hypothetical protein
Ga0265800_101521	2778262674	B	22.5329	29.5893	10.991	39.7059	33.7222	61.3836	45.249	ATP-dependent Clp protease ATP-binding subunit ClpA
Ga0265800_101522	2778262675	B	5.71677	8.54146	3.95037	11.9846	17.0816	23.8531	20.4089	ATP-dependent Clp protease adaptor protein ClpS
Ga0265800_101523	2778262676	B	40.9077	20.9727	13.1917	32.7236	36.5497	48.4317	39.1471	CspA family cold shock protein
Ga0265800_101524	2778262677	B	3.71847	4.33024	2.50528	4.10281	4.8201	3.8788	6.4439	Kef-type potassium/proton antiporter (CPA2 family)
Ga0265800_101525	2778262678	B	7.7713	6.37475	2.14803	8.93182	9.33375	9.91525	11.9837	isocitrate dehydrogenase (NADP)
Ga0265800_101526	2778262679	B	15.2392	22.769	6.31832	16.8144	26.7851	13.6629	20.4016	hypothetical protein
Ga0265800_101527	2778262680	B	0	3.4456	2.40806	2.64344	9.9532	10.3645	7.77552	hypothetical protein
Ga0265800_101528	2778262681	B	3.11857	6.02991	4.30996	9.8066	12.333	14.8403	16.0506	Fe-Mn family superoxide dismutase
Ga0265800_101529	2778262682	B	0	5.27061	2.07198	3.51516	3.40368	6.50537	8.17708	exodeoxyribonuclease VII large subunit
Ga0265800_101530	2778262683	B	0	2.97028	1.75151	2.95206	2.47505	3.98176	4.44066	biopolymer transport protein ExbB
Ga0265800_101531	2778262684	B	0	2.8562	2.88728	2.56122	4.89598	4.64264	9.66819	biopolymer transport protein ExbD
Ga0265800_101532	2778262685	B	1.67796	2.65453	1.27545	2.40682	3.09672	4.16604	5.8406	lipid-A-disaccharide kinase
Ga0265800_101533	2778262686	B	27.8563	8.56887	3.84982	7.68388	14.6884	9.12546	17.8176	hypothetical protein
Ga0265800_101534	2778262687	B	2.26185	4.57219	2.50076	4.1178	7.15593	4.36777	14.1983	3-deoxy-manno-octulosonate cytidylyltransferase (CMP-KDO synthetase)
Ga0265800_101535	2778262688	B	13.5413	7.85481	2.80716	7.17163	8.09222	11.767	14.7445	adenylate kinase
Ga0265800_101536	2778262689	B	1.89705	5.50205	2.88395	6.69801	4.50134	6.54163	13.1499	L-asparaginase
Ga0265800_101537	2778262690	B	0	5.76111	1.99303	4.48418	4.60854	7.50446	8.19052	SOS-response transcriptional repressor LexA
Ga0265800_101538	2778262691	B	0	6.43189	2.0228	2.82613	3.85884	8.83247	8.92644	hypothetical protein
Ga0265800_101539	2778262692	B	3.62154	2.54634	1.50152	3.39649	4.45575	7.24318	6.03351	hypothetical protein
Ga0265800_101540	2778262693	B	0	3.77029	1.36816	2.2756	3.045	3.47062	4.85951	D-3-phosphoglycerate dehydrogenase
Ga0265800_101541	2778262694	B	1.33368	3.28203	1.10591	0.956495	0.937652	2.11552	3.72965	predicted MFS family arabinose efflux permease
Ga0265800_101542	2778262695	B	2.10033	4.79947	2.32217	2.37536	3.41475	3.40403	4.43644	3-hydroxybutyryl-CoA dehydrogenase
Ga0265800_101543	2778262696	B	0	1.55474	1.68079	1.34188	2.1376	1.67751	4.47333	enoyl-CoA hydratase/carnithine racemase
Ga0265800_101544	2778262697	B	0	2.77486	2.01388	5.22537	5.97616	4.10364	6.71949	Crp/Fnr family transcriptional regulator
Ga0265800_101545	2778262698	B	1.51346	2.79334	1.7779	3.08931	5.58625	2.19194	8.01457	aminoglycoside phosphotransferase (APT) family kinase protein
Ga0265800_101546	2778262699	B	2.61097	4.36002	1.89443	3.16893	5.73643	3.3763	9.3212	acyl-CoA dehydrogenase
Ga0265800_101547	2778262700	B	2.48985	4.59542	1.37642	3.43401	5.0327	3.6919	9.92583	hypothetical protein
Ga0265800_101548	2778262701	B	0	3.79665	2.80948	2.24298	2.67978	2.80399	6.0478	GST-like protein
Ga0265800_101549	2778262702	B	0.985237	2.16478	0.544651	1.41319	2.07803	2.41217	5.07079	O-succinylbenzoic acid--CoA ligase
Ga0265800_101550	2778262703	B	2.72318	2.87204	0.376352	1.20186	1.43591	1.97199	3.56466	amino acid/amide ABC transporter ATP-binding protein 2 (HAAT family)
Ga0265800_101551	2778262704	B	0	3.31867	0.306973	0.735226	2.34241	0.765932	1.91632	amino acid/amide ABC transporter ATP-binding protein 1 (HAAT family)
Ga0265800_101552	2778262705	B	0	2.96965	0.933943	0.466016	2.96943	0.524317	3.01566	amino acid/amide ABC transporter membrane protein 2 (HAAT family)
Ga0265800_101553	2778262706	B	0	3.04486	1.12658	0.562138	1.97005	1.47575	5.03213	amino acid/amide ABC transporter membrane protein 1 (HAAT family)
Ga0265800_101554	2778262707	B	1.21554	3.73913	1.34393	0.536473	3.0979	0.922148	4.15869	amino acid/amide ABC transporter substrate-binding protein (HAAT family)
Ga0265800_101555	2778262708	B	0	1.99157	0.963602	1.05779	0.459559	0.901612	2.69657	peptidase M10/serralysin-like protein
Ga0265800_101556	2778262709	B	1.32652	2.4483	1.46663	1.68317	2.09839	2.4701	4.6173	GGDEF domain-containing protein
Ga0265800_101557	2778262710	B	0	1.79589	2.11801	2.39549	3.36705	3.87542	3.72343	hypothetical protein
Ga0265800_101558	2778262711	B	1.72483	2.57708	2.97971	0.856401	3.18322	1.48695	2.10387	uncharacterized protein YbaP (TraB family)
Ga0265800_101559	2778262712	B	0	2.54158	1.19897	1.91443	11.1821	4.38764	4.30159	hypothetical protein
Ga0265800_101560	2778262713	B	0	2.58209	2.72336	0.79063	2.45595	1.16135	2.30233	colicin V processing peptidase
Ga0265800_101561	2778262714	B	1.28511	4.06607	4.44015	3.19036	4.96926	2.79183	4.51139	membrane fusion protein
Ga0265800_101564	2778262717	B	0	5.05076	8.56513	5.78128	8.41729	4.23534	12.0012	benzoyl-CoA 2,3-dioxygenase component B
Ga0265800_101565	2778262718	B	2.81	9.05546	16.6344	9.9731	16.4632	5.49089	34.9996	benzoyl-CoA-dihydrodiol lyase
Ga0265800_101566	2778262719	B	7.38955	21.1074	34.0845	20.8929	43.835	16.6267	86.562	shikimate kinase
Ga0265800_101567	2778262720	B	0	6.49057	3.96911	3.62148	9.73512	4.38579	12.2058	flavodoxin-like protein
Ga0265800_101568	2778262721	B	2.00242	4.75174	4.08193	4.5845	5.71925	4.31563	13.5527	benzoate-CoA ligase
Ga0265800_101569	2778262722	B	1.37069	5.66198	2.93621	2.79787	5.54109	3.59219	12.1519	amino acid/amide ABC transporter substrate-binding protein (HAAT family)
Ga0265800_101570	2778262723	B	1.96496	4.31744	1.62938	1.84285	3.10832	1.6262	5.49503	amino acid/amide ABC transporter membrane protein 1 (HAAT family)
Ga0265800_101571	2778262724	B	0	1.56892	1.12141	0.89529	0.99833	0.783452	1.44839	amino acid/amide ABC transporter membrane protein 2 (HAAT family)
Ga0265800_101572	2778262725	B	0	1.62759	0.799796	1.27705	2.23776	1.67629	2.68581	amino acid/amide ABC transporter ATP-binding protein 1 (HAAT family)
Ga0265800_101573	2778262726	B	4.8573	1.7076	1.17476	1.07187	1.70747	1.59121	3.61263	amino acid/amide ABC transporter ATP-binding protein 2 (HAAT family)
Ga0265800_101574	2778262727	B	2.24133	0.787948	1.85855	0.741898	2.56064	2.24136	5.06766	methyltransferase family protein
Ga0265800_101575	2778262728	B	0	1.00488	0.395037	0.630766	3.01441	1.57706	5.10224	predicted peroxiredoxin
Ga0265800_101576	2778262729	B	0	7.89939	4.22335	7.73523	10.4264	8.67815	15.2949	uncharacterized protein DUF4395
Ga0265800_101577	2778262730	B	0	12.3439	4.04386	8.71686	11.8287	6.25574	13.0575	hypothetical protein
Ga0265800_101578	2778262731	B	4.7315	12.0595	4.90431	5.48158	7.06883	4.56841	9.99415	histidine kinase/DNA gyrase B/HSP90-like ATPase
Ga0265800_101579	2778262732	B	0	4.32724	2.10615	3.75098	3.19368	3.07221	5.75442	DNA-binding NtrC family response regulator
Ga0265800_101580	2778262733	B	1.63198	6.02415	2.14267	6.70745	6.81251	5.57131	11.3368	1,4-alpha-glucan branching enzyme
Ga0265800_101581	2778262734	B	4.99743	6.58826	2.67631	7.03031	7.46613	5.98838	14.0125	glucose-1-phosphate adenylyltransferase
Ga0265800_101582	2778262735	B	4.13735	5.81802	2.23953	7.83658	6.18118	5.3501	13.0882	glycogen operon protein
Ga0265800_101583	2778262736	B	3.45816	2.7354	1.67275	4.72181	4.02681	2.92159	8.95063	maltooligosyl trehalose hydrolase
Ga0265800_101584	2778262737	B	2.08893	2.04576	1.29914	2.22253	2.72747	2.2639	5.49548	maltooligosyl trehalose synthase
Ga0265800_101585	2778262738	B	1.09924	1.8356	1.21534	1.51607	1.83546	1.13716	3.53186	glycogen synthase (ADP-glucose)
Ga0265800_101586	2778262739	B	0	2.62638	0.996879	1.19381	1.63004	0.746198	3.31085	Ig-like domain-containing protein
Ga0265800_101587	2778262740	B	3.51096	3.39431	0.606532	1.35585	0.771375	0.786951	2.55906	LysR family transcriptional regulator
Ga0265800_101588	2778262741	B	13.9229	61.4279	5.1953	20.5851	26.9186	61.8377	39.1841	FMN-dependent NADH-azoreductase
Ga0265800_101589	2778262742	B	0	25.3294	6.22342	12.9182	24.536	23.2922	29.4729	Fe-S cluster biosynthesis and repair protein YggX
Ga0265800_101590	2778262743	B	5.17819	16.1562	3.28002	7.85593	8.41878	12.2612	16.9713	tRNA 5-methylaminomethyl-2-thiouridine biosynthesis bifunctional protein
Ga0265800_101591	2778262744	B	4.26957	10.5069	3.39289	5.65305	9.75567	7.06697	15.2424	response regulator receiver domain-containing protein
Ga0265800_101592	2778262745	B	2.61191	7.34582	2.226	3.17006	9.18158	5.40402	21.835	sulfite reductase (NADPH) hemoprotein beta-component
Ga0265800_101593	2778262746	B	0	10.2258	4.75086	6.71053	23.2387	11.8539	47.9877	uncharacterized protein DUF934
Ga0265800_101594	2778262747	B	1.97281	9.01613	4.77133	4.35343	17.6841	8.63965	41.5534	phosphoadenylylsulfate reductase (thioredoxin)
Ga0265800_101595	2778262748	B	5.40079	8.54401	3.98083	5.36311	18.8271	11.4225	35.9374	sulfate adenylyltransferase subunit 2
Ga0265800_101596	2778262749	B	2.41918	9.88675	4.42997	7.07345	16.7956	13.2222	40.1597	sulfate adenylyltransferase subunit 1
Ga0265800_101597	2778262750	B	6.72573	13.5956	7.43612	13.3576	22.4607	19.9455	31.2142	ferredoxin
Ga0265800_101598	2778262751	B	5.98056	19.0538	7.12883	20.1261	22.9943	20.5713	46.927	thioredoxin reductase (NADPH)
Ga0265800_101600	2778262753	B	3.54204	5.39595	3.34506	4.88519	5.81059	4.23422	6.04156	hypothetical protein
Ga0265800_101601	2778262754	B	0	2.94758	1.90853	1.74137	4.16098	2.31298	5.45828	small conductance mechanosensitive channel
Ga0265800_101602	2778262755	B	0	3.13693	3.20629	1.57525	5.0187	1.96925	3.92882	Lrp/AsnC family leucine-responsive transcriptional regulator
Ga0265800_101603	2778262756	B	7.42107	8.58766	6.15369	20.8797	16.4132	24.9505	20.7163	glycine/D-amino acid oxidase-like deaminating enzyme
Ga0265800_101604	2778262757	B	27.5354	9.68018	4.75684	14.2793	16.939	16.2366	24.1658	hypothetical protein
Ga0265800_101605	2778262758	B	3.99027	8.41678	5.88232	7.63136	25.5991	12.659	34.8615	putative redox protein
Ga0265800_101606	2778262759	B	23.489	37.7947	17.8544	27.7111	86.5401	56.0753	137.771	thiosulfate/3-mercaptopyruvate sulfurtransferase
Ga0265800_101607	2778262760	B	13.8331	31.7451	22.9412	34.3414	104.143	87.9286	168.135	hypothetical protein
Ga0265800_101608	2778262761	B	0	52.3862	35.131	77.3719	211.07	192.239	286.33	hypothetical protein
Ga0265800_101609	2778262762	B	20.4539	68.9104	45.6997	81.6209	188.141	203.836	166.122	cytochrome c
Ga0265800_101610	2778262763	B	1.50289	2.31152	1.09044	0.912026	1.51888	1.50291	3.04036	thiosulfate dehydrogenase
Ga0265800_101611	2778262764	B	0	2.11929	1.66627	3.80082	4.54099	4.63268	4.50922	sulfopyruvate decarboxylase alpha subunit
Ga0265800_101612	2778262765	B	0	4.03489	2.11493	1.85733	5.11047	3.58835	5.73637	thiamine pyrophosphate-dependent enzyme
Ga0265800_101613	2778262766	B	0	3.59626	0.685459	2.53101	3.59598	3.20681	3.98397	nickel-dependent lactate racemase
Ga0265800_101614	2778262767	B	1.22458	3.65931	0.846204	2.43208	2.79808	2.36474	4.80895	hypothetical protein
Ga0265800_101615	2778262768	B	6.46019	4.35296	3.57127	3.20756	3.02792	3.19301	7.55953	uncharacterized protein
Ga0265800_101616	2778262769	B	2.70825	11.9012	2.62002	8.06808	9.99627	9.89926	26.9106	hypothetical protein
Ga0265800_101617	2778262770	B	8.69689	11.4654	5.40872	12.9543	12.7383	15.1948	31.3068	uncharacterized protein DUF937
Ga0265800_101618	2778262771	B	6.72573	0.591115	1.39427	1.48418	2.95535	2.08732	4.402	branched-subunit amino acid transport protein
Ga0265800_101619	2778262772	B	0	0.829339	0.489044	1.69188	1.86587	1.78966	3.86003	predicted branched-subunit amino acid permease
Ga0265800_101620	2778262773	B	1.28915	6.51934	1.7264	3.36833	6.67923	3.53639	7.83212	ribonucleoside-diphosphate reductase class II
Ga0265800_101621	2778262774	B	14.5637	8.95987	17.1083	66.6863	85.7522	194.352	134.747	hypothetical protein
Ga0265800_101622	2778262775	B	0	12.2412	13.4744	43.7981	72.2179	132.079	92.4031	hypothetical protein
Ga0265800_101623	2778262776	B	19.3089	13.5763	9.33993	59.6532	33.9381	93.2168	74.6776	hypothetical protein
Ga0265800_101624	2778262777	B	7.04901	5.69966	5.94259	17.6552	27.8766	31.9884	34.2245	alpha/beta hydrolase family protein
Ga0265800_101625	2778262778	B	5.9034	3.83943	2.52919	5.53654	8.61212	5.61849	16.0523	hypothetical protein
Ga0265800_101626	2778262779	B	1.68368	0.591906	1.04711	1.20751	1.33169	0.928942	2.55458	response regulator receiver domain-containing protein
Ga0265800_101627	2778262780	B	2.63982	0.541357	0.486442	0.485446	1.39196	0.75858	1.49217	signal transduction histidine kinase
Ga0265800_101628	2778262781	B	0	0.739953	0.363613	0.522531	0.369949	0.653224	0.970581	respiratory nitrite reductase (cytochrome ammonia-forming) precursor
Ga0265800_101629	2778262782	B	0	2.2612	0.253978	0.405532	0.646008	0.506963	1.85886	respiratory nitrite reductase-specific menaquinol--cytochrome-c reductase (NrfH) precursor
Ga0265800_101630	2778262783	B	0.722856	3.17654	1.29871	2.31296	3.62098	3.21551	5.61282	signal transduction histidine kinase
Ga0265800_101631	2778262784	B	3.71054	3.36984	1.11108	2.31997	2.9348	3.02818	6.29217	metallo-beta-lactamase superfamily protein
Ga0265800_101632	2778262785	B	3.97738	4.19479	2.19874	6.25359	5.76741	8.64063	14.2585	3-hydroxyisobutyrate dehydrogenase-like beta-hydroxyacid dehydrogenase
Ga0265800_101633	2778262786	B	5.90183	5.44639	3.46652	6.34905	4.66798	11.6003	16.2412	CBS domain protein
Ga0265800_101634	2778262787	B	6.81796	5.39299	1.88452	7.14653	9.5868	4.06816	11.3588	cytochrome c
Ga0265800_101635	2778262788	B	0	2.57165	3.23509	4.51985	4.11432	4.64135	8.35677	hypothetical protein
Ga0265800_101636	2778262789	B	0	3.0092	1.18298	4.72221	7.52242	4.13232	6.11164	hypothetical protein
Ga0265800_101637	2778262790	B	1.70695	4.05059	1.41544	1.97756	4.95035	3.29623	4.92586	tripartite-type tricarboxylate transporter receptor subunit TctC
Ga0265800_101638	2778262791	B	2.58458	1.89296	0.714393	1.3308	1.74139	1.93103	2.4349	hypothetical protein
Ga0265800_101639	2778262792	B	1.62819	2.71889	1.35013	2.06595	2.71868	2.69497	4.3595	6-phosphogluconate dehydrogenase (decarboxylating)
Ga0265800_101640	2778262793	B	0	2.26947	0.823546	1.47935	2.2693	2.26033	2.30464	hypothetical protein
Ga0265800_101641	2778262794	B	0	0.926696	0	1.16338	0.231656	2.99962	2.5879	GntR family transcriptional regulator
Ga0265800_101642	2778262795	B	0	0.682644	0.402541	0.856997	0.341296	1.33918	0.866526	2-keto-4-pentenoate hydratase/2-oxohepta-3-ene-1,7-dioic acid hydratase in catechol pathway
Ga0265800_101643	2778262796	B	0	1.34555	0.352641	0.56307	0.896963	0.938538	1.87247	tripartite-type tricarboxylate transporter receptor subunit TctC
Ga0265800_101644	2778262797	B	0	1.84901	0.290752	0.696377	0.739546	1.30583	2.12801	nicotinate dehydrogenase subunit A
Ga0265800_101645	2778262798	B	0.722856	3.36713	1.49851	2.15344	2.09636	1.04691	2.86017	CO/xanthine dehydrogenase Mo-binding subunit
Ga0265800_101646	2778262799	B	12.576	15.253	4.34511	14.5697	15.6939	10.6681	27.0876	molybdate transport system substrate-binding protein
Ga0265800_101647	2778262800	B	11.22	31.4146	9.08228	36.3432	28.3837	29.3768	43.9179	high-affinity iron transporter
Ga0265800_101648	2778262801	B	2.22723	9.06967	3.69372	9.82976	7.6336	7.73142	12.3907	iron complex outermembrane receptor protein
Ga0265800_101649	2778262802	B	1.46412	9.77964	3.13636	11.1466	11.3229	8.9868	18.6863	uncharacterized iron-regulated membrane protein
Ga0265800_101650	2778262803	B	3.78022	7.50859	3.39585	11.0947	6.77715	7.06521	13.7429	Fe(3+) dicitrate transport protein
Ga0265800_101651	2778262804	B	44.2112	15.5426	8.40141	47.5613	19.4268	15.2454	35.8416	hypothetical protein
Ga0265800_101652	2778262805	B	2.50505	10.5679	4.50067	20.5916	15.8507	11.6616	31.2262	uncharacterized protein DUF2325
Ga0265800_101653	2778262806	B	0	7.21046	5.37077	17.6277	15.5582	9.0827	15.929	Cd(II)/Pb(II)-responsive transcriptional regulator
Ga0265800_101654	2778262807	B	5.66495	9.9577	6.06758	14.2199	9.95695	10.6464	16.3477	Co/Zn/Cd efflux system component
Ga0265800_101655	2778262808	B	0	5.57413	3.04347	5.83151	6.03818	6.62181	10.7445	predicted amidohydrolase
Ga0265800_101656	2778262809	B	2.38181	5.02402	2.96256	3.94199	5.23295	4.18876	7.65279	aspartate racemase
Ga0265800_101657	2778262810	B	0	0.399747	0.5051	0.261521	1.01585	0.297713	0.875192	glycosyl hydrolase family 8
Ga0265800_101658	2778262811	B	1.99087	1.74974	1.14643	1.46443	1.98289	1.71629	3.3168	glycosyl hydrolase family 8
Ga0265800_101659	2778262812	B	0	2.97737	2.34092	1.5291	2.43584	2.12395	6.9632	4-carboxymuconolactone decarboxylase
Ga0265800_101660	2778262813	B	0	2.83309	1.05187	1.01267	3.06895	2.22314	5.40767	uncharacterized protein involved in outer membrane biogenesis
Ga0265800_101661	2778262814	B	0	0	0.528856	0.844437	0.672589	0.527823	2.04918	hypothetical protein
Ga0265800_101662	2778262815	B	7.21263	0	0.498404	0	2.53544	0.49743	1.28746	BON domain-containing protein
Ga0265800_101663	2778262816	B	0	0	0	0.675235	2.15128	0	2.18478	hypothetical protein
Ga0265800_101664	2778262817	B	0	0.563366	0.295294	0.117876	0.657211	0.221038	0.635661	type I restriction enzyme M protein
Ga0265800_101665	2778262818	B	0	0.8238	0	0.517103	0.411869	0.484829	1.67313	hypothetical protein
Ga0265800_101666	2778262819	B	0	0	0.543553	0.867905	1.15213	0.904152	1.40409	hypothetical protein
Ga0265800_101667	2778262820	B	0	0.558916	0.703107	0.701668	0.894198	0.701733	0.567576	type I restriction enzyme S subunit
Ga0265800_101668	2778262821	B	0.556684	0.684966	0.692418	0.614223	0.929527	0.787047	0.679018	type I restriction enzyme R subunit
Ga0265800_101669	2778262822	B	0.727112	1.08638	0.602934	0.280793	0.8307	0.47639	1.03832	DNA helicase/exodeoxyribonuclease V alpha subunit
Ga0265800_101670	2778262823	B	1.25339	2.49693	1.64561	0.852813	1.1015	0.763569	2.17516	DNA helicase/exodeoxyribonuclease V beta subunit
Ga0265800_101671	2778262824	B	2.20655	6.3997	2.65308	2.11812	4.1498	2.93703	7.1947	DNA helicase/exodeoxyribonuclease V gamma subunit
Ga0265800_101672	2778262825	B	10.5373	10.1872	4.36887	4.53432	8.51957	6.32248	12.9156	leucyl/phenylalanyl-tRNA--protein transferase
Ga0265800_101673	2778262826	B	6.91215	14.175	5.09482	7.88081	12.7565	8.42181	12.5439	arginine-tRNA-protein transferase
Ga0265800_101674	2778262827	B	8.61359	18.1689	8.77937	12.7115	19.6814	14.7027	32.8647	IclR family transcriptional regulator
Ga0265800_101675	2778262828	B	25.7121	44.9135	19.6552	47.6079	51.8302	44.0547	74.0555	murein-DD-endopeptidase
Ga0265800_101676	2778262829	B	10.3694	8.11102	4.01262	12.5853	12.0289	13.7307	17.0595	2-isopropylmalate synthase
Ga0265800_101677	2778262830	B	3.74667	8.14992	3.88351	11.575	9.96025	12.5644	15.3263	2-isopropylmalate synthase
Ga0265800_101678	2778262831	B	2.0721	5.28132	2.29097	2.17197	2.73151	4.14427	3.82201	CDP-diacylglycerol--serine O-phosphatidyltransferase
Ga0265800_101679	2778262832	B	14.7022	28.2838	10.3852	20.818	16.7967	17.4626	20.12	ketol-acid reductoisomerase
Ga0265800_101680	2778262833	B	19.3868	25.2174	6.96622	19.0377	15.3338	15.9108	22.9551	acetolactate synthase small subunit
Ga0265800_101681	2778262834	B	14.2568	28.3494	8.74336	17.9425	17.1493	15.4246	25.8196	acetolactate synthase large subunit
Ga0265800_101682	2778262835	B	3.24135	5.41267	5.82353	5.90102	10.8245	8.38291	12.8252	RNA polymerase sigma-70 factor (ECF subfamily)
Ga0265800_101683	2778262836	B	0	19.3138	4.62162	10.8056	16.7934	17.4619	35.9573	uncharacterized protein DUF3619
Ga0265800_101684	2778262837	B	5.05616	13.7757	5.24082	6.83399	10.8864	8.63045	16.0951	uncharacterized protein DUF3106
Ga0265800_101685	2778262838	B	8.71204	12.6339	3.01007	6.48845	10.336	7.36027	11.1449	uncharacterized RDD family membrane protein YckC
Ga0265800_101686	2778262839	B	0	17.3833	7.3594	8.67331	14.7078	9.96824	22.9334	diacylglycerol kinase (ATP)
Ga0265800_101687	2778262840	B	6.19802	14.7078	4.92536	8.20638	9.53214	8.76284	15.3045	hypothetical protein
Ga0265800_101688	2778262841	B	19.3892	19.313	6.69911	12.4794	16.4716	14.2635	20.3813	nitrogen regulatory protein P-II family
Ga0265800_101689	2778262842	B	1.89853	6.42409	2.62383	5.6035	6.25675	6.21942	8.27455	NAD+ synthase (glutamine-hydrolysing)
Ga0265800_101690	2778262843	B	2.68184	3.53555	1.57521	4.73446	4.71371	4.25402	7.30034	hypothetical protein
Ga0265800_101691	2778262844	B	0	2.46438	0.484398	1.5469	3.69629	1.93381	3.75385	hypothetical protein
Ga0265800_101692	2778262845	B	0.892661	1.56909	0.801895	1.32965	1.09828	0.923455	1.9652	uncharacterized protein DUF3373
Ga0265800_101693	2778262846	B	2.2434	0.985847	0.465067	0.433174	0.690041	0.541518	0.967751	octaheme c-type cytochrome (tetrathionate reductase family)
Ga0265800_101694	2778262847	B	0	3.51707	0.395037	2.52306	7.03361	7.49104	6.46283	ArsR family transcriptional regulator
Ga0265800_101695	2778262848	B	0	4.12821	0	2.59129	1.03197	4.4542	8.38433	nitrate reductase NapE
Ga0265800_101696	2778262849	B	0	3.30994	1.08434	4.15533	4.96453	3.67954	4.20153	periplasmic nitrate reductase subunit NapC
Ga0265800_101697	2778262850	B	7.75473	3.40776	1.87552	4.27813	2.38525	3.3426	4.72943	periplasmic nitrate reductase subunit NapB
Ga0265800_101698	2778262851	B	1.85622	4.40478	1.75299	2.62836	3.26256	3.32843	4.52825	periplasmic nitrate reductase subunit NapA apoprotein
Ga0265800_101699	2778262852	B	7.21263	7.6069	1.99362	9.94767	13.3111	7.21274	15.2349	periplasmic nitrate reductase chaperone NapD
Ga0265800_101700	2778262853	B	6.79477	4.77746	3.05194	5.43539	8.06136	8.66931	11.3201	inorganic pyrophosphatase
Ga0265800_101701	2778262854	B	1.4436	4.12347	3.19216	2.66796	5.26496	3.9824	9.01893	K(+)-stimulated pyrophosphate-energized sodium pump
Ga0265800_101702	2778262855	B	2.0721	0.546343	2.43415	2.85785	5.46302	5.50187	7.39744	hypothetical protein
Ga0265800_101703	2778262856	B	1.11916	4.72135	2.93875	6.72986	11.7041	13.6231	18.4122	aldehyde dehydrogenase (NAD+)
Ga0265800_101704	2778262857	B	3.83302	5.45744	3.12544	10.0232	16.9774	31.3783	20.2978	PAS domain S-box-containing protein
Ga0265800_101705	2778262858	B	0	4.33071	1.70249	1.1893	2.43584	1.59297	4.67268	hypothetical protein
Ga0265800_101706	2778262859	B	0	6.67214	0.936767	0.523516	2.02532	1.72963	5.68659	predicted Zn-dependent protease
Ga0265800_101707	2778262860	B	4.9797	4.59542	1.20437	1.23624	1.96932	0.772724	4.29626	hypothetical protein
Ga0265800_101708	2778262861	B	5.77096	4.69162	2.1933	5.73071	6.46634	9.65158	12.7907	cyclic pyranopterin monophosphate synthase subunit MoaA
Ga0265800_101709	2778262862	B	0	10.5703	3.24323	9.06245	8.24935	10.1153	15.6211	molybdenum cofactor guanylyltransferase
Ga0265800_101710	2778262863	B	5.1271	6.98451	2.92289	5.79846	7.09662	7.95595	13.7279	molybdopterin molybdochelatase
Ga0265800_101711	2778262864	B	3.34233	4.70005	2.23262	4.73268	5.48298	6.03165	9.5126	hypothetical protein
Ga0265800_101712	2778262865	B	4.14421	4.37075	3.29327	8.11629	6.19142	11.2896	10.6646	hypothetical protein
Ga0265800_101713	2778262866	B	2.17234	6.4914	3.60268	12.3439	7.63636	15.656	14.6704	hypothetical protein
Ga0265800_101714	2778262867	B	6.01698	11.1053	6.65252	23.0702	16.5245	38.0216	31.6393	hypothetical protein
Ga0265800_101715	2778262868	B	9.16504	9.66603	12.033	34.382	31.4122	45.5098	45.807	molybdopterin synthase subunit MoaD
Ga0265800_101716	2778262869	B	0.973019	3.80552	1.71455	4.5896	4.40381	4.66385	5.78948	multidrug efflux pump
Ga0265800_101717	2778262870	B	2.41327	5.30247	2.75155	9.31948	6.78665	11.4424	12.8513	membrane fusion protein (multidrug efflux system)
Ga0265800_101718	2778262871	B	4.20761	2.95841	1.74451	3.71401	5.91637	5.36841	4.25602	ribonuclease HI
Ga0265800_101719	2778262872	B	4.50309	2.96827	1.40026	3.10533	3.9574	4.96899	3.21521	methyltransferase family protein
Ga0265800_101720	2778262873	B	0	4.90244	3.08359	4.1851	5.68639	6.46289	7.89905	hydroxyacylglutathione hydrolase
Ga0265800_101721	2778262874	B	13.6232	18.6966	5.21381	16.0141	13.2616	14.9965	20.7322	membrane-bound lytic murein transglycosylase D
Ga0265800_101722	2778262875	B	115.177	57.081	78.2625	326.353	317.436	780.324	543.39	YXWGXW repeat-containing protein
Ga0265800_101723	2778262876	B	20.2954	17.3022	14.3049	46.5778	68.6686	101.968	99.6858	NitT/TauT family transport system permease protein
Ga0265800_101724	2778262877	B	10.2743	10.836	12.0695	23.4661	37.0201	40.6019	56.1196	NitT/TauT family transport system ATP-binding protein
Ga0265800_101725	2778262878	B	9.48771	9.58941	7.97665	12.4748	30.4336	17.667	25.9209	NitT/TauT family transport system substrate-binding protein
Ga0265800_101726	2778262879	B	4.77725	3.7788	8.583	6.32524	17.2132	9.38991	16.7706	uncharacterized MAPEG superfamily protein
Ga0265800_101727	2778262880	B	15.495	3.54078	4.92536	5.64189	10.6215	6.19811	16.2265	DNA replication and repair protein RecR
Ga0265800_101728	2778262881	B	6.63589	2.33288	5.04405	6.22351	8.74762	8.92425	15.7935	hypothetical protein
Ga0265800_101729	2778262882	B	1.75988	2.47478	3.34429	3.25249	5.72249	4.09633	12.0159	DNA polymerase-3 subunit gamma/tau
Ga0265800_101731	2778262884	B	0	17.2658	10.4075	10.1153	17.2645	12.4195	18.897	hypothetical protein
Ga0265800_101732	2778262885	B	25.9385	16.4645	21.1103	43.0882	46.8569	120.452	77.3387	hypothetical protein
Ga0265800_101733	2778262886	B	18.5713	9.32687	7.88314	18.5149	27.6288	28.9551	39.6219	hypothetical protein
Ga0265800_101734	2778262887	B	19.9077	12.2476	8.2539	21.2332	27.9924	31.3493	49.3546	thioredoxin
Ga0265800_101735	2778262888	B	30.7626	39.4287	15.4116	30.1944	33.5682	41.0615	52.1277	transcription termination factor Rho
Ga0265800_101736	2778262889	B	154.747	220.158	100.249	200.088	157.244	146.078	207.168	large subunit ribosomal protein L31
Ga0265800_101737	2778262890	B	30.9427	38.5531	13.0807	16.7693	22.2343	16.2561	34.7101	ketopantoate reductase
Ga0265800_101738	2778262891	B	0	16.7851	24.1947	8.78008	5.59462	7.68328	8.52259	hypothetical protein
Ga0265800_101739	2778262892	B	8.49443	11.6962	4.89148	2.96793	6.22089	3.87299	7.1882	4-amino-4-deoxy-L-arabinose transferase-like glycosyltransferase
Ga0265800_101740	2778262893	B	2.39571	10.8436	2.73153	2.04859	3.68445	3.4284	4.91782	MATE family multidrug resistance protein
Ga0265800_101741	2778262894	B	0	6.24584	4.09227	1.30685	2.08179	1.63371	5.28551	hypothetical protein
Ga0265800_101742	2778262895	B	1.06373	6.26383	2.79321	1.05631	2.89797	1.43056	3.35449	polyphosphate:AMP phosphotransferase
Ga0265800_101743	2778262896	B	2.2083	4.26986	1.75486	1.46193	2.52291	1.02802	2.82498	mechanosensitive ion channel-like protein
Ga0265800_101744	2778262897	B	2.12289	4.01143	2.42047	1.87385	1.77236	1.39088	3.69465	inorganic triphosphatase YgiF
Ga0265800_101745	2778262898	B	6.06733	5.33249	1.67705	2.00834	1.59963	1.04611	7.03965	hypothetical protein
Ga0265800_101746	2778262899	B	0	5.45411	3.43059	4.33652	3.6358	3.56655	6.76942	phosphohistidine phosphatase SixA
Ga0265800_101747	2778262900	B	0	5.11226	7.14571	3.20899	5.11188	2.22867	7.11424	ArsR family transcriptional regulator
Ga0265800_101748	2778262901	B	7.15246	6.70527	3.70684	3.61705	5.44762	3.57628	7.34113	hypothetical protein
Ga0265800_101749	2778262902	B	16.9869	9.55493	3.05194	5.81024	6.56851	6.2091	9.80404	hypothetical protein
Ga0265800_101750	2778262903	B	6.03317	8.37791	4.83606	8.78693	7.84707	7.48956	9.15387	phosphoglucosamine mutase
Ga0265800_101751	2778262904	B	17.8982	9.08872	4.12264	10.9712	7.16557	10.5608	13.4893	dihydropteroate synthase
Ga0265800_101752	2778262905	B	28.4188	30.6145	16.8885	40.4942	28.8996	41.8028	35.4852	membrane protease FtsH catalytic subunit
Ga0265800_101753	2778262906	B	7.90799	6.02352	2.18581	3.49014	3.47485	2.99962	4.62685	23S rRNA Um-2552 2'-O-methyltransferase
Ga0265800_101754	2778262907	B	16.2759	14.6623	5.90463	8.08121	8.22458	8.41871	16.7053	putative YhbY family RNA-binding protein
Ga0265800_101755	2778262908	B	5.07149	14.709	6.30805	10.9116	12.4794	15.3896	19.9158	uncharacterized protein DUF4149
Ga0265800_101756	2778262909	B	16.143	18.0895	6.69302	8.68312	9.93073	11.6899	12.6067	transcription elongation factor GreA
Ga0265800_101757	2778262910	B	41.9364	44.9742	23.0853	16.3248	18.3859	17.4507	28.1905	carbamoyl-phosphate synthase large subunit
Ga0265800_101758	2778262911	B	36.2412	73.1367	28.1254	35.6808	51.9391	44.4609	85.6323	carbamoyl-phosphate synthase small subunit
Ga0265800_101759	2778262912	B	6.63369	4.85855	3.20879	2.19581	3.88654	1.83001	6.77579	TrmH family RNA methyltransferase
Ga0265800_101760	2778262913	B	2.52808	9.55414	3.66857	4.88142	3.9991	3.39988	5.26474	RNase HII
Ga0265800_101761	2778262914	B	4.40542	5.67873	4.76926	1.37722	4.12967	2.17742	5.98515	lipid-A-disaccharide synthase
Ga0265800_101762	2778262915	B	12.9769	11.7854	8.21999	6.20458	7.41286	6.63773	10.2951	acyl-[acyl-carrier-protein]--UDP-N-acetylglucosamine O-acyltransferase
Ga0265800_101763	2778262916	B	8.94876	27.5273	14.2226	17.0321	18.4812	10.8004	19.5677	3-hydroxyacyl-[acyl-carrier-protein] dehydratase
Ga0265800_101764	2778262917	B	15.3097	21.5288	10.2266	9.85373	11.81	13.6675	20.9008	UDP-3-O-[3-hydroxymyristoyl] glucosamine N-acyltransferase
Ga0265800_101765	2778262918	B	26.3154	24.1194	14.5475	12.2363	15.5278	18.4081	21.5853	periplasmic chaperone for outer membrane proteins Skp
Ga0265800_101766	2778262919	B	25.0934	27.9552	14.2	10.2517	11.9799	9.09735	19.3291	Beta-barrel assembly machine subunit BamA
Ga0265800_101767	2778262920	B	19.9287	39.6664	18.3883	16.9441	14.9382	18.9588	25.0056	site-2 protease
Ga0265800_101768	2778262921	B	23.3017	33.7309	16.0071	11.6452	11.2026	9.12228	20.4298	1-deoxy-D-xylulose 5-phosphate reductoisomerase
Ga0265800_101769	2778262922	B	31.9476	48.4351	24.008	20.0483	18.2495	18.3151	29.7014	phosphatidate cytidylyltransferase
Ga0265800_101770	2778262923	B	55.8589	56.7778	30.5438	28.5385	37.1376	32.4104	57.4408	undecaprenyl diphosphate synthase
Ga0265800_101771	2778262924	B	68.5178	75.7043	36.5247	40.1399	46.7381	44.7791	58.6286	ribosome recycling factor
Ga0265800_101772	2778262925	B	65.2527	75.1918	36.9075	48.9315	46.0887	61.2534	48.1005	uridylate kinase
Ga0265800_101773	2778262926	B	72.8064	115.499	59.6178	106.54	85.0983	111.282	108.462	translation elongation factor Ts (EF-Ts)
Ga0265800_101774	2778262927	B	85.2498	84.8473	62.0932	110.204	96.18	124.103	136.954	small subunit ribosomal protein S2
Ga0265800_101775	2778262928	B	4.71146	7.03942	3.41847	5.39338	6.3143	7.18914	10.8279	aspartyl-tRNA(Asn)/glutamyl-tRNA(Gln) amidotransferase subunit A
Ga0265800_101776	2778262929	B	3.81562	4.24776	4.13075	6.66584	4.13567	6.88576	9.61095	glycine/D-amino acid oxidase-like deaminating enzyme
Ga0265800_101777	2778262930	B	5.48398	7.32609	4.01688	6.05081	6.84359	7.90461	13.8677	hydroxyethylthiazole kinase-like uncharacterized protein yjeF/hydroxyethylthiazole kinase-like uncharacterized protein yjeF
Ga0265800_101778	2778262931	B	13.5711	8.7468	4.68892	5.98953	7.55348	7.64361	14.2656	NADP-dependent 3-hydroxy acid dehydrogenase YdfG
Ga0265800_101779	2778262932	B	2.18193	5.1777	1.8093	0.962982	1.15051	0.97812	1.62282	hypothetical protein
Ga0265800_101780	2778262933	B	7.57633	7.65754	4.97359	1.88087	1.33165	0.522513	3.83174	hypothetical protein
Ga0265800_101781	2778262934	B	0	4.68634	4.60573	1.47082	3.51449	1.37902	6.34527	hypothetical protein
Ga0265800_101782	2778262935	B	9.86403	7.80242	4.08971	2.7209	3.46748	1.97283	7.74724	LuxR family two component transcriptional regulator
Ga0265800_101783	2778262936	B	30.1476	11.3555	10.1186	4.98954	12.6794	10.6929	15.3753	histidine kinase/DNA gyrase B/HSP90-like ATPase
Ga0265800_101785	2778262938	B	2.44065	7.72218	4.55361	4.57795	1.9304	3.45062	8.27749	DNA polymerase-3 subunit epsilon
Ga0265800_101786	2778262939	B	16.0535	13.5045	8.71607	6.95859	7.86023	9.3317	11.0529	2-deoxy-D-gluconate 3-dehydrogenase
Ga0265800_101787	2778262940	B	22.1518	17.522	9.37566	12.8317	12.1671	27.2127	25.1251	uncharacterized protein DUF599
Ga0265800_101788	2778262941	B	11.8442	15.0941	12.686	15.0287	17.1748	41.6596	22.1991	uncharacterized protein (TIGR01244 family)
Ga0265800_101789	2778262942	B	19.1397	24.111	11.0215	7.74327	7.8495	7.92	14.0454	2Fe-2S ferredoxin
Ga0265800_101790	2778262943	B	26.1598	39.6047	20.0595	11.8714	12.5331	9.22446	21.8665	chaperone protein HscA
Ga0265800_101791	2778262944	B	64.2458	62.4249	28.8566	15.7525	26.9755	15.6309	42.8985	molecular chaperone HscB
Ga0265800_101792	2778262945	B	89.8647	144.596	68.7853	58.3478	51.0299	46.244	115.371	iron-binding apoprotein IscA
Ga0265800_101793	2778262946	B	58.804	94.4372	48.0226	40.1089	38.5237	37.6056	81.5869	FeS assembly scaffold apoprotein IscU
Ga0265800_101794	2778262947	B	100.026	142.651	65.4331	56.1389	71.2615	54.1758	96.8519	cysteine desulfurase IscS
Ga0265800_101795	2778262948	B	208.137	294.516	117.458	107.553	206.694	146.655	241.905	BadM/Rrf2 family transcriptional regulator
Ga0265800_101796	2778262949	B	0.743528	3.59412	1.6955	3.81476	4.37796	6.05086	5.17609	excinuclease ABC subunit B
Ga0265800_101797	2778262950	B	2.71874	8.84101	4.03918	9.14924	11.4686	10.3126	16.3383	aromatic-amino-acid transaminase
Ga0265800_101798	2778262951	B	23.8415	15.6107	24.1357	73.3932	87.3715	137.502	117.671	poly(3-hydroxybutyrate) depolymerase
Ga0265800_101799	2778262952	B	24.2414	21.5421	26.0573	67.4618	88.2923	135.884	154.093	electron transport complex protein RnfB
Ga0265800_101800	2778262953	B	17.8975	14.1569	20.0971	42.4569	61.7351	57.3963	97.3058	CBS domain protein
Ga0265800_101801	2778262954	B	18.7949	8.53461	12.0135	16.6765	41.7063	30.3532	41.7034	2-oxoglutarate ferredoxin oxidoreductase subunit beta
Ga0265800_101802	2778262955	B	5.96823	6.74408	8.60177	8.70175	19.931	10.202	26.5065	2-oxoglutarate ferredoxin oxidoreductase subunit alpha
Ga0265800_101803	2778262956	B	3.45212	6.82655	4.83057	5.23729	14.8656	5.68418	25.4442	NADPH-dependent glutamate synthase beta subunit-like oxidoreductase
Ga0265800_101804	2778262957	B	7.75473	10.2233	9.10968	6.20329	16.6968	12.1671	28.6073	lactoylglutathione lyase
Ga0265800_101805	2778262958	B	1.52846	7.52274	4.75286	2.52967	4.49987	3.53133	8.77609	propionyl-CoA carboxylase alpha chain
Ga0265800_101806	2778262959	B	2.08262	8.78585	4.53323	3.21703	4.20957	2.7649	5.35938	propionyl-CoA carboxylase carboxyltransferase subunit
Ga0265800_101807	2778262960	B	4.45843	15.1514	5.23743	4.34535	6.26905	5.43219	12.6891	LAO/AO transport system kinase
Ga0265800_101808	2778262961	B	4.83353	18.4793	5.51107	5.73312	8.92039	8.08378	16.5368	lysophospholipase L1-like esterase
Ga0265800_101809	2778262962	B	9.39713	31.003	8.69138	9.01255	13.1499	11.7403	20.7309	methylmalonyl-CoA mutase
Ga0265800_101810	2778262963	B	0	6.93065	2.14074	3.2628	4.45508	3.88465	5.27853	GntR family transcriptional regulator
Ga0265800_101811	2778262964	B	1.74309	7.6599	3.37261	4.61582	7.96569	3.78677	10.4233	hypothetical protein
Ga0265800_101812	2778262965	B	0.759532	3.07069	0.682302	1.08945	2.46972	1.93814	2.71154	TRAP transporter 4TM/12TM fusion protein
Ga0265800_101813	2778262966	B	0	2.9454	1.1579	1.1093	4.12325	0.808943	3.68895	Fe-S-cluster-containing dehydrogenase component
Ga0265800_101814	2778262967	B	0.824156	1.08651	0.626455	0.682006	1.15886	0.65365	1.25046	aldehyde:ferredoxin oxidoreductase
Ga0265800_101815	2778262968	B	1.87544	0.49449	0.518383	0.206929	1.64817	1.09941	1.50645	putative nucleotidyltransferase with HDIG domain
Ga0265800_101816	2778262969	B	0	0.704363	0.387658	0.132639	0.422586	0.248722	0.619906	tungsten-dependent benzoyl-CoA reductase subunit bamB
Ga0265800_101817	2778262970	B	3.44477	0.605511	1.19019	0.570123	0.908198	0.118787	1.1273	benzoyl-CoA reductase subunit BamC
Ga0265800_101818	2778262971	B	0	0.249951	0	0.0784477	0.249932	0.490344	0.592255	tungsten-dependent benzoyl-CoA reductase-related protein bamD
Ga0265800_101819	2778262972	B	0	0.261444	0.102779	0.35557	0.392136	0.32483	0.309744	tungsten-dependent benzoyl-CoA reductase-related protein bamE
Ga0265800_101820	2778262973	B	0	0	0	0.248426	0.39574	0.465843	0.334918	coenzyme F420-reducing hydrogenase delta subunit
Ga0265800_101821	2778262974	B	0	0.379498	0.596753	0.714638	0.758939	0.595587	0.770756	tungsten-dependent benzoyl-CoA reductase-related protein bamG
Ga0265800_101822	2778262975	B	0.940233	0.908993	0.259886	0.155612	0.908924	0.616023	1.09091	tungsten-dependent benzoyl-CoA reductase-related protein bamH
Ga0265800_101823	2778262976	B	0	1.28906	0.810807	0.647318	1.28896	0.202306	1.48357	tungsten-dependent benzoyl-CoA reductase-related protein bamI
Ga0265800_101824	2778262977	B	0	1.84811	0.558868	1.42777	2.13227	1.506	3.89785	predicted N-acetyltransferase YhbS
Ga0265800_101825	2778262978	B	1.37833	1.45368	1.23818	2.12912	2.90714	3.37459	3.19844	glutaryl-CoA dehydrogenase
Ga0265800_101826	2778262979	B	0	1.94111	0.76309	1.42152	2.58795	0.888532	4.65419	LysR family glycine cleavage system transcriptional activator
Ga0265800_101827	2778262980	B	0	3.51475	0	1.47082	3.51449	3.21771	5.94869	acetyl-CoA carboxylase biotin carboxyl carrier protein
Ga0265800_101828	2778262981	B	0	0.867339	1.36387	1.01109	1.85844	1.16675	2.26486	glutaryl-CoA dehydrogenase (non-decarboxylating)
Ga0265800_101829	2778262982	B	0.912446	1.36329	0.504411	1.00676	1.52356	0.566354	1.1944	glutaconyl-CoA decarboxylase alpha subunit
Ga0265800_101830	2778262983	B	1.35193	2.85166	1.12104	1.64083	1.90096	1.81814	2.29254	oxaloacetate decarboxylase beta subunit
Ga0265800_101831	2778262984	B	0	3.15613	2.48147	3.96223	0	3.71493	5.34171	hypothetical protein
Ga0265800_101832	2778262985	B	0	0.919773	0.361581	0.577346	2.75911	1.4435	3.58043	enamine deaminase RidA (YjgF/YER057c/UK114 family)
Ga0265800_101833	2778262986	B	0	1.96011	0.28896	1.30727	2.32746	1.63424	4.56152	acyl-CoA dehydrogenase
Ga0265800_101834	2778262987	B	1.97281	3.64113	0.545295	1.08836	2.08049	1.76875	5.39959	enoyl-CoA hydratase
Ga0265800_101835	2778262988	B	1.97758	2.4333	0.865475	1.16373	2.0276	1.65938	3.47117	anthraniloyl-CoA monooxygenase
Ga0265800_101836	2778262989	B	0	4.95072	1.65134	1.78922	3.15022	3.6494	5.12899	tRNA-U16,U17-dihydrouridine synthase
Ga0265800_101837	2778262990	B	6.83446	9.73088	4.06154	7.91792	7.20751	7.82439	14.5581	sugar phosphate permease
Ga0265800_101838	2778262991	B	5.01996	20.7363	6.24396	18.0012	26.911	28.0429	29.5702	hypothetical protein
Ga0265800_101839	2778262992	B	11.7953	12.6474	3.74934	13.7954	20.1099	14.5613	20.6336	3-oxoacyl-[acyl-carrier-protein] reductase
Ga0265800_101840	2778262993	B	2.76438	7.89612	2.10125	5.94772	8.50287	8.38859	12.0071	acetyl-CoA C-acetyltransferase
Ga0265800_101841	2778262994	B	1.88765	5.97251	2.41313	5.93587	7.79685	7.55071	9.91186	polyhydroxyalkanoate synthase
Ga0265800_101842	2778262995	B	0	2.91085	2.86078	2.74073	8.00424	6.28143	11.0848	hypothetical protein
Ga0265800_101843	2778262996	B	2.22117	5.07561	1.84184	8.21003	6.63683	9.19119	16.3879	hypothetical protein
Ga0265800_101844	2778262997	B	2.78458	2.93679	2.1166	6.91289	7.09671	11.7146	11.8463	maleylacetoacetate isomerase
Ga0265800_101845	2778262998	B	5.32319	5.77012	2.82011	15.1729	11.6953	22.7004	14.728	acetyl esterase
Ga0265800_101846	2778262999	B	0	6.43189	4.0456	15.7456	24.4393	40.6294	25.6907	heme-degrading monooxygenase HmoA
Ga0265800_101847	2778263000	B	7.86601	6.222	2.89895	21.9869	17.0516	40.8677	23.0895	outer membrane protein OmpA-like peptidoglycan-associated protein
Ga0265800_101848	2778263001	B	0	2.79057	1.37128	1.97061	2.55783	1.50546	3.46354	3-hydroxybenzoate 6-hydroxylase
Ga0265800_101849	2778263002	B	0	2.3274	1.33083	1.46092	2.32723	1.53577	3.50939	FAD dependent oxidoreductase
Ga0265800_101850	2778263003	B	0	1.51421	0.541149	0.51844	1.65174	1.02617	3.02874	gentisate 1,2-dioxygenase
Ga0265800_101851	2778263004	B	2.50246	3.07913	1.21047	4.00363	5.49804	5.43647	6.25368	fumarylpyruvate hydrolase
Ga0265800_101852	2778263005	B	0	4.61105	1.39438	3.78495	4.96537	4.73163	5.52294	TRAP-type C4-dicarboxylate transport system permease small subunit
Ga0265800_101853	2778263006	B	1.22762	2.37367	1.18763	0.880433	1.5104	1.94729	2.30088	tripartite ATP-independent transporter DctM subunit
Ga0265800_101854	2778263007	B	6.18652	3.53421	0.96187	1.36519	2.31066	1.43999	3.86504	TRAP-type C4-dicarboxylate transport system substrate-binding protein
Ga0265800_101855	2778263008	B	0	3.88169	3.2867	4.31082	2.38855	2.69452	6.97401	ADP-ribose pyrophosphatase YjhB (NUDIX family)
Ga0265800_101856	2778263009	B	6.52791	7.81705	2.25544	3.64633	4.7329	5.31807	10.0259	serine/threonine-protein kinase
Ga0265800_101857	2778263010	B	15.1764	6.83588	4.32593	4.18626	5.1682	5.69122	8.74779	class 3 adenylate cyclase
Ga0265800_101859	2778263012	B	13.0681	15.6966	6.92317	11.7753	9.57038	10.6649	14.5143	MerR family transcriptional regulator
Ga0265800_101860	2778263013	B	5.71677	15.5756	7.50571	13.8769	15.072	16.7563	12.2454	integration host factor subunit alpha
Ga0265800_101861	2778263014	B	14.7866	18.5895	7.6411	9.82443	8.70083	12.7694	17.3666	phenylalanyl-tRNA synthetase beta subunit
Ga0265800_101862	2778263015	B	20.3612	37.8551	13.5287	22.3793	21.1973	20.6855	37.6029	phenylalanyl-tRNA synthetase alpha subunit
Ga0265800_101863	2778263016	B	59.2212	125.958	72.024	146.04	124.387	105.783	207.72	LSU ribosomal protein L20P
Ga0265800_101864	2778263017	B	99.6873	165.215	67.9014	155.559	153.938	118.841	221.157	LSU ribosomal protein L35P
Ga0265800_101866	2778263019	B	38.9797	80.3522	33.7919	55.7157	81.5918	78.5714	89.1876	translation initiation factor 3 (bIF-3)
Ga0265800_101867	2778263020	B	14.8348	22.4545	11.1623	14.2767	19.266	19.8653	23.8812	threonyl-tRNA synthetase
Ga0265800_101868	2778263021	B	3.65562	5.1406	2.02087	1.88229	5.2473	2.10096	15.552	isocitrate lyase
Ga0265800_101869	2778263022	B	0	1.48347	0.777575	1.7589	0.988905	1.87547	2.0644	threonine/homoserine efflux transporter RhtA
Ga0265800_101870	2778263023	B	13.3027	29.6185	11.95	23.2396	36.241	23.2417	51.9759	SWIB/MDM2 domain-containing protein
Ga0265800_101871	2778263024	B	4.56223	7.69859	2.64816	4.93311	6.33482	5.53768	9.60947	acetolactate synthase-1/2/3 large subunit
Ga0265800_101872	2778263025	B	0	3.12862	0.756876	1.81278	2.1658	2.36061	2.76978	TetR family transcriptional regulator
Ga0265800_101873	2778263026	B	1.70108	1.94357	1.05792	1.31383	3.28887	1.52512	3.03643	tripartite-type tricarboxylate transporter receptor subunit TctC
Ga0265800_101874	2778263027	B	0	3.45948	1.26285	1.31843	2.8415	2.13295	3.1785	predicted dehydrogenase
Ga0265800_101875	2778263028	B	2.75667	5.57243	2.28588	3.4218	6.66219	4.75294	9.39028	uncharacterized protein DUF993
Ga0265800_101876	2778263029	B	5.69114	7.5028	2.88395	7.32595	11.0033	7.5883	19.9788	sugar phosphate isomerase/epimerase
Ga0265800_101877	2778263030	B	3.39739	11.3465	5.86911	15.5564	21.1984	13.7069	27.896	cytoskeletal protein CcmA (bactofilin family)
Ga0265800_101878	2778263031	B	0	2.56141	1.17476	2.27772	1.70747	2.26119	4.76867	hypothetical protein
Ga0265800_101879	2778263032	B	1.65547	3.34643	1.02956	1.46127	2.18229	1.99801	3.20128	tripartite-type tricarboxylate transporter receptor subunit TctC
Ga0265800_101880	2778263033	B	0	2.26416	1.55765	2.13184	4.24498	3.3313	5.5565	broad specificity phosphatase PhoE
Ga0265800_101881	2778263034	B	0	4.00652	1.28867	1.94334	3.27781	2.64376	6.59605	type II secretion system protein B
Ga0265800_101882	2778263035	B	1.94334	5.55093	1.88003	3.69876	3.3303	3.21661	7.63154	type II secretion system protein A
Ga0265800_101883	2778263036	B	0	11.1116	3.12012	9.71486	9.52347	13.8574	19.0748	hypothetical protein
Ga0265800_101884	2778263037	B	4.59935	12.1269	3.49604	11.6719	7.6798	14.274	17.9249	hypothetical protein
Ga0265800_101885	2778263038	B	20.1772	14.7779	9.29515	19.2943	20.0964	26.6714	17.2078	ArsR family transcriptional regulator
Ga0265800_101886	2778263039	B	8.14722	2.14814	3.37791	4.04519	2.86397	6.18073	5.57475	DNA-binding FrmR family transcriptional regulator
Ga0265800_101887	2778263040	B	0	2.15144	0.845775	0	3.22692	1.68825	2.18478	hypothetical protein
Ga0265800_101888	2778263041	B	0.935255	1.60287	1.06635	1.3415	2.0548	1.37065	3.14411	multidrug efflux pump subunit AcrB
Ga0265800_101889	2778263042	B	2.92824	2.70227	2.12463	3.79632	6.04748	4.94779	11.1943	RND family efflux transporter MFP subunit
Ga0265800_101890	2778263043	B	2.14405	2.44969	2.22236	4.13991	9.42117	7.09765	16.7119	N-formylglutamate deformylase
Ga0265800_101891	2778263044	B	31.9144	11.2196	17.6426	109.16	122.004	152.421	163.306	hypothetical protein
Ga0265800_101892	2778263045	B	0	16.6398	18.1147	80.345	92.1517	138.106	147.745	hypothetical protein
Ga0265800_101893	2778263046	B	33.9501	17.53	23.46	84.2831	105.172	153.216	158.952	predicted NUDIX family NTP pyrophosphohydrolase
Ga0265800_101894	2778263047	B	13.0681	9.18826	20.4685	73.0551	78.0943	171.539	126.741	hypothetical protein
Ga0265800_101895	2778263048	B	6.69361	5.49073	7.09226	22.2795	40.0008	30.2371	38.9642	short-subunit dehydrogenase
Ga0265800_101896	2778263049	B	0	2.12921	1.67407	20.0477	36.1938	20.885	30.9915	hypothetical protein
Ga0265800_101897	2778263050	B	0	10.4715	12.6664	21.2359	39.4666	27.8115	47.443	hypothetical protein
Ga0265800_101898	2778263051	B	5.10323	11.0634	6.93527	15.766	26.4604	17.4803	37.0445	acrylyl-CoA reductase (NADPH)
Ga0265800_101899	2778263052	B	11.7241	5.49555	6.21118	7.54596	21.2937	10.7809	28.8336	hypothetical protein
Ga0265800_101900	2778263053	B	8.14722	7.87652	3.94089	8.53985	20.7638	13.2043	33.6909	hypothetical protein
Ga0265800_101901	2778263054	B	4.72502	7.99405	3.83645	7.95044	9.13537	15.3158	13.0554	ATP-dependent Clp protease ATP-binding subunit ClpB
Ga0265800_101902	2778263055	B	15.7923	23.0401	11.3492	22.3034	28.8674	31.476	44.2572	hypothetical protein
Ga0265800_101903	2778263056	B	12.207	23.6027	7.02932	25.366	25.0313	28.4833	35.5895	molybdopterin synthase subunit MoaE
Ga0265800_101904	2778263057	B	0	19.4057	6.93523	17.1642	14.9942	22.4955	21.7964	molybdopterin synthase subunit MoaD
Ga0265800_101905	2778263058	B	14.631	18.704	8.73156	20.1057	16.3647	29.4	33.8722	molybdopterin molybdotransferase
Ga0265800_101906	2778263059	B	3.49349	3.37741	4.34529	4.81822	6.14029	4.6982	6.65162	molybdopterin guanine dinucleotide biosynthesis accessory protein MobB
Ga0265800_101907	2778263060	B	4.50727	4.95172	1.86876	4.78665	3.664	7.11071	8.74949	threonine synthase
Ga0265800_101908	2778263061	B	7.13524	6.27106	3.78009	6.75744	6.79314	9.02169	10.543	homoserine dehydrogenase
Ga0265800_101909	2778263062	B	2.65304	11.7752	4.21656	7.53769	12.0074	14.5004	15.0358	alanine-synthesizing transaminase
Ga0265800_101910	2778263063	B	5.5251	11.1687	9.54482	16.1549	22.3356	27.4354	40.2712	uncharacterized protein
Ga0265800_101911	2778263064	B	28.2502	43.9823	24.5411	42.525	39.3683	49.4038	45.7443	peroxiredoxin Q/BCP
Ga0265800_101912	2778263065	B	10.2451	14.9798	6.17847	11.304	14.0783	14.2598	19.5067	PhoH-like ATPase
Ga0265800_101913	2778263066	B	28.4928	23.3725	9.18818	21.4825	24.2054	58.2965	35.8845	hypothetical protein
Ga0265800_101914	2778263067	B	12.5091	18.2902	6.28654	4.76799	10.1938	6.86247	14.2431	replicative DNA helicase
Ga0265800_101915	2778263068	B	24.4071	23.6575	9.05928	7.07871	10.357	8.36827	15.6633	trehalose 6-phosphate synthase
Ga0265800_101916	2778263069	B	90.6768	88.0435	39.3857	76.4662	75.1349	54.6451	124.092	LSU ribosomal protein L9P
Ga0265800_101917	2778263070	B	59.9024	118.833	39.6195	88.7548	113.559	70.8216	169.3	small subunit ribosomal protein S18
Ga0265800_101918	2778263071	B	110.504	112.382	53.4518	100.153	106.824	103.429	173.298	restart primosome assembly protein PriB
Ga0265800_101919	2778263072	B	97.1851	138.171	70.3166	109.123	139.667	165.592	221.777	SSU ribosomal protein S6P
Ga0265800_101920	2778263073	B	3.00476	4.75352	1.03817	2.32074	4.22503	3.31565	5.72109	DNA polymerase-3 subunit epsilon
Ga0265800_101921	2778263074	B	1.64831	3.69413	2.16412	2.13695	4.85271	5.25762	6.57102	CBS domain-containing protein
Ga0265800_101922	2778263075	B	5.40428	8.54954	2.98755	7.45359	21.3722	32.9852	17.6856	hypothetical protein
Ga0265800_101923	2778263076	B	2.91274	39.4234	11.4223	10.0029	36.1567	20.5903	43.8687	cation/acetate symporter
Ga0265800_101924	2778263077	B	0	32.9006	12.9339	7.06511	25.9722	13.9277	28.4281	putative solute:sodium symporter small subunit
Ga0265800_101925	2778263078	B	3.17877	8.10196	1.09829	2.80587	7.82199	5.04226	17.6844	Tfp pilus assembly protein PilF
Ga0265800_101926	2778263079	B	0	13.8743	3.81799	4.35448	15.2606	4.35489	7.51428	hypothetical protein
Ga0265800_101927	2778263080	B	2.97859	4.31944	1.33786	2.17728	2.35588	2.28533	5.2725	cation/acetate symporter
Ga0265800_101928	2778263081	B	1.29932	5.42427	2.9629	5.01766	5.48095	5.7798	8.79398	phosphoenolpyruvate synthase
Ga0265800_101929	2778263082	B	0	2.18537	1.28867	1.25745	2.54941	1.50051	3.02062	hypothetical protein
Ga0265800_101930	2778263083	B	3.26275	13.7644	3.38192	23.22	7.45516	26.4399	11.1627	peroxiredoxin (alkyl hydroperoxide reductase subunit C)
Ga0265800_101931	2778263084	B	7.13869	5.55706	1.33894	8.88926	4.12267	8.51029	6.00723	alkyl hydroperoxide reductase subunit F
Ga0265800_101932	2778263085	B	0	16.316	3.06764	16.0304	11.3494	12.5249	30.9765	bacterioferritin
Ga0265800_101933	2778263086	B	97.5304	189.532	57.6601	209.842	158.09	201.79	333.032	bacterioferritin-associated ferredoxin
Ga0265800_101934	2778263087	B	29.8168	101.765	28.1586	111.033	74.6802	78.9985	142.372	uncharacterized protein GlcG (DUF336 family)
Ga0265800_101935	2778263088	B	46.2149	103.124	27.8546	83.9947	63.8551	68.9692	59.8081	modulator of FtsH protease
Ga0265800_101936	2778263089	B	18.2793	37.9545	10.2629	21.3661	20.783	19.1856	26.7826	23S rRNA m(5)U-1939 methyltransferase
Ga0265800_101937	2778263090	B	21.534	24.4144	6.10092	11.6423	15.3288	9.50478	13.3253	hypothetical protein
Ga0265800_101938	2778263091	B	9.76915	35.918	15.1889	19.5817	30.1917	26.0514	42.4809	RNA polymerase RpoS-like sigma 38 subunit
Ga0265800_101939	2778263092	B	11.2526	13.0216	3.62868	6.82865	8.40569	9.7007	16.6826	murein DD-endopeptidase MepM/ murein hydrolase activator NlpD
Ga0265800_101940	2778263093	B	0	5.69656	1.91951	2.4264	5.28926	3.03329	6.88669	protein-L-isoaspartate(D-aspartate) O-methyltransferase
Ga0265800_101941	2778263094	B	2.22117	7.22298	3.3767	4.77897	3.90402	4.59559	7.13665	5'-nucleotidase /3'-nucleotidase /exopolyphosphatase
Ga0265800_101942	2778263095	B	1.71287	4.21518	3.19578	2.92937	2.86008	2.83514	5.09582	NADPH:quinone reductase-like Zn-dependent oxidoreductase
Ga0265800_101944	2778263097	B	3.05314	6.17173	3.37562	3.481	4.02474	4.84298	8.17481	murein L,D-transpeptidase YcbB/YkuD
Ga0265800_101945	2778263098	B	0	18.7632	7.71664	20.6564	20.7823	26.2759	34.004	uncharacterized protein YcbK (DUF882 family)
Ga0265800_101946	2778263099	B	9.82431	14.1749	5.99673	15.2208	13.0946	16.9952	19.1196	peptidyl-prolyl cis-trans isomerase D
Ga0265800_101948	2778263101	B	9.0062	10.2901	3.73405	7.94967	15.0382	11.4908	12.0571	nucleoid protein Hbs
Ga0265800_101949	2778263102	B	0	4.40302	0.839231	2.34504	3.33537	1.83223	5.28419	tartrate dehydrogenase/decarboxylase/D-malate dehydrogenase
Ga0265800_101950	2778263103	B	0	2.77716	2.06221	2.22747	2.31413	2.84513	4.33474	LysR family transcriptional regulator
Ga0265800_101951	2778263104	B	2.03791	4.29862	2.53481	3.48526	5.37287	4.49753	5.3959	drug/metabolite transporter (DMT)-like permease
Ga0265800_101952	2778263105	B	0	2.5639	2.01584	2.8611	3.70312	4.47088	4.82152	CDP-diacylglycerol--glycerol-3-phosphate 3-phosphatidyltransferase
Ga0265800_101953	2778263106	B	0.792428	2.64652	1.09516	2.18583	3.06416	3.47034	3.30047	excinuclease ABC subunit C
Ga0265800_101954	2778263107	B	0	1.4722	0	1.09212	2.27504	1.20775	2.53698	uncharacterized repeat protein (TIGR03837 family)
Ga0265800_101955	2778263108	B	0.947446	2.08174	0.916579	1.14991	1.66527	1.53554	3.01597	lipid A ethanolaminephosphotransferase
Ga0265800_101956	2778263109	B	0	2.41932	0.691696	1.79473	2.41914	2.84767	5.2114	membrane-associated PAP2 superfamily phosphatase
Ga0265800_101957	2778263110	B	59.9168	61.4367	34.7328	90.1664	57.6291	58.4254	70.9051	translation elongation factor P (EF-P)
Ga0265800_101958	2778263111	B	15.1398	24.5213	9.41563	14.6762	10.6441	14.9162	22.8422	uncharacterized protein DUF3445
Ga0265800_101959	2778263112	B	5.13499	15.7957	5.14511	8.21533	7.446	8.58795	17.339	hypothetical protein
Ga0265800_101960	2778263113	B	1.96496	7.77139	4.34501	4.76973	5.35322	7.52115	8.59329	hypothetical protein
Ga0265800_101961	2778263114	B	7.04901	6.44309	2.53291	4.97767	6.5665	5.93098	7.6334	predicted MFS family arabinose efflux permease
Ga0265800_101962	2778263115	B	6.00384	4.74903	2.6552	4.17338	4.32656	6.08674	7.28749	DNA recombination protein RmuC
Ga0265800_101963	2778263116	B	0	4.58727	2.44325	3.25099	3.8471	6.09618	6.66194	gluconate 2-dehydrogenase
Ga0265800_101964	2778263117	B	9.16504	9.66603	9.49977	52.5842	34.634	161.181	42.5351	uncharacterized protein YjbJ (UPF0337 family)
Ga0265800_101965	2778263118	B	4.39477	6.56625	7.89581	29.579	29.739	90.6245	28.2409	acyl-CoA thioester hydrolase
Ga0265800_101966	2778263119	B	3.52348	5.41929	2.8	14.7732	15.1729	28.6135	18.187	acetoin utilization deacetylase AcuC-like enzyme
Ga0265800_101967	2778263120	B	398.804	145.208	361.264	786.127	929.499	675.583	1465.91	phasin family protein
Ga0265800_101968	2778263121	B	33.3136	31.9279	16.3334	56.3607	53.6739	49.2873	111.285	iron(III) transport system substrate-binding protein
Ga0265800_101969	2778263122	B	11.4138	14.044	6.46741	10.8304	15.2466	15.3498	28.9306	NAD(P)-dependent dehydrogenase (short-subunit alcohol dehydrogenase family)
Ga0265800_101970	2778263123	B	1.77251	4.98507	2.14345	2.93358	5.60778	4.58414	10.9947	gamma-glutamyltransferase 1
Ga0265800_101971	2778263124	B	3.54879	3.11898	1.59398	1.37046	2.80687	1.77442	2.95616	YihY family inner membrane protein
Ga0265800_101972	2778263125	B	0	4.61876	1.52287	1.87046	3.27758	2.74749	4.74075	tripartite-type tricarboxylate transporter receptor subunit TctC
Ga0265800_101973	2778263126	B	0.964087	4.57554	0.932678	2.60615	4.15157	4.05587	6.05184	fatty-acyl-CoA synthase
Ga0265800_101974	2778263127	B	0.843866	2.37332	0.816373	0.83798	2.0765	1.48406	3.21345	DNA primase
Ga0265800_101975	2778263128	B	26.2278	47.0822	18.0785	28.3238	34.6895	32.7852	51.4985	RNA polymerase RpoD-like sigma 70 subunit
Ga0265800_101976	2778263129	B	2.16282	11.0251	7.17381	7.99436	8.74337	6.63773	12.6115	enoyl-CoA hydratase/carnithine racemase
Ga0265800_101977	2778263130	B	5.29186	7.90661	2.55973	2.11658	3.13915	2.05291	4.68365	crotonobetainyl-CoA:carnitine CoA-transferase CaiB-like acyl-CoA transferase
Ga0265800_101978	2778263131	B	0	5.96231	1.8112	1.44599	3.38742	1.38233	2.38518	iron(III) transport system ATP-binding protein
Ga0265800_101979	2778263132	B	1.81151	4.93554	1.06401	0.299812	1.75119	0.593434	1.64372	iron(III) transport system permease protein
Ga0265800_101980	2778263133	B	6.30496	4.57161	1.41597	0.869581	1.93932	0.869662	3.00117	iron(III) transport system substrate-binding protein
Ga0265800_101981	2778263134	B	0	1.36651	0.613945	0.980302	0.585603	1.07231	1.652	enoyl-CoA hydratase/carnithine racemase
Ga0265800_101982	2778263135	B	1.607	3.10722	1.22151	1.41848	2.25963	1.21912	5.45018	propanol-preferring alcohol dehydrogenase
Ga0265800_101983	2778263136	B	0	1.56892	1.68211	1.52199	3.8507	2.12651	4.82797	aryl-alcohol dehydrogenase-like predicted oxidoreductase
Ga0265800_101984	2778263137	B	1.74926	1.22992	1.08789	1.25455	1.0761	0.663523	3.22653	4-carboxy-2-hydroxymuconate semialdehyde dehydrogenase
Ga0265800_101985	2778263138	B	0	0.866936	1.36324	1.95904	2.08049	0.816345	4.16707	protocatechuate 4,5-dioxygenase beta subunit
Ga0265800_101986	2778263139	B	0	1.7829	0.700895	1.11914	2.67415	1.57393	3.47018	protocatechuate 4,5-dioxygenase alpha subunit
Ga0265800_101987	2778263140	B	1.82016	1.1198	0.754655	0.702903	0.959756	0.878711	2.43675	2-pyrone-4,6-dicarboxylate hydrolase
Ga0265800_101988	2778263141	B	0	1.38093	0.54287	1.04018	2.48548	0.812715	2.89814	4-oxalomesaconate hydratase
Ga0265800_101989	2778263142	B	0	1.79589	0.706002	1.12729	3.14258	1.5854	4.93924	molybdate transport system substrate-binding protein
Ga0265800_101990	2778263143	B	0	0.992748	0.260179	1.14245	1.32356	0.714095	1.62421	LysR family transcriptional regulator
Ga0265800_101991	2778263144	B	1.87544	0.82415	1.29596	1.34504	1.31854	0.905398	1.89702	3-hydroxyisobutyrate dehydrogenase-like beta-hydroxyacid dehydrogenase
Ga0265800_101992	2778263145	B	0	1.215	0.318426	0.762659	0.809937	0.873962	1.09673	amino acid/amide ABC transporter ATP-binding protein 2 (HAAT family)
Ga0265800_101993	2778263146	B	0	0.399411	0.314032	0	2.39628	0.470128	0.946398	amino acid/amide ABC transporter ATP-binding protein 1 (HAAT family)
Ga0265800_101994	2778263147	B	0	0.909559	0.476754	0.380623	1.06107	0.356867	1.02628	amino acid/amide ABC transporter membrane protein 2 (HAAT family)
Ga0265800_101995	2778263148	B	1.94179	0.682644	0.670902	0.856997	1.19454	0.669591	2.1952	amino acid/amide ABC transporter membrane protein 1 (HAAT family)
Ga0265800_101996	2778263149	B	0	1.59259	0.28896	0.84588	1.83747	0.769054	2.11489	amino acid/amide ABC transporter substrate-binding protein (HAAT family)
Ga0265800_101997	2778263150	B	1.47726	1.55801	1.22497	1.46695	3.2456	1.83386	4.65854	5-methyltetrahydropteroyltriglutamate--homocysteine methyltransferase
Ga0265800_101998	2778263151	B	0	2.95953	1.62883	1.76482	2.36745	2.38041	6.8623	virginiamycin B lyase
Ga0265800_101999	2778263152	B	1.05016	7.4761	4.06381	3.36026	5.8143	3.5851	10.0288	subtilisin family serine protease
Ga0265800_1011000	2778263153	B	5.99385	10.009	5.79858	3.63736	11.5885	8.88756	27.9959	SPW repeat-containing protein
Ga0265800_1011001	2778263154	B	6.63369	7.77368	4.12558	7.80731	14.7689	8.99754	29.9977	NAD(P)-dependent dehydrogenase (short-subunit alcohol dehydrogenase family)
Ga0265800_1011002	2778263155	B	3.09781	5.536	8.56254	9.57041	21.6886	18.872	38.8302	signal transduction histidine kinase
Ga0265800_1011003	2778263156	B	8.33048	6.40635	9.78603	17.8086	28.2773	28.2594	35.4091	stage V sporulation protein R
Ga0265800_1011004	2778263157	B	22.8349	11.0381	19.3735	47.6609	63.2135	95.9343	88.0503	hypothetical protein
Ga0265800_1011005	2778263158	B	28.6068	13.2894	19.9372	56.499	75.6362	113.837	68.2304	putative serine protein kinase PrkA
Ga0265800_1011006	2778263159	B	0	1.19212	0.702969	0.486394	1.25163	1.23948	2.401	PAS domain S-box-containing protein
Ga0265800_1011007	2778263160	B	0	2.94017	0.67424	2.61454	2.08246	2.40329	7.17403	PAS domain S-box-containing protein
Ga0265800_1011008	2778263161	B	0	3.59976	0.369166	1.76837	2.81699	3.2546	7.09916	lactate dehydrogenase-like 2-hydroxyacid dehydrogenase
Ga0265800_1011009	2778263162	B	1.81484	1.99379	0.376224	2.05248	1.99364	1.6897	2.88855	dihydroxyacid dehydratase
Ga0265800_1011010	2778263163	B	0.84531	2.08021	0.642534	0.23317	1.93147	0.466384	2.69084	trans-feruloyl-CoA synthase
Ga0265800_1011011	2778263164	B	0	1.73356	0.454331	0.36272	1.34822	0.755738	3.39043	NAD(P)-dependent dehydrogenase (short-subunit alcohol dehydrogenase family)
Ga0265800_1011012	2778263165	B	0	4.19667	1.49981	0.87809	4.19635	1.69647	5.76835	amino acid/amide ABC transporter substrate-binding protein (HAAT family)
Ga0265800_1011013	2778263166	B	0	2.52584	0.551643	0.616576	2.94659	0.660678	4.17996	amino acid/amide ABC transporter membrane protein 1 (HAAT family)
Ga0265800_1011014	2778263167	B	0	1.97212	0.596367	0.333282	1.06183	0.595202	1.87429	amino acid/amide ABC transporter membrane protein 2 (HAAT family) /amino acid/amide ABC transporter ATP-binding protein 1 (HAAT family)
Ga0265800_1011015	2778263168	B	0	2.06349	0.48672	0.906684	1.65067	1.37635	3.07335	amino acid/amide ABC transporter ATP-binding protein 2 (HAAT family)
Ga0265800_1011016	2778263169	B	7.94173	2.79195	1.37196	2.19065	2.79174	1.36928	6.61548	MarR family transcriptional regulator
Ga0265800_1011017	2778263170	B	0	5.24897	1.37565	4.39307	4.08222	4.34771	6.90964	HxlR family transcriptional regulator
Ga0265800_1011018	2778263171	B	1.38607	4.99461	2.39449	3.28807	5.60328	3.63251	10.3089	fumarylacetoacetate (FAA) hydrolase family protein
Ga0265800_1011019	2778263172	B	18.4278	8.63784	3.82017	5.76089	10.2567	7.4136	12.0611	FKBP-type peptidyl-prolyl cis-trans isomerase FkpA
Ga0265800_1011020	2778263173	B	0	3.15179	1.39391	3.21489	3.5455	2.93695	8.46833	LytTR family two component transcriptional regulator
Ga0265800_1011021	2778263174	B	0	3.09733	0.63528	1.60608	2.28915	1.84928	3.69233	histidine kinase
Ga0265800_1011022	2778263175	B	0	8.13712	2.47654	5.93153	6.5617	8.239	8.35205	molecular chaperone GrpE
Ga0265800_1011023	2778263176	B	12.9066	12.336	4.40358	9.3899	8.36513	13.2684	10.6552	molecular chaperone DnaK
Ga0265800_1011024	2778263177	B	5.75416	6.32156	2.88275	4.84105	4.42476	7.1928	8.25977	molecular chaperone DnaJ
Ga0265800_1011025	2778263178	B	6.48269	9.11607	5.59955	4.8281	5.98197	8.15936	13.9824	lipid A ethanolaminephosphotransferase
Ga0265800_1011026	2778263179	B	0	4.52255	1.46415	2.50484	2.66012	2.29632	4.81775	DNA repair photolyase
Ga0265800_1011027	2778263180	B	0	2.76214	1.2065	1.02744	1.6367	1.24428	2.32013	cytochrome bd-I ubiquinol oxidase subunit 1 apoprotein
Ga0265800_1011028	2778263181	B	1.62284	2.99522	1.23355	1.52199	4.13594	2.51824	5.55217	cytochrome bd-I ubiquinol oxidase subunit 2 apoprotein
Ga0265800_1011029	2778263182	B	0	1.97762	2.39212	1.90978	3.95493	2.50682	6.79718	nitronate monooxygenase
Ga0265800_1011030	2778263183	B	2.62579	2.23085	1.93542	1.64174	3.23063	2.59565	5.96297	hypothetical protein
Ga0265800_1011031	2778263184	B	5.40079	7.12001	2.86122	4.17131	4.27168	6.7666	11.515	electron transfer flavoprotein alpha subunit apoprotein
Ga0265800_1011032	2778263185	B	6.94454	9.30278	4.57026	7.63137	7.89494	10.3514	13.954	electron transfer flavoprotein beta subunit
Ga0265800_1011033	2778263186	B	2.56355	2.14041	0.797153	1.55569	3.04141	1.85639	2.93623	mechanosensitive ion channel-like protein
Ga0265800_1011034	2778263187	B	0	3.48257	2.58601	2.55036	4.44961	3.11233	6.87657	enoyl-CoA hydratase/carnithine racemase
Ga0265800_1011035	2778263188	B	1.75548	4.6286	2.30482	4.55178	5.70818	5.69026	7.93831	acetoin utilization deacetylase AcuC-like enzyme
Ga0265800_1011036	2778263189	B	1.82689	1.92676	0.378723	2.01572	1.44496	2.2049	3.53277	MoxR-like ATPase
Ga0265800_1011037	2778263190	B	3.19323	1.40324	0.7723	1.23315	1.54345	2.20226	4.22746	uncharacterized protein (DUF58 family)
Ga0265800_1011038	2778263191	B	3.07118	1.88945	0.477502	1.18602	1.41698	1.48266	2.62683	transglutaminase superfamily protein
Ga0265800_1011039	2778263192	B	0	1.92748	0.663015	1.36112	1.68642	1.46524	3.50691	membrane-bound lytic murein transglycosylase B
Ga0265800_1011040	2778263193	B	0	3.42651	1.10932	1.64476	2.62008	3.08421	5.4582	hypothetical protein
Ga0265800_1011041	2778263194	B	0	3.98315	1.56585	2.78873	3.3701	3.1857	4.09672	uncharacterized alpha-E superfamily protein
Ga0265800_1011042	2778263195	B	1.07297	4.3379	1.48288	2.66372	3.58321	2.55297	4.0859	uncharacterized circularly permuted ATP-grasp superfamily protein
Ga0265800_1011043	2778263196	B	1.89903	5.5078	0.962322	1.64133	2.28083	2.35745	4.36905	competence protein ComEC
Ga0265800_1011044	2778263197	B	18.3927	4.84953	5.08386	3.04407	6.46555	3.1712	6.56623	hypothetical protein
Ga0265800_1011045	2778263198	B	14.5637	8.95987	4.02549	8.83794	2.55977	3.01322	7.36561	hypothetical protein
Ga0265800_1011046	2778263199	B	0	3.38589	2.07054	3.54223	4.51418	3.54256	5.85793	enamine deaminase RidA (YjgF/YER057c/UK114 family)
Ga0265800_1011047	2778263200	B	1.99892	4.39206	1.65754	2.6834	2.92782	3.44647	4.99533	DNA topoisomerase IV subunit A
Ga0265800_1011048	2778263201	B	4.10973	4.33438	2.12992	5.10133	2.5282	5.73954	5.74646	transglycosylase-like protein with SLT domain
Ga0265800_1011049	2778263202	B	3.28445	3.75265	1.81568	6.16068	2.30915	6.11595	5.17877	RimJ/RimL family protein N-acetyltransferase
Ga0265800_1011050	2778263203	B	0.797545	1.26171	0.771562	1.84796	2.94377	2.36517	3.32179	DNA topoisomerase IV subunit B
Ga0265800_1011051	2778263204	B	1.33368	2.10988	1.56671	3.31094	3.16457	3.63318	5.5548	predicted MFS family arabinose efflux permease
Ga0265800_1011052	2778263205	B	0	0	3.52849	5.63403	0	5.2824	2.27867	hypothetical protein
Ga0265800_1011053	2778263206	B	0	1.80395	1.41834	4.5294	1.80382	3.65689	4.98685	methyltransferase family protein
Ga0265800_1011054	2778263207	B	11.043	12.6172	5.21445	13.0983	13.5868	14.9146	20.4785	dihydrodipicolinate synthase
Ga0265800_1011055	2778263208	B	6.09117	10.3054	4.10386	10.2492	10.7061	13.0227	20.0693	Beta-barrel assembly machine subunit BamC
Ga0265800_1011056	2778263209	B	8.88469	9.37035	3.22321	6.12689	13.4689	10.9528	23.9871	phosphoribosyl 1,2-cyclic phosphodiesterase
Ga0265800_1011057	2778263210	B	7.40596	5.8581	9.21173	36.9758	38.0747	55.4178	76.2335	hypothetical protein
Ga0265800_1011058	2778263211	B	27.4924	7.12163	18.7977	65.0585	67.1417	118.553	139.258	50S ribosomal protein L16 3-hydroxylase
Ga0265800_1011059	2778263212	B	76.0524	24.5085	43.0437	167.227	147.676	301.217	258.04	FKBP-type peptidyl-prolyl cis-trans isomerase SlyD
Ga0265800_1011060	2778263213	B	62.0209	39.1184	58.7398	290.833	243.349	600.843	393.989	glycine zipper 2TM protein
Ga0265800_1011061	2778263214	B	0	2.3175	1.21474	3.39431	4.24843	3.33401	4.96831	dUTP pyrophosphatase
Ga0265800_1011062	2778263215	B	2.55031	3.13801	1.76231	2.18079	4.14634	3.29787	5.80422	phosphopantothenoylcysteine decarboxylase/phosphopantothenate--cysteine ligase
Ga0265800_1011063	2778263216	B	0.942026	8.77609	4.10101	8.21121	9.43772	10.135	16.4509	CTP synthase
Ga0265800_1011064	2778263217	B	0	5.43664	2.13725	6.82521	10.8725	9.59884	8.28132	hypothetical protein
Ga0265800_1011065	2778263218	B	1.98072	7.48554	3.96924	6.33779	6.7887	7.58147	9.84073	2-dehydro-3-deoxyphosphooctonate aldolase (KDO 8-P synthase)
Ga0265800_1011066	2778263219	B	8.01832	6.34247	0.554078	2.21178	7.75132	8.01843	5.7251	uncharacterized protein (DUF1330 family)
Ga0265800_1011067	2778263220	B	8.83488	5.21354	3.05252	4.8044	5.21315	5.83197	10.1381	enolase
Ga0265800_1011068	2778263221	B	0	6.05376	4.23085	5.48884	6.72589	6.59778	11.612	cell division protein FtsB
Ga0265800_1011069	2778263222	B	2.84881	4.00605	2.55914	3.77192	5.5079	5.01005	12.2044	nicotinamide riboside kinase
Ga0265800_1011070	2778263223	B	4.11392	6.14663	2.38793	4.53914	4.6277	6.1284	9.5219	anthranilate/para-aminobenzoate synthase component I
Ga0265800_1011071	2778263224	B	1.65547	6.11088	2.40231	4.93177	5.38299	6.45072	10.7366	tripartite-type tricarboxylate transporter receptor subunit TctC
Ga0265800_1011072	2778263225	B	0	3.39916	3.81793	3.96252	5.34113	3.61995	9.20486	isochorismate pyruvate lyase
Ga0265800_1011073	2778263226	B	3.24568	4.13625	2.57924	5.19268	4.27856	5.31628	8.78691	molecular chaperone Hsp33
Ga0265800_1011074	2778263227	B	7.13842	5.33278	3.45293	9.64841	10.3511	11.9386	13.1669	carbonic anhydrase/acetyltransferase-like protein (isoleucine patch superfamily)
Ga0265800_1011075	2778263228	B	0	3.12345	1.22789	2.32822	3.12321	2.52758	5.48465	uncharacterized ferritin-like protein (DUF455 family)
Ga0265800_1011076	2778263229	B	0	7.85529	1.02936	4.109	5.23646	7.70509	11.9655	hypothetical protein
Ga0265800_1011077	2778263230	B	9.5734	6.52079	3.80383	3.56498	9.46495	6.51991	12.1044	trypsin-like peptidase
Ga0265800_1011078	2778263231	B	1.68944	3.86055	2.33486	4.10094	4.1572	5.0684	7.03655	tripartite-type tricarboxylate transporter receptor subunit TctC
Ga0265800_1011079	2778263232	B	3.72262	1.47229	0.643096	1.43759	1.79933	2.63154	4.09769	integrase/recombinase XerD
Ga0265800_1011080	2778263233	B	3.43766	1.66172	2.01916	4.74123	4.83374	4.32678	7.36351	tripartite-type tricarboxylate transporter receptor subunit TctC
Ga0265800_1011081	2778263234	B	1.70695	1.50022	0.707719	2.07172	5.85041	1.76584	13.2541	hypothetical protein
Ga0265800_1011082	2778263235	B	0.69149	1.884	1.6724	3.77666	17.6839	4.19669	37.3174	PAS domain S-box-containing protein
Ga0265800_1011083	2778263236	B	0	2.08465	2.40392	3.31498	3.89106	4.85298	7.76216	epoxyqueuosine reductase
Ga0265800_1011084	2778263237	B	0	6.29195	2.78268	4.44317	9.83043	6.48023	25.4246	tRNA threonylcarbamoyladenosine biosynthesis protein TsaE
Ga0265800_1011085	2778263238	B	2.4799	6.97456	2.48479	4.44636	4.46774	3.89093	9.07461	N-acetylmuramoyl-L-alanine amidase
Ga0265800_1011086	2778263239	B	125.353	41.6202	99.1329	443.36	379.45	1392.35	522.512	osmotically inducible lipoprotein OsmB
Ga0265800_1011087	2778263240	B	31.2643	15.4562	26.7351	120.089	106.125	286.369	148.005	salicylate 5-hydroxylase small subunit
Ga0265800_1011088	2778263241	B	12.3376	5.20479	8.86646	31.5136	45.2132	46.9685	50.3217	salicylate 5-hydroxylase large subunit
Ga0265800_1011089	2778263242	B	4.78021	2.10063	3.82227	7.04495	14.9433	9.70184	24.5214	hemoglobin/transferrin/lactoferrin receptor protein
Ga0265800_1011090	2778263243	B	4.51223	1.90355	2.18261	2.24038	14.6721	2.92521	21.4514	dissimilatory nitrite reductase (NO-forming) cytochrome cd1 type apoprotein
Ga0265800_1011091	2778263244	B	9.51559	4.77893	2.06656	3.74969	5.97321	5.43756	13.6692	cytochrome d1-like heme-containing protein
Ga0265800_1011092	2778263245	B	5.35776	7.76962	2.5916	4.28587	4.23765	5.26546	9.24484	membrane-associated protein
Ga0265800_1011093	2778263246	B	0.835304	3.7441	2.02023	3.45616	4.4779	3.77333	8.22548	DNA mismatch repair protein MutL
Ga0265800_1011094	2778263247	B	2.40154	15.0913	2.73817	5.96197	8.9697	9.52347	11.2527	glutamate dehydrogenase/leucine dehydrogenase
Ga0265800_1011095	2778263248	B	0	3.08598	0.808772	1.61423	3.60003	2.62337	7.48628	hypothetical protein
Ga0265800_1011096	2778263249	B	2.26813	2.32567	1.04488	3.67044	2.12617	4.51026	5.17326	iron complex outermembrane receptor protein
Ga0265800_1011097	2778263250	B	6.08862	22.2967	8.27441	22.6171	16.5875	29.3938	30.0688	hypothetical protein
Ga0265800_1011098	2778263251	B	27.5961	18.1904	10.4881	20.0452	18.189	17.1289	28.4609	SnoaL-like protein
Ga0265800_1011099	2778263252	B	5.1956	7.39747	2.58497	4.93005	4.74863	4.15654	8.8723	acyl-CoA synthetase (AMP-forming)/AMP-acid ligase II
Ga0265800_1011100	2778263253	B	6.29553	7.19297	2.46517	4.51506	3.31958	6.87453	8.36575	Ig-like domain-containing protein
Ga0265800_1011101	2778263254	B	2.23682	4.61988	1.73888	4.59668	3.09607	5.26431	6.57138	Ig-like domain-containing protein
Ga0265800_1011102	2778263255	B	0	2.17744	1.31385	3.97321	4.40518	11.2055	6.63352	excinuclease ABC subunit A
Ga0265800_1011103	2778263256	B	0	2.19718	1.72751	6.8959	3.29552	20.6896	7.06554	hypothetical protein
Ga0265800_1011104	2778263257	B	0	0.916911	1.80228	1.87053	3.66736	1.61888	4.34521	methyltransferase family protein
Ga0265800_1011105	2778263258	B	0	2.22805	1.00102	0.59938	2.22788	1.37371	1.18515	TonB-like protein
Ga0265800_1011106	2778263259	B	0	1.61198	1.26741	1.57399	4.1192	1.6163	3.63769	ubiquinone/menaquinone biosynthesis C-methylase UbiE
Ga0265800_1011107	2778263260	B	0	1.04995	1.65103	1.48288	2.88715	2.78066	3.99832	uncharacterized peroxidase-related enzyme
Ga0265800_1011108	2778263261	B	13.2718	6.41541	3.20985	5.12525	5.83175	7.32246	3.94837	phage-related protein
Ga0265800_1011109	2778263262	B	15.3066	5.38112	3.70199	10.1332	8.74365	10.5565	8.8798	helix-turn-helix protein
Ga0265800_1011110	2778263263	B	2.71874	9.55785	3.09984	5.62453	5.01749	5.48443	9.98903	hypothetical protein
Ga0265800_1011111	2778263264	B	2.11649	4.65039	2.19379	1.75144	2.79002	2.33547	5.91879	AraC family transcriptional regulator
Ga0265800_1011112	2778263265	B	0	1.64291	0.602803	0.275003	1.64279	0.386759	1.48299	UDP:flavonoid glycosyltransferase YjiC (YdhE family)
Ga0265800_1011113	2778263266	B	0	1.39481	0.996956	2.3082	2.28224	2.93527	3.04744	glycerophosphoryl diester phosphodiesterase
Ga0265800_1011114	2778263267	B	2.93695	2.06499	1.01474	1.86329	2.7101	2.37997	2.92704	hypothetical protein
Ga0265800_1011115	2778263268	B	0	1.38785	0.909319	0.871159	1.85033	1.04367	2.85785	DHA1 family bicyclomycin/chloramphenicol resistance-like MFS transporter
Ga0265800_1011116	2778263269	B	0	0.453197	0.356322	0.948246	0.755272	0.65198	1.68747	tRNA dimethylallyltransferase
Ga0265800_1011117	2778263270	B	0	0.946906	0.558372	0.594377	0.946835	0.4644	1.04171	putative ABC transport system ATP-binding protein
Ga0265800_1011118	2778263271	B	0	0.872117	0.51427	0.684289	1.01739	0.684353	1.10704	hypothetical protein
Ga0265800_1011119	2778263272	B	0	5.9629	2.60459	2.49529	4.63746	6.75871	6.95237	DNA-binding PadR family transcriptional regulator
Ga0265800_1011120	2778263273	B	2.22117	1.95216	1.53486	3.43106	3.90402	4.74878	7.59921	3-dehydroquinate dehydratase
Ga0265800_1011121	2778263274	B	1.73696	2.90053	0.960214	2.58727	3.35825	3.95314	6.25266	threonine dehydratase
Ga0265800_1011122	2778263275	B	23.6352	10.0401	8.43834	30.6418	25.2715	70.4991	28.0088	hemerythrin HHE cation binding domain-containing protein
Ga0265800_1011123	2778263276	B	7.31492	4.07169	3.20132	14.4605	11.9463	24.9509	17.8267	putative ABC transport system permease protein
Ga0265800_1011124	2778263277	B	4.71368	1.51902	1.52004	3.98735	4.83289	3.95521	7.71279	predicted secreted hydrolase
Ga0265800_1011125	2778263278	B	1.86131	4.41687	1.80067	2.87517	5.56157	8.7932	9.46898	DNA ligase D
Ga0265800_1011126	2778263279	B	6.2295	4.03783	1.50664	3.2219	5.81677	6.92773	6.94981	carbohydrate binding protein
Ga0265800_1011127	2778263280	B	0	3.22717	0.845775	6.75235	7.52948	18.5707	8.01085	phosphatidylethanolamine-binding protein
Ga0265800_1011128	2778263281	B	0	4.04484	2.38516	5.71266	7.07793	19.044	13.0071	hypothetical protein
Ga0265800_1011129	2778263282	B	1.75053	5.61558	2.78217	2.89719	4.76903	4.3462	6.92642	ATP-binding cassette subfamily B protein
Ga0265800_1011130	2778263283	B	0	5.15894	2.4961	4.98198	7.53941	6.22805	9.40309	hypothetical protein
Ga0265800_1011131	2778263284	B	0	0.551657	0.867468	1.03883	2.75807	1.19044	2.33418	ADP-ribose pyrophosphatase
Ga0265800_1011132	2778263285	B	2.1413	3.38752	1.40569	2.36262	3.76363	2.25209	3.59927	NADH dehydrogenase subunit N
Ga0265800_1011133	2778263286	B	2.17428	2.67533	2.55419	2.39902	3.15282	2.69915	3.46066	NADH dehydrogenase subunit M
Ga0265800_1011134	2778263287	B	2.3178	2.5124	2.56261	2.4295	3.19118	2.07805	4.20624	NADH dehydrogenase subunit L
Ga0265800_1011135	2778263288	B	14.8536	2.61092	4.61883	2.04861	0	1.2805	5.9656	NADH dehydrogenase subunit K
Ga0265800_1011136	2778263289	B	2.81633	2.97028	3.1138	3.10743	5.1976	2.71925	4.52445	NADH dehydrogenase subunit J
Ga0265800_1011137	2778263290	B	10.7076	4.3917	3.20629	2.55978	4.0777	2.83079	5.84014	NADH dehydrogenase subunit I
Ga0265800_1011138	2778263291	B	7.66119	5.38665	3.81168	3.21216	5.38625	3.48721	5.60687	NADH dehydrogenase subunit H
Ga0265800_1011139	2778263292	B	11.6854	9.69243	6.25795	6.72864	6.61089	7.83234	13.2538	NADH dehydrogenase subunit G
Ga0265800_1011140	2778263293	B	12.9565	19.4619	8.62758	10.072	8.28104	8.69195	14.8576	NADH dehydrogenase subunit F
Ga0265800_1011141	2778263294	B	14.1744	20.8667	7.10119	8.21074	10.2768	8.92024	15.8134	NADH dehydrogenase subunit E
Ga0265800_1011142	2778263295	B	27.1995	30.5077	13.6937	16.9347	12.8624	15.8108	21.1931	NADH dehydrogenase subunit D
Ga0265800_1011143	2778263296	B	47.4984	51.1384	19.0778	23.0922	26.6108	21.9069	36.3869	NADH dehydrogenase subunit C
Ga0265800_1011144	2778263297	B	56.0426	74.938	24.0656	38.8678	43.6226	36.1659	54.7818	NADH dehydrogenase subunit B
Ga0265800_1011145	2778263298	B	62.7913	78.1807	36.5197	46.1876	50.5837	62.0704	62.5796	NADH dehydrogenase subunit A
Ga0265800_1011147	2778263300	B	42.5835	20.3764	14.059	20.6212	15.8009	15.8263	31.9531	protein translocase subunit secG
Ga0265800_1011148	2778263301	B	30.2347	40.6769	24.589	29.6388	20.6435	27.6687	48.8489	triosephosphate isomerase
Ga0265800_1011149	2778263302	B	60.6126	46.0207	26.9921	44.9566	32.5524	45.402	72.3296	putative PIG3 family NAD(P)H quinone oxidoreductase
Ga0265800_1011150	2778263303	B	98.3542	74.3979	38.2865	49.5576	49.3259	57.3176	81.6758	polyribonucleotide nucleotidyltransferase
Ga0265800_1011151	2778263304	B	28.4928	45.9102	29.5334	49.7766	75.1201	49.4537	101.155	SSU ribosomal protein S15P
Ga0265800_1011152	2778263305	B	1.4179	3.36465	1.17574	4.61513	4.48587	5.13383	5.69464	aspartate/methionine/tyrosine aminotransferase
Ga0265800_1011153	2778263306	B	6.75965	6.53506	2.42893	5.14625	2.85145	5.1747	5.95257	amino acid/amide ABC transporter substrate-binding protein (HAAT family)
Ga0265800_1011154	2778263307	B	0	12.6254	8.01765	12.4972	12.6245	23.0533	21.0397	HSP20 family molecular chaperone IbpA
Ga0265800_1011155	2778263308	B	9.6735	10.4857	3.34227	5.95929	8.35957	10.5076	11.0319	O-sialoglycoprotein endopeptidase
Ga0265800_1011156	2778263309	B	0	3.75567	0.787429	0.628653	2.50359	1.47354	3.89861	response regulator receiver and ANTAR domain protein
Ga0265800_1011157	2778263310	B	1.23995	5.01296	5.05526	3.76231	10.8969	3.07854	20.8052	nitrate/nitrite transport system substrate-binding protein
Ga0265800_1011158	2778263311	B	0	7.05254	5.40975	5.07475	17.716	4.25185	46.6391	nitrate/nitrite transport system permease protein
Ga0265800_1011159	2778263312	B	3.86837	7.81967	7.08372	6.40231	20.9075	5.20236	34.1225	nitrate/nitrite transport system ATP-binding protein
Ga0265800_1011160	2778263313	B	1.85854	7.51386	6.54983	11.3811	25.861	6.96429	50.2419	assimilatory nitrite reductase (NAD(P)H) large subunit precursor
Ga0265800_1011161	2778263314	B	0	6.24584	10.2307	18.6226	35.9109	9.18962	65.0118	assimilatory nitrite reductase (NAD(P)H) small subunit
Ga0265800_1011162	2778263315	B	0.552327	4.07763	4.23649	8.98888	12.8144	5.06624	29.1993	assimilatory nitrate reductase (NADH) alpha subunit apoprotein
Ga0265800_1011163	2778263316	B	0	2.96694	1.42555	3.82818	3.95562	2.2635	9.37349	anthranilate phosphoribosyltransferase
Ga0265800_1011164	2778263317	B	4.50309	9.69636	3.73404	10.3097	12.6637	12.1896	27.5973	uroporphyrinogen-III C-methyltransferase
Ga0265800_1011165	2778263318	B	2.63886	5.56623	3.64699	2.83883	4.52222	4.41334	9.53854	hypothetical protein
Ga0265800_1011166	2778263319	B	66.6517	60.9224	32.2401	63.2452	82.0047	54.2415	109.456	SSU ribosomal protein S21P
Ga0265800_1011167	2778263320	B	26.3686	35.1488	14.8806	21.5781	30.5115	28.036	44.9762	hypothetical protein
Ga0265800_1011168	2778263321	B	12.8645	19.4265	7.83897	9.29074	15.9306	11.8161	24.5985	PmbA protein
Ga0265800_1011169	2778263322	B	16.6138	17.2786	6.6969	9.31828	13.8705	8.498	21.7476	ribosome-associated protein
Ga0265800_1011170	2778263323	B	9.12529	15.7728	8.61781	10.7397	14.1678	16.7824	22.8042	molybdopterin adenylyltransferase
Ga0265800_1011171	2778263324	B	11.156	17.4527	6.7839	13.9093	20.7848	20.3889	22.3696	serine O-acetyltransferase
Ga0265800_1011172	2778263325	B	0	6.52079	2.14999	1.18833	3.36532	2.47591	8.33068	tRNA/rRNA methyltransferase
Ga0265800_1011173	2778263326	B	10.4241	8.24545	2.16097	1.72523	2.74828	1.07837	9.30356	biotin-dependent enzyme
Ga0265800_1011174	2778263327	B	37.5319	26.5461	22.7241	26.2271	38.6382	38.3953	59.1787	myo-inositol-1(or 4)-monophosphatase
Ga0265800_1011175	2778263328	B	41.991	21.3524	27.3583	29.9498	35.5846	43.1293	65.7188	small-conductance mechanosensitive channel
Ga0265800_1011176	2778263329	B	14.2261	9.11685	9.83044	7.78285	12.2417	10.404	23.0483	DNA mismatch repair protein MutS
Ga0265800_1011177	2778263330	B	8.2538	3.26437	6.27385	4.89497	5.07752	4.8385	9.33095	putative proteasome-type protease
Ga0265800_1011178	2778263331	B	12.8087	3.75247	3.83544	3.17984	3.75218	2.5765	7.74823	pimeloyl-ACP methyl ester carboxylesterase
Ga0265800_1011179	2778263332	B	0.929617	1.63405	2.05561	1.53855	1.71563	1.18608	3.26343	hypothetical protein
Ga0265800_1011180	2778263333	B	2.29335	2.41871	3.16948	5.94643	6.85251	21.3522	8.86957	triacylglycerol esterase/lipase EstA (alpha/beta hydrolase family)
Ga0265800_1011181	2778263334	B	0	2.73172	2.29097	6.97315	7.10192	12.5043	8.5687	undecaprenyl-diphosphatase
Ga0265800_1011182	2778263335	B	26.0899	16.051	8.11282	48.2174	50.4422	151.143	65.1988	uncharacterized protein YjbJ (UPF0337 family)
Ga0265800_1011183	2778263336	B	12.5961	6.03848	5.93462	27.1644	29.3851	58.48	42.6518	hydroxyacylglutathione hydrolase
Ga0265800_1011184	2778263337	B	6.59716	4.29063	4.37639	8.37091	11.5954	12.4665	15.4658	putative ABC transport system permease protein
Ga0265800_1011185	2778263338	B	0	5.72338	4.17852	7.95502	13.081	7.53872	12.7312	putative ABC transport system ATP-binding protein
Ga0265800_1011186	2778263339	B	2.90929	11.5062	4.08774	12.5725	9.11905	13.1756	15.4928	HlyD family secretion protein
Ga0265800_1011187	2778263340	B	40.0916	24.6652	12.1897	79.1815	21.14	98.9862	31.4881	2TM domain-containing protein
Ga0265800_1011188	2778263341	B	15.7863	14.568	15.2719	63.5754	32.6022	82.7429	36.3973	2TM domain-containing protein
Ga0265800_1011189	2778263342	B	9.54884	14.9663	6.59839	42.4945	16.3638	37.7569	25.8512	histidine kinase/DNA gyrase B/HSP90-like ATPase
Ga0265800_1011190	2778263343	B	8.61359	6.43481	5.2081	27.5613	10.2192	19.7521	20.2442	LytTR family two component transcriptional regulator
Ga0265800_1011191	2778263344	B	7.89313	14.568	5.45427	28.7396	25.6655	30.4842	44.6161	2TM domain-containing protein
Ga0265800_1011192	2778263345	B	5.29852	8.45985	4.02749	9.69492	9.54571	15.2563	18.4692	pyruvate dehydrogenase (quinone)
Ga0265800_1011193	2778263346	B	11.4335	10.0488	7.90075	56.7689	37.6801	44.552	59.0159	PXPV repeat-containing protein
Ga0265800_1011194	2778263347	B	7.09004	2.49254	2.08221	3.12915	5.60778	4.30909	6.67065	glutaminyl-tRNA synthetase
Ga0265800_1011195	2778263348	B	3.55053	1.56025	1.22673	1.37113	2.39221	2.16299	2.2182	NACHT domain-containing protein
Ga0265800_1011196	2778263349	B	0	2.44243	1.45946	1.28783	1.9538	2.06991	1.91808	hypothetical protein
Ga0265800_1011197	2778263350	B	3.64829	1.92386	2.01682	1.61015	2.88557	1.76127	3.03903	tripartite tricarboxylate transporter family receptor
Ga0265800_1011198	2778263351	B	0	0	2.33254	0	0	0	0	hypothetical protein
Ga0265800_1011199	2778263352	B	0	5.26774	0.828342	0.661317	1.05347	2.06681	1.06987	hypothetical protein
Ga0265800_1021	2778263353	B	0	0.912095	1.43425	2.00384	5.01614	1.43145	4.32239	5-methylcytosine-specific restriction protein A
Ga0265800_1022	2778263354	B	6.99706	1.38366	1.81315	4.14965	6.14915	5.42883	11.2929	integron integrase
Ga0265800_1023	2778263355	B	8.39816	2.1323	4.44916	14.8259	23.2895	25.0661	25.8174	methyl-accepting chemotaxis sensory transducer
Ga0265800_1024	2778263356	B	27.9378	4.91082	5.01941	32.3667	36.8284	63.3907	49.038	hypothetical protein
Ga0265800_1025	2778263357	B	8.69689	2.80265	4.20678	29.4272	18.598	23.292	32.1692	hypothetical protein
Ga0265800_1026	2778263358	B	5.46403	5.28248	5.28601	39.1872	24.4897	45.0317	48.4415	hypothetical protein
Ga0265800_1027	2778263359	B	8.5024	11.0221	6.6097	75.2842	41.0964	98.7318	82.6505	uncharacterized protein YcfJ
Ga0265800_1028	2778263360	B	5.30856	3.59919	1.83415	3.55619	3.9988	4.60256	6.3849	PAS domain S-box-containing protein
Ga0265800_1029	2778263361	B	4.28053	1.88105	0.591582	1.41689	2.63327	1.47607	2.16489	putative acetyltransferase
Ga0265800_10210	2778263362	B	0	2.56083	1.23903	3.33854	4.53036	9.97018	7.26809	exodeoxyribonuclease-3
Ga0265800_10211	2778263363	B	2.749	2.41606	1.99458	5.45965	5.91889	12.1337	9.77307	alanine-glyoxylate transaminase/serine-glyoxylate transaminase/serine-pyruvate transaminase
Ga0265800_10212	2778263364	B	14.7599	5.18892	8.15947	39.8996	31.9959	124.528	65.8665	hypothetical protein
Ga0265800_10213	2778263365	B	22.0526	7.42965	7.87331	26.7651	31.6544	71.1015	49.3143	deoxypyrimidine-specific 5' nucleotidase type C protein (NT5C)
Ga0265800_10214	2778263366	B	13.4967	6.52414	6.99483	18.0563	26.6877	43.0505	42.4617	uncharacterized protein (DUF924 family)
Ga0265800_10215	2778263367	B	0	11.3526	12.1716	23.3216	53.6626	41.7075	65.6773	hypothetical protein
Ga0265800_10216	2778263368	B	9.25938	7.52759	2.07947	6.25757	16.4781	14.6077	30.9212	hypothetical protein
Ga0265800_10217	2778263369	B	9.12529	7.48542	5.88533	13.2568	14.7024	12.4819	26.7859	c(7)-type cytochrome triheme protein
Ga0265800_10218	2778263370	B	6.0463	10.3623	6.47603	15.5107	19.926	22.9346	31.3887	ATP-dependent Clp protease protease subunit
Ga0265800_10219	2778263371	B	2.10392	5.42404	4.45844	14.7021	12.3881	27.303	15.7731	Ig-like domain-containing protein
Ga0265800_10220	2778263372	B	11.86	3.95	7.07396	21.4884	11.4102	29.2953	21.1331	cellulase (glycosyl hydrolase family 5)
Ga0265800_10221	2778263373	B	5.14043	3.27545	4.44015	12.9741	7.67977	11.7877	15.7899	3-isopropylmalate dehydratase large subunit
Ga0265800_10222	2778263374	B	3.75934	1.98242	2.33798	2.07395	1.98227	1.81488	5.92756	3-isopropylmalate dehydratase small subunit
Ga0265800_10223	2778263375	B	0	2.74784	2.16046	1.72483	1.90221	2.65383	3.72055	nitroreductase
Ga0265800_10224	2778263376	B	0	1.52994	1.33655	1.38717	1.52982	1.60073	3.39499	halocarboxylic acid dehydrogenase DehI
Ga0265800_10225	2778263377	B	0	1.97885	1.08909	0.621066	1.38509	1.31989	2.74633	branched-chain amino acid transport system ATP-binding protein
Ga0265800_10226	2778263378	B	0	1.84804	0.484333	0.773346	2.46386	1.45016	1.62645	amino acid/amide ABC transporter substrate-binding protein (HAAT family)
Ga0265800_10227	2778263379	B	1.74309	0.919188	0.240901	0.384652	0.612745	0.420752	2.02243	hydroxymethylglutaryl-CoA lyase
Ga0265800_10228	2778263380	B	0	1.95959	0.17119	0.410014	0.653147	0.768848	1.32663	amino acid/amide ABC transporter ATP-binding protein 1 (HAAT family)
Ga0265800_10229	2778263381	B	1.66664	1.02535	0	0.275836	0.878807	0.804597	1.1404	branched-chain amino acid transport system permease protein
Ga0265800_10230	2778263382	B	0	0.345395	0.271563	0.542015	0.518053	0.813098	1.1107	amino acid/amide ABC transporter membrane protein 1 (HAAT family)
Ga0265800_10231	2778263383	B	0	0.827207	0.278736	0.370887	0.590817	0.602747	1.04003	crotonobetainyl-CoA:carnitine CoA-transferase CaiB-like acyl-CoA transferase
Ga0265800_10232	2778263384	B	1.93418	0.679971	0.133655	0.106705	0.67992	0.133394	1.15084	citrate lyase subunit beta/citryl-CoA lyase
Ga0265800_10233	2778263385	B	0	0.450613	0.0885725	0.141426	0.563224	0.220999	1.22025	crotonobetainyl-CoA:carnitine CoA-transferase CaiB-like acyl-CoA transferase
Ga0265800_10234	2778263386	B	0	1.05721	0.831221	1.10603	2.11426	1.38266	2.86291	GntR family transcriptional regulator
Ga0265800_10235	2778263387	B	0	0.16483	0.388787	1.34504	1.15372	0.582042	1.45066	citrate lyase subunit beta/citryl-CoA lyase
Ga0265800_10236	2778263388	B	0	0.755329	0.475096	0.758597	1.51054	1.24469	1.89201	beta-methylmalyl-CoA/L-malyl-CoA lyase
Ga0265800_10237	2778263389	B	0	2.74848	0	2.30031	0.916092	2.5162	2.79107	hypothetical protein
Ga0265800_10238	2778263390	B	1.78079	2.66069	1.47667	2.0631	3.75599	3.80727	5.56277	hypothetical protein
Ga0265800_10239	2778263391	B	0	2.85727	1.49767	1.79352	4.76175	3.73685	4.51351	hypothetical protein
Ga0265800_10240	2778263392	B	18.0124	14.2478	3.73405	7.94967	10.2893	14.2859	11.5212	uncharacterized membrane protein YkvA (DUF1232 family)
Ga0265800_10241	2778263393	B	6.01847	8.2517	2.9112	5.24603	6.13542	6.47514	11.2085	TldD protein
Ga0265800_10242	2778263394	B	3.76713	6.1803	2.34283	4.01795	4.74523	4.41669	10.1612	predicted Zn-dependent protease
Ga0265800_10243	2778263395	B	0	4.80436	1.71699	3.28987	3.93054	3.94136	10.4968	two-component system chemotaxis response regulator CheY
Ga0265800_10244	2778263396	B	0	8.05503	1.89995	4.04494	8.85986	4.42456	12.2697	hypothetical protein
Ga0265800_10245	2778263397	B	3.37418	2.66897	1.86529	1.30303	2.07571	1.86164	3.91491	hypothetical protein
Ga0265800_10246	2778263398	B	0	6.39899	2.93483	4.68612	3.73246	7.11352	9.92771	hypothetical protein
Ga0265800_10247	2778263399	B	2.75667	5.33015	1.9049	2.73744	4.60297	3.04188	5.08469	predicted MFS family arabinose efflux permease
Ga0265800_10248	2778263400	B	0	4.56136	0.652059	1.82203	1.65855	1.22022	2.52657	VCBS repeat protein
Ga0265800_10249	2778263401	B	1.38997	3.29839	1.15259	1.687	2.19876	1.67757	3.6803	VCBS repeat protein
Ga0265800_10250	2778263402	B	0	8.20507	1.38239	2.64876	5.27429	4.55297	8.64962	diaminopropionate ammonia-lyase
Ga0265800_10251	2778263403	B	0	9.46742	3.98768	5.09378	12.1715	5.83717	14.1923	SnoaL-like protein
Ga0265800_10252	2778263404	B	1.71287	7.5271	1.89379	5.19727	7.97812	4.19364	12.179	tripartite-type tricarboxylate transporter receptor subunit TctC
Ga0265800_10253	2778263405	B	3.36737	4.58727	0.814415	3.06522	3.10727	3.07712	6.81221	predicted deacylase
Ga0265800_10254	2778263406	B	10.9531	18.0497	10.5963	24.6236	31.5245	33.143	71.6883	LuxR family two component transcriptional regulator
Ga0265800_10255	2778263407	B	1.23995	7.51945	4.45548	10.0556	9.15341	9.36389	17.1532	hypothetical protein
Ga0265800_10256	2778263408	B	0	3.77648	1.84296	1.9618	5.20854	4.08747	6.39165	two-component system chemotaxis response regulator CheB
Ga0265800_10257	2778263409	B	2.14348	4.3957	1.48117	1.53727	4.33258	3.57251	6.24933	two-component system chemotaxis sensor kinase CheA
Ga0265800_10258	2778263410	B	0	4.17633	0.871158	2.461	2.81242	3.77879	4.41414	methyl-accepting chemotaxis protein
Ga0265800_10259	2778263411	B	3.62154	2.54634	1.00102	2.79711	4.45575	3.12206	6.89544	purine-binding chemotaxis protein CheW
Ga0265800_10260	2778263412	B	0	5.95751	0.986111	5.90456	5.85255	5.70007	11.4982	CheR-type MCP methyltransferase
Ga0265800_10261	2778263413	B	4.31794	10.2464	6.2659	14.7692	14.7993	22.0367	38.7947	purine-binding chemotaxis protein CheW
Ga0265800_10262	2778263414	B	0	1.78912	0.937784	1.24782	2.78286	1.55992	3.56639	hypothetical protein
Ga0265800_10263	2778263415	B	2.02954	1.60536	0.280489	1.56752	2.6754	1.32972	4.46805	ribosomal protein S18 acetylase RimI-like enzyme
Ga0265800_10264	2778263416	B	0	1.32635	1.56424	1.66511	3.09458	2.51524	3.96587	aspartate racemase
Ga0265800_10265	2778263417	B	1.62819	3.86368	1.01259	2.2456	2.71868	1.7405	5.57047	tripartite-type tricarboxylate transporter receptor subunit TctC
Ga0265800_10266	2778263418	B	1.69524	5.8107	1.64001	2.05751	2.68166	3.21515	8.1198	tripartite-type tricarboxylate transporter receptor subunit TctC
Ga0265800_10267	2778263419	B	1.82689	2.56901	0.631205	0.50393	1.60551	1.38594	4.02192	2,3-dimethylmalate lyase
Ga0265800_10268	2778263420	B	7.90799	1.62172	1.45721	1.59965	1.15828	1.81795	3.92106	nicotinamidase-related amidase
Ga0265800_10269	2778263421	B	0	1.91716	0.579749	0.9257	1.91702	1.67799	2.49598	tripartite-type tricarboxylate transporter receptor subunit TctC
Ga0265800_10270	2778263422	B	0	0.7195	0.646513	0.258076	1.33611	0.362953	1.21775	uncharacterized protein DUF1446
Ga0265800_10271	2778263423	B	0	1.32509	0	0.831764	0	0.519901	1.12135	uncharacterized protein DUF4387
Ga0265800_10272	2778263424	B	0	0.598021	0.117547	0.469225	0.896963	0.469269	1.36639	tripartite-type tricarboxylate transporter receptor subunit TctC
Ga0265800_10273	2778263425	B	0	1.30947	0.800769	0.365317	0.727431	0.856291	1.47751	L-asparaginase
Ga0265800_10274	2778263426	B	0	0.456048	0.179281	1.00192	2.28007	1.07359	1.92964	nicotinamidase-related amidase
Ga0265800_10275	2778263427	B	0	0.71097	1.11799	0.520658	1.42183	0.790359	1.68463	crotonobetainyl-CoA:carnitine CoA-transferase CaiB-like acyl-CoA transferase
Ga0265800_10276	2778263428	B	0	1.63331	0.466972	0.932032	2.37554	1.51469	1.8094	hydroxymethylglutaryl-CoA lyase
Ga0265800_10277	2778263429	B	0	2.84828	1.91951	1.91558	3.0515	1.59647	4.26975	IclR family transcriptional regulator
Ga0265800_10278	2778263430	B	0	3.2178	1.36229	2.1752	2.47505	3.69041	5.4461	acyl-CoA hydrolase
Ga0265800_10279	2778263431	B	0	3.22791	1.05746	1.85733	5.11047	2.53295	4.55267	hypothetical protein
Ga0265800_10280	2778263432	B	0	3.16617	0	6.95596	11.0808	13.6648	18.4875	hypothetical protein
Ga0265800_10281	2778263433	B	21.8649	5.76502	4.53269	9.64995	5.76459	9.80164	9.10676	hypothetical protein
Ga0265800_10282	2778263434	B	3.77958	4.65055	3.65645	9.4873	10.7951	16.2915	13.3807	metallo-beta-lactamase superfamily protein
Ga0265800_10283	2778263435	B	7.89122	8.32258	3.95339	21.223	15.777	41.9057	23.5939	2-keto-4-pentenoate hydratase/2-oxohepta-3-ene-1,7-dioic acid hydratase in catechol pathway
Ga0265800_10284	2778263436	B	0	8.87934	3.75916	30.0117	23.2211	81.1999	33.7556	hypothetical protein
Ga0265800_10285	2778263437	B	4.27039	3.15268	1.88858	2.82707	3.90302	3.85813	9.45212	signal transduction histidine kinase
Ga0265800_10286	2778263438	B	0	4.06781	2.03527	3.01763	9.98388	6.23896	24.6599	hypothetical protein
Ga0265800_10287	2778263439	B	0	8.15497	0	0	13.5906	1.06654	12.8821	hypothetical protein
Ga0265800_10288	2778263440	B	0	0.888218	0.698352	1.00357	2.48682	2.64855	3.06673	GntR family transcriptional regulator
Ga0265800_10289	2778263441	B	0	2.07167	0.581725	0.928855	1.92355	1.50953	3.20575	tripartite-type tricarboxylate transporter receptor subunit TctC
Ga0265800_10290	2778263442	B	0	2.00075	1.31089	1.36053	1.83388	1.11208	3.38624	2-methylisocitrate lyase-like PEP mutase family enzyme
Ga0265800_10291	2778263443	B	1.14776	2.82451	0.634497	0.886477	2.42082	0.989464	4.23411	3-isopropylmalate dehydratase large subunit
Ga0265800_10292	2778263444	B	0	3.00454	0.787429	0.628653	2.25323	1.37531	5.08515	3-isopropylmalate dehydratase small subunit
Ga0265800_10293	2778263445	B	1.90436	2.3432	0.921159	0.735419	1.67359	1.64171	4.13581	methylisocitrate lyase
Ga0265800_10294	2778263446	B	9.55451	9.23706	14.195	22.4019	86.4859	15.9793	180.071	response regulator receiver domain-containing protein
Ga0265800_10295	2778263447	B	12.6688	19.2434	36.5721	50.6092	198.066	35.8587	480.427	Crp/Fnr family transcriptional regulator
Ga0265800_10296	2778263448	B	0	8.25641	14.6059	15.5478	39.215	13.3626	76.8564	hypothetical protein
Ga0265800_10297	2778263449	B	10.4241	9.16161	5.76258	12.0766	15.5736	8.62698	31.0119	uncharacterized protein DUF3297
Ga0265800_10298	2778263450	B	2.51521	5.30539	7.99501	8.74182	17.0202	8.23958	33.2235	tRNA pseudouridine synthase C
Ga0265800_10299	2778263451	B	0	2.38549	5.6267	7.86126	9.74002	8.26757	18.6394	phosphoglycolate phosphatase
Ga0265800_102100	2778263452	B	0	2.40603	2.94267	4.53082	4.27706	2.41247	7.23943	membrane protein DedA with SNARE-associated domain
Ga0265800_102101	2778263453	B	0	2.76969	4.08307	9.34467	9.69317	26.8956	11.3676	hypothetical protein
Ga0265800_102102	2778263454	B	2.61298	1.73879	1.05757	3.27433	3.54292	6.88652	4.86408	hypothetical protein
Ga0265800_102103	2778263455	B	7.65332	4.70848	1.58657	2.53331	4.03553	5.54214	12.9782	hypothetical protein
Ga0265800_102104	2778263456	B	0	1.81169	0.754106	1.47168	3.83623	2.50878	4.58137	trk system potassium uptake protein TrkH
Ga0265800_102105	2778263457	B	0	3.98094	2.20939	3.67478	5.85388	3.85888	3.88409	trk system potassium uptake protein TrkA
Ga0265800_102106	2778263458	B	0	2.90792	1.8887	2.4602	3.53981	2.92673	6.93307	signal transduction histidine kinase
Ga0265800_102107	2778263459	B	0	3.47537	0.420381	1.67808	2.13853	2.51736	5.33908	two-component system chemotaxis response regulator CheB
Ga0265800_102108	2778263460	B	0	0.899256	0.707031	1.35472	2.15805	1.4113	3.2266	CheR-type MCP methyltransferase
Ga0265800_102109	2778263461	B	1.31922	2.09119	0.850824	1.40705	2.08683	1.99009	4.89956	signal transduction histidine kinase
Ga0265800_102110	2778263462	B	0	0.669486	0.394782	0.945538	0.669436	0.722354	1.64299	threonine/homoserine efflux transporter RhtA
Ga0265800_102111	2778263463	B	7.89313	5.54973	9.81768	37.884	62.4297	105.878	60.8187	hypothetical protein
Ga0265800_102112	2778263464	B	4.8573	2.98831	6.54511	31.3522	42.0466	106.611	48.9872	TetR family transcriptional regulator
Ga0265800_102113	2778263465	B	12.4746	1.94911	3.7354	18.9637	26.3111	40.6267	25.36	3-mercaptopyruvate sulfurtransferase SseA
Ga0265800_102114	2778263466	B	0	5.60407	4.40614	12.8982	23.3485	18.323	21.4989	iron-binding CDGSH zinc finger protein
Ga0265800_102115	2778263467	B	1.98072	2.61123	3.55863	7.21197	15.4922	12.4309	18.3261	hypothetical protein
Ga0265800_102116	2778263468	B	11.9464	5.77473	4.95308	7.24964	8.1365	10.5047	13.0612	polyisoprenoid-binding protein YceI
Ga0265800_102117	2778263469	B	5.65535	6.83431	11.2353	18.9537	23.8561	22.3779	28.3917	radical SAM protein with 4Fe4S-binding SPASM domain
Ga0265800_102118	2778263470	B	21.3297	29.9942	43.2349	100.806	82.4779	163.285	123.74	BON domain-containing protein
Ga0265800_102119	2778263471	B	1.81484	3.66858	1.25408	2.95357	2.95059	3.81747	7.01891	ATP-binding cassette subfamily B protein/ATP-binding cassette subfamily C protein/ATP-binding cassette subfamily B multidrug efflux pump
Ga0265800_102120	2778263472	B	1.69934	12.2469	2.87696	3.46873	7.31774	4.27772	16.9614	ATP-binding cassette subfamily B protein/ATP-binding cassette subfamily C protein/ATP-binding cassette subfamily B multidrug efflux pump
Ga0265800_102121	2778263473	B	6.48847	11.9755	4.63309	2.86365	12.5448	4.62403	21.6197	phospho-acceptor domain-containing protein
Ga0265800_102122	2778263474	B	0	2.44969	0.888943	1.30111	2.4495	2.43982	3.44443	CRP-like cAMP-binding protein
Ga0265800_102123	2778263475	B	0	4.12821	0	2.59129	10.3197	1.61971	21.3102	hypothetical protein
Ga0265800_102124	2778263476	B	1.0283	1.71715	0.710574	0.794214	2.80145	1.9148	8.53522	histidine ammonia-lyase
Ga0265800_102125	2778263477	B	0	1.32679	0.401221	1.02502	1.5308	1.40153	3.14381	formimidoylglutamate deiminase
Ga0265800_102126	2778263478	B	0	0.942813	0.648618	0.591808	0.471371	1.20222	1.79516	imidazolonepropionase
Ga0265800_102127	2778263479	B	3.24135	2.27902	0.223982	0.894093	1.13942	2.0119	2.98934	hypothetical protein
Ga0265800_102128	2778263480	B	0	2.16646	0.340671	0.815937	0.433259	2.46504	2.49336	GntR family histidine utilization transcriptional repressor
Ga0265800_102129	2778263481	B	0	1.14169	0.512938	1.17734	1.38623	2.27172	3.80939	urocanate hydratase
Ga0265800_102130	2778263482	B	0	2.74157	0.489893	0.860448	2.74136	1.41792	4.72444	amino acid/amide ABC transporter substrate-binding protein (HAAT family)
Ga0265800_102131	2778263483	B	0	1.21371	0.408971	0.435343	1.56037	0.952402	2.81718	branched-chain amino acid transport system permease protein
Ga0265800_102132	2778263484	B	0	1.06586	0.279341	0.334523	1.24341	0.55759	1.44317	branched-chain amino acid transport system permease protein
Ga0265800_102133	2778263485	B	4.54451	1.59764	0.157016	0.752135	0.798761	0.548483	1.4872	amino acid/amide ABC transporter ATP-binding protein 1 (HAAT family)
Ga0265800_102134	2778263486	B	2.48985	1.09415	0.516158	0.274721	2.18813	0.429291	2.59257	amino acid/amide ABC transporter ATP-binding protein 2 (HAAT family)
Ga0265800_102135	2778263487	B	0	1.17158	0	1.47082	3.51449	0.919347	7.93158	hypothetical protein
Ga0265800_102136	2778263488	B	0	0	0.81144	0	4.12789	0.404927	2.79478	hypothetical protein
Ga0265800_102137	2778263489	B	0	2.87095	1.12863	0	2.87073	0	1.94362	hypothetical protein
Ga0265800_102138	2778263490	B	23.1345	14.7411	11.1904	83.2777	60.9932	284.598	113.906	hypothetical protein
Ga0265800_102139	2778263491	B	3.87736	4.08931	6.16243	53.2627	42.253	169.403	76.2477	hypothetical protein
Ga0265800_102140	2778263492	B	26.7221	7.71672	6.33098	36.0127	30.1936	79.3775	47.0177	thiol-disulfide isomerase/thioredoxin
Ga0265800_102141	2778263493	B	2.54375	2.57101	3.07609	13.1212	13.6365	21.4906	19.6381	sugar phosphate permease
Ga0265800_102142	2778263494	B	2.30624	1.41885	1.43428	4.07138	3.74952	5.32829	6.55234	aspartyl-tRNA(Asn)/glutamyl-tRNA(Gln) amidotransferase subunit A
Ga0265800_102143	2778263495	B	1.07297	0.754418	0	1.06549	1.41443	1.18399	2.80906	nitrite reductase (NO-forming)
Ga0265800_102144	2778263496	B	0	0.207335	0.326029	0.390435	0.414638	0.162696	0.631641	branched-chain amino acid transport system ATP-binding protein
Ga0265800_102145	2778263497	B	0	0.403119	0.316948	0.379559	0.806177	0.158164	0.409365	amino acid/amide ABC transporter ATP-binding protein 1 (HAAT family)
Ga0265800_102146	2778263498	B	0	0.776955	0	0.487698	0.466138	0.487744	0.683794	amino acid/amide ABC transporter membrane protein 2 (HAAT family)
Ga0265800_102147	2778263499	B	0	0	0.131089	0.104656	0.166716	0.392498	0.338624	amino acid/amide ABC transporter membrane protein 1 (HAAT family)
Ga0265800_102148	2778263500	B	2.68184	1.76778	0.648618	0.813736	1.53196	0.739829	2.79248	amino acid/amide ABC transporter substrate-binding protein (HAAT family)
Ga0265800_102149	2778263501	B	0	2.52781	0.993731	1.58671	4.73928	2.3555	4.38524	FKBP-type peptidyl-prolyl cis-trans isomerase FkpA
Ga0265800_102150	2778263502	B	0	2.29707	3.01007	2.16282	3.06252	2.85398	3.75817	uncharacterized protein DUF2721
Ga0265800_102151	2778263503	B	0	2.21715	0	1.51824	1.00772	1.58164	3.20669	hypothetical protein
Ga0265800_102152	2778263504	B	0	0	0	1.44643	2.30415	0	0.78001	hypothetical protein
Ga0265800_102153	2778263505	B	0	0.340776	0.803795	1.71125	1.363	1.06963	2.07634	hypothetical protein
Ga0265800_102154	2778263506	B	0	1.44235	0.850524	2.48976	0.72112	1.69773	1.83087	enamine deaminase RidA (YjgF/YER057c/UK114 family)
Ga0265800_102155	2778263507	B	0	0.507989	0.532535	0.850312	1.35454	0.930116	1.26099	diketogulonate reductase-like aldo/keto reductase
Ga0265800_102156	2778263508	B	0	1.10661	0.870062	0.463083	0.368843	0.361817	1.18619	D-aminopeptidase DppA
Ga0265800_102157	2778263509	B	0	0.262018	0.206009	0.411175	0.392998	0.668222	1.2417	L-aminopeptidase DmpA
Ga0265800_102158	2778263510	B	1.82016	0.639886	0	0.502074	0.959756	0.25106	1.1913	glutathione transport system permease protein
Ga0265800_102159	2778263511	B	0	0.481689	0.504964	1.00786	1.44496	1.13395	1.63051	glutathione transport system permease protein
Ga0265800_102160	2778263512	B	0	0.639288	0.502633	1.37583	0.639239	1.28996	1.85484	glutathione transport system substrate-binding protein
Ga0265800_102161	2778263513	B	1.66218	0.876519	0.402006	1.55888	0.730377	1.54757	1.92855	glutathione transport system ATP-binding protein
Ga0265800_102162	2778263514	B	0	1.90561	0.624279	1.9936	1.90547	2.36762	3.06397	beta-aspartyl-peptidase (threonine type)
Ga0265800_102163	2778263515	B	0	2.18329	1.47136	2.44725	2.33906	4.09953	3.85356	RpiR family transcriptional regulator
Ga0265800_102164	2778263516	B	6.57959	2.19743	3.09168	10.6717	12.2584	27.3624	20.7097	D-alanyl-D-alanine endopeptidase (penicillin-binding protein 7)
Ga0265800_102165	2778263517	B	2.31485	1.83104	1.43963	7.27921	6.91673	14.7673	15.4262	hypothetical protein
Ga0265800_102166	2778263518	B	1.46412	1.93019	1.92229	3.15013	5.91881	6.05852	10.4539	2,4-dienoyl-CoA reductase-like NADH-dependent reductase (Old Yellow Enzyme family)
Ga0265800_102167	2778263519	B	1.19208	1.46678	0.823743	1.57835	4.4	2.91857	5.46152	aspartyl-tRNA(Asn)/glutamyl-tRNA(Gln) amidotransferase subunit A
Ga0265800_102168	2778263520	B	2.58091	1.13416	0.356689	0.569535	1.58771	1.06798	2.68738	uncharacterized protein DUF2848
Ga0265800_102169	2778263521	B	0	0.554632	0.872148	0.557032	0.887344	0.870444	2.4031	tripartite ATP-independent transporter DctM subunit
Ga0265800_102170	2778263522	B	0	1.27393	0	0.15993	2.2929	1.09962	3.19105	TRAP-type mannitol/chloroaromatic compound transport system permease small subunit
Ga0265800_102171	2778263523	B	1.57123	2.20949	1.08574	1.64695	3.45206	1.30034	4.06674	TRAP-type C4-dicarboxylate transport system substrate-binding protein
Ga0265800_102172	2778263524	B	0	2.66627	0.87347	4.60248	6.22083	3.05117	7.37064	GntR family transcriptional regulator
Ga0265800_102173	2778263525	B	6.69361	5.49073	0.925077	5.16983	5.88248	2.84675	18.3205	CRP/FNR family transcriptional regulator
Ga0265800_102174	2778263526	B	0	0.55949	0.989759	1.14138	15.5247	0.823188	42.4225	thiamine biosynthesis lipoprotein
Ga0265800_102175	2778263527	B	0	0	2.12449	1.13074	25.2176	1.94364	61.739	cytochrome c5
Ga0265800_102176	2778263528	B	0	0.427472	0.448127	1.11802	14.3192	0.810644	30.0731	nitrous oxide reductase apoprotein
Ga0265800_102177	2778263529	B	0	0.317654	0.249752	0.398786	2.73162	0.249264	4.86014	NosR/NirI family nitrous oxide reductase transcriptional regulator
Ga0265800_102178	2778263530	B	0	0.396841	0	0.249099	1.19043	0.311403	3.22392	hypothetical protein
Ga0265800_102179	2778263531	B	0	0.222421	0.349753	0.837688	1.11202	0.261802	1.50578	nitrous oxidase accessory protein
Ga0265800_102180	2778263532	B	1.80685	0.794006	0.124856	0.897122	0.635157	0.685365	1.23634	Cu-processing system ATP-binding protein
Ga0265800_102181	2778263533	B	0	0.553306	0.14501	0.810395	1.10653	0.868362	0.874033	Cu-processing system permease protein
Ga0265800_102182	2778263534	B	3.54361	0.622885	0.979474	1.75944	3.11419	2.68829	4.00606	copper chaperone NosL
Ga0265800_102183	2778263535	B	0	3.56313	1.93948	3.785	6.30352	5.80708	7.05112	AAA domain-containing protein
Ga0265800_102184	2778263536	B	0	2.5802	0.676218	4.21096	6.02001	12.1481	9.1415	hypothetical protein
Ga0265800_102185	2778263537	B	2.10746	0.370444	0.436887	1.04638	0.740832	0.65405	1.44204	uncharacterized protein DUF4198
Ga0265800_102186	2778263538	B	0	2.11416	1.10816	0.442355	0.704666	0.552995	2.14691	hypothetical protein
Ga0265800_102187	2778263539	B	1.97441	1.47499	0.545739	0.708009	1.12785	1.25956	1.96776	uncharacterized protein DUF4331
Ga0265800_102188	2778263540	B	0	2.37487	0.746888	0.298144	2.84963	0.931785	3.21556	hypothetical protein
Ga0265800_102189	2778263541	B	0	0.190088	0.597818	1.43183	0.190073	1.41704	1.99467	anti-sigma-K factor RskA
Ga0265800_102190	2778263542	B	0	1.32042	0.830534	1.82343	1.58439	3.52287	2.94994	RNA polymerase sigma-70 factor (ECF subfamily)
Ga0265800_102191	2778263543	B	0.767795	1.88945	0.848893	2.07553	1.28203	2.22399	2.69536	peptidyl-dipeptidase Dcp
Ga0265800_102192	2778263544	B	0	2.0121	0.703107	2.03484	2.12372	1.84205	4.01087	Asp-tRNA(Asn)/Glu-tRNA(Gln) amidotransferase A subunit family amidase
Ga0265800_102193	2778263545	B	1.69524	0.446977	0.585718	1.2158	1.19185	1.34452	2.42081	tripartite-type tricarboxylate transporter receptor subunit TctC
Ga0265800_102194	2778263546	B	0	1.69715	0.606532	1.16216	3.23978	2.23978	3.6558	LysR family transcriptional regulator
Ga0265800_102195	2778263547	B	0	3.24529	1.70105	1.35805	4.32672	2.97102	7.32349	disulfide bond formation protein DsbB
Ga0265800_102196	2778263548	B	5.44636	3.11137	1.12905	1.20186	6.4616	2.3476	13.5295	protein-disulfide isomerase
Ga0265800_102197	2778263549	B	0	3.16075	1.24255	0.661338	10.535	4.75381	21.3981	hypothetical protein
Ga0265800_102198	2778263550	B	0	3.1244	0.982611	3.9224	8.12283	4.65828	12.2682	quaternary ammonium compound-resistance protein SugE
Ga0265800_102199	2778263551	B	0	3.61254	2.06569	1.75224	7.06035	1.86837	13.9515	hypothetical protein
Ga0265800_102200	2778263552	B	0	2.32509	1.16332	1.06143	11.2019	1.82451	17.1002	hypothetical protein
Ga0265800_102201	2778263553	B	0.71865	3.34754	1.58911	1.94268	12.505	1.75948	20.653	papain like protease
Ga0265800_102202	2778263554	B	0	1.47843	1.06553	0.696012	5.66688	0.918435	12.6779	chitosanase
Ga0265800_102203	2778263555	B	1.70108	1.04654	0.352641	0.18769	2.84038	0.41061	4.70647	hypothetical protein
Ga0265800_102204	2778263556	B	0	1.24976	0.982611	0	1.8745	0.735518	5.0765	hypothetical protein
Ga0265800_102205	2778263557	B	0	1.68518	0.722702	0.384652	3.3701	0.48086	4.719	hypothetical protein
Ga0265800_102206	2778263558	B	2.80036	7.3836	2.1286	6.17963	9.84406	6.08364	19.8281	outer membrane lipoprotein SlyB
Ga0265800_102207	2778263559	B	2.22117	5.85647	1.84184	4.28882	8.19844	3.59988	12.2909	hypothetical protein
Ga0265800_102208	2778263560	B	10.0363	7.05661	0	1.10737	2.64603	3.11476	7.7631	hypothetical protein
Ga0265800_102209	2778263561	B	11.4335	8.54146	0.395037	3.46921	4.01921	4.33692	8.33365	glutaredoxin-related protein
Ga0265800_102210	2778263562	B	0	1.77259	0.650383	0.741773	1.65429	0.741843	1.68005	hypothetical protein
Ga0265800_102211	2778263563	B	0	0	0	0	0	0	0.521548	hypothetical protein
Ga0265800_102212	2778263564	B	0	2.52411	1.13403	1.81074	2.88448	2.40511	3.90586	helix-turn-helix protein
Ga0265800_102213	2778263565	B	2.47737	3.70145	1.7119	1.36671	2.17716	1.45227	2.80067	nucleotidyltransferase AbiEii toxin of type IV toxin-antitoxin system
Ga0265800_102214	2778263566	B	0	3.65544	0.884322	1.05901	1.687	0.77227	1.5229	putative cold-shock DNA-binding protein
Ga0265800_102215	2778263567	B	0.849671	1.41885	0.469709	0.609371	1.19473	0.937582	1.18806	UvrD-like helicase family protein
Ga0265800_102216	2778263568	B	0.838525	0.933493	0.444232	0.848096	0.98255	1.06986	2.31168	ATPase family protein associated with various cellular activities (AAA)
Ga0265800_102217	2778263569	B	0	1.07823	0.565162	0.827208	1.43752	1.59816	2.0682	DNA-binding transcriptional MocR family regulator
Ga0265800_102218	2778263570	B	0	2.4771	1.00331	1.69624	2.02657	1.47257	3.04907	diguanylate cyclase (GGDEF)-like protein
Ga0265800_102219	2778263571	B	0	0.717766	0.438928	0.851028	0.877203	1.03259	2.07868	diguanylate cyclase (GGDEF)-like protein
Ga0265800_102220	2778263572	B	0	0.210348	0	1.4524	1.68266	0.990365	2.77689	carboxymethylenebutenolidase
Ga0265800_102221	2778263573	B	0	0.919188	0.843152	0.769304	1.68505	1.50269	1.815	membrane protein
Ga0265800_102222	2778263574	B	0	1.22366	0	0.460859	0.244714	0.576128	1.32546	hypothetical protein
Ga0265800_102223	2778263575	B	0	0.389502	0.510403	0.488984	0.778945	2.03762	1.58215	drug/metabolite transporter (DMT)-like permease
Ga0265800_102224	2778263576	B	0	1.75184	1.7217	2.84072	4.96316	4.12402	4.69453	tripartite-type tricarboxylate transporter receptor subunit TctC
Ga0265800_102225	2778263577	B	8.27995	5.09399	11.4431	40.1974	40.7488	96.5056	51.4828	uncharacterized protein DUF3606
Ga0265800_102226	2778263578	B	1.39389	2.45014	4.23808	19.2246	21.1921	50.5172	38.8559	thiamine-phosphate pyrophosphorylase/hydroxymethylpyrimidine kinase/phosphomethylpyrimidine kinase/thiamine-phosphate diphosphorylase
Ga0265800_102227	2778263579	B	2.08083	1.09729	1.72546	5.28059	6.94897	7.4624	13.4953	thiazole-phosphate synthase
Ga0265800_102228	2778263580	B	0	0	1.7646	4.22637	2.24418	1.76115	4.55825	sulfur carrier protein
Ga0265800_102229	2778263581	B	0	0.593655	0.93351	1.24213	1.9787	1.08697	2.34443	3-oxoacyl-[acyl-carrier protein] reductase
Ga0265800_102230	2778263582	B	0	1.61672	0.346672	0.55354	1.6166	0.691989	2.13928	NitT/TauT family transport system substrate-binding protein
Ga0265800_102231	2778263583	B	0	2.99558	0.471049	0.752135	1.9969	1.33203	1.6224	NitT/TauT family transport system permease protein
Ga0265800_102232	2778263584	B	0	4.25249	0.796066	1.2711	1.41739	1.50957	2.46765	NitT/TauT family transport system ATP-binding protein
Ga0265800_102233	2778263585	B	4.33902	3.8135	0.82454	1.61578	2.95524	2.39397	4.58256	acyl-CoA reductase LuxC
Ga0265800_102234	2778263586	B	4.54039	6.25175	1.46415	4.59221	6.11828	4.22732	8.73498	acyl-protein synthetase LuxE
Ga0265800_102235	2778263587	B	2.02124	9.23747	3.7711	6.80197	11.0131	8.01536	17.6788	hydroxymethylpyrimidine/phosphomethylpyrimidine kinase
Ga0265800_102236	2778263588	B	0	0.228024	0	0.286263	0.68402	0.268397	2.54712	GntR family transcriptional regulator
Ga0265800_102237	2778263589	B	0	0.118819	0.186841	0.298333	1.78215	0.0932379	5.26883	acetyl-CoA acetyltransferase
Ga0265800_102238	2778263590	B	0	0.357046	0.210543	0.168089	1.42808	0.350219	3.2632	fatty-acyl-CoA synthase
Ga0265800_102239	2778263591	B	0.735776	0.258665	0.101686	0.202957	0.969921	0.202975	0.963134	N-methylhydantoinase A
Ga0265800_102240	2778263592	B	0	0.164645	0.0647251	0.25837	0.0823161	0.161497	0.334391	N-methylhydantoinase B
Ga0265800_102241	2778263593	B	0	0.382636	0.100281	0.160122	1.02029	0.0500427	0.518087	butyryl-CoA dehydrogenase/hypothetical protein
Ga0265800_102242	2778263594	B	0	0	0	0.565371	0	0.35339	0.152442	methylmalonyl-CoA mutase C-terminal domain/subunit
Ga0265800_102243	2778263595	B	0	0.259773	0.204244	0.108707	0.173169	0.203845	0.527597	methylmalonyl-CoA mutase
Ga0265800_102244	2778263596	B	0	0.628311	0	0	0.157066	0.308148	0.850727	carbon-monoxide dehydrogenase medium subunit
Ga0265800_102245	2778263597	B	0	0	0.267932	0.213907	0.34075	1.06963	0.57676	purine hydroxylase delta subunit apoprotein
Ga0265800_102246	2778263598	B	0	1.18238	0.976116	0.222655	1.06406	0.76545	1.28075	xanthine dehydrogenase molybdenum-binding subunit
Ga0265800_102247	2778263599	B	0	0	0	0.564215	0	0	0.608521	molybdopterin synthase sulfur carrier subunit
Ga0265800_102248	2778263600	B	0	0.241606	0	0.303314	0.241587	0.142192	0.408915	crotonobetainyl-CoA:carnitine CoA-transferase CaiB-like acyl-CoA transferase
Ga0265800_102249	2778263601	B	0	0.48058	0.215915	0.258567	0.617841	0.242429	1.16197	enoyl-CoA hydratase/3-hydroxyacyl-CoA dehydrogenase
Ga0265800_102250	2778263602	B	0	0.995136	0.335321	0.178472	0.568606	0.613554	0.86619	TRAP-type C4-dicarboxylate transport system substrate-binding protein
Ga0265800_102251	2778263603	B	3.44477	0.908267	0.238039	1.14025	0.908198	0.71272	1.1273	TRAP-type C4-dicarboxylate transport system permease small subunit
Ga0265800_102252	2778263604	B	1.25253	0.990744	0.432757	0.345497	0.660446	0.518294	0.968832	tripartite ATP-independent transporter DctM subunit
Ga0265800_102253	2778263605	B	0.89623	1.85106	0.650274	1.23608	0.945149	0.988957	2.34634	indolepyruvate ferredoxin oxidoreductase
Ga0265800_102254	2778263606	B	2.94397	4.31236	2.03433	4.11446	2.93218	4.80517	6.30601	gamma-glutamyltranspeptidase/glutathione hydrolase
Ga0265800_102255	2778263607	B	1.73696	7.78562	2.28051	6.51609	4.88473	6.82816	11.2134	tripartite-type tricarboxylate transporter receptor subunit TctC
Ga0265800_102256	2778263608	B	0	0.239337	1.12905	0.60093	1.43591	0.375616	2.1874	DNA-(apurinic or apyrimidinic site) lyase /endonuclease III
Ga0265800_102257	2778263609	B	0	2.70784	0.532253	1.27479	2.03073	2.12485	3.74278	glutathione S-transferase
Ga0265800_102258	2778263610	B	0	2.80361	0.440861	1.0559	0.560679	1.32	1.89803	hypothetical protein
Ga0265800_102259	2778263611	B	0	5.47456	0.935721	1.6435	3.09408	2.24134	9.74906	LuxR family two component transcriptional regulator
Ga0265800_102260	2778263612	B	0	3.76621	1.59902	1.79669	2.25956	1.68455	5.81334	hypothetical protein
Ga0265800_102261	2778263613	B	10.6916	3.75869	1.10821	2.35935	2.81881	4.05551	8.11098	hypothetical protein
Ga0265800_102262	2778263614	B	3.4513	2.52775	2.94138	2.41175	3.13418	4.16543	7.87188	NodT family efflux transporter outer membrane factor (OMF) lipoprotein
Ga0265800_102263	2778263615	B	3.80954	1.79963	2.53373	2.62706	3.89193	3.5797	7.39505	multidrug efflux pump
Ga0265800_102264	2778263616	B	6.5592	3.70594	6.60451	11.1401	17.3342	15.8974	28.8663	multidrug efflux pump
Ga0265800_102265	2778263617	B	11.7771	7.90422	13.8349	34.0808	46.0104	58.4435	77.7505	multidrug efflux system membrane fusion protein
Ga0265800_102266	2778263618	B	1.86274	3.27427	1.02974	1.49007	1.88256	0.963499	4.18396	type I phosphodiesterase/nucleotide pyrophosphatase
Ga0265800_102267	2778263619	B	2.66443	8.89858	3.31409	3.08682	6.55635	3.76701	11.573	demethylmenaquinone methyltransferase/2-methoxy-6-polyprenyl-1,4-benzoquinol methylase
Ga0265800_102268	2778263620	B	9.03055	7.14314	3.12012	4.73288	3.5713	4.51534	9.67175	nucleotide-binding universal stress UspA family protein
Ga0265800_102269	2778263621	B	0	1.30455	0.820552	0.818873	0.521781	1.12605	1.32476	CobB/CobQ-like glutamine amidotransferase-like protein
Ga0265800_102270	2778263622	B	2.05487	2.70899	1.41994	1.13363	1.2641	1.41717	2.01737	iron complex transport system ATP-binding protein
Ga0265800_102271	2778263623	B	3.34457	1.02882	1.84892	1.38385	1.17571	1.78764	2.48753	iron complex transport system permease protein
Ga0265800_102272	2778263624	B	11.5149	3.54211	2.3871	3.17628	3.7105	2.38243	4.79599	iron complex transport system substrate-binding protein
Ga0265800_102273	2778263625	B	8.39405	7.19297	3.77027	5.20968	6.0859	4.84835	5.86851	iron complex transport system substrate-binding protein
Ga0265800_102274	2778263626	B	7.24811	12.0327	3.72859	5.5981	6.01591	6.16515	11.141	iron complex outermembrane receptor protein
Ga0265800_102276	2778263627	B	13.6247	21.5541	4.70742	18.7911	13.171	15.5041	19.0507	uncharacterized protein (TIGR02449 family)
Ga0265800_102277	2778263628	B	12.2852	10.2574	2.54678	10.844	10.7965	9.31995	19.5535	cell division protein ZapA
Ga0265800_102279	2778263630	B	10.4926	21.5789	7.97557	17.3656	16.5979	17.0778	29.4674	uncharacterized membrane protein YfcA
Ga0265800_102280	2778263631	B	8.40109	14.5211	5.03124	8.65148	11.8129	11.4913	13.8297	glyoxylase-like metal-dependent hydrolase (beta-lactamase superfamily II)
Ga0265800_102281	2778263632	B	1.68485	2.70651	0.59664	1.45583	2.97333	2.63376	4.55586	glycosyl hydrolase family 8
Ga0265800_102282	2778263633	B	0	6.08955	3.04681	1.04248	1.66066	2.38924	3.93521	heme-degrading monooxygenase HmoA
Ga0265800_102283	2778263634	B	4.06898	4.64903	0.843519	2.24478	4.29108	2.10468	5.81053	organic hydroperoxide reductase OsmC/OhrA
Ga0265800_102284	2778263635	B	0	1.88438	0.740786	1.06455	1.50739	1.84835	3.25307	pimeloyl-ACP methyl ester carboxylesterase
Ga0265800_102285	2778263636	B	0	3.06699	1.33966	1.28344	1.70375	1.33704	3.34521	hypothetical protein
Ga0265800_102286	2778263637	B	0	1.96097	0.616718	0.615456	0.588248	1.07715	2.25687	enoyl-CoA hydratase/carnithine racemase
Ga0265800_102287	2778263638	B	0	2.10223	0.956917	0.833419	1.8808	1.04187	2.73405	tripartite ATP-independent transporter DctM subunit
Ga0265800_102288	2778263639	B	0	1.72055	1.12731	1.62	3.72758	2.81276	2.32961	TRAP-type C4-dicarboxylate transport system permease small subunit
Ga0265800_102289	2778263640	B	1.62284	3.4231	0.897127	1.43246	1.99666	1.5669	2.17259	tripartite ATP-independent transporter DctP family solute receptor
Ga0265800_102290	2778263641	B	0	1.03812	0.362761	0.651634	1.15338	1.0409	1.1323	alanine-glyoxylate transaminase/serine-glyoxylate transaminase/serine-pyruvate transaminase
Ga0265800_102291	2778263642	B	0	1.11095	0.349388	0.278938	0.666517	1.04612	1.50421	GntR family transcriptional regulator
Ga0265800_102292	2778263643	B	0.481765	0.973858	0.299616	0.691029	1.05846	1.02999	1.66258	FAD/FMN-containing dehydrogenase
Ga0265800_102293	2778263644	B	0	3.63093	0.815651	1.62796	1.29666	2.44217	2.98486	hypothetical protein
Ga0265800_102294	2778263645	B	0	0.760145	0.398438	0.278335	0.886769	0.596489	0.814807	nuclease-like protein
Ga0265800_102295	2778263646	B	0	0.628002	0.164587	0.394199	0.627954	0.246398	0.637732	uncharacterized protein (TIGR00288 family)
Ga0265800_102296	2778263647	B	0	1.21332	0.556477	0.380803	0.909922	0.991768	1.6086	aspartate ammonia-lyase
Ga0265800_102297	2778263648	B	1.21854	1.49934	0.505218	0.470571	1.92758	1.42865	1.99384	anaerobic C4-dicarboxylate transporter DcuA
Ga0265800_102298	2778263649	B	0	4.14669	1.46713	1.95217	3.52442	3.17258	8.98334	amino acid/amide ABC transporter ATP-binding protein 2 (HAAT family)
Ga0265800_102299	2778263650	B	2.44065	6.22065	1.51787	2.55827	3.00284	3.19813	7.624	amino acid/amide ABC transporter ATP-binding protein 1 (HAAT family)
Ga0265800_102300	2778263651	B	1.91916	5.06016	1.06093	1.58814	3.03587	1.72065	5.48113	amino acid/amide ABC transporter membrane protein 1 (HAAT family)
Ga0265800_102301	2778263652	B	0	5.29109	1.6178	2.67544	4.8498	4.15194	8.15911	amino acid/amide ABC transporter membrane protein 2 (HAAT family)
Ga0265800_102302	2778263653	B	0	3.9412	2.10713	1.88017	5.20199	4.5153	6.35026	DNA-binding transcriptional LysR family regulator
Ga0265800_102303	2778263654	B	1.30894	2.41587	0.81405	1.37203	3.22091	1.98601	3.58259	amino acid/amide ABC transporter substrate-binding protein (HAAT family)
Ga0265800_102304	2778263655	B	1.13719	3.19828	0.628654	1.31747	3.19804	2.2352	5.44689	aspartyl-tRNA(Asn)/glutamyl-tRNA(Gln) amidotransferase subunit A
Ga0265800_102306	2778263656	B	1.14776	2.32013	0.555184	1.2664	1.71475	1.46441	3.24387	Na+/proline symporter
Ga0265800_102307	2778263657	B	0	1.76479	0	1.38471	1.76466	1.21173	1.04541	hypothetical protein
Ga0265800_102308	2778263658	B	0	1.28906	0.810807	0.809148	1.28896	1.11268	2.00718	phospholipase/carboxylesterase
Ga0265800_102309	2778263659	B	3.00476	1.32042	0.830534	0.994601	0.528129	1.24337	1.69845	NAD(P)H dehydrogenase (quinone)
Ga0265800_102310	2778263660	B	0	0.882076	0.693523	0	0.882009	0.346084	1.19432	hypothetical protein
Ga0265800_102311	2778263661	B	0	1.36529	0.402541	1.07125	1.53583	0.870469	2.25297	4,5-DOPA dioxygenase extradiol
Ga0265800_102312	2778263662	B	0	1.03205	0	1.29565	1.03197	1.61971	2.44543	hypothetical protein
Ga0265800_102313	2778263663	B	2.013	0.707679	0.139101	0.777373	1.06144	1.11064	1.43729	NAD(P)H dehydrogenase (quinone)
Ga0265800_102314	2778263664	B	4.59935	2.02115	0.953466	0.507474	1.2126	1.58601	1.77881	HxlR family transcriptional regulator
Ga0265800_102315	2778263665	B	0	0.693716	0.545427	1.30634	0.693663	1.90526	3.05268	uncharacterized protein with PQ loop repeat
Ga0265800_102316	2778263666	B	12.2396	4.30289	1.69155	2.02571	1.07564	2.11031	2.91304	hypothetical protein
Ga0265800_102317	2778263667	B	0	0.834224	0.218633	0.581829	1.39027	0.836457	1.16091	aldehyde dehydrogenase (NAD+)
Ga0265800_102318	2778263668	B	1.55149	0.68179	0.10721	0.171185	0.681739	0.749005	0.553883	putative spermidine/putrescine transport system substrate-binding protein
Ga0265800_102319	2778263669	B	0	0.122162	0.288147	0.306727	0	0.191723	0.496221	glycine/D-amino acid oxidase-like deaminating enzyme
Ga0265800_102320	2778263670	B	0	0.511507	0.0804333	0.25686	0.613761	0.682348	0.900348	NADPH-dependent 2,4-dienoyl-CoA reductase/sulfur reductase-like enzyme
Ga0265800_102321	2778263671	B	0	1.45543	1.14431	1.37037	1.45532	1.14208	1.23165	2Fe-2S iron-sulfur cluster protein
Ga0265800_102322	2778263672	B	2.16282	0.190088	0	0.238638	0.190073	0.522068	0.579098	putative spermidine/putrescine transport system permease protein
Ga0265800_102323	2778263673	B	0	0.334743	0.263188	0.21012	0.334718	0.45968	0.566549	putative spermidine/putrescine transport system permease protein
Ga0265800_102324	2778263674	B	0	0.653076	0.308084	0.163975	0.914236	0.922447	1.06111	putative spermidine/putrescine transport system ATP-binding protein
Ga0265800_102325	2778263675	B	1.98869	1.74783	1.78648	1.86511	1.22339	4.04601	3.96397	IclR family transcriptional regulator
Ga0265800_102326	2778263676	B	0	4.02929	1.18799	3.47765	4.78441	5.23672	8.78014	peroxiredoxin
Ga0265800_102327	2778263677	B	3.86538	1.81186	1.06841	1.84813	3.28374	3.68771	4.75315	NAD(P)H-dependent flavin oxidoreductase YrpB (nitropropane dioxygenase family)
Ga0265800_102328	2778263678	B	0	2.17955	0.942506	1.91536	2.50629	4.78884	4.38975	gamma-glutamylputrescine oxidase
Ga0265800_102329	2778263679	B	1.13198	2.88516	1.56443	4.62124	7.46106	10.1099	9.059	homospermidine synthase
Ga0265800_102330	2778263680	B	0	2.39813	1.1477	2.61795	13.0324	2.04546	23.8588	metallo-beta-lactamase family protein
Ga0265800_102331	2778263681	B	2.60816	1.60459	2.70342	5.75549	20.8581	3.59751	59.0483	hypothetical protein
Ga0265800_102332	2778263682	B	3.4513	2.93219	1.98742	5.07738	29.4208	4.32411	62.1536	oxygen-independent coproporphyrinogen-3 oxidase
Ga0265800_102333	2778263683	B	4.40275	2.90214	5.62838	4.97927	22.635	3.79553	50.6902	CRP/FNR family transcriptional regulator
Ga0265800_102334	2778263684	B	1.16044	1.07089	1.4033	1.15235	3.77334	1.16046	8.25108	acetyltransferase
Ga0265800_102335	2778263685	B	0	0	0.666678	0.53225	6.78294	0.831719	8.46718	TraR/DksA family transcriptional regulator
Ga0265800_102336	2778263686	B	0	0.555203	0.685964	0.448075	1.42756	0.311192	2.28207	polyhydroxyalkanoate synthase
Ga0265800_102337	2778263687	B	0	1.01848	0	0.365317	1.45486	0.456688	1.82227	propanol-preferring alcohol dehydrogenase
Ga0265800_102338	2778263688	B	2.72318	1.43602	0.564527	0.450698	1.67523	0.0939041	2.02537	osmotically-inducible protein OsmY
Ga0265800_102339	2778263689	B	0	0.408029	0	0.512243	1.63199	0.960546	2.90046	heat shock protein Hsp20
Ga0265800_102340	2778263690	B	2.39335	1.26209	0.496152	0.528146	1.26199	0.577713	1.99367	putative ABC transport system ATP-binding protein
Ga0265800_102341	2778263691	B	0	0.403933	0.226849	0.217329	0.403902	0.316967	1.13291	putative ABC transport system permease protein
Ga0265800_102342	2778263692	B	0	0.360403	0.188909	0.527862	7.32764	0.424214	24.1551	HlyD family secretion protein
Ga0265800_102343	2778263693	B	0	1.545	0.60737	1.69716	18.1524	1.21237	50.9905	nucleotide-binding universal stress UspA family protein
Ga0265800_102344	2778263694	B	0	0	0	1.47082	11.715	0.919347	28.9503	hypothetical protein
Ga0265800_102345	2778263695	B	1.10415	0.582254	0.610388	1.21828	3.39622	0.837643	11.5627	hypothetical protein
Ga0265800_102346	2778263696	B	2.31485	0.813794	0.639837	0.893938	3.86523	0.95788	3.85655	3-oxoacyl-[acyl-carrier-protein] reductase
Ga0265800_102347	2778263697	B	0	0.853989	0.537152	0.536052	1.19549	0.636622	2.25477	thermosome subunit
Ga0265800_102348	2778263698	B	0	1.06861	0.480107	0.574949	1.37383	0.838546	1.75694	hypothetical protein
Ga0265800_102349	2778263699	B	0	2.67269	0.466972	1.39805	1.0393	1.74772	3.46801	ribose-phosphate pyrophosphokinase
Ga0265800_102350	2778263700	B	3.01768	1.3261	0.625578	0.749157	0.928198	0.780445	3.27683	aminoglycoside phosphotransferase family enzyme
Ga0265800_102351	2778263701	B	0	1.03867	0.102081	0.162995	0.908769	0.815049	2.37322	poly-gamma-glutamate synthesis protein (capsule biosynthesis protein)
Ga0265800_102352	2778263702	B	0	2.16597	0.378438	0.604261	2.40645	0.755397	4.56198	predicted phosphoribosyltransferase
Ga0265800_102353	2778263703	B	0	1.0665	0.838523	0.669445	2.13284	0.209221	1.26353	ribosomal subunit interface protein
Ga0265800_102354	2778263704	B	0	0.733356	0	0.230165	1.09995	0.143867	3.22711	CBS domain protein
Ga0265800_102355	2778263705	B	0	0.655846	0.128913	0.171532	0.874396	0.235879	2.01652	lon-related putative ATP-dependent protease
Ga0265800_102356	2778263706	B	0	0.809579	0.363728	0	0.462582	0.272263	0.782974	pyruvate dehydrogenase E1 component alpha subunit
Ga0265800_102357	2778263707	B	0	0.755329	0.118774	0.379298	0.453163	0.237084	0.818167	pyruvate dehydrogenase E1 component beta subunit
Ga0265800_102358	2778263708	B	0	0	0	0	0.7648	0.600187	0.776709	YgiT-type zinc finger domain-containing protein
Ga0265800_102359	2778263709	B	0	0.302756	0.476077	0	0	0.118787	0.512411	hypothetical protein
Ga0265800_102360	2778263710	B	3.02315	0.797101	0	0.166781	0.26568	0.312744	0.719512	hypothetical protein
Ga0265800_102361	2778263711	B	0	0.479849	0.301821	0.240962	0.38385	0.301231	0.844625	D-alanyl-lipoteichoic acid acyltransferase DltB (MBOAT superfamily)
Ga0265800_102362	2778263712	B	0	0.73737	0.579749	0.46285	1.47463	0.289308	1.34783	hypothetical protein
Ga0265800_102363	2778263713	B	0	1.17974	1.23675	0.493685	1.17965	0.617164	2.12981	protein required for attachment to host cells
Ga0265800_102364	2778263714	B	0	0.71801	0.376352	1.05163	1.19659	0.563425	2.75451	osmotically-inducible protein OsmY
Ga0265800_102365	2778263715	B	1.04572	2.02195	0.939389	1.15381	1.2866	1.11785	5.03986	thymidine phosphorylase
Ga0265800_102366	2778263716	B	5.50102	5.64056	2.02735	2.73132	3.06179	3.28801	7.63728	ribose-phosphate pyrophosphokinase
Ga0265800_102367	2778263717	B	4.41855	8.15515	5.69947	5.6878	10.355	4.72335	18.6662	L-alanine dehydrogenase
Ga0265800_102368	2778263718	B	0	8.59706	9.89761	13.8765	18.7279	6.50521	56.8506	hypothetical protein
Ga0265800_102369	2778263719	B	4.31794	8.34896	13.1286	17.8659	45.5363	10.5717	102.896	hypothetical protein
Ga0265800_102370	2778263720	B	11.3029	8.94053	20.6977	25.8776	69.5322	15.7852	217.729	chaperone modulatory protein CbpM
Ga0265800_102371	2778263721	B	7.36202	16.0142	26.9625	24.8766	108.047	25.4501	297.759	curved DNA-binding protein
Ga0265800_102372	2778263722	B	13.2674	19.8229	18.1831	20.6162	89.2303	12.5813	205.291	CRP/FNR family transcriptional regulator
Ga0265800_102373	2778263723	B	9.28515	11.0168	8.98264	14.0867	49.7758	8.00455	88.8093	response regulator receiver protein
Ga0265800_102374	2778263724	B	0	3.31618	2.30647	2.88219	7.01447	3.80324	10.5344	hypothetical protein
Ga0265800_102375	2778263725	B	6.37991	3.36433	2.20431	5.2795	6.72814	2.64	8.92074	ArsR family transcriptional regulator
Ga0265800_102376	2778263726	B	0	2.37971	0.93551	1.49375	2.11514	1.0893	5.37017	sulfur transporter
Ga0265800_102377	2778263727	B	0	1.35488	0.355086	0.850462	0.451592	1.5357	1.73258	glyoxylase-like metal-dependent hydrolase (beta-lactamase superfamily II)
Ga0265800_102378	2778263728	B	0	1.38484	0	0.217318	2.07711	1.08669	1.17192	hypothetical protein
Ga0265800_102379	2778263729	B	1.20369	0.634746	0.249531	0.398433	0.211566	0.124522	0.501341	sulfane dehydrogenase subunit SoxC
Ga0265800_102380	2778263730	B	0	0.388341	0	0.0812543	0.647185	0	0.657262	sulfur dehydrogenase subunit SoxD
Ga0265800_102381	2778263731	B	0	1.50484	0.887373	2.12534	2.25709	0.885639	2.16489	thiosulfate-binding protein SoxY
Ga0265800_102382	2778263732	B	0	1.92957	0.505701	0.807465	1.28628	1.00943	2.83034	sulfur compound chelating protein SoxZ
Ga0265800_102383	2778263733	B	0	1.1506	0.904648	1.44447	2.10927	0.67716	2.46668	diheme cytochrome SoxA (sulfur oxidation)
Ga0265800_102384	2778263734	B	0	1.13416	0.535034	0.711918	1.13408	0.711985	2.45703	monoheme cytochrome SoxX (sulfur oxidation)
Ga0265800_102385	2778263735	B	0.907418	0.877269	0.564336	0.550665	0.637966	0.375489	0.944853	sulfate thiol esterase SoxB
Ga0265800_102386	2778263736	B	0	1.32161	0.779328	0.622186	2.64302	0.907439	2.34866	uncharacterized protein GlcG (DUF336 family)
Ga0265800_102387	2778263737	B	5.28861	3.25366	1.82725	2.04234	2.32387	1.64132	5.34945	uncharacterized protein (DUF302 family)
Ga0265800_102388	2778263738	B	0	1.40898	0.949539	0.568557	1.2076	1.02666	2.79349	signal transduction histidine kinase
Ga0265800_102389	2778263739	B	0	1.26823	0.498568	1.06143	0.634069	0.912255	1.93182	winged helix family two component transcriptional regulator
Ga0265800_102390	2778263740	B	0	0.25183	0.395998	1.10652	1.00725	2.76657	3.83598	LTXXQ motif family protein
Ga0265800_102391	2778263741	B	0	3.68711	0.724738	3.90557	3.22598	5.60574	9.90663	general secretion pathway protein B
Ga0265800_102392	2778263742	B	0	2.8562	0.320809	1.53673	2.85599	1.60091	2.90046	hypothetical protein
Ga0265800_102393	2778263743	B	0	1.49505	1.17547	1.40768	2.09291	1.93573	2.17611	DNA-binding transcriptional LysR family regulator
Ga0265800_102394	2778263744	B	8.81351	7.45559	0.685155	12.0948	3.38865	5.85043	4.81798	ribulose 1,5-bisphosphate carboxylase large subunit
Ga0265800_102395	2778263745	B	4.55692	15.6196	0.31489	12.5698	2.00236	4.71413	4.20264	ribulose 1,5-bisphosphate carboxylase small subunit
Ga0265800_102396	2778263746	B	3.54879	6.86177	0.490454	6.8523	2.18312	2.44748	2.85058	probable Rubsico expression protein CbbX
Ga0265800_102397	2778263747	B	0	3.30159	0.64896	2.461	0.412667	1.45731	1.46682	HAD superfamily hydrolase (TIGR01509 family)
Ga0265800_102398	2778263748	B	7.50739	3.73895	0.86462	1.93279	0.879686	1.63957	1.78677	ribulose-5-phosphate 3-epimerase
Ga0265800_102399	2778263749	B	1.50884	2.6522	0.208526	1.08212	1.4586	0.624356	0.942651	D-fructose 1,6-bisphosphatase
Ga0265800_102400	2778263750	B	5.73519	2.01623	0.660517	0.632798	0.672026	0.329613	0.568742	phosphoribulokinase
Ga0265800_102401	2778263751	B	2.25777	4.12534	0.41604	0.705821	1.32278	1.0726	2.11832	transketolase
Ga0265800_102402	2778263752	B	2.42865	7.47077	2.68517	3.08163	5.54929	2.93117	10.6934	phosphoglycolate phosphatase
Ga0265800_102403	2778263753	B	9.83996	6.48615	3.73976	7.59992	16.8627	7.29524	34.836	protein required for attachment to host cells
Ga0265800_102404	2778263754	B	0	5.6846	1.53638	2.56468	7.10521	4.39102	10.6434	universal stress protein family protein
Ga0265800_102405	2778263755	B	5.53794	4.62386	2.10474	2.90242	5.1102	4.48771	6.42542	LuxR family two component transcriptional regulator
Ga0265800_102406	2778263756	B	1.16125	5.40922	1.84562	3.33133	4.7965	5.04551	8.36047	PAS domain S-box-containing protein
Ga0265800_102407	2778263757	B	0	1.7835	1.00161	0.639721	4.84057	0.999657	5.95087	hypothetical protein
Ga0265800_102408	2778263758	B	0	1.41266	0.740458	2.36462	5.88563	1.5704	16.0191	putative phosphoribosyl transferase
Ga0265800_102409	2778263759	B	0	3.08048	0.968797	1.16018	4.92839	1.69208	10.8444	ElaB/YqjD/DUF883 family membrane-anchored ribosome-binding protein
Ga0265800_102410	2778263760	B	5.78363	0.508315	0.399657	2.2335	9.14898	2.99157	14.7975	uncharacterized membrane protein YqjE
Ga0265800_102411	2778263761	B	0	0.934011	0	1.75885	4.6697	3.66461	11.3818	hypothetical protein
Ga0265800_102412	2778263762	B	4.03574	5.32044	1.95213	4.67553	12.4134	9.32409	24.2529	nucleotide-binding universal stress UspA family protein
Ga0265800_102413	2778263763	B	8.01832	5.63775	2.77039	5.75062	18.3213	9.67742	14.5513	hypothetical protein
Ga0265800_102414	2778263764	B	0	4.32903	1.36146	5.4347	7.79167	4.75581	13.1883	hypothetical protein
Ga0265800_102415	2778263765	B	1.11916	2.36067	1.46938	3.21058	9.34362	1.54369	12.9185	cytochrome c oxidase accessory protein FixG
Ga0265800_102416	2778263766	B	1.82689	0.963378	2.27234	4.83773	32.9129	4.03182	51.1979	cytochrome c oxidase cbb3-type subunit 3
Ga0265800_102417	2778263767	B	0	0	1.63123	2.60463	31.1185	3.25609	67.4198	cytochrome c oxidase cbb3-type subunit 4
Ga0265800_102418	2778263768	B	2.86534	0.755491	2.57399	4.90032	24.9293	1.48209	65.8084	cytochrome c oxidase cbb3-type subunit 2
Ga0265800_102419	2778263769	B	1.11916	0.885252	2.78408	3.33406	27.1457	1.38932	42.0184	cytochrome c oxidase cbb3-type subunit 1
Ga0265800_102420	2778263770	B	0	0	1.67407	4.00954	8.51618	0	7.92805	cbb3-type cytochrome oxidase maturation protein
Ga0265800_102421	2778263771	B	0.664515	0.934453	1.60716	1.4664	17.9285	1.90191	41.5355	Cu2+-exporting ATPase
Ga0265800_102422	2778263772	B	4.43422	2.72802	2.14488	1.95702	26.1091	1.07034	51.712	nucleotide-binding universal stress UspA family protein
Ga0265800_102423	2778263773	B	14.1945	1.24754	2.94258	3.65439	34.0967	1.95789	64.047	nucleotide-binding universal stress UspA family protein
Ga0265800_102424	2778263774	B	0	0.727983	1.03026	2.60466	15.7232	0.828313	33.8828	two-component system nitrate/nitrite sensor histidine kinase NarX
Ga0265800_102425	2778263775	B	0	1.78666	1.05356	0.841119	4.91293	0.963872	10.7348	LuxR family two component transcriptional regulator
Ga0265800_102426	2778263776	B	0	0.420093	0.412868	0.197771	1.26018	0.288443	1.70641	NNP family nitrate/nitrite transporter-like MFS transporter
Ga0265800_102427	2778263777	B	0	0.300531	0.157526	0.0628815	0.701186	0.314437	0.508645	NNP family nitrate/nitrite transporter-like MFS transporter
Ga0265800_102428	2778263778	B	0	0.389106	0.111248	0.266448	0.318336	0.180424	0.431056	respiratory nitrate reductase alpha subunit apoprotein
Ga0265800_102429	2778263779	B	0	0.0915193	0.215868	0.114894	0.274537	0.287262	0.557624	respiratory nitrate reductase beta subunit
Ga0265800_102430	2778263780	B	0	1.14614	0.180228	1.00721	0.458421	0.809441	1.00871	respiratory nitrate reductase chaperone NarJ
Ga0265800_102431	2778263781	B	0	0.388684	0.458398	0.487957	0.582982	0.457502	1.77618	nitrate reductase gamma subunit
Ga0265800_102432	2778263782	B	4.09271	1.07911	0.141406	0.564467	1.79838	1.27017	3.531	peptidyl-prolyl cis-trans isomerase C
Ga0265800_102433	2778263783	B	2.45525	0.971048	0.678646	1.28679	7.98357	0.84665	16.0697	nitronate monooxygenase
Ga0265800_102434	2778263784	B	0.645415	1.47031	0.545904	1.2917	3.8053	1.02147	7.96021	ribonucleoside-diphosphate reductase class II
Ga0265800_102435	2778263785	B	5.16732	1.02183	0.535604	0.641409	1.36234	1.2473	3.30516	uncharacterized protein involved in response to NO
Ga0265800_102436	2778263786	B	0	3.75567	1.96857	1.41447	5.75826	2.94709	8.05148	nitroreductase
Ga0265800_102437	2778263787	B	6.74836	6.8207	2.56477	6.70129	13.9369	9.88998	26.3001	hemerythrin HHE cation binding domain-containing protein
Ga0265800_102438	2778263788	B	2.52425	5.54632	2.26758	6.33624	11.9791	6.92003	24.8946	acyl-CoA dehydrogenase
Ga0265800_102439	2778263789	B	4.18287	6.24966	1.95104	7.15359	4.41119	7.78891	7.37313	malonyl-CoA/methylmalonyl-CoA synthetase
Ga0265800_102440	2778263790	B	5.08572	6.40666	2.46001	6.82718	4.61841	8.53477	10.3893	tripartite-type tricarboxylate transporter receptor subunit TctC
Ga0265800_102441	2778263791	B	0	1.85625	0.844949	0.919876	0.87921	1.07329	2.94326	malonyl-CoA decarboxylase
Ga0265800_102442	2778263792	B	2.65014	1.86333	0.366257	1.46203	1.63029	1.27939	2.75946	DNA-binding GntR family transcriptional regulator
Ga0265800_102443	2778263793	B	0	2.91383	1.14548	1.25745	2.73151	2.85812	5.11656	phosphatidylglycerol:prolipoprotein diacylglycerol transferase
Ga0265800_102444	2778263794	B	3.73958	8.54532	2.13189	7.16911	7.31227	9.34908	11.7928	dihydroxyacid dehydratase
Ga0265800_102445	2778263795	B	3.205	7.79323	3.83882	13.8504	10.6093	22.5827	19.197	glycine/D-amino acid oxidase-like deaminating enzyme
Ga0265800_102446	2778263796	B	11.0528	10.6856	3.81882	8.53665	1.94268	17.9134	13.1529	small Trp-rich protein
Ga0265800_102447	2778263797	B	15.3066	32.9593	8.46169	29.9775	18.8325	34.8363	35.7469	cytochrome c
Ga0265800_102448	2778263798	B	1.57979	4.65132	1.85582	5.35996	6.8029	6.26476	10.6687	acetyl-coenzyme A synthetase
Ga0265800_102449	2778263799	B	8.74823	1.53774	1.61204	1.28699	4.3566	2.61445	3.99067	uncharacterized protein (TIGR00645 family)
Ga0265800_102450	2778263800	B	2.3225	2.75564	2.00611	2.75475	3.57186	3.08337	4.0075	fumarase class II
Ga0265800_102451	2778263801	B	0	2.00976	3.1603	2.83845	1.0048	2.16846	3.06134	hypothetical protein
Ga0265800_102452	2778263802	B	2.05234	8.56791	4.11277	5.60456	8.65744	7.07713	11.5093	homodimeric fumarase (class I)
Ga0265800_102453	2778263803	B	6.41	9.38943	5.38911	3.94884	6.57211	7.69948	15.7962	acyl-CoA synthetase (AMP-forming)/AMP-acid ligase II
Ga0265800_102454	2778263804	B	4.89833	10.8703	5.33109	6.01264	7.42568	6.46081	11.0023	UMF1 family MFS transporter
Ga0265800_102455	2778263805	B	14.5804	20.7595	10.2768	15.6048	12.5573	15.4856	14.3143	hypothetical protein
Ga0265800_102459	2778263809	B	19.7244	25.8355	9.27709	26.5019	19.5149	37.4527	23.6046	ATP-dependent proteinase
Ga0265800_102460	2778263810	B	11.536	24.6711	12.0459	29.6287	19.7128	35.8018	27.3413	ATP-dependent Clp protease ATP-binding subunit ClpX
Ga0265800_102461	2778263811	B	26.7178	22.4383	5.74386	19.4892	21.393	26.4111	27.6434	ATP-dependent Clp protease proteolytic subunit ClpP
Ga0265800_102462	2778263812	B	20.9216	22.6061	9.43967	20.9794	21.3065	23.0862	30.5718	trigger factor
Ga0265800_102464	2778263814	B	0	1.40392	0.689884	0.9914	1.22833	0.826244	2.25731	squalene synthase HpnC
Ga0265800_102465	2778263815	B	2.02954	2.14048	2.24391	1.79145	2.49704	2.02957	4.28691	farnesyl-diphosphate farnesyltransferase
Ga0265800_102466	2778263816	B	1.27187	3.3535	1.75777	1.8945	3.35324	3.33323	7.30281	squalene-associated FAD-dependent desaturase
Ga0265800_102467	2778263817	B	0	3.79665	2.4583	1.96261	3.57304	4.46886	6.42578	putative hydrolase of the HAD superfamily
Ga0265800_102468	2778263818	B	0	2.48918	1.23606	1.80917	3.79898	2.62149	6.07545	ferrochelatase
Ga0265800_102469	2778263819	B	1.88979	1.49482	0.522349	1.98086	1.66078	2.34598	3.99172	pimeloyl-ACP methyl ester carboxylesterase
Ga0265800_102470	2778263820	B	0	1.90304	0.748121	1.36519	2.44658	1.27999	2.34663	amino acid/amide ABC transporter membrane protein 2 (HAAT family)
Ga0265800_102471	2778263821	B	1.71287	1.05379	0.828534	1.70092	1.80637	1.3585	2.54791	amino acid/amide ABC transporter membrane protein 1 (HAAT family)
Ga0265800_102472	2778263822	B	0	1.26823	1.32951	1.06143	2.74763	1.07812	4.22139	branched-chain amino acid transport system ATP-binding protein
Ga0265800_102473	2778263823	B	1.90436	1.84109	2.50029	1.78602	5.6902	2.62674	7.59176	branched-chain amino acid transport system ATP-binding protein
Ga0265800_102474	2778263824	B	0	1.08421	1.89433	1.81483	5.05926	2.17422	6.89149	amino acid/amide ABC transporter substrate-binding protein (HAAT family)
Ga0265800_102475	2778263825	B	0	0.911351	0.501578	0.858088	1.09354	1.21574	2.46792	transcriptional regulator with PAS, ATPase and Fis domain
Ga0265800_102476	2778263826	B	0	1.64299	0.484418	0.644568	3.69644	2.2562	2.91977	general L-amino acid transport system ATP-binding protein
Ga0265800_102477	2778263827	B	0	1.80151	1.31525	0.807727	2.5734	1.86804	2.265	amino acid ABC transporter membrane protein 2 (PAAT family)
Ga0265800_102478	2778263828	B	2.77994	2.44325	1.05654	1.61032	3.17598	2.44446	5.62383	amino acid ABC transporter membrane protein 1 (PAAT family)
Ga0265800_102479	2778263829	B	1.60179	2.67481	1.88167	2.03246	5.48998	3.53504	6.86211	amino acid ABC transporter substrate-binding protein (PAAT family)
Ga0265800_102480	2778263830	B	0	1.30046	0.657303	0.816303	2.22919	1.82228	2.29534	putative tricarboxylic transport membrane protein
Ga0265800_102481	2778263831	B	3.67543	3.23028	1.77784	2.23043	4.19905	3.54874	6.45132	putative tricarboxylic transport membrane protein
Ga0265800_102482	2778263832	B	1.74309	6.89391	3.49306	6.15443	9.19118	11.4204	13.1717	putative tricarboxylic transport membrane protein
Ga0265800_102483	2778263833	B	2.622	5.30022	2.71777	3.03767	2.99555	4.70159	5.69436	two-component system response regulator TctD
Ga0265800_102484	2778263834	B	3.37276	3.95236	1.39838	1.67462	2.76644	2.55868	5.31802	two-component system sensor histidine kinase TctE
Ga0265800_102485	2778263835	B	4.7315	7.48521	3.59649	4.17644	3.32651	4.89473	11.1203	heat shock protein Hsp15
Ga0265800_102486	2778263836	B	4.20477	3.58993	2.03389	2.94932	4.32871	2.96203	4.68203	TRAP transporter 4TM/12TM fusion protein
Ga0265800_102487	2778263837	B	1.70108	11.5119	5.64225	12.2937	12.5575	9.91331	18.4716	hypothetical protein
Ga0265800_102488	2778263838	B	3.62877	5.74069	1.83886	2.6025	2.44492	3.33684	6.47737	adenosylmethionine-8-amino-7-oxononanoate aminotransferase
Ga0265800_102489	2778263839	B	212.398	100.125	109.411	233.287	305.443	370.87	315.944	hypothetical protein
Ga0265800_102490	2778263840	B	28.1158	23.1044	19.817	26.2135	41.14	36.6965	56.7112	predicted MFS family arabinose efflux permease
Ga0265800_102491	2778263841	B	11.2757	12.883	18.7	21.772	36.6644	36.5493	41.9316	uncharacterized membrane protein
Ga0265800_102493	2778263843	B	20.4553	18.0902	10.4245	19.96	22.583	19.4416	28.3735	aspartate kinase
Ga0265800_102494	2778263844	B	12.6479	11.4337	7.6162	9.5693	14.6086	9.03436	26.5007	tRNA(Ile)-lysidine synthase
Ga0265800_102495	2778263845	B	13.6556	13.3519	7.90286	13.9371	14.851	14.3033	24.5277	acetyl-CoA carboxylase carboxyltransferase subunit alpha
Ga0265800_102496	2778263846	B	8.40109	5.66076	4.64423	5.71615	7.62915	6.1802	11.4969	DNA-3-methyladenine glycosylase II
Ga0265800_102497	2778263847	B	5.8475	5.55043	4.04071	6.25834	5.44723	6.1702	9.6028	cysteinyl-tRNA synthetase
Ga0265800_102498	2778263848	B	3.35129	5.30172	3.70527	5.91629	10.3081	6.35598	18.0459	tetratricopeptide repeat protein
Ga0265800_102499	2778263849	B	10.4326	9.39833	5.94752	7.19436	11.2313	9.9831	14.1219	peptidyl-prolyl cis-trans isomerase A (cyclophilin A)
Ga0265800_102500	2778263850	B	3.73095	15.0838	9.02349	13.1731	13.7711	15.1813	21.0893	peptidyl-prolyl cis-trans isomerase B (cyclophilin B)
Ga0265800_102501	2778263851	B	11.2577	14.0498	6.53457	12.5455	14.6424	16.3045	23.3103	UDP-2,3-diacylglucosamine hydrolase
Ga0265800_102502	2778263852	B	13.5711	10.9335	6.0956	13.726	12.9204	21.7609	27.9255	hypothetical protein
Ga0265800_102503	2778263853	B	10.7836	11.6224	5.41222	17.5341	13.8661	27.2822	25.952	uncharacterized protein DUF349
Ga0265800_102504	2778263854	B	12.5911	42.9734	35.0925	98.4052	131.308	114.334	212.328	transglycosylase-like protein with SLT domain
Ga0265800_102505	2778263855	B	24.8042	27.9959	21.1094	47.822	65.8542	48.3486	92.008	serine hydroxymethyltransferase
Ga0265800_102506	2778263856	B	17.4241	24.8849	18.6625	43.016	56.6567	49.5692	87.0858	transcriptional repressor NrdR
Ga0265800_102507	2778263857	B	0	25.9352	19.9834	23.4427	49.2731	40.3976	77.782	type IV fimbrial biogenesis protein FimT
Ga0265800_102508	2778263858	B	13.051	21.2202	18.9387	21.24	31.5411	31.7279	55.7166	type IV fimbrial biogenesis protein FimT
Ga0265800_102509	2778263859	B	5.83811	13.9393	8.47187	9.15236	23.6437	9.73033	29.2369	type IV pilus assembly protein PilY1
Ga0265800_102510	2778263860	B	3.70298	11.0653	5.88527	6.74144	13.017	6.38454	18.7279	PilX-like prepilin protein
Ga0265800_102511	2778263861	B	7.10105	9.67357	4.74337	6.65977	9.88086	5.67276	20.9849	type IV pilus assembly protein PilW
Ga0265800_102512	2778263862	B	3.24135	10.5405	5.82353	6.97393	11.3942	7.37696	20.6361	type IV pilus assembly protein PilV
Ga0265800_102513	2778263863	B	5.23261	3.67909	5.06214	4.90744	7.35763	3.60875	12.6093	type IV pilus assembly protein PilE
Ga0265800_102514	2778263864	B	0	2.30258	2.615	1.60593	2.30241	1.95742	6.27866	diaminohydroxyphosphoribosylaminopyrimidine deaminase/5-amino-6-(5-phosphoribosylamino)uracil reductase
Ga0265800_102515	2778263865	B	0	7.14073	3.3686	6.57399	9.99627	9.15215	15.3084	riboflavin synthase alpha chain
Ga0265800_102516	2778263866	B	5.77096	5.07202	3.19026	7.0042	4.56447	6.5173	12.7477	3,4-dihydroxy 2-butanone 4-phosphate synthase/GTP cyclohydrolase II
Ga0265800_102517	2778263867	B	4.17208	4.40014	3.45956	9.66694	4.76645	9.35134	12.5361	6,7-dimethyl-8-ribityllumazine synthase
Ga0265800_102518	2778263868	B	0	6.75483	2.41405	6.74551	3.68417	6.14381	9.24992	NusB antitermination factor
Ga0265800_102519	2778263869	B	1.37833	2.4228	2.47637	3.0416	2.78601	3.46965	5.20771	aspartate/methionine/tyrosine aminotransferase
Ga0265800_102520	2778263870	B	5.07149	3.12008	1.05134	2.79784	5.794	3.14786	4.37544	acyl-CoA thioester hydrolase
Ga0265800_102521	2778263871	B	2.54108	5.13664	1.22915	6.44858	3.79636	4.20599	6.19899	cell division and transport-associated protein TolQ
Ga0265800_102522	2778263872	B	14.0598	4.5309	1.61926	2.06841	3.29495	5.49473	5.15881	cell division and transport-associated protein TolR
Ga0265800_102523	2778263873	B	5.38118	3.6259	1.23949	2.37495	2.99509	1.97931	3.73545	cell division and transport-associated protein TolA
Ga0265800_102524	2778263874	B	1.76998	2.76121	1.37597	2.27028	2.83878	2.3651	4.02827	DNA polymerase III alpha subunit
Ga0265800_102525	2778263875	B	2.26185	3.57824	1.09408	2.62042	3.57797	3.35383	5.45052	UPF0176 protein
Ga0265800_102526	2778263876	B	0	3.82009	1.30587	2.71066	2.3251	4.88746	8.48944	hypothetical protein
Ga0265800_102527	2778263877	B	3.32871	5.266	0.920075	2.93821	5.2656	4.36182	7.32818	multimeric flavodoxin WrbA
Ga0265800_102528	2778263878	B	0	1.93125	2.1258	2.18206	3.86221	4.54638	8.36767	putative oxidoreductase
Ga0265800_102529	2778263879	B	0	2.19938	2.07509	1.2425	2.63906	1.81216	2.82905	hypothetical protein
Ga0265800_102530	2778263880	B	0	2.19909	0.494003	0.985983	1.88479	1.84889	4.04095	LysR family transcriptional regulator
Ga0265800_102531	2778263881	B	4.65446	5.18161	1.92978	2.65337	4.63582	4.81503	8.30825	hypothetical protein
Ga0265800_102532	2778263882	B	0	6.38473	1.98155	5.06239	7.56029	5.33973	9.32736	glutamyl-Q tRNA(Asp) synthetase
Ga0265800_102533	2778263883	B	8.35374	11.5024	5.77256	7.68099	8.32029	10.5623	9.44394	tRNA (guanine-N(7)-)-methyltransferase
Ga0265800_102534	2778263884	B	10.0167	9.0107	4.11231	8.15902	8.64754	10.9718	10.3774	alanyl-tRNA synthetase
Ga0265800_102535	2778263885	B	1.08238	4.28079	1.42108	3.94104	5.04144	5.74788	7.6638	succinate semialdehyde dehydrogenase
Ga0265800_102536	2778263886	B	12.5911	4.05758	2.03014	15.166	11.4341	61.6537	14.1718	putative transporter (transmembrane protein)
Ga0265800_102538	2778263888	B	6.91267	6.07545	3.34373	9.1526	9.11248	15.7325	12.7505	hypothetical protein
Ga0265800_102539	2778263889	B	1.94945	7.53872	3.36775	5.70001	8.56607	9.34405	9.68539	Fic family protein
Ga0265800_102540	2778263890	B	0	3.69657	0.484398	1.16018	5.54444	2.41726	5.00513	uncharacterized protein DUF4148
Ga0265800_102541	2778263891	B	4.05579	1.54465	0.653943	1.26792	2.25739	1.53842	3.98179	FSR family fosmidomycin resistance protein-like MFS transporter
Ga0265800_102542	2778263892	B	1.29522	2.73203	1.43202	1.64346	2.50418	2.54581	5.1634	sugar phosphate permease
Ga0265800_102543	2778263893	B	0.627382	2.81213	2.08095	2.00746	3.91462	3.00715	9.33234	penicillin amidase
Ga0265800_102544	2778263894	B	4.81296	2.36882	3.85796	5.49629	10.955	10.821	13.1302	DNA polymerase III alpha subunit
Ga0265800_102545	2778263895	B	16.0388	4.55419	7.92866	20.3511	31.6601	41.0549	43.7516	protein ImuB
Ga0265800_102546	2778263896	B	30.2347	13.6952	9.96417	39.2619	49.8714	82.6051	72.9274	protein ImuA
Ga0265800_102547	2778263897	B	34.1857	22.0333	20.0794	84.2396	82.8689	158.75	123.739	DNA-3-methyladenine glycosylase
Ga0265800_102548	2778263898	B	62.8222	31.9657	36.0997	134.253	130.759	337.603	191.323	hypothetical protein
Ga0265800_102549	2778263899	B	2.80036	16.7362	7.15985	14.2131	20.4264	15.0642	25.5765	3-oxoacid CoA-transferase subunit B
Ga0265800_102550	2778263900	B	4.95473	15.2413	5.47807	11.4804	14.1515	11.7036	17.7622	3-oxoacid CoA-transferase subunit A
Ga0265800_102551	2778263901	B	0	5.07605	1.87812	1.68684	4.17996	4.68611	4.75041	PAS domain S-box-containing protein
Ga0265800_102552	2778263902	B	0	7.21739	2.18254	3.65916	8.04955	6.64373	10.3361	uncharacterized peroxidase-related enzyme
Ga0265800_102553	2778263903	B	9.55451	7.13773	4.62162	3.68973	5.87768	3.95365	7.10619	acyl-CoA thioester hydrolase
Ga0265800_102554	2778263904	B	6.60413	6.3847	2.12966	4.00771	6.9646	5.92103	6.74559	hypothetical protein
Ga0265800_102555	2778263905	B	0.942026	4.38805	1.82267	3.74182	5.38116	4.093	7.25857	flavin-dependent dehydrogenase
Ga0265800_102556	2778263906	B	0	6.94903	2.7318	6.1636	11.3291	7.11251	14.1134	tripartite ATP-independent transporter DctP family solute receptor
Ga0265800_102557	2778263907	B	0	2.36686	1.32923	3.18361	2.36668	3.05125	4.12033	TRAP-type C4-dicarboxylate transport system permease small subunit
Ga0265800_102558	2778263908	B	3.81562	1.67675	1.75777	2.7365	5.25341	3.64024	5.90279	tripartite ATP-independent transporter DctM subunit
Ga0265800_102561	2778263909	B	8.41081	5.0513	3.7778	6.18677	6.77562	7.97588	15.0551	aminomethyltransferase
Ga0265800_102562	2778263910	B	11.1751	5.89299	2.70276	3.69905	7.36568	6.16567	14.6283	glycine cleavage system H protein
Ga0265800_102563	2778263911	B	4.18025	5.4191	2.74419	2.94036	5.41869	3.81994	8.42559	glycine dehydrogenase (decarboxylating)
Ga0265800_102564	2778263912	B	4.9797	7.65904	2.40874	1.64832	4.37626	4.12119	8.88881	hypothetical protein
Ga0265800_102565	2778263913	B	13.0681	19.9079	5.71914	17.0622	13.7814	14.5703	27.3439	HSP20 family protein
Ga0265800_102566	2778263914	B	20.286	29.8636	11.9152	22.1029	16.4906	26.4071	44.5088	HSP20 family molecular chaperone IbpA
Ga0265800_102567	2778263915	B	26.4431	21.846	8.40537	17.5057	28.816	26.2611	43.5823	response regulator receiver domain-containing protein
Ga0265800_102568	2778263916	B	15.9008	19.7979	9.33955	16.0823	18.6319	27.507	33.902	predicted DsbA family dithiol-disulfide isomerase
Ga0265800_102569	2778263917	B	16.4994	20.4466	6.84081	22.3919	24.07	39.2009	29.5989	NAD(P)-dependent dehydrogenase (short-subunit alcohol dehydrogenase family)
Ga0265800_102570	2778263918	B	0	22.769	11.5836	20.1772	13.3925	26.8004	27.6555	uncharacterized protein DUF3606
Ga0265800_102571	2778263919	B	3.7932	6.3342	2.00955	3.34821	5.2781	4.99227	8.9338	PAS domain S-box-containing protein
Ga0265800_102572	2778263920	B	1.50424	11.2375	3.84599	6.47293	11.6332	11.7229	21.615	chorismate synthase
Ga0265800_102573	2778263921	B	12.3083	10.457	6.52069	7.24295	16.2252	13.0159	21.3602	CBS domain-containing protein
Ga0265800_102574	2778263922	B	1.23995	1.85262	0.856824	1.77855	1.63454	1.92409	3.46753	O-acetylhomoserine sulfhydrylase
Ga0265800_102575	2778263923	B	0	2.02021	0.144397	1.26809	3.67282	2.23378	4.97335	pimeloyl-ACP methyl ester carboxylesterase
Ga0265800_102576	2778263924	B	0	1.7658	0.780942	1.52405	1.10354	1.68874	3.36217	hypothetical protein
Ga0265800_102577	2778263925	B	0	0.38625	0.60737	0.484902	3.47599	1.06082	1.1767	type IV pilus assembly protein PilE
Ga0265800_102578	2778263926	B	2.44916	1.29152	0.930825	0.472904	0.75333	0.633413	1.23867	PilC-like protein with beta-propeller domain
Ga0265800_102579	2778263927	B	0.607328	0.800658	0.419673	0.435566	0.800598	0.670165	0.867268	hypothetical protein
Ga0265800_102580	2778263928	B	0	0.315976	0.745298	0.396679	0	0.743842	1.06957	type IV pilus assembly protein PilX
Ga0265800_102581	2778263929	B	1.49063	0.917065	0.515023	0.246705	0.523997	0.822427	1.01997	type IV pilus assembly protein PilW
Ga0265800_102582	2778263930	B	0	0.847932	0.333339	0.266125	0.423934	1.82978	1.57863	type IV pilus assembly protein PilV
Ga0265800_102583	2778263931	B	0	0.806978	0.634478	0.675391	0.806917	1.0554	2.18528	type IV fimbrial biogenesis protein FimT
Ga0265800_102584	2778263932	B	0	2.28255	0.566726	1.50818	1.68175	1.31978	2.39925	tRNA-processing RNAse BN
Ga0265800_102585	2778263933	B	0	3.7998	2.61411	2.68329	3.32457	5.218	4.50178	uncharacterized membrane protein
Ga0265800_102586	2778263934	B	3.41158	3.69801	1.49305	3.51326	3.69773	4.98019	5.58222	FAD/FMN-containing dehydrogenase
Ga0265800_102587	2778263935	B	0	3.31983	0.870062	2.31542	4.05727	3.32872	4.86961	thymidylate synthase
Ga0265800_102588	2778263936	B	0	2.70498	3.19014	3.18361	1.69048	4.11255	4.57815	dihydrofolate reductase
Ga0265800_102589	2778263937	B	2.622	2.30444	1.08711	1.59116	4.14768	3.43578	4.52429	two-component system response regulator QseB
Ga0265800_102590	2778263938	B	0	2.06092	0.848769	1.23205	2.06076	1.11665	2.49149	signal transduction histidine kinase
Ga0265800_102591	2778263939	B	0	1.38267	0.724738	0.867905	2.30427	1.08498	2.41815	hypothetical protein
Ga0265800_102592	2778263940	B	0	0.902997	0.851966	1.02027	0.180586	1.13374	3.54569	short-subunit dehydrogenase
Ga0265800_102593	2778263941	B	2.5675	3.15915	1.59676	1.41644	2.70764	0.973891	2.06235	heme oxygenase-like protein
Ga0265800_102594	2778263942	B	1.09195	1.72746	0.603642	0.722887	1.24751	1.35554	2.63133	long-subunit acyl-CoA synthetase (AMP-forming)
Ga0265800_102595	2778263943	B	0	2.82531	0.740458	1.3301	1.41255	2.12466	2.39091	thermostable hemolysin
Ga0265800_102596	2778263944	B	0	1.56173	1.99532	1.59299	1.36641	0.995712	2.04848	exodeoxyribonuclease-3
Ga0265800_102597	2778263945	B	0	2.69056	2.11542	3.37775	6.0533	3.95867	4.55374	quinol monooxygenase YgiN
Ga0265800_102598	2778263946	B	0	2.74292	1.43773	1.14783	1.30605	1.53741	3.36018	3-isopropylmalate dehydrogenase
Ga0265800_102599	2778263947	B	2.37038	3.12494	1.47417	0.392308	1.24988	0.899123	2.39765	GntR family transcriptional regulator
Ga0265800_102600	2778263948	B	0	3.59802	1.75123	1.07547	1.37057	0.470564	2.20386	NitT/TauT family transport system permease protein
Ga0265800_102601	2778263949	B	0	3.98978	3.70727	1.59371	1.8134	1.35193	2.82384	NitT/TauT family transport system ATP-binding protein
Ga0265800_102602	2778263950	B	3.31094	6.54737	4.57582	2.1919	3.34618	2.56887	4.72805	NitT/TauT family transport system substrate-binding protein
Ga0265800_102603	2778263951	B	5.41189	17.8842	9.49883	8.12092	8.8463	9.06971	14.5226	Fis family nitrogen metabolism transcriptional regulator NtrC
Ga0265800_102604	2778263952	B	12.296	21.7487	7.54087	13.143	12.0217	12.4552	17.0101	nitrogen specific signal transduction histidine kinase NtrB
Ga0265800_102605	2778263953	B	19.2358	25.021	8.2412	20.3751	15.5524	24.41	32.047	hypothetical protein
Ga0265800_102606	2778263954	B	2.25879	8.93348	6.71168	4.7976	9.32981	6.54279	18.2446	L-glutamine synthetase
Ga0265800_102607	2778263955	B	0	4.91709	1.28867	2.74354	4.73462	4.64444	6.22618	molybdopterin-biosynthesis enzyme MoeA-like protein
Ga0265800_102608	2778263956	B	0	5.12167	2.01343	3.09124	3.34853	2.85966	5.66778	pimeloyl-ACP methyl ester carboxylesterase
Ga0265800_102609	2778263957	B	7.215	4.22744	2.16046	1.19411	6.34069	2.8197	4.79379	ribosomal small subunit pseudouridine synthase A
Ga0265800_102610	2778263958	B	4.43422	6.23547	4.28975	5.3818	2.72781	8.71565	11.8727	hypothetical protein
Ga0265800_102611	2778263959	B	8.01832	5.63775	4.9867	4.86591	4.93266	5.25346	9.30329	hypothetical protein
Ga0265800_102612	2778263960	B	10.5329	8.48577	4.85225	6.97294	5.86245	7.6879	9.24396	cation diffusion facilitator family transporter
Ga0265800_102613	2778263961	B	24.3426	15.6892	20.0732	64.9085	30.9482	57.4158	32.4923	predicted xylan-binding protein with Ca-dependent carbohydrate-binding module
Ga0265800_102615	2778263963	B	2.622	5.30022	2.71777	6.36464	6.45195	7.32363	9.5166	phosphoglycolate phosphatase
Ga0265800_102616	2778263964	B	2.47737	7.62063	2.73903	5.46686	5.44289	7.26135	10.0972	3-demethylubiquinone-9 3-methyltransferase
Ga0265800_102617	2778263965	B	40.6573	46.0064	29.324	61.6821	87.0929	86.9237	119.52	OOP family OmpA-OmpF porin
Ga0265800_102618	2778263966	B	7.04541	10.7846	5.39591	8.38905	13.3636	13.5444	16.9952	DNA gyrase subunit A
Ga0265800_102619	2778263967	B	3.04559	4.14892	2.94636	4.78854	6.6913	8.50675	11.2805	chorismate mutase
Ga0265800_102620	2778263968	B	3.88358	2.04793	2.28107	2.35674	4.2662	4.48626	7.56766	prephenate dehydrogenase
Ga0265800_102621	2778263969	B	8.98999	8.0987	4.24501	5.12492	6.05711	4.67589	10.0518	3-phosphoshikimate 1-carboxyvinyltransferase
Ga0265800_102622	2778263970	B	134.198	170.154	89.9443	75.018	93.9362	72.229	141.772	SSU ribosomal protein S1P
Ga0265800_102623	2778263971	B	120.615	104.02	32.8179	24.1212	34.4497	13.7774	68.4023	integration host factor subunit beta
Ga0265800_102624	2778263972	B	34.8103	84.8992	38.4871	21.6047	32.8864	28.2088	57.9942	uncharacterized integral membrane protein
Ga0265800_102625	2778263973	B	27.4924	57.4817	29.1964	14.2091	13.2249	13.4221	34.0936	lipopolysaccharide biosynthesis regulator YciM
Ga0265800_102626	2778263974	B	27.0039	46.3592	20.6505	11.2228	12.8151	8.00817	21.5303	D-alpha,beta-D-heptose 7-phosphate 1-kinase
Ga0265800_102627	2778263975	B	16.6664	19.3352	8.06172	3.40198	5.56578	3.16092	8.082	ADP-glyceromanno-heptose 6-epimerase precursor
Ga0265800_102628	2778263976	B	12.0091	17.9429	7.46864	4.63764	6.33231	5.38348	7.86	competence protein ComEA
Ga0265800_102629	2778263977	B	3.42091	9.32043	4.01863	2.07597	2.40509	0.943713	3.35849	uncharacterized damage-inducible protein DinB
Ga0265800_102630	2778263978	B	2.86877	7.70804	4.04969	2.80354	2.95333	2.6427	4.30389	5-oxoprolinase (ATP-hydrolysing)
Ga0265800_102631	2778263979	B	3.26275	2.29407	1.57823	1.62	1.14695	0.675062	1.16481	predicted MarR family transcription regulator
Ga0265800_102632	2778263980	B	0	6.901	3.06678	3.10759	3.90027	3.88485	5.78916	DNA-binding transcriptional LysR family regulator
Ga0265800_102633	2778263981	B	0	2.66205	2.28328	0.911444	2.66185	1.32931	3.44056	hypothetical protein
Ga0265800_102634	2778263982	B	10.2417	4.8007	1.7693	2.26006	2.55018	1.8247	5.02743	TRAP-type C4-dicarboxylate transport system substrate-binding protein
Ga0265800_102635	2778263983	B	3.75934	1.65202	2.59776	0.414791	3.63416	2.20378	2.90786	TRAP-type C4-dicarboxylate transport system permease small subunit
Ga0265800_102636	2778263984	B	1.23685	2.17409	1.45295	1.09175	1.84784	1.57807	2.24457	tripartite ATP-independent transporter DctM subunit
Ga0265800_102637	2778263985	B	1.18635	1.2512	0.983743	0.589038	0.938329	0.981821	2.22353	aspartyl-tRNA(Asn)/glutamyl-tRNA(Gln) amidotransferase subunit A
Ga0265800_102638	2778263986	B	0	1.38534	0.871364	0.43479	1.66228	0.7066	1.4068	nucleoside-diphosphate-sugar epimerase
Ga0265800_102639	2778263987	B	11.1751	2.94649	1.15833	0.308254	1.47314	1.34874	1.99476	quercetin dioxygenase-like cupin family protein
Ga0265800_102640	2778263988	B	0.9008	1.10838	1.12044	0.447258	1.26662	1.45994	2.3583	hypothetical protein
Ga0265800_102641	2778263989	B	2.20138	2.51519	1.52118	0.485782	3.4823	1.51821	3.01259	hypothetical protein
Ga0265800_102642	2778263990	B	0	2.73824	0.95685	1.05038	2.12958	1.25341	3.81054	TRAP-type C4-dicarboxylate transport system substrate-binding protein
Ga0265800_102643	2778263991	B	0	1.9527	2.30293	0.408572	2.92883	1.91536	3.52525	TRAP-type C4-dicarboxylate transport system permease small subunit
Ga0265800_102644	2778263992	B	1.24936	4.50198	2.50364	1.37849	4.64905	2.64566	4.6089	tripartite ATP-independent transporter DctM subunit
Ga0265800_102645	2778263993	B	0	12.6647	7.4681	2.48427	15.8297	2.79507	13.3968	hypothetical protein
Ga0265800_102646	2778263994	B	0	8.87934	4.29618	0.857477	10.9276	4.28778	14.3346	hypothetical protein
Ga0265800_102647	2778263995	B	0	21.1698	7.62875	4.42946	25.5783	8.6521	25.0808	sulfur carrier protein ThiS
Ga0265800_102648	2778263996	B	2.53072	21.5748	7.25737	4.60728	25.9101	11.3884	33.7672	pyridine nucleotide-disulfide oxidoreductase
Ga0265800_102649	2778263997	B	4.26302	20.7568	6.59862	4.23329	20.3056	6.35052	27.8001	phenylacetaldehyde:ferredoxin oxidoreductase
Ga0265800_102650	2778263998	B	4.06898	13.9471	7.59167	2.69374	17.8795	5.05122	14.7684	Fe-S-cluster-containing dehydrogenase component
Ga0265800_102651	2778263999	B	1.48614	8.35937	2.87545	3.19752	9.53418	6.71336	17.5525	GAF domain-containing protein
Ga0265800_102652	2778264000	B	2.08963	13.5905	4.33191	4.2654	12.6712	7.20574	14.2362	tungstate transport system substrate-binding protein
Ga0265800_102653	2778264001	B	0	4.39876	1.72924	1.79473	9.89647	3.36543	16.1553	amino acid ABC transporter ATP-binding protein (PAAT family)
Ga0265800_102654	2778264002	B	4.74076	7.70819	2.94834	0.784616	9.16581	3.43301	13.5397	tungstate transport system permease protein
Ga0265800_102655	2778264003	B	2.72624	2.75546	0.376775	1.27841	1.9167	1.55116	2.59539	putative molybdopterin biosynthesis protein
Ga0265800_102656	2778264004	B	0	4.64288	0.97938	2.06137	2.26465	2.62139	4.98314	ergothioneine biosynthesis protein EgtB
Ga0265800_102657	2778264005	B	0	5.84067	2.48742	3.20793	5.84022	3.72384	5.4369	TRAP-type mannitol/chloroaromatic compound transport system permease small subunit
Ga0265800_102658	2778264006	B	0.864541	3.34327	1.25456	2.9094	3.19106	2.98122	4.11523	GntP family gluconate:H+ symporter
Ga0265800_102659	2778264007	B	1.52279	4.55043	3.89341	8.23293	6.156	7.71909	11.0087	TRAP-type mannitol/chloroaromatic compound transport system substrate-binding protein
Ga0265800_102660	2778264008	B	4.37938	2.95088	2.01748	4.67097	4.61842	4.32911	6.21035	TRAP-type mannitol/chloroaromatic compound transport system substrate-binding protein
Ga0265800_102661	2778264009	B	13.1865	7.38826	4.38518	11.4122	9.70541	10.6573	19.0756	1-deoxy-D-xylulose-5-phosphate synthase
Ga0265800_102662	2778264010	B	5.32319	8.26531	5.02715	11.9426	14.0344	14.3789	26.711	farnesyl diphosphate synthase
Ga0265800_102663	2778264011	B	0	15.8032	6.62673	21.8235	23.1763	25.6284	39.9419	exodeoxyribonuclease VII small subunit
Ga0265800_102664	2778264012	B	36.7598	36.9053	15.534	38.9993	37.151	46.2673	52.6193	phenylpropionate dioxygenase-like ring-hydroxylating dioxygenase large terminal subunit
Ga0265800_102665	2778264013	B	26.8682	29.1803	18.6989	46.2679	54.6456	55.1269	75.1943	hypothetical protein
Ga0265800_102666	2778264014	B	45.7046	37.6586	22.6342	89.1958	85.0183	129.039	152.968	thiosulfate/3-mercaptopyruvate sulfurtransferase
Ga0265800_102667	2778264015	B	44.2798	38.9169	38.4175	216.598	163.006	486.237	335.041	hypothetical protein
Ga0265800_102668	2778264016	B	121.787	47.5243	47.1276	288.099	247.022	643.043	463.62	hypothetical protein
Ga0265800_102669	2778264017	B	13.0449	30.9555	9.91567	36.7028	33.246	86.8175	51.2276	hypothetical protein
Ga0265800_102670	2778264018	B	12.0369	8.99224	3.9925	3.71871	6.2412	4.48279	9.991	sodium/proton antiporter (CPA1 family)
Ga0265800_102671	2778264019	B	1.71287	6.62385	4.49776	3.40185	9.3329	5.67028	16.4085	tripartite-type tricarboxylate transporter receptor subunit TctC
Ga0265800_102672	2778264020	B	5.22928	5.66832	4.81801	6.25059	13.3272	10.0379	22.9727	tripartite-type tricarboxylate transporter receptor subunit TctC
Ga0265800_102673	2778264021	B	4.36648	6.26814	5.83345	10.1977	20.4659	14.8061	27.7127	muconate cycloisomerase
Ga0265800_102674	2778264022	B	17.1676	6.60115	8.89729	30.544	37.9066	41.1806	45.8068	hypothetical protein
Ga0265800_102675	2778264023	B	14.2654	8.77636	16.6171	75.7762	72.7129	174.139	115.072	hypothetical protein
Ga0265800_102676	2778264024	B	46.269	18.2993	31.5729	119.971	144.351	385.315	208.369	hypothetical protein
Ga0265800_102677	2778264025	B	6.34304	2.00693	1.84092	4.6891	6.13182	4.85577	8.90693	cardiolipin synthase
Ga0265800_102678	2778264026	B	0	3.8738	2.22573	11.1292	10.5776	15.082	19.1143	putative YhdH/YhfP family quinone oxidoreductase
Ga0265800_102679	2778264027	B	4.74076	6.66655	4.58631	24.5846	20.4147	38.744	40.0549	protein-tyrosine phosphatase
Ga0265800_102680	2778264028	B	12.2852	3.23919	4.6691	27.1101	16.7346	48.9297	39.838	NTP pyrophosphatase (non-canonical NTP hydrolase)
Ga0265800_102681	2778264029	B	29.7926	18.329	19.5578	78.8928	68.074	116.09	90.406	hypothetical protein
Ga0265800_102682	2778264030	B	3.04176	4.27738	3.15286	24.6678	16.3063	58.0041	34.1158	putative membrane protein
Ga0265800_102683	2778264031	B	16.3329	10.0483	5.64313	52.261	68.8975	116.021	71.9139	hypothetical protein
Ga0265800_102684	2778264032	B	2.9876	2.29754	1.54836	3.13158	4.85729	3.68304	6.66611	DNA helicase-2/ATP-dependent DNA helicase PcrA
Ga0265800_102685	2778264033	B	5.52151	4.04399	4.19699	8.73219	12.4545	9.64692	11.1153	uncharacterized protein YecE (DUF72 family)
Ga0265800_102686	2778264034	B	0	6.7335	6.30255	23.1459	18.5959	31.1996	36.0343	uncharacterized protein DUF4019
Ga0265800_102687	2778264035	B	20.54	15.1188	14.016	44.0512	40.3889	74.8125	76.4596	predicted outer membrane protein
Ga0265800_102688	2778264036	B	9.5734	11.7795	3.63845	10.827	14.7233	16.5061	21.4319	putative membrane protein
Ga0265800_102689	2778264037	B	4.36779	18.1383	5.65914	17.2288	28.4049	22.2158	15.853	hypothetical protein
Ga0265800_102690	2778264038	B	16.442	10.5972	7.06949	24.9949	24.0826	55.8155	29.3491	uncharacterized protein (TIGR02284 family)
Ga0265800_102691	2778264039	B	0	12.8017	1.86925	10.5612	9.14338	10.3326	12.7524	zinc and cadmium transporter
Ga0265800_102692	2778264040	B	10.4326	14.4413	5.58706	20.8636	13.2942	24.1033	23.6659	DNA-binding NarL/FixJ family response regulator
Ga0265800_102693	2778264041	B	0	0.704719	0.554078	0.88471	0	0	1.43128	PilZ domain-containing protein
Ga0265800_102694	2778264042	B	0	1.90657	0.856585	1.0258	5.17459	1.38923	6.82249	prepilin peptidase CpaA
Ga0265800_102695	2778264043	B	0	2.6538	1.11281	1.88791	5.30719	2.15186	7.90508	pilus assembly protein CpaB
Ga0265800_102696	2778264044	B	0	2.09277	0.632852	1.11154	2.49503	1.6422	5.8579	pilus assembly protein CpaC
Ga0265800_102697	2778264045	B	0	2.37463	1.86703	1.49056	6.33186	1.55282	6.96632	hypothetical protein
Ga0265800_102698	2778264046	B	15.2392	5.35742	6.31832	9.2479	34.8206	25.7494	40.8032	pilus assembly protein Flp/PilA
Ga0265800_102699	2778264047	B	0	8.22255	2.15496	0.860221	12.3329	1.07538	26.9054	pilus assembly protein Flp/PilA
Ga0265800_102700	2778264048	B	0	0.889685	0.524629	0.837688	4.22568	2.26895	7.07718	putative Flp pilus-assembly TadE/G-like protein
Ga0265800_102701	2778264049	B	0	1.58736	0.624024	1.24549	1.19043	1.40131	2.28361	Flp pilus assembly protein TadG
Ga0265800_102702	2778264050	B	0	0.408029	0	1.53673	2.44799	0.320182	3.31481	TadE-like protein
Ga0265800_102703	2778264051	B	0	0.249234	0.489893	0.62578	2.24293	1.22234	4.47135	pilus assembly protein CpaE
Ga0265800_102704	2778264052	B	3.44329	0.807002	0.237936	1.20308	2.82429	2.09766	4.71215	pilus assembly protein CpaF
Ga0265800_102705	2778264053	B	0	1.17979	0.695699	1.01827	1.76955	2.66164	6.43963	tight adherence protein B
Ga0265800_102706	2778264054	B	0	1.61159	0.633548	0.606961	3.22294	2.6557	6.00072	tight adherence protein C
Ga0265800_102707	2778264055	B	1.02192	0.898154	0.635548	0.563775	2.33502	1.58577	4.68196	hypothetical protein
Ga0265800_102708	2778264056	B	0	0.538665	0.5294	1.18343	4.309	1.47942	3.92025	glycosyltransferase involved in cell wall biosynthesis
Ga0265800_102709	2778264057	B	0	1.03667	0.489044	0.390435	1.24391	1.05753	5.05313	methyltransferase family protein
Ga0265800_102710	2778264058	B	0	0.396841	0	0.249099	1.58724	0.311403	3.22392	putative flippase GtrA
Ga0265800_102711	2778264059	B	0	0.84141	0.367528	0.117368	0.934829	0.440171	1.55066	hypothetical protein
Ga0265800_102712	2778264060	B	12.7682	7.85524	4.4115	4.22637	13.4651	9.68633	18.233	peptidase inhibitor I78 family protein
Ga0265800_102713	2778264061	B	14.241	27.5358	18.6975	16.4987	45.0551	16.6966	66.093	hypothetical protein
Ga0265800_102714	2778264062	B	0	19.1592	8.47336	17.2878	27.5393	9.86627	47.4242	hypothetical protein
Ga0265800_102715	2778264063	B	0.54262	6.62893	2.88718	2.57443	4.72096	2.60087	6.53792	DNA polymerase I
Ga0265800_102716	2778264064	B	0	3.40818	4.91268	7.84419	11.3597	10.6976	13.2671	hypothetical protein
Ga0265800_102717	2778264065	B	5.06832	8.31503	2.80183	4.56696	6.08733	6.40832	10.1025	homoserine kinase
Ga0265800_102718	2778264066	B	2.29335	8.06238	2.69406	5.18731	5.03861	4.50769	9.82476	hypothetical protein
Ga0265800_102719	2778264067	B	4.6957	10.7302	4.70496	8.67826	9.49135	9.31057	14.9476	FecR family protein
Ga0265800_102720	2778264068	B	5.99018	10.7049	6.62289	11.7866	7.37	14.115	17.7021	IclR family transcriptional regulator
Ga0265800_102721	2778264069	B	0	0.616012	0.581199	0.850681	0.862351	0.531725	0.959186	hypothetical protein
Ga0265800_102722	2778264070	B	0	0.721175	0	0.679027	0.36056	0.565908	0.366174	peroxiredoxin family protein
Ga0265800_102723	2778264071	B	0	0	0.828342	0.661317	0	0.826723	1.78312	tRNA 2-thiouridine synthesizing protein A
Ga0265800_102724	2778264072	B	0	1.21269	0.635644	1.01495	0.4042	0.475802	2.87345	hypothetical protein
Ga0265800_102725	2778264073	B	1.80685	3.17602	0.749135	0.697761	1.27031	1.18381	2.7952	hypothetical protein
Ga0265800_102726	2778264074	B	0	3.34878	1.08415	2.10204	5.90917	2.31865	7.73485	hypothetical protein
Ga0265800_102727	2778264075	B	0	3.63857	0.572157	3.65431	10.1872	7.42351	11.0848	hypothetical protein
Ga0265800_102728	2778264076	B	4.38322	3.85235	2.87743	3.86902	5.39288	4.53443	11.1493	trehalose 6-phosphatase
Ga0265800_102729	2778264077	B	0	3.44967	2.906	2.0107	4.68134	3.43204	8.71608	transporter (CPA2 family)
Ga0265800_102730	2778264078	B	15.2392	13.3935	2.10611	2.52215	6.69626	4.20398	8.16063	hypothetical protein
Ga0265800_102731	2778264079	B	2.46137	4.65101	2.89143	5.15997	7.8953	6.40813	12.6315	uncharacterized membrane protein (DUF4010 family)
Ga0265800_102732	2778264080	B	0	3.83994	8.05097	12.0517	14.0787	10.0441	23.8299	hypothetical protein
Ga0265800_102733	2778264081	B	7.04696	9.75473	5.47825	7.19219	14.8632	11.0566	17.5056	hypothetical protein
Ga0265800_102734	2778264082	B	10.5382	15.4602	9.69075	21.3319	29.8495	24.515	41.8902	TRAP transporter 4TM/12TM fusion protein
Ga0265800_102735	2778264083	B	12.7682	21.3214	13.2345	50.012	71.8139	89.3784	104.84	hypothetical protein
Ga0265800_102736	2778264084	B	2.465	5.1995	3.06604	1.76786	1.94966	1.27502	3.2267	hemerythrin HHE cation binding domain-containing protein
Ga0265800_102737	2778264085	B	2.41327	4.66618	3.25183	1.06508	1.90875	1.16504	3.66155	pyridoxamine 5'-phosphate oxidase
Ga0265800_102738	2778264086	B	0	4.46514	3.78072	2.58719	0.686892	3.09952	3.95299	hypothetical protein
Ga0265800_102739	2778264087	B	9.8667	6.64831	4.43173	2.9938	1.01162	0.907296	3.62027	predicted dehydrogenase
Ga0265800_102740	2778264088	B	5.03389	8.25854	4.75394	3.33252	1.32717	1.21509	3.49437	tripartite-type tricarboxylate transporter receptor subunit TctC
Ga0265800_102741	2778264089	B	5.69114	14.8389	5.50573	5.12816	4.16791	1.56999	6.32099	polysaccharide deacetylase
Ga0265800_102742	2778264090	B	10.0939	22.977	9.97435	8.63138	6.74178	2.47131	15.3752	gamma-glutamyltransferase 1
Ga0265800_102743	2778264091	B	34.0774	34.9418	23.0247	22.4902	31.0571	10.8805	59.5142	O-acetylhomoserine sulfhydrylase
Ga0265800_102744	2778264092	B	90.2244	102.513	105.157	95.8435	220.595	75.1434	544.002	Crp/Fnr family transcriptional regulator
Ga0265800_102745	2778264093	B	66.241	74.4363	54.6013	47.246	129.734	46.3367	257.455	response regulator receiver domain-containing protein
Ga0265800_102746	2778264094	B	3.30643	5.52135	2.97023	4.37782	8.42669	4.90271	9.7383	menaquinone-dependent protoporphyrinogen oxidase
Ga0265800_102747	2778264095	B	10.6308	8.40895	5.14224	10.1657	9.03115	15.1522	23.9309	Cu-Zn family superoxide dismutase
Ga0265800_102748	2778264096	B	0	12.6277	5.43697	10.0024	14.1299	14.2737	31.3459	molybdenum cofactor cytidylyltransferase
Ga0265800_102749	2778264097	B	5.12086	9.00131	3.7745	5.36765	7.35051	9.30009	16.6565	xanthine dehydrogenase accessory factor
Ga0265800_102750	2778264098	B	0	4.84009	2.09301	3.19005	7.0176	5.2223	7.29071	pyridoxamine 5'-phosphate oxidase
Ga0265800_102751	2778264099	B	0	3.61279	1.60551	2.66215	2.82718	4.06756	6.16777	hypothetical protein
Ga0265800_102752	2778264100	B	0	3.5831	2.34764	3.37369	5.97138	3.74889	4.95256	YggT family protein
Ga0265800_102753	2778264101	B	5.63266	6.4356	0.973063	4.97188	4.95009	3.78753	11.8138	hypothetical protein
Ga0265800_102754	2778264102	B	0	2.15392	1.3306	1.4486	2.61528	1.99201	4.21835	FlaA1/EpsC-like NDP-sugar epimerase
Ga0265800_102755	2778264103	B	1.07766	2.7467	1.19148	1.90247	3.88297	2.26682	4.777	dTDP-4-amino-4,6-dideoxygalactose transaminase
Ga0265800_102756	2778264104	B	8.85275	3.37157	2.03913	2.60474	4.40865	2.64569	6.40867	sugar O-acyltransferase (sialic acid O-acetyltransferase NeuD family)
Ga0265800_102757	2778264105	B	2.85216	1.62937	1.08399	1.02276	1.12794	1.08187	3.13953	GDP/UDP-N,N'-diacetylbacillosamine 2-epimerase (hydrolysing)
Ga0265800_102758	2778264106	B	0	1.12624	1.54961	1.76736	2.53384	1.98846	2.6686	N-acetylneuraminate synthase
Ga0265800_102759	2778264107	B	0	1.30639	0.855948	0.9567	1.30629	1.96483	2.65327	N-acylneuraminate cytidylyltransferase
Ga0265800_102760	2778264108	B	2.80036	2.4612	2.1286	1.39042	2.95322	3.0901	4.24887	glutamine amidotransferase
Ga0265800_102761	2778264109	B	0	3.30381	1.0696	2.07382	3.49789	3.58377	5.26275	cyclase
Ga0265800_102762	2778264110	B	1.23068	4.00203	1.53076	3.53051	3.13649	2.71603	5.71162	N-acetyl sugar amidotransferase
Ga0265800_102763	2778264111	B	2.71874	0.716839	0.657542	0.524957	0.477856	0.93751	0.889711	hypothetical protein
Ga0265800_102764	2778264112	B	0	0.619798	0.913706	1.31304	1.39444	1.33748	2.2029	asparagine synthase (glutamine-hydrolysing)
Ga0265800_102765	2778264113	B	0	2.34044	2.07017	1.10183	2.34027	2.64005	6.53594	lipopolysaccharide/colanic/teichoic acid biosynthesis glycosyltransferase
Ga0265800_102766	2778264114	B	2.1256	2.80224	1.02817	2.46257	3.54924	2.78531	5.5016	HpcH/HpaI aldolase/citrate lyase family protein
Ga0265800_102767	2778264115	B	2.19847	1.93221	0.455754	1.51607	3.0913	1.97107	4.0878	peptidoglycan biosynthesis protein MviN/MurJ (putative lipid II flippase)
Ga0265800_102768	2778264116	B	2.07824	3.92705	2.94399	2.75166	4.56599	5.01651	6.67741	lysyl-tRNA synthetase class II
Ga0265800_1031	2778264117	B	0	1.29655	0.436887	0.348794	0.92604	0.290689	1.00316	Asp/Glu/hydantoin racemase
Ga0265800_1032	2778264118	B	0	0.369607	0.387466	0.386673	0.492772	0.821757	1.33452	isovaleryl-CoA dehydrogenase
Ga0265800_1033	2778264119	B	0	0.352695	0.138651	0.221388	0.440836	0.345951	0.328313	acyl-CoA synthetase (AMP-forming)/AMP-acid ligase II
Ga0265800_1034	2778264120	B	0	1.38267	0.724738	0.723254	1.38256	1.26581	1.17007	DDE family transposase
Ga0265800_1035	2778264121	B	0	2.62056	0	1.37078	2.18363	2.74181	2.36548	hypothetical protein
Ga0265800_1036	2778264122	B	0	1.33646	1.05078	0.35953	2.86364	1.49818	1.80956	NAD(P)-dependent dehydrogenase (short-subunit alcohol dehydrogenase family)
Ga0265800_1037	2778264123	B	1.33729	0.470131	0.0924088	0.221327	0.352571	0.368913	1.15375	amino acid/amide ABC transporter substrate-binding protein (HAAT family)
Ga0265800_1038	2778264124	B	2.21123	0.971709	0.305599	0.243978	1.16596	1.14376	0.723628	gluconate 5-dehydrogenase
Ga0265800_1039	2778264125	B	0	1.30771	0.734411	0.820856	1.30761	1.46595	1.83387	3-oxoacyl-[acyl-carrier protein] reductase
Ga0265800_10310	2778264126	B	1.74309	2.14477	0.963602	1.92326	1.22549	2.28408	3.05957	pimeloyl-ACP methyl ester carboxylesterase
Ga0265800_10311	2778264127	B	0	2.8847	0.850524	0.679027	2.88448	2.12216	1.34264	uncharacterized protein (TIGR00369 family)
Ga0265800_10312	2778264128	B	0	4.90731	0.45392	0.905982	2.88644	3.73753	2.14968	uncharacterized protein (TIGR00369 family)
Ga0265800_10313	2778264129	B	0	7.9004	3.2537	4.95912	4.89036	7.38033	11.0791	nucleotide-binding universal stress UspA family protein
Ga0265800_10314	2778264130	B	0	4.6898	1.98547	2.20786	3.42691	2.86624	4.45718	EmrB/QacA subfamily drug resistance transporter
Ga0265800_10315	2778264131	B	1.47285	3.49506	2.64618	4.46899	4.91861	4.9265	7.36134	membrane fusion protein (multidrug efflux system)
Ga0265800_10316	2778264132	B	0	2.38105	2.80811	7.47297	8.72985	9.18638	15.3136	MarR family transcriptional regulator
Ga0265800_10317	2778264133	B	0	1.50732	1.97519	2.20768	3.51681	2.75986	2.72119	transposase IS66 family protein
Ga0265800_10318	2778264134	B	0	2.8833	1.29541	1.03421	1.64748	2.10093	1.67313	IstB-like ATP binding protein
Ga0265800_10319	2778264135	B	0	3.7043	0.649636	2.11137	1.6271	2.33242	3.03031	IstB-like ATP binding protein
Ga0265800_10320	2778264136	B	0	2.28136	1.10381	2.9742	2.28119	2.61644	5.64327	transposase IS66-like protein
Ga0265800_10321	2778264137	B	0	3.71934	2.65845	2.12241	4.73335	5.17385	4.57815	hypothetical protein
Ga0265800_10322	2778264138	B	0	0.120803	0.09498	0.227485	0.603968	0.426575	0.204458	hypothetical protein
Ga0265800_10323	2778264139	B	0	0.276305	0.217242	0	0.0920947	0.144545	0.436467	anion transporter
Ga0265800_10324	2778264140	B	0	0.73836	0.580528	0.772453	0.246102	0.965657	1.83285	DNA-binding MarR family transcriptional regulator
Ga0265800_10325	2778264141	B	0.682887	1.26038	0.566262	0.715797	1.38031	1.57773	3.9413	trehalose 6-phosphate synthase
Ga0265800_10326	2778264142	B	0	1.26823	0.830946	0.265358	2.74763	0.829322	5.15153	RNA polymerase sigma-28 (SigD/FliA/WhiG) subunit
Ga0265800_10327	2778264143	B	0	0.899256	0.989843	0.790254	1.61854	0.705649	3.16572	flagellar biosynthesis protein FlhG
Ga0265800_10328	2778264144	B	0	1.18561	0.279652	0.446527	0.474208	0.418658	1.42471	flagellar biosynthesis protein FlhF
Ga0265800_10329	2778264145	B	0.744648	0.785353	0.308738	0.49297	1.1125	0.333813	0.886135	flagellar biosynthesis protein FlhA
Ga0265800_10330	2778264146	B	0	0.376009	0.0985444	0	0.125327	0.24588	0.636391	flagellar biosynthetic protein FlhB
Ga0265800_10331	2778264147	B	2.81633	0	0	0.621486	0.247505	0.776929	1.00543	chemotaxis protein CheZ
Ga0265800_10332	2778264148	B	0	0.919773	0.361581	0.288673	1.83941	0	0	response regulator receiver protein
Ga0265800_10333	2778264149	B	0	0.667124	0.104904	0	0.533659	0.104699	0.903281	response regulator receiver-modulated CheB methylesterase
Ga0265800_10334	2778264150	B	0	0.71801	0	0	0	0.0939041	0.648119	CheD activator of MCP protein methylation
Ga0265800_10335	2778264151	B	0	0.359702	0.141406	0.112893	0.719351	0.56452	0.182638	chemotaxis protein methyltransferase CheR
Ga0265800_10336	2778264152	B	1.23068	0.324489	0	0.203683	0.324464	0.339503	0.585807	EAL and modified HD-GYP domain-containing signal transduction protein
Ga0265800_10337	2778264153	B	0	0.489087	0.164803	0.526289	0.558914	0.575682	0.851425	CheA signal transduction histidine kinase
Ga0265800_10338	2778264154	B	0	0.471233	0	0.0985983	0.628263	0.431408	0.319023	chemotaxis protein MotB
Ga0265800_10339	2778264155	B	0	0	0.505701	0	0.64314	0.252356	0.653154	flagellar transcriptional activator FlhD
Ga0265800_10340	2778264156	B	0	0	0	0	0	0.483452	0.208547	flagellar biosynthesis protein
Ga0265800_10341	2778264157	B	0	0.461221	0	0.28951	0	0.120641	0.67653	hypothetical protein
Ga0265800_10342	2778264158	B	0	0	0.45855	0.366089	1.74952	0.228827	0.789674	flagellar protein FliT
Ga0265800_10343	2778264159	B	0	0	0	0.253737	0	0.951603	1.09465	flagellar protein FliS
Ga0265800_10344	2778264160	B	0	0.0955474	0.300492	0.179926	0.28662	0.149953	0.226398	flagellar hook-associated protein 2
Ga0265800_10345	2778264161	B	0	0.474975	0	0	0.949877	0.372714	1.28622	flagellar protein FlaG
Ga0265800_10346	2778264162	B	0	0.168478	0.33116	0.211509	0.421163	0.264411	0.570295	flagellin
Ga0265800_10347	2778264163	B	0	0	0	0	0.616049	0.241726	0.208547	flagellar hook-basal body complex protein FliE
Ga0265800_10348	2778264164	B	0	0.238379	0.0624745	0.149632	0.0794538	0	0.430352	flagellar M-ring protein FliF
Ga0265800_10349	2778264165	B	0	0	0.115167	0.183891	0.146468	0.287356	0.297497	flagellar motor switch protein FliG
Ga0265800_10350	2778264166	B	0	0	0.353001	0.140911	0.44894	0.176156	0.379942	flagellar assembly protein FliH
Ga0265800_10351	2778264167	B	0	0.699624	0.235745	0.18821	0.199878	0.352927	0.845791	flagellum-specific ATP synthase
Ga0265800_10352	2778264168	B	0	1.1094	0.290752	0	0.739546	0.290184	0.375531	flagellar FliJ protein
Ga0265800_10353	2778264169	B	0	0.388169	0.0762985	0.304569	0.291105	0.494971	1.01831	flagellar hook-length control protein FliK
Ga0265800_10354	2778264170	B	0	0.340776	0.535863	0.855626	0	0.133704	0.807464	flagellar FliL protein
Ga0265800_10355	2778264171	B	0	0.583945	0.229561	0.0916362	1.02183	0.229112	0.296496	flagellar motor switch protein FliM
Ga0265800_10356	2778264172	B	0	0.343472	0	0	0	0.269524	0	flagellar motor switch protein FliN/FliY
Ga0265800_10357	2778264173	B	0	0	0.301007	0.240313	1.14845	0.751048	1.29592	flagellar protein FliO/FliZ
Ga0265800_10358	2778264174	B	0	0	0.633896	0.12652	0.201544	0.395411	0.204682	flagellar biosynthetic protein FliP
[truncated: 7,850 more rows]
