# Supplementary material for: Bacterial chemolithoautotrophy via manganese oxidation
Source: Springer Nature journal article supplement (doi:10.1038/s41586-020-2468-5), 2020-07-15
Supplement: MOESM6 [file 41586_2020_2468_MOESM6_ESM.xlsx]

## Sheet: Sheet1
Supplementary Table 4 | Key genomic features and their expression in Species A.
							Expression (Transcript per million; TPM)- Sample (% Mn(II) oxidized)
	IMG locus tag	IMG gene ID	Complex name	Operon name	Gene name	Gene product name	Mn12 (18% Mn(II) oxidized)	Mn09 (19% Mn(II) oxidized)	Mn10 (45% Mn(II) oxidized)	Mn11 (61% Mn(II) oxidized)	Mn08 (66% Mn(II) oxidized)	Mn06 (73% Mn(II) oxidized)	Mn03 (77% Mn(II) oxidized)	Mean	Percentile (Species A only)
Carbon Metabolism (genes ordered by function)
Carbon Update
	Ga0306812_101370	2784401941			cah	carbonic anhydrase	642.992	1009.48	1502.68	1105.75	1330.44	1677.45	1534.72	911.692	0.970363
	Ga0306812_102454	2784403877			cam	carbonic anhydrase	165.729	208.137	166.851	217.256	155.489	210.624	116.965	138.938	0.65513
	Ga0306812_11144	2784406389			cam	carbonic anhydrase	781.029	719.528	1440.28	1373.82	1589.62	1423.14	1328.31	922.001	0.971399
TCA Cycle
	Ga0306812_103302	2784404811			aclA	ATP citrate lyase, alpha subunit	460.929	595.461	700.76	567.408	620.723	551.003	476.653	422.931	0.912746
	Ga0306812_103303	2784404812			aclB	ATP-citrate lyase, beta subunit	554.975	728.053	899.035	784.508	998.594	813.491	750.096	577.913	0.944663
	Ga0306812_1011250	2784402821			mdh	Malate dehydrogenase	396.217	453.905	446.574	449.207	316.335	323.486	164.012	265.51	0.837098
	Ga0306812_10154	2784401625			fumC	fumarate hydratase (fumarase C),aerobic Class II	103.819	172.157	209.197	174.533	179.425	180.01	149.118	128.353	0.629637
	Ga0306812_103307	2784404816			sdhA	Succinate dehydrogenase or fumarate reductase, flavoprotein subunit	127.044	162.015	209.202	150.321	190.468	174.964	136.084	124.731	0.620725
	Ga0306812_101527	2784402098			sdhA	Succinate dehydrogenase or fumarate reductase, flavoprotein subunit	156.382	157.821	160.089	148.585	149.893	138.895	111.613	117.464	0.60228
	Ga0306812_1011483	2784403054			sdhA or nadB	Succinate dehydrogenase/fumarate reductase, flavoprotein subunit or L-aspartate oxidase	373.289	347.749	381.874	417.415	388.922	313.976	450.279	268.963	0.838964
	Ga0306812_101266	2784401837			sdhB	Succinate dehydrogenase and fumarate reductase iron-sulfur protein	426.449	312.327	329.457	273.458	151.453	184.918	124.169	200.306	0.767876
	Ga0306812_101267	2784401838			sdhE	Succinate dehydrogenase cytochrome B subunit, b558 family	228.179	152.399	152.252	143.193	74.6133	116.01	77.1745	109.395	0.576995
	Ga0306812_103308	2784404817			sucC	succinyl-CoA synthetase, beta subunit	197.772	220.719	256.79	181.825	236.981	208.255	151.63	155.018	0.69057
	Ga0306812_103309	2784404818			sucD	succinyl-CoA synthetase alpha chain	226.434	243.246	301.749	240.696	300.896	218.119	202.279	171.306	0.722694
	Ga0306812_10687	2784405970			forD	2-oxoglutarate:ferredoxin oxidoredutase delta subunit	1535.24	1444.6	1513.48	1130.06	900.493	928.829	567.062	1145.68	0.97886
	Ga0306812_10688	2784405971			forA	2-oxoglutarate:ferredoxin oxidoredutase alpha subunit	1683.3	1609.66	1779.88	1476.95	1252.01	1444.42	739.961	1426.6	0.984041
	Ga0306812_10689	2784405972			forB	2-oxoglutarate:ferredoxin oxidoredutase beta subunit	1552.87	1577.48	1737.4	1514.41	1575.83	1565.98	922.759	1492.39	0.985285
	Ga0306812_10690	2784405973			forC	2-oxoglutarate:ferredoxin oxidoredutase gamma subunit	1355.31	1315.42	1197.48	921.346	979.556	871.215	427.26	1009.65	0.974508
	Ga0306812_10691	2784405974			forE	2-oxoglutarate:ferredoxin oxidoreductase epsilon subunit	1958.08	1335.44	1820.32	2013.56	1512.77	888.276	818.133	1478.08	0.985078
	Ga0306812_103275	2784404784			icd	Isocitrate dehydrogenase	1160.65	1423.61	1612.71	1607.33	1337.36	1061.4	1384.72	1025.95	0.975544
	Ga0306812_103304	2784404813			acnA	Aconitate hydratase	885.551	1008.64	1213.33	1152.85	1200.25	1005.58	1085.9	803.563	0.96456
	Ga0306812_101847	2784402418			porD	Pyruvate:ferredoxin oxidoreductase delta subunit	922.899	870.422	897.497	948.854	547.912	763.234	439.143	582.915	0.945492
	Ga0306812_101848	2784402419			porA	Pyruvate:ferredoxin oxidoreductase alpha subunit	1219.01	1353.65	1553.64	1624.41	1633.34	1868.88	861.451	1121.54	0.978031
	Ga0306812_101849	2784402420			porB	Pyruvate:ferredoxin oxidoreductase beta subunit	1461.03	1815.54	2171.15	1842.8	2388.56	2299.64	1260.2	1472.72	0.98487
	Ga0306812_101850	2784402421			porC	Pyruvate:ferredoxin oxidoreductase gamma subunit	1245.14	1448.57	1538.41	1375.81	1934.28	1754.48	806.611	1077.39	0.976788
	Ga0306812_101851	2784402422			porE	Pyruvate:ferredoxin oxidoreductase epsilon subunit	0	0	0	0	0	0	0	612.465	0.948187
	Ga0306812_1021062	2784404484			gltA	Citrate synthase	95.3156	85.5077	131.798	117.242	102.714	110.601	82.214	88.5702	0.510881
	Ga0306812_103186	2784404695			gltA	Citrate synthase	529.399	400.627	430.613	685.101	345.129	373.265	331.36	343.604	0.881658
	Ga0306812_10222	2784403445			pycB	Pyruvate carboxylase, subunit B	132.796	113.078	112.367	77.0116	95.3263	113.143	75.3255	87.8321	0.507565
	Ga0306812_10223	2784403446			pycA	Pyruvate carboxylase, subunit A	146.634	165.581	199.982	167.316	158.895	157.177	181.676	124.756	0.62114
	Ga0306812_10158	2784401629			pdhD	Pyruvate and 2-oxoglutarate dehydrogenase E3 component, Dihydrolipoyl dehydrogenase	401.81	308.218	305.476	444.88	272.934	247.483	238.347	238.758	0.81285
	Ga0306812_10159	2784401630			pdhC	Pyruvate dehydrogenase complex E2 component, dihydrolipoamide acetyltransferase	504.599	276.547	355.025	471.331	261.474	209.275	237.293	235.655	0.810984
	Ga0306812_10160	2784401631			pdhB	Pyruvate dehydrogenase complex E1 component, beta subunit (Transketolase)	306.671	235.417	245.901	312.664	175.167	170.688	115.23	181.529	0.740518
	Ga0306812_10161	2784401632			pdhA	Pyruvate dehydrogenase complex E1 component subunit alpha	363.219	280.52	323.297	456.808	250.85	211.451	189.758	238.719	0.812642
	Ga0306812_105267	2784405838			pdhC	Pyruvate dehydrogenase complex E2 component, dihydrolipoamide acetyltransferase	760.438	596.881	111.136	126.288	60.1099	55.4251	106.147	194.746	0.760415
	Ga0306812_105268	2784405839			pdhB	Pyruvate dehydrogenase E1 component subunit beta	804.313	751.878	151.58	153.774	108.549	54.2928	154.062	220.308	0.795648
	Ga0306812_105269	2784405840			pdhA	Pyruvate dehydrogenase E1 component subunit alpha	568.42	398.851	88.3896	80.4555	388.346	26.4128	380.148	214.915	0.786736
	Ga0306812_102629	2784404052			pdhD	Pyruvate and 2-oxoglutarate dehydrogenase E3 component, Dihydrolipoyl dehydrogenase	156.674	136.479	128.508	91.4447	91.4019	79.0456	68.9133	91.5536	0.521036
	Ga0306812_102803	2784404226			pdhA	Pyruvate dehydrogenase E1 component, alpha subunit	270.567	206.388	209.653	558.29	240.403	219.965	299.148	194.053	0.759585
	Ga0306812_102804	2784404227			pdhB	Pyruvate dehydrogenase E1 component, beta subunit	467.309	307.936	297.593	681.745	295.678	261.305	315.06	289.651	0.854922
	Ga0306812_102805	2784404228			pdhC	Pyruvate dehydrogenase E2 component (dihydrolipoamide acetyltransferase)	299.864	239.056	223.599	733.058	349.133	303.13	517.864	290.463	0.855337
	Ga0306812_1021045	2784404467			pdhC	Pyruvate dehydrogenase E2 component (dihydrolipoamide acetyltransferase)	131.549	106.014	150.036	162.306	110.174	93.1463	100.175	90.4506	0.518135
	Ga0306812_1021046	2784404468			pdhB	Pyruvate dehydrogenase E1 component, beta subunit	252.376	192.222	252.247	332.145	226.098	196.467	247.589	180.829	0.739482
	Ga0306812_1021047	2784404469			pdhA	Pyruvate dehydrogenase E1 component, alpha subunit	331.757	234.337	279.665	376.383	270.286	256.782	291.112	226.309	0.803731
	Ga0306812_1011184	2784402755			pdhD	Pyruvate and 2-oxoglutarate dehydrogenase E3 component, Dihydrolipoyl dehydrogenase	22.9206	19.5365	25.4283	28.8097	28.0371	29.3845	29.3322	20.3377	0.179896
	Ga0306812_105169	2784405740			pdhA	Pyruvate dehydrogenase E1 component, alpha subunit	46.9952	54.1831	162.008	31.1054	101.053	101.254	43.028	57.4975	0.382383
	Ga0306812_105170	2784405741			pdhB	Pyruvate dehydrogenase E1 component, beta subunit	78.073	55.2829	214.899	54.8288	146.103	161.757	97.6498	85.7977	0.500933
	Ga0306812_1037	2784404516			ppc	phosphoenolpyruvate carboxylase	499.175	485.231	324.333	266.763	232.034	241.605	268.123	257.395	0.829637
Glycolysis
	Ga0306812_1011780	2784403351			ppsA	phosphoenolpyruvate synthase	760.961	398.482	289.044	413.63	1925.36	71.5276	2161.2	687.249	0.955233
	Ga0306812_102219	2784403642			ppdK	pyruvate phosphate dikinase	251.312	296.643	382.512	393.351	425.356	387.088	287.033	266.583	0.838135
	Ga0306812_10325	2784404534			pykA	pyruvate kinase	138.302	144.876	159.155	192.607	150.827	167.748	144.354	111.514	0.584041
	Ga0306812_103460	2784404969			pykA	pyruvate kinase	109.672	80.6617	118.261	97.4846	116.596	138.35	114.914	91.0435	0.519585
	Ga0306812_103241	2784404750			eno	enolase	117.23	129.412	124.554	101.929	101.754	122.156	55.1344	90.7642	0.518964
	Ga0306812_11139	2784406384			gpmA	2,3-bisphosphoglycerate-dependent phosphoglycerate mutase	85.1845	128.905	158.175	179	143.211	115.45	57.8303	97.0934	0.538653
	Ga0306812_101580	2784402151			gpmI	phosphoglycerate mutase	351.238	332.891	393.848	404.804	359.516	345.76	274.687	278.584	0.846425
	Ga0306812_10662	2784405945			gpmI	phosphoglycerate mutase	165.848	203.143	250.141	232.195	219.229	212.564	124.306	154.222	0.689119
	Ga0306812_101304	2784401875			pgk	phosphoglycerate kinase	399.107	352.079	456.396	566.391	445.708	499.375	387.802	345.192	0.882694
	Ga0306812_101303	2784401874			gapA	glyceraldehyde 3-phosphate dehydrogenase	258.872	281.028	297.023	405.376	264.825	300.122	261.288	219.385	0.793782
	Ga0306812_102818	2784404241			gapA	glyceraldehyde 3-phosphate dehydrogenase	308.116	175.468	249.354	788.81	239.205	259.065	361.925	256.04	0.82715
	Ga0306812_103717	2784405225			gap2	glyceraldehyde 3-phosphate dehydrogenase (NAD(P)+)	261.476	240.333	140.564	179.821	116.51	88.4651	130.826	114.124	0.593161
	Ga0306812_101305	2784401876			tpiA	triosephosphate isomerase	398.297	295.21	390.173	463.678	396.82	351.784	437.661	311.255	0.866943
	Ga0306812_103686	2784405195			fbp	fructose-1,6-bisphosphatase I	95.927	110.15	176.893	183.921	140.905	160.842	145.172	112.6	0.588187
	Ga0306812_1011183	2784402754			fbp	fructose-1,6-bisphosphatase I	7.96778	11.8111	14.0459	15.3604	15.2743	11.0123	11.8546	11.3371	0.117513
	Ga0306812_10313	2784404522			pfkA	6-phosphofructokinase 1	155.304	157.667	186.431	201.065	150.652	163.826	149.688	135.847	0.646839
	Ga0306812_1044	2784405240			pfkA	6-phosphofructokinase 1	515.126	381.1	312.131	526.181	324.556	238.191	275.465	290.964	0.855959
	Ga0306812_1011466	2784403037			pgi	glucose-6-phosphate isomerase	64.6413	110.461	153.075	136.455	149.16	100.958	90.5701	85.9574	0.501347
	Ga0306812_1011182	2784402753			gck	glucokinase	2.87967	13.3397	12.5894	21.6508	12.8808	10.2931	13.2128	10.2334	0.10943
	Ga0306812_10164	2784401635			gck	glucokinase	407.911	326.262	322.189	523.592	343.433	287.201	261.879	255.727	0.826943
	Ga0306812_10163	2784401634			pgm	phosphoglucomutase	597.143	463.869	521.833	1009.7	491.838	416.669	474.887	426.776	0.914819
Other Carbon Metabolism
	Ga0306812_101378	2784401949			acs	acetyl-coenzyme A synthetase	394.721	417.516	519.66	594.207	520.947	601.253	533.551	387.337	0.901969
	Ga0306812_103504	2784405013			acs	acetyl-coenzyme A synthetase	81.0099	74.9466	89.8461	95.9791	61.8015	74.5828	76.4349	65.2797	0.419275
	Ga0306812_105270	2784405841			acs	acetyl-coenzyme A synthetase	1339.03	880.057	628.855	685.361	2401.15	196.083	2356.92	997.765	0.973886
	Ga0306812_1011721	2784403292			adh	alcohol dehydrogenase	43.513	42.6478	35.8501	267.152	103.902	99.7866	107.081	79.5575	0.473782
	Ga0306812_103410	2784404919			adh	alcohol dehydrogenase	192.394	111.599	107.351	141.587	106.65	103.054	111.314	91.8778	0.522694
	Ga0306812_102600	2784404023			coxM	carbon-monoxide dehydrogenase medium subunit	242.422	342.031	1173.62	1819.04	1805.78	815.263	2617.33	886.058	0.969119
	Ga0306812_102601	2784404024			coxS	carbon-monoxide dehydrogenase small subunit	248.239	242.093	859.548	1323.85	1426.43	662.21	1374.71	624.083	0.948601
	Ga0306812_102602	2784404025			coxL	carbon-monoxide dehydrogenase large subunit	162.817	164.744	540.951	844.2	949.888	379.001	1131.72	473.523	0.925389
Nitrogen Metabolism (genes ordered by function)
	Ga0306812_101593	2784402164			nrtAC	ABC-type nitrate/sulfonate/bicarbonate transport system, periplasmic component	657.678	945.095	1160.92	2021.56	2163.13	1809.97	2022.73	1089.6	0.976995
	Ga0306812_101594	2784402165			nrtB	Nitrate ABC transporter permease	499.349	715.329	991.73	1389.61	2309.35	1430.24	1559.8	917.946	0.971192
	Ga0306812_101595	2784402166			nrtD	Nitrate transport ATP-binding subunits C and D	510.348	843.41	1376.36	1741.05	3178.24	1609.31	2536.1	1180.06	0.979689
	Ga0306812_101596	2784402167			nrtAC	ABC-type nitrate/sulfonate/bicarbonate transport system, periplasmic component	264.239	806.115	1219.82	1584.94	2434.86	1663.8	2921.28	1223.05	0.980104
	Ga0306812_102793	2784404216			yfdC	formate-nitrite transporter family protein	5.55148	11.3153	14.4838	46.0732	30.6597	19.8432	27.5513	18.8318	0.169948
	Ga0306812_101412	2784401983			nirB	nitrite reductase (NADH) large subunit	199.588	358.494	565.579	867.445	1104.69	658.06	1105.12	547.384	0.940104
	Ga0306812_101602	2784402173			nirD	nitrite reductase (NADH) small subunit	42.7523	0	6.02922	2.47256	3.90268	0	0	168.775	0.717513
	Ga0306812_103505	2784405014			nirD	nitrite reductase (NADH) small subunit	137.255	98.9048	110.763	76.2937	95.3628	91.0341	44.9834	63.1655	0.408705
	Ga0306812_1011527	2784403098			nirK	nitrite reductase (NO-forming)	285.587	180.05	258.107	334.566	112.228	91.3742	110.665	153.242	0.687254
	Ga0306812_1011764	2784403335			nirK	nitrite reductase (NO-forming)	68.4712	108.371	115.875	92.73	97.1424	109.421	80.9462	74.951	0.457202
	Ga0306812_101184	2784401755			amt	ammonium transporter	238.594	312.557	507.983	416.109	641.758	491.072	449.548	301.314	0.861554
	Ga0306812_101188	2784401759			amt	ammonium transporter	939.263	1243.64	1285.47	1218.64	2645.92	1956.74	1388.05	1171.23	0.979482
	Ga0306812_103342	2784404851			glnA	glutamine synthetase	1744.96	1836.52	2125.47	2182.39	2490.36	1356.01	1908.14	1472.3	0.984663
	Ga0306812_103549	2784405058			glnA	glutamine synthetase	91.0438	80.5459	130.158	128.849	111.465	104.519	114.283	83.6595	0.492435
	Ga0306812_101945	2784402516			gdhA	glutamate dehydrogenase	352.537	278.542	260.457	242.49	201.045	210.891	172.722	190.711	0.754611
	Ga0306812_103535	2784405044			gdhA	glutamate dehydrogenase	211.918	186.612	243.558	186.363	172.66	174.645	128.46	146.779	0.673575
	Ga0306812_10524	2784405595			gltD	glutamate synthase (NADPH) small chain	251.787	269.369	311.9	357.555	341.041	291.887	318.025	232.959	0.808912
	Ga0306812_10525	2784405596			gltB	glutamate synthase (NADPH) large chain	230.844	247.176	277.589	320.825	271.091	281.346	308.564	214.511	0.785907
	Ga0306812_101597	2784402168			cynS	cyanate lyase	544.243	1195.51	1833.4	2770.91	3001.73	2310.56	2591.96	1499.06	0.985492
	Ga0306812_101536	2784402107			ureD	Urease accessory protein UreD	210.628	366.512	411.268	415.946	614.926	512.498	536.825	326.856	0.87544
	Ga0306812_101537	2784402108			urtA	putative branched-chain amino acid transport protein (ABC superfamily, peri_bind)	326.468	1093.78	1494.21	969.164	2658.17	1423.78	1591.08	1010.3	0.974715
	Ga0306812_101538	2784402109			urtB	Urea ABC transporter permease	73.3366	236.652	270.952	147.568	454.727	357.294	262.421	200.324	0.768083
	Ga0306812_101539	2784402110			urtC	conserved membrane protein of unknown function	34.1406	117.56	163.781	108.927	235.819	168.445	139.669	108.04	0.57285
	Ga0306812_10154	2784401625			urtD	Urea ABC transporter ATP-binding protein	103.819	172.157	209.197	174.533	179.425	180.01	149.118	128.353	0.629637
	Ga0306812_101540	2784402111			urtE	Urea ABC transporter ATP-binding protein	64.9572	237.215	356.886	199.735	461.032	319.638	317.474	190.404	0.754197
	Ga0306812_101541	2784402112			ureA	Urease subunit gamma	0	0	3.0671	10.0624	3.97063	0	0	47.33	0.335751
	Ga0306812_101542	2784402113			ureB	Urease subunit beta	0	62.7959	99.5698	65.3331	97.9654	79.7472	31.734	113.709	0.592332
	Ga0306812_101543	2784402114			ureC	Urease subunit alpha	32.3364	148.921	218.134	142.288	356.928	266.997	302.669	155.744	0.692228
	Ga0306812_101544	2784402115			ureF	Urease accessory protein UreF	36.6036	74.1228	82.2247	49.2948	146.544	122.612	52.8819	63.979	0.414508
	Ga0306812_101545	2784402116			ureG	Urease accessory protein UreG	43.3048	181.046	329.404	246.695	656.711	456.239	483.393	256.908	0.828601
Energy Metabolism
Complex I (genes ordered by operon)
	Ga0306812_101369	2784401940			nuoF	NADH dehydrogenase subunit F	594.076	592.913	704.665	709.809	554.716	654.359	459.281	609.974	0.947979
	Ga0306812_1011253	2784402824			nuoF	NADH dehydrogenase subunit F	812.526	928.025	904.29	788.296	478.05	408.847	276.096	656.59	0.952124
	Ga0306812_1011557	2784403128		Complex_I_3	nuoN	NADH-quinone oxidoreductase, membrane subunit N	103.099	132.352	190.613	162.827	151.234	129.235	108.625	139.712	0.656373
	Ga0306812_1011558	2784403129		Complex_I_3	nuoM	NADH-quinone oxidoreductase, membrane subunit M	178.462	213.33	309.218	255.98	233.585	194.144	169.868	222.084	0.798342
	Ga0306812_1011559	2784403130		Complex_I_3	nuoM	NADH-quinone oxidoreductase, membrane subunit M	201.556	236.685	346.97	310.521	284.394	218.066	228.026	260.888	0.831917
	Ga0306812_1011560	2784403131		Complex_I_3	mrpD-like	multicomponent Na+:H+ antiporter subunit D	362.018	363.192	509.009	420.759	408.773	384.197	351.848	399.971	0.905699
	Ga0306812_1011561	2784403132		Complex_I_3		membrane hypothetical protein	193.434	181.906	274.683	259.847	198.042	179.095	136.673	203.383	0.77285
	Ga0306812_1011562	2784403133		Complex_I_3	mrpD-like	multicomponent Na+:H+ antiporter subunit D	165.21	185.624	256.443	236.015	189.105	159.726	171.995	194.874	0.761036
	Ga0306812_1011563	2784403134		Complex_I_3	nuoK	NADH-quinone oxidoreductase, membrane subunit K	436.239	303.36	395.584	274.864	162.766	216.407	177.824	281.006	0.84829
	Ga0306812_1011564	2784403135		Complex_I_3	nuoJ	NADH-quinone oxidoreductase, membrane subunit J	258.966	276.059	338.657	300.173	223.424	233.044	252.501	268.975	0.839171
	Ga0306812_1011565	2784403136		Complex_I_3	nuoI	NADH-quinone oxidoreductase, subunit I	191.142	221.015	303.17	305.803	215.749	142.844	171.306	221.575	0.79772
	Ga0306812_1011566	2784403137		Complex_I_3	nuoG-like	NADH-quinone oxidoreductase subunit G like protein	344.3	382.999	539.007	524.399	465.478	366.738	500.107	446.147	0.919585
	Ga0306812_1011567	2784403138		Complex_I_3	nuoD	NADH-quinone oxidoreductase, subunit D	292.867	257.632	356.975	372.42	287.933	230.847	282.033	297.244	0.859067
	Ga0306812_1011568	2784403139		Complex_I_3	nuoC	NADH-quinone oxidoreductase, subunit C	248.068	200.961	254.643	220.752	178.197	128.189	99.2562	190.009	0.752332
	Ga0306812_1011569	2784403140		Complex_I_3	nuoB	NADH-quinone oxidoreductase, subunit B	383.396	412.157	562.772	656.355	496.891	384.236	445.677	477.355	0.92601
	Ga0306812_1011570	2784403141		Complex_I_3	nuoA	NADH-quinone oxidoreductase, membrane subunit A	371.59	319.049	338.547	363.952	211.511	277.957	156.469	291.296	0.856373
	Ga0306812_102298	2784403721		Complex_I_2	nuoA	NADH-quinone oxidoreductase, membrane subunit A	188.374	107.613	103.774	594.377	204.174	155.176	183.38	219.553	0.794197
	Ga0306812_102299	2784403722		Complex_I_2	nuoB	NADH-quinone oxidoreductase, subunit B	163.451	173.298	143.784	946.385	339.274	245.762	376.82	341.253	0.880622
	Ga0306812_102300	2784403723		Complex_I_2	nuoCD	NADH-quinone oxidoreductase, subunits C and D	109.396	73.3414	77.5308	400.814	151.916	114.666	200.167	161.119	0.701762
	Ga0306812_102301	2784403724		Complex_I_2	nuoE	NADH-quinone oxidoreductase, subunit E	95.9578	59.0352	49.8753	414.067	178.559	129.048	150.309	153.836	0.68829
	Ga0306812_102302	2784403725		Complex_I_2	nuoF	NADH-quinone oxidoreductase, subunit F	145.144	86.4117	85.3832	426.826	153.4	124.256	201.034	174.636	0.729534
	Ga0306812_102303	2784403726		Complex_I_2	nuoG	NADH-quinone oxidoreductase, subunit G	103.479	52.2942	52.1137	299.927	108.287	80.6165	153.658	121.482	0.613886
	Ga0306812_102304	2784403727		Complex_I_2	nuoH	NADH-quinone oxidoreductase, membrane subunit H	107.851	57.9609	56.9334	188.739	61.841	42.2508	60.4895	82.2951	0.48601
	Ga0306812_102305	2784403728		Complex_I_2	nuoI	NADH-quinone oxidoreductase, subunit I	171.469	83.3671	85.9668	340.346	121.514	92.2149	135.563	147.206	0.674611
	Ga0306812_102306	2784403729		Complex_I_2	nuoJ	NADH-quinone oxidoreductase, membrane subunit J	107.789	101.23	80.8682	308.03	98.2456	88.7813	86.1238	124.438	0.620311
	Ga0306812_102307	2784403730		Complex_I_2	nuoK	NADH-quinone oxidoreductase, membrane subunit K	180.454	111.019	91.8818	466.852	153.579	145.414	150.037	185.605	0.745492
	Ga0306812_102308	2784403731		Complex_I_2	nuoL	NADH-quinone oxidoreductase, membrane subunit L	168.807	110.572	120.28	508.16	159.827	116.008	207.727	198.769	0.766425
	Ga0306812_102309	2784403732		Complex_I_2	nuoM	NADH-quinone oxidoreductase, membrane subunit M	112.847	98.3458	81.4774	504.388	168.315	114.631	170.214	178.603	0.736373
	Ga0306812_102310	2784403733		Complex_I_2	nuoN	NADH-quinone oxidoreductase, membrane subunit N	71.8893	44.9821	38.9998	188.473	71.0985	57.0904	93.9438	80.9253	0.481244
	Ga0306812_10472	2784405308		Complex_I_1	nuoA	NADH-quinone oxidoreductase, membrane subunit A	327.783	368.549	298.749	233.21	150.488	331.1	61.0314	252.987	0.825492
	Ga0306812_10473	2784405309		Complex_I_1	nuoB	NADH-quinone oxidoreductase, subunit B	284.216	308.899	316.172	291.288	212.132	290.156	109.206	258.867	0.830881
	Ga0306812_10474	2784405310		Complex_I_1	nuoC	NADH-quinone oxidoreductase, subunit C	183.459	217.972	226.313	219.102	144.209	181.353	91.4707	180.554	0.739067
	Ga0306812_10475	2784405311		Complex_I_1	nuoD	NADH-quinone oxidoreductase, subunit D	289.243	250.643	286.832	243.133	217.513	260.462	182.29	247.159	0.821347
	Ga0306812_10476	2784405312		Complex_I_1	nuoE	NADH-quinone oxidoreductase, subunit E	210.131	209.81	256.844	210.185	191.63	228.546	119.597	203.82	0.773472
	Ga0306812_10477	2784405313		Complex_I_1	nuoF	NADH-quinone oxidoreductase, subunit F	397.027	395.794	477.167	377.814	421.959	299.278	274.5	377.648	0.896788
	Ga0306812_10478	2784405314		Complex_I_1	nuoG	NADH-quinone oxidoreductase, subunit G	286.525	322.513	356.346	283.035	290.393	272.838	225.095	290.964	0.855751
	Ga0306812_10479	2784405315		Complex_I_1	nuoH	NADH-quinone oxidoreductase, membrane subunit H	222.001	240.64	256.245	213.558	221.545	274.514	133.216	223.103	0.799378
	Ga0306812_10480	2784405316		Complex_I_1	nuoI	NADH-quinone oxidoreductase, subunit I	365.291	320.754	382.569	308.572	275.669	284.864	172.284	301.429	0.861762
	Ga0306812_10481	2784405317		Complex_I_1	nuoJ	NADH-quinone oxidoreductase, membrane subunit J	122.522	146.105	139.311	107.841	94.4597	141.727	46.557	114.075	0.592746
	Ga0306812_10482	2784405318		Complex_I_1	nuoK	NADH-quinone oxidoreductase, membrane subunit K	229.6	174.886	159.186	108.088	81.3832	122.983	22.9964	128.446	0.630052
	Ga0306812_10483	2784405319		Complex_I_1	nuoL	NADH-quinone oxidoreductase, membrane subunit L	222.356	216.097	243.568	173.951	195.27	237.362	128.314	202.417	0.770984
	Ga0306812_10484	2784405320		Complex_I_1	nuoM	NADH-quinone oxidoreductase, membrane subunit M	167.172	161.009	155.642	119.675	132.831	182.865	74.9245	142.017	0.662383
	Ga0306812_10485	2784405321		Complex_I_1	nuoN	NADH-quinone oxidoreductase, membrane subunit N	123.665	126.252	135.506	98.0713	113.919	145.674	59.1275	114.602	0.594819
Periplasmic electron shuttles (no particular order)
	Ga0306812_101173	2784401744				plastocyanin	96.0743	51.6564	52.7205	85.4272	36.2561	35.8578	29.2547	55.321	0.369948
	Ga0306812_103635	2784405144				plastocyanin	137.872	113.557	121.131	190.371	95.547	123.068	101.136	126.097	0.62487
	Ga0306812_101270	2784401841				ferredoxin	3567.26	3270.37	4297.22	4339.04	2852.63	1949.64	2280.87	3222.43	0.996269
	Ga0306812_1018	2784401579				tetraheme cytochrome c	252.998	234.982	311.13	338.29	313.16	372.7	445.352	324.087	0.87399
	Ga0306812_102288	2784403711				triheme cytochrome c	188.666	252.374	266.841	160.995	159.262	192.19	89.4962	187.118	0.747979
	Ga0306812_10111	2784401582				diheme cytochrome c	610.939	478.926	1178.95	1863.64	1101.48	357.321	734.973	903.748	0.970155
	Ga0306812_101502	2784402073				diheme cytochrome c	339.399	213.378	228.709	230.565	187.453	99.694	103.404	200.372	0.76829
	Ga0306812_104246	2784405482	PCC_3			heme b-containing protein potentially involved in periplasmic electron transfer	4.83675	13.603	54.3675	8.62763	24.0869	29.3545	13.574	21.2072	0.186528
	Ga0306812_104264	2784405500				diheme cytochrome c	325.32	109.477	158.248	411.134	161.758	176.095	207.447	221.354	0.797306
	Ga0306812_105285	2784405856				diheme cytochrome c	123.938	128.898	27.936	22.3031	15.3006	11.4986	18.0848	49.7085	0.344663
Complex III (Cytochrome bc1-like) (genes ordered by operon)
	Ga0306812_1011763	2784403334				periplasmic monoheme cytochrome c	115.905	81.494	81.9768	63.5665	78.492	76.1741	53.5484	78.7367	0.470259
	Ga0306812_1011764	2784403335				nitrite reductase (NO-forming)	56.8577	80.8361	96.1437	70.0228	75.2454	85.403	60.1485	74.951	0.457202
	Ga0306812_1011765	2784403336		Complex_III_2		quinol-cytochrome c reductase, fused cytochrome b/c subunit	92.0718	70.1312	44.7906	36.7073	33.6604	40.3852	28.5602	49.4724	0.343212
	Ga0306812_1011766	2784403337		Complex_III_2		quinol-cytochrome c reductase iron-sulfur subunit	249.653	182.262	85.567	68.4971	56.7515	56.4741	53.0798	107.469	0.571813
	Ga0306812_10241	2784403464		Complex_III_1		quinol-cytochrome c reductase cytochrome b subunit	184.561	181.075	213.643	173.958	169.328	211.826	124.69	179.869	0.738446
	Ga0306812_10242	2784403465		Complex_III_1		quinol-cytochrome c reductase iron-sulfur subunit	649.395	479.04	462.607	591.73	391.155	333.131	249.961	451.003	0.920622
Terminal oxidase (genes ordered by operon)
	Ga0306812_102729	2784404152	Terminal_Oxidase_1 (TO_1)			cytochrome b subunit of the CISM protein family fused with diheme c and putative membrane attached	1313.37	1744.91	2339.04	2380.21	2370.17	2293.22	1408.9	1978.54	0.99171
	Ga0306812_102730	2784404153	Terminal_Oxidase_1 (TO_1)			membrane monoheme cytochrome c	1015.45	1504	1797.14	1681.05	1765.01	2157.39	627.659	1506.81	0.985699
	Ga0306812_102731	2784404154	Terminal_Oxidase_1 (TO_1)			membrane diheme cytochrome c	1112.95	1588.48	2005.25	1815.05	2003.38	2148.9	871.248	1649.32	0.988601
	Ga0306812_102732	2784404155	Terminal_Oxidase_1 (TO_1)		bd-like_I	cytochrome bd-like oxidase clade I	1256.99	1733.67	2167.39	2487.55	2537.95	2943.43	1091.12	2031.16	0.992332
	Ga0306812_102733	2784404156	Terminal_Oxidase_1 (TO_1)			membrane hypothetical protein	470.957	723.371	810.497	972.461	518.344	831.34	162.128	641.3	0.950259
	Ga0306812_102272	2784403695	Terminal_Oxidase_2 (TO_2)			tetraheme cytochrome c	409.536	424.244	499.959	327.252	366.627	377.971	290.298	385.127	0.901554
	Ga0306812_102273	2784403696	Terminal_Oxidase_2 (TO_2)			membrane hypothetical protein	304.375	282.102	195.031	119.069	136.177	117.362	23.8728	168.284	0.716891
	Ga0306812_102274	2784403697	Terminal_Oxidase_2 (TO_2)	Complex_III_4		membrane cytochrome b c-terminus/petD	408.371	465.198	441.417	258.594	298.377	373.682	148.137	341.968	0.881036
	Ga0306812_102275	2784403698	Terminal_Oxidase_2 (TO_2)	Complex_III_4		membrane cytochrome b n-terminus/petB	437.059	513.151	427.002	232.709	350.414	342.773	131.226	347.762	0.885181
	Ga0306812_102276	2784403699	Terminal_Oxidase_2 (TO_2)	Complex_III_4		membrane protein with 2Fe-2S domain	691.701	759.769	739.007	496.6	554.309	555.786	389.294	598.066	0.946736
	Ga0306812_102277	2784403700	Terminal_Oxidase_2 (TO_2)			hypothetical protein	338.771	334.786	343.522	267.084	203.903	189.356	128.794	258.031	0.829845
	Ga0306812_102278	2784403701	Terminal_Oxidase_2 (TO_2)			hypothetical protein	124.337	255.711	304.153	231.849	159.534	150.922	114.671	191.597	0.756269
	Ga0306812_102279	2784403702	Terminal_Oxidase_2 (TO_2)			diheme cytochrome c	117.517	188.862	241.297	150.502	203.417	188.796	96.5807	169.567	0.719585
	Ga0306812_102280	2784403703	Terminal_Oxidase_2 (TO_2)			cytochrome b subunit of the CISM protein family fused with diheme c and putative membrane attached	158.475	241.835	285.49	173.853	216.624	236.028	150.839	209.02	0.779689
	Ga0306812_102281	2784403704	Terminal_Oxidase_2 (TO_2)			monoheme cytochrome c	86.4595	138.011	174.067	101.197	127.938	142.705	56.6575	118.148	0.603938
	Ga0306812_102282	2784403705	Terminal_Oxidase_2 (TO_2)			monoheme cytochrome c	172.934	204.212	211.117	121.824	136.78	183.335	64.772	156.425	0.693886
	Ga0306812_102283	2784403706	Terminal_Oxidase_2 (TO_2)		bd-like_IIIb	cytochrome bd-like oxidase clade IIIb fused with monoheme c	209.388	281.381	325.866	215.807	305.441	341.096	166.73	263.673	0.834819
	Ga0306812_102284	2784403707	Terminal_Oxidase_2 (TO_2)			membrane hypothetical protein	223.911	278.789	334.38	249.457	226.841	270.67	120.09	243.448	0.817824
	Ga0306812_102285	2784403708	Terminal_Oxidase_2 (TO_2)			sodium/proton antiporter mrpD-like	181.571	245.515	292.182	169.539	238.618	278.189	110.084	216.528	0.790259
	Ga0306812_102286	2784403709	Terminal_Oxidase_2 (TO_2)			sodium/proton antiporter mrpD-like	173.116	194.533	202.865	147.066	148.696	207.621	101.778	167.953	0.715648
	Ga0306812_102287	2784403710	Terminal_Oxidase_2 (TO_2)			monoheme cytochrome c	396.884	411.416	412.114	249.45	222.665	217.385	88.6605	285.51	0.852642
	Ga0306812_102288	2784403711	Terminal_Oxidase_2 (TO_2)			triheme cytochrome c	188.666	252.374	266.841	160.995	159.262	192.19	89.4962	187.118	0.747979
	Ga0306812_101365	2784401936			bd-like_II_1	cytochrome bd-like oxidase clade II	74.3421	77.011	86.9852	79.1691	66.2876	85.9512	51.664	74.4872	0.455751
	Ga0306812_103136	2784404645			bd-like_II_2	cytochrome bd-like oxidase clade II	27.9281	20.7194	26.7912	30.9961	22.6669	26.314	13.1716	24.0839	0.203938
	Ga0306812_1011684	2784403255	Terminal_Oxidase_4 (TO_4)	Alt_Complex_III	actA	membrane pentaheme cytochrome c	77.184	58.7912	51.3035	196.278	81.074	53.4846	64.7319	83.2638	0.490363
	Ga0306812_1011685	2784403256	Terminal_Oxidase_4 (TO_4)	Alt_Complex_III	actB1	catalytic subunit of the CISM protein family	107.174	81.5717	70.8495	273.318	108.314	80.1228	114.358	119.387	0.607254
	Ga0306812_1011686	2784403257	Terminal_Oxidase_4 (TO_4)	Alt_Complex_III	actB2	iron-sulfur subunit of the CISM protein family	82.1701	60.7482	52.9397	331.321	130.195	84.7547	172.702	130.69	0.635648
	Ga0306812_1011687	2784403258	Terminal_Oxidase_4 (TO_4)	Alt_Complex_III	actC	membrane attachment protein of the CISM protein family	73.8533	59.139	58.1623	259.012	80.0479	57.7252	99.569	98.2155	0.541969
	Ga0306812_1011688	2784403259	Terminal_Oxidase_4 (TO_4)	Alt_Complex_III	actD	membrane protein	108.078	91.3566	58.6487	363.36	130.46	79.9089	126.439	136.893	0.650777
	Ga0306812_1011689	2784403260	Terminal_Oxidase_4 (TO_4)	Alt_Complex_III	actE	membrane monoheme cytochrome c	191.242	120.875	110.782	538.747	184.517	130.49	216.079	213.247	0.784249
	Ga0306812_1011690	2784403261	Terminal_Oxidase_4 (TO_4)		bd-like_Vb_2	cytochrome bd-like oxidase clade Vb	62.0078	33.0393	32.8504	111.748	42.1191	30.0689	40.1615	50.285	0.349016
	Ga0306812_1011691	2784403262	Terminal_Oxidase_4 (TO_4)		bd-like_Va_2	cytochrome bd-like oxidase clade Va	39.4802	31.6625	21.7399	124.217	44.2374	32.929	60.9293	50.7421	0.351088
	Ga0306812_102809	2784404232	Terminal_Oxidase_3 (TO_3)			hypothetical protein with CheY domain	318.491	253.89	332.825	782.042	195.927	141.81	174.708	314.242	0.868394
	Ga0306812_102810	2784404233	Terminal_Oxidase_3 (TO_3)		bd-like_Vb_1	cytochrome bd-like oxidase clade Vb	107.737	97.0268	99.2641	232.39	72.7061	54.1675	62.442	103.676	0.559793
	Ga0306812_102811	2784404234	Terminal_Oxidase_3 (TO_3)	Complex_III_3		Rieske Fe-S protein	397.494	243.651	242.981	811.934	268.712	202.323	288.461	350.794	0.886425
	Ga0306812_102812	2784404235	Terminal_Oxidase_3 (TO_3)	Complex_III_3		quinol-cytochrome c reductase cytochrome b subunit	150.73	79.3595	74.8747	217.378	72.6053	61.5381	75.0049	104.499	0.562073
	Ga0306812_102813	2784404236	Terminal_Oxidase_3 (TO_3)		bd-like_Va_1	cytochrome bd-like oxidase clade Va	79.8691	66.005	71.5832	190.914	63.9048	48.5881	52.31	81.8821	0.484352
	Ga0306812_10354	2784404563	Complex_IV			cbb3-type cytochrome c oxidase (CcoNOP fusion)	14.0926	16.8161	12.2477	52.0601	44.4427	26.111	48.1179	30.5555	0.244145
	Ga0306812_10355	2784404564	Complex_IV			cbb3-type cytochrome c oxidase maturation protein	17.531	32.3562	14.537	50.2917	33.8944	32.6443	33.9006	30.7365	0.245596
ETF protein
	Ga0306812_101975	2784402546				cbb3-type cytochrome c oxidase subunit I/II fusion protein	240.242	177.824	198.435	198.443	143.09	144.426	140.655	177.588	0.734715
	Ga0306812_101976	2784402547				cbb3-type cytochrome oxidase maturation protein	107.08	74.1818	67.0298	69.1513	50.9269	58.2107	33.543	65.7319	0.422176
ATPase (Complex V, genes ordered by operon))
	Ga0306812_10486	2784405322				putative F0F1-ATPase subunit (Ca2+/Mg2+ transporter)	201.631	219.097	245.727	188.595	174.781	255.993	61.0761	192.414	0.75772
	Ga0306812_10487	2784405323				hypothetical protein	102.681	94.045	82.9045	52.1751	58.8924	84.2334	19.2934	70.6036	0.441658
	Ga0306812_10488	2784405324				ATP synthase F0 subcomplex A subunit	117.617	136.559	147.863	144.345	106.991	168.209	86.0658	129.664	0.632746
	Ga0306812_10489	2784405325				F-type H+-transporting ATPase subunit c	667.324	535.941	572.438	514.774	559.156	481.257	344.346	525.034	0.935751
	Ga0306812_10490	2784405326				ATP synthase F0 subcomplex B subunit	153.629	190.07	177.205	116.917	180.362	162.732	55.7832	148.1	0.67544
	Ga0306812_10491	2784405327				ATP synthase F1 subcomplex delta subunit	232.818	177.042	220.104	183.913	210.536	254.231	135.014	201.951	0.77057
	Ga0306812_10492	2784405328				phospho-acceptor domain-containing protein	294.722	222.122	245.651	273.817	191.391	198.493	159.531	226.532	0.803938
	Ga0306812_10493	2784405329				ATP synthase F1 subcomplex alpha subunit	684.707	585.443	762.471	556.239	548.206	763.046	570.801	638.702	0.949845
	Ga0306812_10494	2784405330				ATP synthase F1 subcomplex gamma subunit	445.661	336.849	409.79	275.475	243.001	275.187	159.927	306.556	0.863834
	Ga0306812_10495	2784405331				ATP synthase F1 subcomplex beta subunit	768.743	622.466	789.04	560.427	716.261	660.091	479.766	656.685	0.952332
	Ga0306812_10496	2784405332				four helix bundle protein	1029.09	652.972	486.682	324.852	175.142	187.991	117.833	424.938	0.913575
	Ga0306812_10497	2784405333				ATP synthase F1 subcomplex epsilon subunit	185.166	144.247	182.624	115.154	86.5417	119.866	111.426	135.004	0.644974
Extracellular Electron Transfer (genes ordered by operon)
	Ga0306812_1011756	2784403327				hemerythrin-like domain-containing protein	292.447	198.638	169.576	149.939	807.621	33.1036	634.652	326.568	0.875233
	Ga0306812_1011757	2784403328				potentially involved in carbohydrate binding	99.41	91.9065	29.4591	10.6521	18.4807	7.51518	26.5602	40.5691	0.297409
	Ga0306812_1011758	2784403329				potentially involved in carbohydrate binding	159.124	207.447	36.1637	12.5826	6.68131	10.9133	9.99392	63.2723	0.409326
	Ga0306812_1011759	2784403330			mco	multicopper oxidase	1976.11	2200.54	333.959	132.455	35.2485	40.0119	35.5912	679.131	0.954819
	Ga0306812_101931	2784402502			mco	multicopper oxidase	8.18929	5.50882	7.42203	3.26693	4.95507	8.472	5.41653	6.17581	0.0818653
	Ga0306812_101933	2784402504			mco	multicopper oxidase	721.044	949.985	1195.89	685.884	981.561	1311.81	628.08	924.894	0.971606
	Ga0306812_101934	2784402505				potentially involved in carbohydrate binding	141.952	151.427	175.95	106.015	135.354	170.834	79.3411	137.267	0.651606
	Ga0306812_101935	2784402506				potentially involved in carbohydrate binding	166.32	176.252	213.083	156.829	148.182	226.708	93.5011	168.696	0.717306
	Ga0306812_102905	2784404328				heme peroxidase	142.84	100.902	175.672	162.002	166.528	151.678	176.617	153.748	0.688083
	Ga0306812_1011432	2784403003				potentially involved protein interaction	45.2536	42.4671	57.0947	32.3747	36.6908	43.6434	20.0208	39.6493	0.293472
	Ga0306812_1011433	2784403004				outer membrane protein	52.5521	70.8798	97.7693	70.0268	57.0193	83.7082	48.5265	68.6403	0.43399
	Ga0306812_1011434	2784403005				periplasmic triheme cytochrome c	299.939	397.022	486.615	331.804	319.29	504.461	319.063	379.742	0.898238
	Ga0306812_1011435	2784403006				periplasmic triheme cytochrome c	96.0743	188.745	227.674	127.829	140.058	173.053	46.9084	142.906	0.664249
	Ga0306812_1011436	2784403007	PCC_1			periplasmic pentaheme cytochrome c	127.536	174.486	246.321	164.054	145.892	277.285	118.19	179.109	0.737617
	Ga0306812_1011437	2784403008	PCC_1			NHL-repeat containing protein, potentially interacting with proteins in the OM	79.5737	113.437	164.41	103.251	121.26	188.4	74.9022	120.748	0.611606
	Ga0306812_1011438	2784403009	PCC_1			periplasmic tetraheme cytochrome c	74.017	127.816	200.041	126.055	152.621	259.63	118.786	151.281	0.682902
	Ga0306812_1011439	2784403010	PCC_1			putative chaperon involved in protein folding	29.1721	65.2369	60.0271	41.1283	55.262	84.1644	23.3362	51.1896	0.352332
	Ga0306812_1011440	2784403011	PCC_1			putative outer membrane β-barrel porin	58.9314	76.565	115.38	62.0071	73.632	122.164	55.7218	80.6289	0.479171
	Ga0306812_1011441	2784403012	PCC_1			NHL-repeat containing protein, potentially interacting with proteins in the OM	46.5446	63.8156	77.4057	37.9175	61.9019	87.58	32.7253	58.2701	0.386321
	Ga0306812_1011442	2784403013	PCC_1			extracellular dodecaheme cytochrome c	180.524	218.765	311.132	180.319	249.241	352.972	272.644	252.228	0.825078
	Ga0306812_1011443	2784403014	PCC_1			potentially involved post-translational modification	56.4201	62.0754	56.8924	33.8926	35.4427	55.7004	31.8294	47.4647	0.33658
	Ga0306812_103700	2784405208	PCC_2			potentially involved in signal transduction	12.64	10.3249	33.6018	8.28583	13.6566	12.8965	9.46737	14.4104	0.137824
	Ga0306812_103701	2784405209	PCC_2			copper-binding protein potentially involved in periplasmic electron transfer	28.6635	19.3138	55.7895	12.914	31.4876	25.3692	13.786	26.7605	0.220518
	Ga0306812_103702	2784405210	PCC_2			cytoplasmic membrane protein	31.8859	17.6767	58.9824	13.5314	31.6864	29.349	15.9804	28.4418	0.231088
	Ga0306812_103703	2784405211	PCC_2		pioB-like	outer membrane β-barrel porin	45.1999	40.2145	112.682	64.8333	95.0286	85.1736	78.241	74.4818	0.455544
	Ga0306812_103704	2784405212	PCC_2		pioA-like	decaheme cytochrome c	40.6651	29.0581	114.355	38.2355	221.26	79.99	154.327	96.8416	0.537824
	Ga0306812_103705	2784405213	PCC_2			monoheme cytochrome c	33.1794	16.9133	63.7384	18.3044	120.717	24.4845	24.6773	43.1449	0.312124
	Ga0306812_104244	2784405480	PCC_3		pioB-like	outer membrane β-barrel porin	62.8752	36.239	114.61	41.953	54.7906	73.2147	55.0727	62.6794	0.406839
	Ga0306812_104245	2784405481	PCC_3		pioA-like	periplasmic decaheme cytochrome	29.1155	26.8687	139.382	28.6447	66.6691	98.1686	68.6215	65.3528	0.419689
	Ga0306812_104246	2784405482	PCC_3			heme-containing protein potentially involved in periplasmic electron transfer	4.83675	13.603	54.3675	8.62763	24.0869	29.3545	13.574	21.2072	0.186528
	Ga0306812_104247	2784405483	PCC_3			cytoplasmic membrane protein potentially involved in signaling	8.12201	13.0869	65.7278	11.6002	32.1993	42.6956	25.6397	28.4388	0.230881
	Ga0306812_11056	2784406337			cyc2-like	trans-outer membrane cytochrome c	160.356	159.398	115.275	58.2911	56.0419	174.332	48.1869	110.269	0.580518
	Ga0306812_104234	2784405470					1708.22	701.396	1028.38	997.827	6651.84	188.934	3714.56	2141.59	0.992953
	Ga0306812_104235	2784405471					2269.18	931.586	1882.9	1851.35	9144	914.087	5677.93	3238.72	0.996477
Flagellar Assembly and Motility (contiguous genes)
	Ga0306812_10552	2784405623				flagellar hook-length control protein FliK	1.07297	3.30058	10.2319	2.54534	6.69495	9.8049	5.1393	5.54142	0.0744041
	Ga0306812_10553	2784405624				flagellar basal-body rod modification protein FlgD	5.9373	5.21821	9.64149	3.76681	7.30494	9.00844	3.70934	6.3695	0.0839378
	Ga0306812_10554	2784405625				flagellar hook protein FlgE	13.8128	12.2502	45.7285	15.1712	40.1689	48.3238	24.8801	28.6194	0.232332
	Ga0306812_10555	2784405626				flagellar FliL protein	6.52551	7.45573	27.2808	5.57999	23.5124	42.1914	9.70673	17.4647	0.161036
	Ga0306812_10556	2784405627				flagellar motor switch protein FliM	0	5.83945	24.563	4.03199	11.824	29.9564	9.63614	12.2644	0.124352
	Ga0306812_10557	2784405628				flagellar motor switch protein FliN/FliY	9.6478	13.9909	45.3341	9.31438	21.1967	59.5511	19.9481	25.569	0.214301
	Ga0306812_10558	2784405629				flagellar protein FliO/FliZ	14.8536	10.4437	43.6223	10.6528	18.9278	62.2323	32.7003	27.6333	0.225285
	Ga0306812_10559	2784405630				flagellar biosynthetic protein FliP	4.5237	4.3734	17.5053	5.11606	13.318	23.7888	9.55523	11.1686	0.115855
	Ga0306812_10560	2784405631				flagellar biosynthetic protein FliQ	0	6.44402	15.1996	1.51685	7.24897	21.4907	4.63524	8.07649	0.095544
	Ga0306812_10561	2784405632				flagellar biosynthetic protein FliR	6.63369	6.0246	20.7807	5.00156	14.9632	21.1976	7.5652	11.7381	0.12
	Ga0306812_10562	2784405633				flagellar biosynthetic protein FlhB	6.24518	4.1166	19.4198	2.84241	9.74188	14.6441	6.22412	9.03344	0.101762
	Ga0306812_10563	2784405634				flagellar biosynthesis protein FlhA	5.95719	5.8247	23.7214	5.3405	15.1823	24.1115	13.2477	13.3408	0.130363
	Ga0306812_10564	2784405635				flagellar biosynthesis protein FlhF	3.88565	3.75655	14.2307	2.71527	8.53696	13.399	6.74325	7.60963	0.0924352
	Ga0306812_10565	2784405636				flagellar biosynthesis protein FlhG	7.50177	5.93388	20.9945	3.93165	9.39459	17.3966	7.64386	10.3995	0.110259
	Ga0306812_10566	2784405637				RNA polymerase sigma-28 (SigD/FliA/WhiG) subunit	4.50309	4.15558	16.0253	2.98112	6.72758	13.8976	4.68885	7.56845	0.091399
	Ga0306812_10567	2784405638				chemotaxis protein MotA	2.25154	3.56193	11.98	2.48426	4.94675	7.84169	3.81807	5.26918	0.0715026
	Ga0306812_10568	2784405639				chemotaxis protein MotB	4.90553	4.95811	24.237	5.6832	11.2088	18.9458	8.7564	11.2421	0.116684
	Ga0306812_10569	2784405640				chemotaxis protein MotB	2.58091	2.94882	9.80896	3.27482	6.35083	8.72181	3.37842	5.29494	0.0721244
	Ga0306812_10570	2784405641				PAS domain S-box-containing protein	1.48432	4.74984	13.8327	2.60882	7.68402	8.14101	5.09178	6.22749	0.0826943
	Ga0306812_10571	2784405642				PAS domain S-box-containing protein	4.44641	3.84086	16.4514	3.23284	7.79953	10.8034	5.08236	7.37954	0.0903627
	Ga0306812_10572	2784405643				response regulator RpfG family c-di-GMP phosphodiesterase	6.07771	2.88447	10.1635	2.68236	4.91391	4.94607	2.893	4.93729	0.0688083
	Ga0306812_10573	2784405644				two-component system chemotaxis sensor kinase CheA	7.27112	4.98458	16.229	3.77065	6.7734	12.1103	5.10507	8.03488	0.0953368
	Ga0306812_10574	2784405645				purine-binding chemotaxis protein CheW	0	6.18683	29.8205	9.11778	20.7109	24.3797	10.9264	14.4489	0.138238
	Ga0306812_10575	2784405646				hypothetical protein	5.59134	13.7596	44.4325	10.1022	22.6034	34.609	12.2262	20.4749	0.181347
	Ga0306812_10576	2784405647				phosphate ABC transporter substrate-binding protein (PhoT family)	4.51527	7.14314	24.0249	6.22747	17.8565	16.3486	7.52248	11.9483	0.121658
	Ga0306812_10577	2784405648				methyl-accepting chemotaxis protein	7.08023	6.4894	25.0918	6.08224	13.0667	19.218	8.15469	12.169	0.123316
	Ga0306812_10578	2784405649				methyl-accepting chemotaxis protein	3.87513	3.14337	8.41097	2.51612	4.94831	5.84037	3.33909	4.58191	0.0667358
	Ga0306812_10579	2784405650				methyl-accepting chemotaxis protein	9.89885	3.24652	9.42801	2.40332	5.53078	7.87872	3.19973	5.94085	0.0795855
	Ga0306812_10580	2784405651				methyl-accepting chemotaxis protein	5.42056	5.52591	13.6914	3.45447	6.66078	10.1738	4.80558	7.10464	0.0878756
	Ga0306812_10581	2784405652				hypothetical protein	12.7711	1.57141	7.76602	2.39549	3.59152	5.5489	2.43163	5.15372	0.0706736
	Ga0306812_10582	2784405653				hypothetical protein	8.54643	5.25794	21.0637	6.4437	9.51365	16.1107	6.86495	10.543	0.111088
	Ga0306812_10583	2784405654				hypothetical protein	11.6439	8.31488	26.2505	9.63561	18.6751	27.0525	12.2975	16.2672	0.152124
	Ga0306812_10584	2784405655				methyl-accepting chemotaxis protein	7.45973	4.49023	13.3405	4.13534	7.24717	10.7132	4.4996	7.41224	0.0907772
	Ga0306812_10585	2784405656				two-component system chemotaxis response regulator CheY	28.2571	11.9207	53.8921	12.1594	22.3496	31.9602	9.75158	24.3272	0.205389
	Ga0306812_10586	2784405657				response regulator receiver-modulated CheB methylesterase	21.0594	19.5665	52.7004	12.365	29.3475	40.6671	18.0796	27.6836	0.226114
	Ga0306812_10587	2784405658				chemotaxis protein methyltransferase CheR	18.0026	15.9805	66.1812	13.3085	31.4839	43.7656	16.9243	29.3781	0.236891
	Ga0306812_10588	2784405659				response regulator receiver protein	21.6171	39.4229	109.419	27.7273	62.217	78.6427	40.9984	54.2921	0.364974
	Ga0306812_10589	2784405660				chemotaxis regulatin CheY-phosphate phosphatase CheZ	23.2282	20.6418	69.0194	17.798	32.6614	46.19	22.3437	33.1261	0.258446
	Ga0306812_10590	2784405661				chemotaxis protein MotA	20.1719	15.168	44.6052	11.6231	19.5002	32.7702	11.6023	22.2058	0.190259
	Ga0306812_10591	2784405662				chemotaxis protein MotB	33.3176	18.3503	63.6968	17.8905	34.7458	56.296	26.6964	35.8562	0.275648
	Ga0306812_10592	2784405663				EAL and modified HD-GYP domain-containing signal transduction protein	10.5555	8.69723	31.1818	6.1144	11.7114	19.5643	7.73289	13.6511	0.131813
	Ga0306812_10593	2784405664				flagellar basal-body rod protein FlgG	9.21619	11.34	39.6441	11.567	29.9677	39.3283	16.1082	22.4531	0.192539
	Ga0306812_10594	2784405665				flagellar basal-body rod protein FlgG	15.3413	10.594	41.4955	15.8388	32.9351	54.1864	39.5116	29.9861	0.242073
	Ga0306812_10595	2784405666				flagella basal body P-ring formation protein FlgA	13.9545	10.4247	48.8566	15.6534	44.3528	55.0166	29.1987	31.0653	0.247047
	Ga0306812_10596	2784405667				flagellar L-ring protein precursor FlgH	5.05616	6.2213	24.4572	8.64708	19.1068	23.4504	12.861	14.2571	0.135959
	Ga0306812_10597	2784405668				flagellar P-ring protein precursor FlgI	11.6439	7.93112	29.3684	8.83264	19.4426	25.5468	13.4233	16.5984	0.155026
	Ga0306812_10598	2784405669				rod binding protein	0	3.59532	7.5381	1.88067	14.3802	6.58295	6.08505	5.72318	0.0762694
	Ga0306812_10599	2784405670				FlgM family anti-sigma-28 factor	7.31823	12.2206	41.9731	18.5717	33.4433	37.3487	28.0856	25.5659	0.214093
	Ga0306812_105100	2784405671				flagellar biosynthesis/type III secretory pathway chaperone	6.00952	8.97887	36.3359	11.2721	23.7658	32.2239	17.1633	19.3928	0.173472
	Ga0306812_105101	2784405672				flagellar hook-associated protein 1 FlgK	7.71269	7.96483	24.5161	7.76527	17.1146	22.9722	12.9928	14.4341	0.138031
	Ga0306812_105102	2784405673				flagellar hook-associated protein 3 FlgL	14.912	8.57846	29.5082	9.79723	20.968	20.9426	12.7041	16.7729	0.156477
	Ga0306812_105103	2784405674				carbon storage regulator CsrA	0	11.2555	28.5907	9.78246	10.3889	17.6644	10.2576	12.5628	0.12601
	Ga0306812_105104	2784405675				flagellar assembly factor FliW	16.143	6.73922	27.6087	6.23403	14.5414	19.7615	12.1264	14.7363	0.140933
