# Supplementary material for: Bacterial chemolithoautotrophy via manganese oxidation
Source: Springer Nature journal article supplement (doi:10.1038/s41586-020-2468-5), 2020-07-15
Supplement: MOESM7 [file 41586_2020_2468_MOESM7_ESM.xlsx]

## Sheet: Sheet1
Supplementary Table 5 | Key genomic features and their expression in Species B.
					Expression (Transcript per million; TPM)
					Mn(II)-oxidizing co-cultures - Sample (% Mn(II) oxidized)
	IMG locus tag	IMG gene ID	Gene name	Gene product name	Mn12 (18% Mn(II) oxidized)	Mn09 (19% Mn(II) oxidized)	Mn10 (45% Mn(II) oxidized)	Mn11 (61% Mn(II) oxidized)	Mn08 (66% Mn(II) oxidized)	Mn06 (73% Mn(II) oxidized)	Mn03 (77% Mn(II) oxidized)	Percentile (Species B only)
Carbon Metabolism
Carbon Update
	Ga0265800_1011074	2778263227		carbonic anhydrase/acetyltransferase-like protein (isoleucine patch superfamily)	7.13842	5.33278	3.45293	9.64841	10.3511	11.9386	13.1669	0.702966
	Ga0265800_10961	2778266199		carbonic anhydrase	0	3.04425	1.47293	2.64584	3.74648	2.48071	8.40231	0.390205
Calvin Benson Bassham Cycle
	Ga0265800_102394	2778263744		ribulose 1,5-bisphosphate carboxylase large subunit	8.81351	7.45559	0.685155	12.0948	3.38865	5.85043	4.81798	0.608401
	Ga0265800_102395	2778263745		ribulose 1,5-bisphosphate carboxylase small subunit	4.55692	15.6196	0.31489	12.5698	2.00236	4.71413	4.20264	0.61298
	Ga0265800_102396	2778263746		probable Rubsico expression protein CbbX	3.54879	6.86177	0.490454	6.8523	2.18312	2.44748	2.85058	0.437388
	Ga0265800_102400	2778263750		phosphoribulokinase	5.73519	2.01623	0.660517	0.632798	0.672026	0.329613	0.568742	0.196098
Nitrogen Metabolism
	Ga0265800_10170	2778262223		amino acid/amide ABC transporter substrate-binding protein (HAAT family)	2.91959	8.85265	2.82447	5.79845	6.28619	8.20517	11.1178	0.626717
	Ga0265800_101109	2778262262		aspartate aminotransferase	0	2.81317	0.829434	2.72233	3.04737	2.52943	6.9435	0.349393
	Ga0265800_101121	2778262274		amino acid/amide ABC transporter substrate-binding protein (HAAT family)	0	4.29196	1.15444	0.779866	3.16226	1.15218	5.00841	0.291061
	Ga0265800_101122	2778262275		branched-chain amino acid transport system permease protein	0	4.03626	0.965838	0.881244	3.50953	0.826244	6.83133	0.314354
	Ga0265800_101123	2778262276		amino acid/amide ABC transporter membrane protein 2 (HAAT family)	0	1.76969	1.1595	0.37028	1.62209	0.752202	3.39453	0.16743
	Ga0265800_101124	2778262277		amino acid/amide ABC transporter ATP-binding protein 1 (HAAT family)	0	2.41871	0.633896	0.759119	2.01544	0.948987	3.4796	0.187935
	Ga0265800_101125	2778262278		amino acid/amide ABC transporter ATP-binding protein 2 (HAAT family)	2.47737	1.08866	0.342379	0.9567	2.61259	1.11056	3.6851	0.230938
	Ga0265800_101130	2778262283		amino acid ABC transporter ATP-binding protein (PAAT family)	0	0.570263	0.298909	0.357956	0.190073	0.223744	0.643443	0.0230938
	Ga0265800_101131	2778262284		amino acid ABC transporter substrate-binding protein (PAAT family)	0	0	0.146882	0.117265	0.186802	0.219893	0.695605	0.00856062
	Ga0265800_101132	2778262285		amino acid ABC transporter membrane protein 2 (PAAT family)	0	0.71801	0	0	0	0.187808	0.648119	0.0123432
	Ga0265800_101133	2778262286		amino acid ABC transporter membrane protein 1 (PAAT family)	0	1.62172	0	0.290845	0.231656	0.363591	0.156842	0.0302608
	Ga0265800_101275	2778262428		nitric oxide reductase NorZ apoprotein	1.37146	0.602679	1.23201	2.53464	14.0414	1.20596	30.866	0.662154
	Ga0265800_101277	2778262430		BadM/Rrf2 family transcriptional regulator	12.4114	1.45443	1.14353	5.70594	10.1802	3.42389	15.7543	0.652001
	Ga0265800_101320	2778262473		methionine aminotransferase	2.8036	4.06568	2.42166	2.78405	3.81898	1.93355	5.37978	0.410512
	Ga0265800_101328	2778262481		amino acid/amide ABC transporter substrate-binding protein (HAAT family)	10.1585	10.0761	6.51828	8.32633	16.3246	9.20785	25.4294	0.776827
	Ga0265800_101395	2778262548		aspartate aminotransferase	0	5.83812	2.15457	2.24364	3.57409	4.06698	7.0175	0.432212
	Ga0265800_101426	2778262579		amino acid/amide ABC transporter ATP-binding protein 2 (HAAT family)	0	2.40713	1.03232	1.23624	2.40694	2.31817	3.99996	0.253832
	Ga0265800_101427	2778262580		amino acid/amide ABC transporter ATP-binding protein 1 (HAAT family)	2.00483	4.93365	0.969758	1.54844	2.46664	2.90359	3.87686	0.345013
	Ga0265800_101428	2778262581		amino acid/amide ABC transporter membrane protein 2 (HAAT family)	1.12682	4.75365	1.5573	1.67844	4.35719	3.73021	5.33015	0.400557
	Ga0265800_101429	2778262582		amino acid/amide ABC transporter membrane protein 1 (HAAT family)	0	7.14799	1.58827	1.85325	6.21517	3.2313	11.4667	0.511248
	Ga0265800_101430	2778262583		amino acid/amide ABC transporter substrate-binding protein (HAAT family)	0	12.0602	3.13173	4.306	11.5061	4.2543	18.9511	0.6739
	Ga0265800_101456	2778262609		succinyldiaminopimelate aminotransferase	1.35564	1.90632	0.749414	1.72012	2.02532	2.57108	3.91205	0.269759
	Ga0265800_101550	2778262703		amino acid/amide ABC transporter ATP-binding protein 2 (HAAT family)	2.72318	2.87204	0.376352	1.20186	1.43591	1.97199	3.56466	0.267967
	Ga0265800_101551	2778262704		amino acid/amide ABC transporter ATP-binding protein 1 (HAAT family)	0	3.31867	0.306973	0.735226	2.34241	0.765932	1.91632	0.173601
	Ga0265800_101552	2778262705		amino acid/amide ABC transporter membrane protein 2 (HAAT family)	0	2.96965	0.933943	0.466016	2.96943	0.524317	3.01566	0.202469
	Ga0265800_101553	2778262706		amino acid/amide ABC transporter membrane protein 1 (HAAT family)	0	3.04486	1.12658	0.562138	1.97005	1.47575	5.03213	0.249253
	Ga0265800_101554	2778262707		amino acid/amide ABC transporter substrate-binding protein (HAAT family)	1.21554	3.73913	1.34393	0.536473	3.0979	0.922148	4.15869	0.281903
	Ga0265800_101569	2778262722		amino acid/amide ABC transporter substrate-binding protein (HAAT family)	1.37069	5.66198	2.93621	2.79787	5.54109	3.59219	12.1519	0.534541
	Ga0265800_101570	2778262723		amino acid/amide ABC transporter membrane protein 1 (HAAT family)	1.96496	4.31744	1.62938	1.84285	3.10832	1.6262	5.49503	0.368704
	Ga0265800_101571	2778262724		amino acid/amide ABC transporter membrane protein 2 (HAAT family)	0	1.56892	1.12141	0.89529	0.99833	0.783452	1.44839	0.119251
	Ga0265800_101572	2778262725		amino acid/amide ABC transporter ATP-binding protein 1 (HAAT family)	0	1.62759	0.799796	1.27705	2.23776	1.67629	2.68581	0.190325
	Ga0265800_101573	2778262726		amino acid/amide ABC transporter ATP-binding protein 2 (HAAT family)	4.8573	1.7076	1.17476	1.07187	1.70747	1.59121	3.61263	0.295043
	Ga0265800_101618	2778262771		branched-subunit amino acid transport protein	6.72573	0.591115	1.39427	1.48418	2.95535	2.08732	4.402	0.364324
	Ga0265800_101619	2778262772		predicted branched-subunit amino acid permease	0	0.829339	0.489044	1.69188	1.86587	1.78966	3.86003	0.193908
	Ga0265800_101628	2778262781		respiratory nitrite reductase (cytochrome ammonia-forming) precursor	0	0.739953	0.363613	0.522531	0.369949	0.653224	0.970581	0.0481784
	Ga0265800_101629	2778262782		respiratory nitrite reductase-specific menaquinol--cytochrome-c reductase (NrfH) precursor	0	2.2612	0.253978	0.405532	0.646008	0.506963	1.85886	0.0963568
	Ga0265800_101695	2778262848		nitrate reductase NapE	0	4.12821	0	2.59129	1.03197	4.4542	8.38433	0.375871
	Ga0265800_101696	2778262849	napC	periplasmic nitrate reductase subunit NapC	0	3.30994	1.08434	4.15533	4.96453	3.67954	4.20153	0.385427
	Ga0265800_101697	2778262850	napB	periplasmic nitrate reductase subunit NapB	7.75473	3.40776	1.87552	4.27813	2.38525	3.3426	4.72943	0.47183
	Ga0265800_101698	2778262851	napA	periplasmic nitrate reductase subunit NapA apoprotein	1.85622	4.40478	1.75299	2.62836	3.26256	3.32843	4.52825	0.389807
	Ga0265800_101699	2778262852	napD	periplasmic nitrate reductase chaperone NapD	7.21263	7.6069	1.99362	9.94767	13.3111	7.21274	15.2349	0.709934
	Ga0265800_101797	2778262950		aromatic-amino-acid transaminase	2.71874	8.84101	4.03918	9.14924	11.4686	10.3126	16.3383	0.711726
	Ga0265800_101909	2778263062		alanine-synthesizing transaminase	2.65304	11.7752	4.21656	7.53769	12.0074	14.5004	15.0358	0.733028
	Ga0265800_101992	2778263145		amino acid/amide ABC transporter ATP-binding protein 2 (HAAT family)	0	1.215	0.318426	0.762659	0.809937	0.873962	1.09673	0.0764483
	Ga0265800_101993	2778263146		amino acid/amide ABC transporter ATP-binding protein 1 (HAAT family)	0	0.399411	0.314032	0	2.39628	0.470128	0.946398	0.0668923
	Ga0265800_101994	2778263147		amino acid/amide ABC transporter membrane protein 2 (HAAT family)	0	0.909559	0.476754	0.380623	1.06107	0.356867	1.02628	0.0593271
	Ga0265800_101995	2778263148		amino acid/amide ABC transporter membrane protein 1 (HAAT family)	1.94179	0.682644	0.670902	0.856997	1.19454	0.669591	2.1952	0.149313
	Ga0265800_101996	2778263149		amino acid/amide ABC transporter substrate-binding protein (HAAT family)	0	1.59259	0.28896	0.84588	1.83747	0.769054	2.11489	0.131196
	Ga0265800_1011012	2778263165		amino acid/amide ABC transporter substrate-binding protein (HAAT family)	0	4.19667	1.49981	0.87809	4.19635	1.69647	5.76835	0.33705
	Ga0265800_1011013	2778263166		amino acid/amide ABC transporter membrane protein 1 (HAAT family)	0	2.52584	0.551643	0.616576	2.94659	0.660678	4.17996	0.21302
	Ga0265800_1011014	2778263167		amino acid/amide ABC transporter membrane protein 2 (HAAT family) /amino acid/amide ABC transporter ATP-binding protein 1 (HAAT family)	0	1.97212	0.596367	0.333282	1.06183	0.595202	1.87429	0.111288
	Ga0265800_1011015	2778263168		amino acid/amide ABC transporter ATP-binding protein 2 (HAAT family)	0	2.06349	0.48672	0.906684	1.65067	1.37635	3.07335	0.17619
	Ga0265800_1011090	2778263243		dissimilatory nitrite reductase (NO-forming) cytochrome cd1 type apoprotein	4.51223	1.90355	2.18261	2.24038	14.6721	2.92521	21.4514	0.65001
	Ga0265800_1011094	2778263247		glutamate dehydrogenase/leucine dehydrogenase	2.40154	15.0913	2.73817	5.96197	8.9697	9.52347	11.2527	0.682461
	Ga0265800_1011152	2778263305		aspartate/methionine/tyrosine aminotransferase	1.4179	3.36465	1.17574	4.61513	4.48587	5.13383	5.69464	0.443958
	Ga0265800_1011153	2778263306		amino acid/amide ABC transporter substrate-binding protein (HAAT family)	6.75965	6.53506	2.42893	5.14625	2.85145	5.1747	5.95257	0.5435
	Ga0265800_1011157	2778263310		nitrate/nitrite transport system substrate-binding protein	1.23995	5.01296	5.05526	3.76231	10.8969	3.07854	20.8052	0.649413
	Ga0265800_1011158	2778263311		nitrate/nitrite transport system permease protein	0	7.05254	5.40975	5.07475	17.716	4.25185	46.6391	0.777623
	Ga0265800_1011159	2778263312		nitrate/nitrite transport system ATP-binding protein	3.86837	7.81967	7.08372	6.40231	20.9075	5.20236	34.1225	0.775632
	Ga0265800_1011160	2778263313		assimilatory nitrite reductase (NAD(P)H) large subunit precursor	1.85854	7.51386	6.54983	11.3811	25.861	6.96429	50.2419	0.828987
	Ga0265800_1011161	2778263314		assimilatory nitrite reductase (NAD(P)H) small subunit	0	6.24584	10.2307	18.6226	35.9109	9.18962	65.0118	0.869401
	Ga0265800_1011162	2778263315		assimilatory nitrate reductase (NADH) alpha subunit apoprotein	0.552327	4.07763	4.23649	8.98888	12.8144	5.06624	29.1993	0.721083
	Ga0265800_10211	2778263363		alanine-glyoxylate transaminase/serine-glyoxylate transaminase/serine-pyruvate transaminase	2.749	2.41606	1.99458	5.45965	5.91889	12.1337	9.77307	0.590484
	Ga0265800_10225	2778263377		branched-chain amino acid transport system ATP-binding protein	0	1.97885	1.08909	0.621066	1.38509	1.31989	2.74633	0.168624
	Ga0265800_10226	2778263378		amino acid/amide ABC transporter substrate-binding protein (HAAT family)	0	1.84804	0.484333	0.773346	2.46386	1.45016	1.62645	0.156679
	Ga0265800_10228	2778263380		amino acid/amide ABC transporter ATP-binding protein 1 (HAAT family)	0	1.95959	0.17119	0.410014	0.653147	0.768848	1.32663	0.082819
	Ga0265800_10229	2778263381		branched-chain amino acid transport system permease protein	1.66664	1.02535	0	0.275836	0.878807	0.804597	1.1404	0.0935696
	Ga0265800_10230	2778263382		amino acid/amide ABC transporter membrane protein 1 (HAAT family)	0	0.345395	0.271563	0.542015	0.518053	0.813098	1.1107	0.0479793
	Ga0265800_102130	2778263482		amino acid/amide ABC transporter substrate-binding protein (HAAT family)	0	2.74157	0.489893	0.860448	2.74136	1.41792	4.72444	0.24348
	Ga0265800_102131	2778263483		branched-chain amino acid transport system permease protein	0	1.21371	0.408971	0.435343	1.56037	0.952402	2.81718	0.129405
	Ga0265800_102132	2778263484		branched-chain amino acid transport system permease protein	0	1.06586	0.279341	0.334523	1.24341	0.55759	1.44317	0.073263
	Ga0265800_102133	2778263485		amino acid/amide ABC transporter ATP-binding protein 1 (HAAT family)	4.54451	1.59764	0.157016	0.752135	0.798761	0.548483	1.4872	0.182361
	Ga0265800_102134	2778263486		amino acid/amide ABC transporter ATP-binding protein 2 (HAAT family)	2.48985	1.09415	0.516158	0.274721	2.18813	0.429291	2.59257	0.177384
	Ga0265800_102143	2778263495		nitrite reductase (NO-forming)	1.07297	0.754418	0	1.06549	1.41443	1.18399	2.80906	0.150109
	Ga0265800_102144	2778263496		branched-chain amino acid transport system ATP-binding protein	0	0.207335	0.326029	0.390435	0.414638	0.162696	0.631641	0.0215011
	Ga0265800_102145	2778263497		amino acid/amide ABC transporter ATP-binding protein 1 (HAAT family)	0	0.403119	0.316948	0.379559	0.806177	0.158164	0.409365	0.0266773
	Ga0265800_102146	2778263498		amino acid/amide ABC transporter membrane protein 2 (HAAT family)	0	0.776955	0	0.487698	0.466138	0.487744	0.683794	0.0366315
	Ga0265800_102147	2778263499		amino acid/amide ABC transporter membrane protein 1 (HAAT family)	0	0	0.131089	0.104656	0.166716	0.392498	0.338624	0.00597253
	Ga0265800_102148	2778263500		amino acid/amide ABC transporter substrate-binding protein (HAAT family)	2.68184	1.76778	0.648618	0.813736	1.53196	0.739829	2.79248	0.203464
	Ga0265800_102176	2778263528		nitrous oxide reductase apoprotein	0	0.427472	0.448127	1.11802	14.3192	0.810644	30.0731	0.633088
	Ga0265800_102290	2778263641		alanine-glyoxylate transaminase/serine-glyoxylate transaminase/serine-pyruvate transaminase	0	1.03812	0.362761	0.651634	1.15338	1.0409	1.1323	0.0844117
	Ga0265800_102298	2778263649		amino acid/amide ABC transporter ATP-binding protein 2 (HAAT family)	0	4.14669	1.46713	1.95217	3.52442	3.17258	8.98334	0.411905
	Ga0265800_102299	2778263650		amino acid/amide ABC transporter ATP-binding protein 1 (HAAT family)	2.44065	6.22065	1.51787	2.55827	3.00284	3.19813	7.624	0.453514
	Ga0265800_102300	2778263651		amino acid/amide ABC transporter membrane protein 1 (HAAT family)	1.91916	5.06016	1.06093	1.58814	3.03587	1.72065	5.48113	0.367111
	Ga0265800_102301	2778263652		amino acid/amide ABC transporter membrane protein 2 (HAAT family)	0	5.29109	1.6178	2.67544	4.8498	4.15194	8.15911	0.455903
	Ga0265800_102303	2778263654		amino acid/amide ABC transporter substrate-binding protein (HAAT family)	1.30894	2.41587	0.81405	1.37203	3.22091	1.98601	3.58259	0.277324
	Ga0265800_102426	2778263776		NNP family nitrate/nitrite transporter-like MFS transporter	0	0.420093	0.412868	0.197771	1.26018	0.288443	1.70641	0.0609198
	Ga0265800_102427	2778263777		NNP family nitrate/nitrite transporter-like MFS transporter	0	0.300531	0.157526	0.0628815	0.701186	0.314437	0.508645	0.0205057
	Ga0265800_102428	2778263778		respiratory nitrate reductase alpha subunit apoprotein	0	0.389106	0.111248	0.266448	0.318336	0.180424	0.431056	0.0147322
	Ga0265800_102429	2778263779		respiratory nitrate reductase beta subunit	0	0.0915193	0.215868	0.114894	0.274537	0.287262	0.557624	0.0115469
	Ga0265800_102430	2778263780		respiratory nitrate reductase chaperone NarJ	0	1.14614	0.180228	1.00721	0.458421	0.809441	1.00871	0.068485
	Ga0265800_102431	2778263781		nitrate reductase gamma subunit	0	0.388684	0.458398	0.487957	0.582982	0.457502	1.77618	0.0585308
	Ga0265800_102470	2778263820		amino acid/amide ABC transporter membrane protein 2 (HAAT family)	0	1.90304	0.748121	1.36519	2.44658	1.27999	2.34663	0.184551
	Ga0265800_102471	2778263821		amino acid/amide ABC transporter membrane protein 1 (HAAT family)	1.71287	1.05379	0.828534	1.70092	1.80637	1.3585	2.54791	0.204459
	Ga0265800_102472	2778263822		branched-chain amino acid transport system ATP-binding protein	0	1.26823	1.32951	1.06143	2.74763	1.07812	4.22139	0.216604
	Ga0265800_102473	2778263823		branched-chain amino acid transport system ATP-binding protein	1.90436	1.84109	2.50029	1.78602	5.6902	2.62674	7.59176	0.419869
	Ga0265800_102474	2778263824		amino acid/amide ABC transporter substrate-binding protein (HAAT family)	0	1.08421	1.89433	1.81483	5.05926	2.17422	6.89149	0.350587
	Ga0265800_102476	2778263826		general L-amino acid transport system ATP-binding protein	0	1.64299	0.484418	0.644568	3.69644	2.2562	2.91977	0.215608
	Ga0265800_102477	2778263827		amino acid ABC transporter membrane protein 2 (PAAT family)	0	1.80151	1.31525	0.807727	2.5734	1.86804	2.265	0.196894
	Ga0265800_102478	2778263828		amino acid ABC transporter membrane protein 1 (PAAT family)	2.77994	2.44325	1.05654	1.61032	3.17598	2.44446	5.62383	0.355963
	Ga0265800_102479	2778263829		amino acid ABC transporter substrate-binding protein (PAAT family)	1.60179	2.67481	1.88167	2.03246	5.48998	3.53504	6.86211	0.422258
	Ga0265800_102488	2778263838		adenosylmethionine-8-amino-7-oxononanoate aminotransferase	3.62877	5.74069	1.83886	2.6025	2.44492	3.33684	6.47737	0.446148
	Ga0265800_102519	2778263869		aspartate/methionine/tyrosine aminotransferase	1.37833	2.4228	2.47637	3.0416	2.78601	3.46965	5.20771	0.379056
	Ga0265800_102606	2778263954		L-glutamine synthetase	2.25879	8.93348	6.71168	4.7976	9.32981	6.54279	18.2446	0.685049
	Ga0265800_102653	2778264001		amino acid ABC transporter ATP-binding protein (PAAT family)	0	4.39876	1.72924	1.79473	9.89647	3.36543	16.1553	0.566793
	Ga0265800_102755	2778264103		dTDP-4-amino-4,6-dideoxygalactose transaminase	1.07766	2.7467	1.19148	1.90247	3.88297	2.26682	4.777	0.329285
	Ga0265800_1037	2778264123		amino acid/amide ABC transporter substrate-binding protein (HAAT family)	1.33729	0.470131	0.0924088	0.221327	0.352571	0.368913	1.15375	0.0551463
	Ga0265800_103108	2778264224		amino acid/amide ABC transporter ATP-binding protein 1 (HAAT family)	2.17234	3.43662	2.25167	1.79765	4.96364	1.72291	9.75871	0.446546
	Ga0265800_103109	2778264225		amino acid/amide ABC transporter ATP-binding protein 2 (HAAT family)	4.9797	3.93893	1.72053	1.78568	4.59507	1.80302	7.99992	0.457296
	Ga0265800_103110	2778264226		amino acid/amide ABC transporter substrate-binding protein (HAAT family)	4.03371	7.20852	3.25191	3.70887	9.33492	3.9874	14.4804	0.626916
	Ga0265800_103111	2778264227		amino acid/amide ABC transporter membrane protein 1 (HAAT family)	1.90436	4.85378	2.10551	1.78602	5.35548	3.02075	8.6682	0.46964
	Ga0265800_103112	2778264228		amino acid/amide ABC transporter membrane protein 2 (HAAT family)	1.62819	2.57579	1.1251	1.70666	3.00486	3.25643	6.00642	0.358949
	Ga0265800_103200	2778264316		amino acid/amide ABC transporter ATP-binding protein 1 (HAAT family)	2.09851	2.02879	0.580041	0.463083	0.737685	0.144727	1.8105	0.140155
	Ga0265800_103201	2778264317		amino acid/amide ABC transporter membrane protein 1 (HAAT family)	3.79409	1.33383	0.262178	0.418626	0.666865	0.392498	1.18518	0.144336
	Ga0265800_103202	2778264318		amino acid/amide ABC transporter membrane protein 2 (HAAT family)	0	1.79406	0.352641	0.0938451	0.448482	0.175976	0.607287	0.0461875
	Ga0265800_103203	2778264319		amino acid/amide ABC transporter substrate-binding protein (HAAT family)	0	0.703292	0.184319	0.294306	0.820445	0.321927	0.952252	0.042604
	Ga0265800_103204	2778264320		amino acid/amide ABC transporter ATP-binding protein 2 (HAAT family)	1.95717	1.37611	0	0.32392	0.688001	0.337448	1.22275	0.0955604
	Ga0265800_103227	2778264343		histidinol-phosphate aminotransferase	0	0.436491	0.343187	0.0913292	0.436458	0.171258	0.394004	0.0171212
	Ga0265800_103361	2778264477		histidinol phosphate aminotransferase	4.59672	2.55866	5.71752	2.70498	2.82778	2.64183	8.75218	0.493729
	Ga0265800_103374	2778264490		glutamate synthase (NADH) small subunit	7.64363	7.77355	15.3929	33.795	32.8192	46.2766	42.0363	0.897073
	Ga0265800_103375	2778264491		glutamate synthase (NADH) large subunit	11.8658	10.5133	16.5984	58.473	62.1447	78.4725	83.4056	0.941071
	Ga0265800_103412	2778264528		branched chain amino acid aminotransferase	0	2.76019	1.14892	1.8345	2.75998	2.10223	6.48528	0.315947
	Ga0265800_103457	2778264573		BadM/Rrf2 family transcriptional regulator	0	1.74497	1.37196	3.50504	1.74484	3.97092	6.49735	0.348397
	Ga0265800_10454	2778264692		glutamine synthetase	2.37841	1.98584	0.575232	3.28031	2.61274	5.331	5.41299	0.387617
	Ga0265800_10491	2778264729		formate/nitrite transporter	6.11374	3.40308	2.81646	2.13613	4.2983	3.58397	6.91161	0.486562
	Ga0265800_10493	2778264731		ammonium transporter	2.71128	2.74034	2.52927	1.34618	2.85927	4.06698	4.43635	0.378061
	Ga0265800_104102	2778264740		amino acid/amide ABC transporter ATP-binding protein 2 (HAAT family)	0	4.13673	1.85855	0.741898	1.77275	2.31865	4.86762	0.294446
	Ga0265800_104103	2778264741		amino acid/amide ABC transporter membrane protein 2 (HAAT family) /amino acid/amide ABC transporter ATP-binding protein 1 (HAAT family)	1.70816	4.05344	2.18367	1.08371	2.55197	1.76708	4.34493	0.325901
	Ga0265800_104104	2778264742		amino acid/amide ABC transporter membrane protein 1 (HAAT family)	1.61225	8.2185	2.33959	2.40151	4.95907	2.5018	9.16124	0.508262
	Ga0265800_104105	2778264743		amino acid/amide ABC transporter substrate-binding protein (HAAT family)	7.15105	8.67324	3.85436	2.60376	8.5469	3.45228	13.6582	0.636472
	Ga0265800_104262	2778264900		ammonium transporter	10.5691	83.4151	25.5618	21.8653	63.439	36.0082	72.2876	0.938682
	Ga0265800_104279	2778264917		branched chain amino acid aminotransferase	7.1749	7.09416	4.83401	8.6092	12.138	9.71099	15.3153	0.720884
	Ga0265800_104359	2778264997		ornithine--oxo-acid transaminase	22.4317	14.129	11.0227	44.8942	32.5271	99.7838	56.5761	0.931117
	Ga0265800_10669	2778265421		acetylornithine aminotransferase	8.15622	15.7705	6.19968	8.54929	13.4994	11.3439	15.8126	0.762891
	Ga0265800_10677	2778265429		phosphoserine aminotransferase	1.52279	2.94439	1.05227	2.10024	3.21182	2.57303	3.39774	0.310571
	Ga0265800_106106	2778265458		amino acid/amide ABC transporter membrane protein 1 (HAAT family)	9.82479	12.9523	8.01111	2.49327	3.45369	1.42292	4.67662	0.605614
	Ga0265800_106107	2778265459		amino acid/amide ABC transporter membrane protein 2 (HAAT family)	8.22225	24.5698	9.54526	3.90101	5.20263	1.81459	6.21317	0.696596
	Ga0265800_106108	2778265460		amino acid/amide ABC transporter ATP-binding protein 1 (HAAT family)	27.1422	25.644	10.7845	5.61519	7.95104	2.80786	10.2954	0.790364
	Ga0265800_106109	2778265461		amino acid/amide ABC transporter ATP-binding protein 2 (HAAT family)	24.7737	28.3052	14.3799	7.24359	8.2732	4.44224	14.3719	0.813657
	Ga0265800_106110	2778265462		amino acid/amide ABC transporter substrate-binding protein (HAAT family)	35.2451	49.3144	22.7962	19.9884	23.6642	18.9597	42.6128	0.909417
	Ga0265800_10721	2778265680		4-aminobutyrate--pyruvate transaminase	1.15853	2.13825	1.36095	1.21436	2.13809	1.39824	2.37818	0.218794
	Ga0265800_107169	2778265828		amino acid/amide ABC transporter ATP-binding protein 1 (HAAT family)	0	3.0361	0.530466	0.847009	0.674637	0.52943	1.65576	0.127016
	Ga0265800_107170	2778265829		amino acid/amide ABC transporter membrane protein 1 (HAAT family)	0	1.74681	0.749135	0.299041	1.4291	0.685365	2.15016	0.122835
	Ga0265800_107171	2778265830		amino acid/amide ABC transporter membrane protein 2 (HAAT family)	0	2.02	0.95292	0.507184	0.942593	0.792549	1.32194	0.113279
	Ga0265800_107172	2778265831		amino acid/amide ABC transporter substrate-binding protein (HAAT family)	0	3.87456	0.846204	0.945809	3.65903	2.1536	3.31526	0.278718
	Ga0265800_107173	2778265832		amino acid/amide ABC transporter ATP-binding protein 2 (HAAT family)	0	2.60422	0.877517	0.467051	1.67401	0.875802	1.76305	0.149512
	Ga0265800_10819	2778265921		formate-dependent nitrite reductase cytochrome c552 subunit	0	1.21638	0.510064	0.152706	2.10824	0.604518	4.44683	0.166235
	Ga0265800_10856	2778265958		aspartate aminotransferase	0	1.97665	0.731351	1.09478	1.51144	1.04926	2.28279	0.156878
	Ga0265800_108167	2778266069		amino acid/amide ABC transporter substrate-binding protein (HAAT family)	2.86873	3.1516	3.66732	2.2948	3.27742	2.91823	8.32113	0.452319
	Ga0265800_10923	2778266161		nitrite reductase (NO-forming)	3.17751	1.39634	1.02466	2.39573	13.6831	2.99494	22.8136	0.634282
	Ga0265800_109192	2778266328		D-alanine transaminase	0	1.1716	1.44754	1.47084	1.84095	2.10139	2.83275	0.201871
	Ga0265800_11016	2778266375		carbamate kinase	0	9.04508	1.35459	2.79376	2.87124	6.14008	6.60947	0.482381
	Ga0265800_11027	2778266386		alanine-glyoxylate transaminase/serine-glyoxylate transaminase/serine-pyruvate transaminase	8.06742	4.49055	2.41571	4.67317	12.7617	4.68288	11.0003	0.637269
	Ga0265800_11039	2778266398		glutamate dehydrogenase (NAD)	1.2615	4.07452	2.09212	3.58411	5.12741	4.19781	8.96022	0.487557
	Ga0265800_11088	2778266447		amino acid ABC transporter ATP-binding protein (PAAT family)	0	3.90431	1.38138	1.83807	5.07522	3.59988	7.59921	0.414294
	Ga0265800_11089	2778266448		amino acid ABC transporter membrane protein (PAAT family)	0	4.1925	2.19754	1.16962	3.72639	1.73632	5.59777	0.344018
	Ga0265800_11090	2778266449		amino acid ABC transporter substrate-binding protein (PAAT family)	2.33674	3.28597	1.61473	1.41805	2.87501	1.69215	2.71122	0.298626
	Ga0265800_110146	2778266505		ABC-type nitrate/sulfonate/bicarbonate transport system permease component	0	4.99263	1.72718	1.25356	4.19349	1.95887	5.88119	0.3695
	Ga0265800_110199	2778266558		branched-chain amino acid aminotransferase	3.69478	1.46128	1.91486	2.03834	4.87056	3.69483	6.81504	0.426837
	Ga0265800_11135	2778266620		amino acid/amide ABC transporter membrane protein 2 (HAAT family)	6.59147	3.21257	3.85088	3.66944	5.89804	4.29795	8.53913	0.556639
	Ga0265800_11136	2778266621		amino acid/amide ABC transporter membrane protein 1 (HAAT family)	7.67663	4.72282	5.70251	10.7994	16.6973	11.3166	16.1579	0.748557
	Ga0265800_11137	2778266622		amino acid/amide ABC transporter substrate-binding protein (HAAT family)	15.5426	7.17159	7.24961	23.2227	25.4971	21.617	35.9126	0.861238
	Ga0265800_11175	2778266660		amino acid ABC transporter substrate-binding protein (PAAT family)	0	3.34934	1.15211	1.314	1.88386	1.39625	3.68467	0.240295
	Ga0265800_11215	2778266785		dTDP-4-amino-4,6-dideoxygalactose transaminase	0	2.97373	1.07161	2.48883	3.71689	2.52796	4.8233	0.324308
	Ga0265800_11219	2778266789		dTDP-4-amino-4,6-dideoxygalactose transaminase	1.51346	1.99524	0.941242	1.41941	3.05914	2.29632	3.28687	0.274139
	Ga0265800_11239	2778266809		dTDP-4-amino-4,6-dideoxygalactose transaminase	0	2.27576	0.994053	1.0317	2.14917	1.38895	2.73899	0.194704
	Ga0265800_11274	2778266844		amino acid/amide ABC transporter ATP-binding protein 2 (HAAT family)	12.2032	3.43208	5.56553	6.73229	9.22302	8.75279	12.1984	0.690424
	Ga0265800_11275	2778266845		amino acid/amide ABC transporter ATP-binding protein 1 (HAAT family)	4.2881	4.89938	3.55577	4.73132	8.1022	5.84077	9.3765	0.593271
	Ga0265800_11276	2778266846		amino acid/amide ABC transporter membrane protein 2 (HAAT family)	5.78787	6.74011	4.69942	5.98697	8.90136	7.53431	11.1493	0.655982
	Ga0265800_11277	2778266847		amino acid/amide ABC transporter membrane protein 1 (HAAT family)	16.2616	7.78126	4.2451	10.5661	12.2268	12.1497	16.0724	0.762692
	Ga0265800_1135	2778266919		amino acid/amide ABC transporter membrane protein 2 (HAAT family)	0	1.99863	0.967014	0.965035	2.76712	2.59377	1.76939	0.205256
	Ga0265800_1136	2778266920		amino acid/amide ABC transporter membrane protein 1 (HAAT family)	0	1.1671	0.131089	1.04656	1.33373	0.457914	1.41093	0.0883934
	Ga0265800_1137	2778266921		amino acid/amide ABC transporter ATP-binding protein 2 (HAAT family)	0	0.64671	0.847449	0.811886	1.72443	1.01495	1.31346	0.109496
	Ga0265800_1138	2778266922		amino acid/amide ABC transporter ATP-binding protein 1 (HAAT family)	0	0.75375	0.444471	1.30111	0.753693	0.887206	1.02057	0.0784392
	Ga0265800_11353	2778266967		branched-chain amino acid transport system permease protein	5.06832	5.49386	1.16743	2.51649	4.89956	2.15552	4.17167	0.440374
	Ga0265800_11354	2778266968		branched-chain amino acid transport system permease protein	1.95717	2.75221	0.540975	1.18771	5.16001	2.09218	3.95938	0.325105
	Ga0265800_11355	2778266969		amino acid/amide ABC transporter ATP-binding protein 2 (HAAT family)	4.9797	3.7201	1.03232	1.51096	2.62576	1.54545	4.07404	0.362134
	Ga0265800_11356	2778266970		amino acid/amide ABC transporter ATP-binding protein 1 (HAAT family)	0	3.18609	1.00201	1.46661	2.33629	1.83344	3.81065	0.258212
	Ga0265800_11357	2778266971		amino acid/amide ABC transporter substrate-binding protein (HAAT family)	1.27187	3.01815	0.878884	1.96467	3.24147	2.01748	5.37305	0.327095
	Ga0265800_11380	2778266994		urease accessory protein	0	7.58672	5.00288	4.30135	5.139	5.28117	8.86405	0.557635
	Ga0265800_11381	2778266995		urease accessory protein	0	4.64222	4.86653	3.0527	5.74707	3.03564	7.18346	0.480191
	Ga0265800_11382	2778266996		urease accessory protein	3.62154	6.36584	5.00508	2.59731	4.77402	2.49765	4.20191	0.485168
	Ga0265800_11418	2778267093		beta-alanine--pyruvate transaminase	9.67671	11.9066	8.19127	15.8152	38.3747	25.9023	36.3453	0.869799
	Ga0265800_11440	2778267115		branched-subunit amino acid transport protein	6.46306	6.24832	4.01946	2.85243	4.54389	4.23448	5.57603	0.533745
	Ga0265800_11441	2778267116		predicted branched-subunit amino acid permease	2.59446	11.8572	4.48203	6.15465	7.52422	6.08366	12.7356	0.65877
	Ga0265800_11526	2778267176		amino acid/amide ABC transporter ATP-binding protein 2 (HAAT family)	0	0.433292	0	0.135989	0.433259	0.425007	1.10001	0.02827
	Ga0265800_11527	2778267177		amino acid/amide ABC transporter ATP-binding protein 1 (HAAT family)	0	0.806238	0.316948	0.632599	0.403089	0.553576	1.501	0.0597253
	Ga0265800_11528	2778267178		amino acid/amide ABC transporter membrane protein 2 (HAAT family)	0	0.763296	0.840187	0.19165	0.152648	0.299481	0.826798	0.0394187
	Ga0265800_11529	2778267179		amino acid/amide ABC transporter membrane protein 1 (HAAT family)	1.94179	1.02397	0.402541	0.428498	0.511944	0.468714	1.32867	0.100737
	Ga0265800_11530	2778267180		amino acid/amide ABC transporter substrate-binding protein (HAAT family)	0	0.834017	0.749414	0.37394	0.119136	0.420722	0.685617	0.0410113
	Ga0265800_11530	2778267180		amino acid/amide ABC transporter substrate-binding protein (HAAT family)	0	0.834017	0.749414	0.37394	0.119136	0.420722	0.685617	0.0410113
Sulfur Metabolism
	Ga0265800_101592	2778262745		sulfite reductase (NADPH) hemoprotein beta-component	2.61191	7.34582	2.226	3.17006	9.18158	5.40402	21.835	0.661557
	Ga0265800_101593	2778262746		uncharacterized protein DUF934	0	10.2258	4.75086	6.71053	23.2387	11.8539	47.9877	0.819431
	Ga0265800_101594	2778262747		phosphoadenylylsulfate reductase (thioredoxin)	1.97281	9.01613	4.77133	4.35343	17.6841	8.63965	41.5534	0.782401
	Ga0265800_101595	2778262748		sulfate adenylyltransferase subunit 2	5.40079	8.54401	3.98083	5.36311	18.8271	11.4225	35.9374	0.787776
	Ga0265800_101596	2778262749		sulfate adenylyltransferase subunit 1	2.41918	9.88675	4.42997	7.07345	16.7956	13.2222	40.1597	0.797531
	Ga0265800_101610	2778262763		thiosulfate dehydrogenase	1.50289	2.31152	1.09044	0.912026	1.51888	1.50291	3.04036	0.220585
	Ga0265800_102379	2778263729		sulfane dehydrogenase subunit SoxC	1.20369	0.634746	0.249531	0.398433	0.211566	0.124522	0.501341	0.0437985
	Ga0265800_102380	2778263730		sulfur dehydrogenase subunit SoxD	0	0.388341	0	0.0812543	0.647185	0	0.657262	0.0159267
	Ga0265800_102381	2778263731		thiosulfate-binding protein SoxY	0	1.50484	0.887373	2.12534	2.25709	0.885639	2.16489	0.181764
	Ga0265800_102382	2778263732		sulfur compound chelating protein SoxZ	0	1.92957	0.505701	0.807465	1.28628	1.00943	2.83034	0.151105
	Ga0265800_102383	2778263733		diheme cytochrome SoxA (sulfur oxidation)	0	1.1506	0.904648	1.44447	2.10927	0.67716	2.46668	0.159068
	Ga0265800_102384	2778263734		monoheme cytochrome SoxX (sulfur oxidation)	0	1.13416	0.535034	0.711918	1.13408	0.711985	2.45703	0.116464
	Ga0265800_102385	2778263735		sulfate thiol esterase SoxB	0.907418	0.877269	0.564336	0.550665	0.637966	0.375489	0.944853	0.0712721
	Ga0265800_10533	2778265081		dissimilatory sulfite reductase beta subunit	0	0.679656	0.213749	0.682597	0.543684	0.693327	0.690186	0.0467848
	Ga0265800_10534	2778265082		dissimilatory sulfite reductase alpha subunit	0	0.550413	0.346205	0.483696	1.10074	0.302338	1.08062	0.0529564
Other Metabolism
Hydrogen Metabolism
	Ga0265800_105201	2778265249		Ni,Fe-hydrogenase III small subunit	14.7017	8.07571	2.2858	7.09682	10.0131	10.6462	12.1372	0.721282
	Ga0265800_105202	2778265250		Ni,Fe-hydrogenase III large subunit	2.06953	4.63815	3.7182	3.48225	6.36561	4.88845	10.0665	0.546088
Cytoplasmic membrane electron transport
Complex I
	Ga0265800_1011132	2778263285	nuoN	NADH-quinone oxidoreductase, membrane subunit N	2.1413	3.38752	1.40569	2.36262	3.76363	2.25209	3.59927	0.34999
	Ga0265800_1011133	2778263286	nuoM	NADH-quinone oxidoreductase, membrane subunit M	2.17428	2.67533	2.55419	2.39902	3.15282	2.69915	3.46066	0.355564
	Ga0265800_1011134	2778263287	nuoL	NADH-quinone oxidoreductase, membrane subunit L	2.3178	2.5124	2.56261	2.4295	3.19118	2.07805	4.20624	0.35875
	Ga0265800_1011135	2778263288	nuoK	NADH-quinone oxidoreductase, membrane subunit K	14.8536	2.61092	4.61883	2.04861	0	1.2805	5.9656	0.509855
	Ga0265800_1011136	2778263289	nuoJ	NADH-quinone oxidoreductase, membrane subunit J	2.81633	2.97028	3.1138	3.10743	5.1976	2.71925	4.52445	0.426637
	Ga0265800_1011137	2778263290	nuoI	NADH-quinone oxidoreductase, subunit I	10.7076	4.3917	3.20629	2.55978	4.0777	2.83079	5.84014	0.530958
	Ga0265800_1011138	2778263291	nuoH	NADH-quinone oxidoreductase, subunit H	7.66119	5.38665	3.81168	3.21216	5.38625	3.48721	5.60687	0.53912
	Ga0265800_1011139	2778263292	nuoG	NADH-quinone oxidoreductase, subunit G	11.6854	9.69243	6.25795	6.72864	6.61089	7.83234	13.2538	0.707346
	Ga0265800_1011140	2778263293	nuoF	NADH-quinone oxidoreductase, subunit F	12.9565	19.4619	8.62758	10.072	8.28104	8.69195	14.8576	0.772049
	Ga0265800_1011141	2778263294	nuoE	NADH-quinone oxidoreductase, subunit E	14.1744	20.8667	7.10119	8.21074	10.2768	8.92024	15.8134	0.775433
	Ga0265800_1011142	2778263295	nuoD	NADH-quinone oxidoreductase, subunit D	27.1995	30.5077	13.6937	16.9347	12.8624	15.8108	21.1931	0.862831
	Ga0265800_1011143	2778263296	nuoC	NADH-quinone oxidoreductase, subunit C	47.4984	51.1384	19.0778	23.0922	26.6108	21.9069	36.3869	0.914195
	Ga0265800_1011144	2778263297	nuoB	NADH-quinone oxidoreductase, subunit B	56.0426	74.938	24.0656	38.8678	43.6226	36.1659	54.7818	0.942465
	Ga0265800_1011145	2778263298	nuoA	NADH-quinone oxidoreductase, membrane subunit A	62.7913	78.1807	36.5197	46.1876	50.5837	62.0704	62.5796	0.955007
Complex III
	Ga0265800_103342	2778264458		quinol-cytochrome c reductase cytochrome c1 subunit	9.13102	8.82764	4.41677	8.31172	7.02145	10.4693	11.9526	0.700378
	Ga0265800_103343	2778264459		quinol-cytochrome c reductase cytochrome b subunit	5.54554	8.48059	3.83205	7.83198	13.0611	9.2937	14.1553	0.708342
	Ga0265800_103344	2778264460		quinol-cytochrome c reductase iron-sulfur subunit	9.12529	16.5749	8.828	9.56507	14.7024	16.2579	28.7767	0.817838
	Ga0265800_105167	2778265215		hypothetical protein	10.4241	0.916161	2.16097	5.1757	8.24483	3.95403	9.30356	0.588692
	Ga0265800_105168	2778265216		cytoplasmic membrane tetraheme cytochrome c	0	1.87135	1.89171	2.18151	4.54437	1.99291	3.8007	0.302807
	Ga0265800_105169	2778265217		cytoplasmic membrane tetraheme cytochrome c	2.88205	1.7731	0.995771	2.06696	2.02624	1.6895	4.02984	0.289468
	Ga0265800_105170	2778265218		periplasmic monoheme cytochrome c	0	0.591115	0.464758	2.22627	6.50177	1.39155	9.60437	0.378857
	Ga0265800_105171	2778265219		cytoplasmic membrane cytochrome bc	0.768991	1.89239	0.956491	1.27271	11.2859	1.538	23.1521	0.593868
	Ga0265800_105172	2778265220		LuxR family two component transcriptional regulator	2.75354	0.968018	0.570821	0.911444	13.0673	1.13941	22.4455	0.598447
	Ga0265800_105224	2778265272		cytoplasmic membrane cytochrome b	5.30027	9.06471	4.57105	4.08761	6.70357	3.9399	8.93589	0.604619
	Ga0265800_105225	2778265273		cytoplasmic membrane nonaheme cytochrome c	1.18635	6.67307	2.21342	2.87974	4.90016	3.15001	8.61175	0.492136
	Ga0265800_105226	2778265274		response regulator receiver domain-containing protein	2.42865	3.20176	1.51041	1.60781	3.62838	3.09866	5.56345	0.381445
	Ga0265800_105227	2778265275		response regulator receiver domain-containing protein	4.06898	5.72188	2.53056	1.34687	3.21831	2.80624	3.63158	0.4131
	Ga0265800_107221	2778265880		response regulator receiver domain-containing protein	0	1.19052	0	1.24549	1.58724	1.40131	1.47763	0.120048
	Ga0265800_107222	2778265881		response regulator receiver domain-containing protein	0	2.13869	1.05095	0.503425	2.40585	0.839119	3.43873	0.191519
	Ga0265800_107223	2778265882		cytoplasmic membrane nonaheme cytochrome c	0	3.17134	0.4826	0.834794	2.76193	1.72594	3.08196	0.225961
	Ga0265800_107224	2778265883		cytoplasmic membrane cytochrome b	0	1.2367	1.72954	1.07565	2.97288	1.89887	1.04295	0.183556
	Ga0265800_107225	2778265884		hypothetical protein	0	3.27958	3.8678	2.0586	2.4595	6.43373	7.21584	0.438583
Complex IV
	Ga0265800_1011027	2778263180		cytochrome bd oxidase subunit I	0	2.76214	1.2065	1.02744	1.6367	1.24428	2.32013	0.186741
	Ga0265800_1011028	2778263181		cytochrome bd oxidase subunit II	1.62284	2.99522	1.23355	1.52199	4.13594	2.51824	5.55217	0.36313
	Ga0265800_101264	2778262417		membrane cytochrome b with 2Fe-2S and FAD/NAD-binding domains	0.821415	0.93851	0.681132	0.589106	1.44375	0.453201	2.07716	0.121441
	Ga0265800_101265	2778262418		cytochrome c oxidase subunit I	0	0.583558	0.229408	0.793654	1.55604	0.49608	1.97533	0.0895879
	Ga0265800_101266	2778262419		hypothetical protein	0	0.332937	0.523536	0.417971	2.33038	0.391885	3.83174	0.139757
	Ga0265800_101267	2778262420		membrane cytochrome b	0	0.183039	0.719561	0.517023	3.01991	0.287262	4.8947	0.177981
	Ga0265800_101268	2778262421		copper chaperone protein SCO1/2	0	0.530759	0.834608	2.77633	8.66841	0.624733	22.8169	0.55863
	Ga0265800_101269	2778262422		protoheme IX farnesyltransferase	0	0.65932	1.94394	4.6559	24.2282	2.00481	49.3224	0.771053
	Ga0265800_101270	2778262423		cytochrome c oxidase subunit I	0	0.481162	1.38713	2.11419	32.5562	0.755139	43.134	0.765479
	Ga0265800_101271	2778262424		cytochrome c oxidase subunit II	0	0.908267	1.66627	1.14025	20.8886	0.593934	43.4524	0.736413
	Ga0265800_101272	2778262425		hypothetical protein	0	3.65513	1.4369	4.58867	51.1679	1.43409	68.6675	0.856062
	Ga0265800_102413	2778263763		hypothetical protein	8.01832	5.63775	2.77039	5.75062	18.3213	9.67742	14.5513	0.720486
	Ga0265800_102414	2778263764		hypothetical protein	0	4.32903	1.36146	5.4347	7.79167	4.75581	13.1883	0.564404
	Ga0265800_102415	2778263765		cytochrome c oxidase accessory protein FixG	1.11916	2.36067	1.46938	3.21058	9.34362	1.54369	12.9185	0.514434
	Ga0265800_102416	2778263766		cytochrome c oxidase subunit 3	1.82689	0.963378	2.27234	4.83773	32.9129	4.03182	51.1979	0.805893
	Ga0265800_102417	2778263767		cytochrome c oxidase subunit 4	0	0	1.63123	2.60463	31.1185	3.25609	67.4198	0.821621
	Ga0265800_102418	2778263768		cytochrome c oxidase subunit 2	2.86534	0.755491	2.57399	4.90032	24.9293	1.48209	65.8084	0.817042
	Ga0265800_102419	2778263769		cytochrome c oxidase subunit 1	1.11916	0.885252	2.78408	3.33406	27.1457	1.38932	42.0184	0.761099
	Ga0265800_102420	2778263770		cbb3-type cytochrome oxidase maturation protein	0	0	1.67407	4.00954	8.51618	0	7.92805	0.394386
	Ga0265800_102421	2778263771		Cu2+-exporting ATPase	0.664515	0.934453	1.60716	1.4664	17.9285	1.90191	41.5355	0.726259
	Ga0265800_105284	2778265332		cytochrome c oxidase subunit 2 with 2 heme c binding sites	4.7683	6.18143	2.14173	5.06387	7.54286	6.24821	10.7812	0.605017
	Ga0265800_105285	2778265333		cytochrome c oxidase subunit 1	3.50727	3.00543	1.03002	1.20931	2.61992	1.72342	3.96498	0.314752
	Ga0265800_105286	2778265334		cytochrome c oxidase subunit 3	0	2.22189	0.87347	1.11575	2.88824	2.35376	5.86643	0.286681
	Ga0265800_105287	2778265335		cytochrome c oxidase subunit 3	0	1.49415	0.839116	1.87577	2.98808	2.42868	4.33515	0.265379
	Ga0265800_105288	2778265336		cytochrome c oxidase subunit IV	0	2.27534	1.43117	2.28518	5.4604	2.85675	8.01005	0.397372
	Ga0265800_105289	2778265337		membrane hypothetical protein	3.64829	3.20643	1.26051	2.61649	1.92371	2.13868	7.0549	0.390802
	Ga0265800_10763	2778265722		cytochrome c oxidase subunit 3	7.67663	5.56618	4.24373	8.36421	10.2882	9.00031	9.19232	0.674696
	Ga0265800_10764	2778265723		membrane hypothetical protein	54.4986	15.5669	7.53187	12.0263	15.5657	15.5041	12.5654	0.859048
	Ga0265800_10765	2778265724		cytochrome c oxidase assembly protein subunit 11	6.39872	13.7782	6.19026	17.1207	17.1511	30.1185	22.9387	0.83476
	Ga0265800_10766	2778265725		membrane hypothetical protein	0	8.97562	5.29274	14.0851	17.9499	14.9668	21.2676	0.770456
	Ga0265800_10767	2778265726		cytochrome c oxidase subunit 1	5.73972	10.5095	5.35441	15.7269	15.721	19.9903	17.901	0.792952
	Ga0265800_10768	2778265727		cytochrome c oxidase subunit 2 with 1 heme c binding site	4.22941	12.1427	6.42968	19.5218	17.9649	25.231	24.6618	0.828788
	Ga0265800_10878	2778265980		membrane hypothetical protein	6.00952	15.3169	7.26717	15.2505	16.6361	13.4698	32.8069	0.823213
	Ga0265800_10879	2778265981		copper chaperon protein SCO1/2	11.5282	9.11878	7.96616	11.4478	13.6771	11.429	20.8352	0.776628
	Ga0265800_10880	2778265982		helix-turn-helix protein	8.56106	9.02903	6.5074	11.099	5.26654	10.0372	20.3754	0.742385
	Ga0265800_10881	2778265983		monoheme cytochrome c	5.69762	8.76323	4.33086	7.85817	8.51221	6.87654	11.7806	0.672108
	Ga0265800_10882	2778265984		monoheme cytochrome c	3.00476	8.4507	3.94504	10.2775	8.45006	5.69877	9.65433	0.646426
	Ga0265800_10883	2778265985		cytochrome c oxidase subunit 1	2.88102	9.28431	3.98165	9.43044	6.58292	6.88804	9.08532	0.637866
	Ga0265800_10884	2778265986		globin	5.17778	15.0172	3.93571	13.1398	9.10066	11.0699	18.0226	0.753534
	Ga0265800_11148	2778266633		cytochrome c oxidase subunit 2 with 1 heme c binding site	0	2.22724	0.700458	1.58445	2.37554	1.57295	3.41775	0.220386
	Ga0265800_11149	2778266634		cation:H+ antiporter	0	1.52387	0.653523	0.695664	1.66228	1.03272	2.57913	0.147123
	Ga0265800_11150	2778266635		cytochrome c oxidase subunit I+III	0.608076	1.17574	0.462208	0.469649	1.17566	0.629053	1.70049	0.104718
	Ga0265800_11151	2778266636		membrane hypothetical protein	6.37991	1.12144	0.440861	0.703934	0	1.1	2.46744	0.229146
Other terminal oxidase
	Ga0265800_10510	2778265058		membrane attachment protein of the CISM protein family	1.78724	5.02648	1.85251	16.2687	9.73808	27.4252	19.4072	0.768266
	Ga0265800_10511	2778265059		iron-sulfur subunit of the CISM protein family	4.93001	2.59975	2.3847	7.20744	6.49888	12.7502	9.46011	0.625523
	Ga0265800_10512	2778265060		catalytic subunit of the CISM protein family	2.11927	0.698473	1.09833	1.84142	2.18838	2.02795	2.80566	0.240096
	Ga0265800_11155	2778266640		catalytic subunit of the CISM protein family	1.21019	0.638173	1.12895	1.6691	4.83911	2.39955	4.37441	0.302409
	Ga0265800_11156	2778266641		iron-sulfur subunit of the CISM protein family	4.42246	0.388684	0.916796	0.243978	1.36029	0.991255	3.22343	0.214414
	Ga0265800_11157	2778266642		TorA maturation chaperone TorD	0	2.22771	0.973063	3.10743	2.97005	1.74809	4.60824	0.293052
Complex V
	Ga0265800_109183	2778266319		ATP synthase F1 subcomplex epsilon subunit	13.9277	14.6891	5.77456	11.2694	10.608	7.36418	13.1211	0.756918
	Ga0265800_109184	2778266320		ATP synthase F1 subcomplex beta subunit	16.8638	16.9952	7.5357	12.4046	12.449	11.0489	15.2851	0.796337
	Ga0265800_109185	2778266321		ATP synthase F1 subcomplex gamma subunit	25.4433	18.0614	7.70889	15.5482	14.276	15.3877	17.4096	0.835357
	Ga0265800_109186	2778266322		ATP synthase F1 subcomplex alpha subunit	16.4187	26.4252	10.7783	21.4558	18.2167	21.8683	26.9263	0.866614
	Ga0265800_109187	2778266323		ATP synthase F1 subcomplex delta subunit	3.51837	35.2516	11.67	24.845	19.1705	18.1987	39.3566	0.873183
	Ga0265800_109188	2778266324		F-type H+-transporting ATPase subunit b	30.5395	44.9583	14.5085	24.8509	22.8129	23.6948	38.6135	0.90444
	Ga0265800_109189	2778266325		ATP synthase F0 subcomplex C subunit	28.4928	55.927	15.0949	33.5337	59.2614	35.3709	59.3365	0.932112
	Ga0265800_109190	2778266326		F-type H+-transporting ATPase subunit a	11.8843	23.6752	8.89658	22.8379	20.7142	20.2172	22.6278	0.855664
	Ga0265800_109191	2778266327		ATP synthase protein I	21.4153	31.3693	15.2915	18.1154	29.1712	36.0618	20.3874	0.88911
Extracellular Electron Transfer
	Ga0265800_106152	2778265504		hypothetical protein	5.34582	7.98723	2.95523	8.25772	11.2752	19.1715	25.2872	0.765081
	Ga0265800_106153	2778265505		hypothetical protein	53.1126	4.66799	3.05847	7.3253	9.33528	11.5995	13.6943	0.816046
	Ga0265800_106154	2778265506		outer membrane protein TolC	3.41945	3.70655	1.10268	3.20696	2.90491	4.99168	6.74803	0.446347
	Ga0265800_106155	2778265507		putative multicopper oxidase	1.15853	2.34189	1.2809	1.4061	1.83265	2.58614	2.95592	0.25642
	Ga0265800_106156	2778265508		uncharacterized cupredoxin-like copper-binding protein	7.19037	3.15976	1.4906	1.98339	0.947855	2.72742	2.03219	0.362731
	Ga0265800_106157	2778265509		hypothetical protein	19.0872	23.8212	7.91372	22.1131	19.412	28.0388	35.7605	0.876369
	Ga0265800_106158	2778265510		Cu/Ag efflux protein CusF	71.0654	45.2823	13.0953	29.0773	48.4016	51.2577	105.71	0.948636
	Ga0265800_106159	2778265511		winged helix family two component heavy metal response transcriptional regulator	20.8653	24.7566	7.02889	19.7125	22.921	22.9342	67.5836	0.897273
	Ga0265800_106160	2778265512		two-component system heavy metal sensor histidine kinase CusS	12.2829	12.8562	5.40125	6.46824	8.73371	6.8924	19.8655	0.746765
	Ga0265800_106161	2778265513		hypothetical protein	13.5211	5.73522	2.23976	3.75193	4.05726	6.00788	8.83824	0.614374
	Ga0265800_106237	2778265589		hypothetical protein	0	8.85752	1.30578	1.38998	3.87487	1.95484	4.49738	0.391599
	Ga0265800_106238	2778265590		outer membrane protein TolC	1.13982	3.10549	1.02392	1.19475	0.901524	0.904006	1.89894	0.186144
	Ga0265800_106239	2778265591		putative multicopper oxidase	2.32798	1.12531	0.402167	0.38529	1.12523	0.933824	1.32412	0.134382
	Ga0265800_106240	2778265592		uncharacterized cupredoxin-like copper-binding protein	0	1.59146	1.00102	0.799173	1.59134	1.24882	1.18515	0.130201
	Ga0265800_106241	2778265593		hypothetical protein	0	0.676245	1.06338	1.48569	3.08929	1.19397	4.93539	0.232729
	Ga0265800_106242	2778265594		copper binding protein CusF	0	5.72535	0.409227	6.20752	8.32715	4.69692	12.8614	0.575552
	Ga0265800_106243	2778265595		two-component system copper resistance phosphate regulon response regulator CusR	0	3.64838	2.15138	2.86263	7.0682	3.75755	12.6584	0.515827
	Ga0265800_106244	2778265596		uncharacterized protein DUF326	0	7.48184	4.52501	3.97386	4.60386	4.06456	14.8059	0.585308
	Ga0265800_106245	2778265597		Ca2+-binding RTX toxin-like protein	4.26411	15.6465	3.38855	7.35133	10.68	5.51402	18.553	0.723671
	Ga0265800_106276	2778265628		thiol:disulfide interchange protein DsbD	1.62126	1.5674	0.504143	1.6994	1.4248	1.84491	1.97754	0.197292
	Ga0265800_106277	2778265629		putative multicopper oxidase	3.00973	4.49686	1.59449	6.14352	4.84919	7.40336	6.11856	0.531157
	Ga0265800_106278	2778265630		hypothetical protein	0	4.99873	0	7.8443	4.99835	5.88378	2.53809	0.448537
	Ga0265800_106279	2778265631		hypothetical protein	1.86835	5.91144	1.67837	10.6165	5.74679	15.0759	8.22637	0.643838
	Ga0265800_106280	2778265632		protein SCO1/2	0	7.30308	2.17799	18.969	9.06521	13.1412	12.9571	0.714911
	Ga0265800_106281	2778265633		hypothetical protein	4.10278	5.7694	4.25262	14.7122	13.7013	16.6943	17.5764	0.757515
	Ga0265800_109149	2778266285		putative multicopper oxidase	4.49701	3.16189	1.55375	2.10878	3.35925	3.21774	5.31802	0.41091
	Ga0265800_109150	2778266286		2,4-dihydroxyhept-2-enedioate aldolase	0	1.56173	1.38138	1.9606	2.34241	2.37439	3.10577	0.238503
	Ga0265800_109151	2778266287		altronate hydrolase	0	1.28942	0.289656	1.3875	1.10514	1.44545	2.08881	0.133984
	Ga0265800_109152	2778266288		tripartite-type tricarboxylate transporter receptor subunit TctC	3.35593	1.03232	0.2319	1.38855	1.1797	1.38868	1.59743	0.186343
	Ga0265800_10194	2778262247		hypothetical protein	47.8715	37.8663	17.6426	29.9311	32.254	17.0579	71.6839	0.923552
	Ga0265800_10195	2778262248		putative multicopper oxidase	20.747	21.4013	14.7138	9.39754	29.4605	5.27155	58.8963	0.879952
	Ga0265800_103135	2778264251	mtrC-like	decaheme cytochrome c	0.598499	3.78729	0.909858	1.41977	1.63259	1.42403	3.1343	0.241887
	Ga0265800_103440	2778264556	mtrC-like	decaheme cytochrome c	0.564315	0.694356	0.38995	1.05849	0.991862	0.875673	1.746	0.108103
	Ga0265800_104312	2778264950		undecaheme cytochrome c	0	0.484565	0.507979	1.08147	5.54516	0.38024	9.82323	0.32829
	Ga0265800_104211	2778264849		putative two-compenent system sensor	0	1.98069	1.16797	1.18112	3.96108	1.59311	5.53129	0.28907
	Ga0265800_104212	2778264850		putative two-compenent system regulator	1.14776	3.32888	1.26899	1.70963	3.7321	3.00797	4.06338	0.337249
	Ga0265800_104213	2778264851		hypothetical protein	0	3.11065	1.39755	2.37097	3.11041	1.56917	1.88026	0.254031
	Ga0265800_104214	2778264852		hypothetical protein potentially involved in protein binding/interaction	0	5.14551	0	1.61493	1.92942	2.77592	3.48349	0.280908
	Ga0265800_104215	2778264853		decaheme cytochrome c	0	2.19552	0.97099	1.63654	2.46977	2.20738	2.78692	0.230739
	Ga0265800_104216	2778264854		hypothetical protein potentially involved in protein binding/interaction	2.05487	3.43139	1.13595	2.26726	2.88937	2.76348	2.38417	0.312363
	Ga0265800_104217	2778264855		tetraheme cytochrome c	0	1.51652	1.02201	1.35989	1.29978	1.36002	2.42003	0.165439
	Ga0265800_104218	2778264856		hypothetical protein potentially involved in protein binding/interaction	2.84395	2.49951	0.982607	2.27498	2.37436	2.59882	2.53824	0.301214
	Ga0265800_104219	2778264857		putative outer membrane β-barrel porin	1.5214	2.07257	0.893616	1.25899	1.805	1.75751	3.23623	0.234919
	Ga0265800_104220	2778264858		cytoplasmic membrane beta-propeller protein	0	1.81834	0.879786	1.40478	1.11889	1.3171	1.4204	0.141748
	Ga0265800_104221	2778264859		didecaheme cytochrome c	0.872173	1.60974	0.482148	1.05855	1.53297	0.661658	1.79036	0.142942
	Ga0265800_104222	2778264860		heptaheme cytochrome c	0	1.50227	1.77171	0.785817	1.50215	1.57178	2.11881	0.170615
	Ga0265800_104223	2778264861		CBS domain-containing protein	0	1.12803	0.689811	0.786741	1.50392	1.08187	1.06065	0.105515
	Ga0265800_104224	2778264862		cyclic nucleotide-binding domain-containing protein	2.91608	2.05032	0.604516	0.482623	0.512541	1.30723	1.38806	0.170814
	Ga0265800_105163	2778265211	mtrB-like	outer membrane β-barrel porin	1.40661	3.33787	4.27674	10.2432	27.5662	9.70087	63.9627	0.842923
	Ga0265800_105164	2778265212	mtrA-like	periplasmic decaheme cytochrome c	3.42575	3.01084	7.8119	11.3395	50.5783	8.09196	127.905	0.909218
	Ga0265800_105165	2778265213	mtrC-like	decaheme cytochrome c	0.59418	3.34218	7.18527	11.6368	59.7684	10.3471	143.409	0.917977
	Ga0265800_105166	2778265214	mtrC-like	decaheme cytochrome c	2.94961	0.725864	3.38345	6.11843	39.6789	4.55671	99.1097	0.876568
