# Supplementary material for: Bacterial chemolithoautotrophy via manganese oxidation
Source: Springer Nature journal article supplement (doi:10.1038/s41586-020-2468-5), 2020-07-15
Supplement: MOESM8 [file 41586_2020_2468_MOESM8_ESM.xlsx]

## Sheet: a
Time (day)	Mn(II) oxidised (µmol⋅ml-1)
0	1.22221
1	1.76425
2	0.957279
3	0.959598
4	0.475758
5	2.27016
6	2.35484
7	1.81053
8	2.41763
9	2.27061
10	4.48156
11	4.36284
12	6.84118
13	6.89211
14	6.8187
15	10.5141
16	9.21321
17	11.0849
18	12.5703
19	12.6626
20	17.4955
21	15.5331
22	18.1994
23	19.5204
24	22.3015
25	26.2266
26	26.6954
27	28.9198
28	31.1785
29	32.1971
30	36.7651
31	34.0542
32	34.9259
33	39.3148
34	43.7604
35	49.5045
36	50.6335
37	55.1877
40	39.9973
42	72.3985
67	72.9875
Note: Data for days 0-25 and days 26-42 were used for exponential line fits for phase 1 and 2, respectively, excluding days 4 and 40. Data for days 2-3 were included the exponential line fit, however fell just below the x-axis and were not plotted.

## Sheet: b
Time (day)	Species A Cells (genome equiv.⋅ml-1)	Time (day)	Species B Cells (genome equiv.⋅ml-1)
0	463065	0	121576
0	476049	0	111151
0	419614	0	137420
12	2.60506e+06	1	289093
12	1.24607e+06	1	299124
12	2.38942e+06	1	278250
14	1.92089e+06	3	201419
14	916874	3	210197
14	2.0159e+06	3	162424
15	4.37885e+06	4	381297
15	4.28374e+06	4	370584
15	4.2301e+06	4	420985
16	7.13656e+06	5	570722
16	5.03054e+06	5	541356
16	6.43938e+06	5	561686
17	5.07425e+06	6	336713
17	1.03504e+06	6	309689
17	4.78376e+06	6	212622
18	2.65299e+06	7	377169
18	885766	7	378408
18	2.7282e+06	7	298092
19	4.4751e+06	8	497079
19	3.02602e+06	8	483804
19	4.44524e+06	8	321940
20	3.63658e+06	9	368403
20	3.57537e+06	9	365655
20	3.49104e+06	9	209265
21	8.57645e+06	10	262469
21	8.38624e+06	10	257757
21	8.66749e+06	10	263373
22	1.03015e+07	11	653884
22	8.27076e+06	11	682369
22	1.082e+07	11	339742
23	5.12944e+06	12	1.22514e+06
23	3.10931e+06	12	1.13551e+06
23	4.58343e+06	12	634219
24	7.89709e+06	13	751143
24	8.88075e+06	13	788487
24	4.65305e+06	13	444888
25	1.08e+07	14	785118
25	1.12848e+07	14	742554
25	1.04287e+07	14	420003
26	8.44231e+06	15	1.35593e+06
26	7.91421e+06	15	1.42396e+06
26	6.31104e+06	15	1.43629e+06
28	1.53121e+07	16	1.82001e+06
28	1.72051e+07	16	1.98832e+06
28	1.01249e+07	16	1.64032e+06
30	2.17827e+07	17	1.48362e+06
30	2.02137e+07	17	1.56105e+06
30	2.17099e+07	17	320832
31	1.65573e+07	18	793850
31	1.78026e+07	18	794357
31	9.39544e+06	18	278011
33	2.42137e+07	19	1.28502e+06
33	2.41952e+07	19	1.28722e+06
33	1.17881e+07	19	966488
35	2.58209e+07	20	770316
35	2.61436e+07	20	772454
35	2.64025e+07	20	811703
36	3.05671e+07	21	2.30197e+06
36	3.67062e+07	21	2.27321e+06
36	2.74127e+07	21	2.56179e+06
37	2.80688e+07	22	2.71919e+06
37	3.23668e+07	22	2.66682e+06
37	1.76031e+07	22	2.25092e+06
40	4.65977e+07	23	1.01783e+06
40	4.76198e+07	23	1.18029e+06
40	4.4789e+07	23	773891
42	2.3584e+07	24	1.90411e+06
42	2.52149e+07	24	2.19559e+06
42	1.56419e+07	24	1.10124e+06
67	2.44291e+07	25	2.7329e+06
67	2.64596e+07	25	2.63774e+06
67	2.42705e+07	25	2.4882e+06
		26	1.59507e+06
		26	1.67481e+06
		26	1.29118e+06
		28	3.69705e+06
		28	3.39319e+06
		28	2.31796e+06
		30	3.95739e+06
		30	4.0903e+06
		30	4.09272e+06
		31	3.29047e+06
		31	2.79473e+06
		31	1.81606e+06
		33	4.03252e+06
		33	3.72624e+06
		33	1.89604e+06
		35	5.72565e+06
		35	5.50219e+06
		35	6.03667e+06
		36	5.68252e+06
		36	4.75048e+06
		36	4.99566e+06
		37	5.53912e+06
		37	4.75123e+06
		37	3.29012e+06
		40	7.85468e+06
		40	7.75608e+06
		40	7.49827e+06
		42	3.71999e+06
		42	3.43206e+06
		42	2.4865e+06
		67	4.97483e+06
		67	5.54859e+06
		67	5.08828e+06
Note: days 0-40 were used for exponential line fits for both Species A and Species B

## Sheet: c
Mn(II) oxidised (µmol⋅ml-1)	Species A Cells (genome equiv.⋅ml-1)	Mn(II) oxidised (µmol⋅ml-1)	Species B Cells (genome equiv.⋅ml-1)	*note: the values in each column are normalised to the lowest value at the start of the experiment
0	43450.2	0	10425.4
0	56434.3	0	0
0	0	0	26269.2
5.61897	2.18544e+06	0.542036	177942
5.61897	826452	0.542036	187973
5.61897	1.9698e+06	0.542036	167099
5.59649	1.50128e+06	-0.262613	90268.3
5.59649	497260	-0.262613	99046.3
5.59649	1.59629e+06	-0.262613	51272.9
9.29191	3.95924e+06	-0.746452	270146
9.29191	3.86413e+06	-0.746452	259433
9.29191	3.81049e+06	-0.746452	309835
7.991	6.71694e+06	1.04795	459571
7.991	4.61092e+06	1.04795	430205
7.991	6.01977e+06	1.04795	450536
9.8627	4.65464e+06	1.13263	225562
9.8627	615421	1.13263	198538
9.8627	4.36415e+06	1.13263	101471
11.3481	2.23337e+06	0.58832	266018
11.3481	466151	0.58832	267258
11.3481	2.30859e+06	0.58832	186941
11.4404	4.05549e+06	1.19542	385928
11.4404	2.60641e+06	1.19542	372653
11.4404	4.02562e+06	1.19542	210789
16.2732	3.21696e+06	1.0484	257252
16.2732	3.15576e+06	1.0484	254504
16.2732	3.07142e+06	1.0484	98114.4
14.3109	8.15684e+06	3.25935	151318
14.3109	7.96662e+06	3.25935	146607
14.3109	8.24788e+06	3.25935	152222
16.9772	9.8819e+06	3.14063	542734
16.9772	7.85114e+06	3.14063	571218
16.9772	1.04004e+07	3.14063	228591
18.2982	4.70983e+06	5.61897	1.11399e+06
18.2982	2.6897e+06	5.61897	1.02436e+06
18.2982	4.16382e+06	5.61897	523069
21.0793	7.47747e+06	5.6699	639992
21.0793	8.46114e+06	5.6699	677336
21.0793	4.23344e+06	5.6699	333737
25.0043	1.03803e+07	5.59649	673967
25.0043	1.08652e+07	5.59649	631403
25.0043	1.0009e+07	5.59649	308852
25.4732	8.02269e+06	9.29191	1.24478e+06
25.4732	7.49459e+06	9.29191	1.31281e+06
25.4732	5.89142e+06	9.29191	1.32514e+06
29.9563	1.48925e+07	7.991	1.70886e+06
29.9563	1.67854e+07	7.991	1.87717e+06
29.9563	9.70525e+06	7.991	1.52917e+06
35.5429	2.13631e+07	9.8627	1.37247e+06
35.5429	1.97941e+07	9.8627	1.4499e+06
35.5429	2.12903e+07	9.8627	209682
32.8319	1.61377e+07	11.3481	682699
32.8319	1.7383e+07	11.3481	683206
32.8319	8.97583e+06	11.3481	166860
38.0926	2.37941e+07	11.4404	1.17387e+06
38.0926	2.37755e+07	11.4404	1.17607e+06
38.0926	1.13685e+07	11.4404	855337
48.2823	2.54012e+07	16.2732	659165
48.2823	2.5724e+07	16.2732	661304
48.2823	2.59829e+07	16.2732	700552
49.4113	3.01475e+07	14.3109	2.19081e+06
49.4113	3.62866e+07	14.3109	2.16206e+06
49.4113	2.6993e+07	14.3109	2.45064e+06
53.9655	2.76492e+07	16.9772	2.60804e+06
53.9655	3.19472e+07	16.9772	2.55567e+06
53.9655	1.71835e+07	16.9772	2.13977e+06
38.7751	4.61781e+07	18.2982	906676
38.7751	4.72001e+07	18.2982	1.06914e+06
38.7751	4.43694e+07	18.2982	662740
		21.0793	1.79296e+06
		21.0793	2.08444e+06
		21.0793	990090
		25.0043	2.62175e+06
		25.0043	2.52659e+06
		25.0043	2.37705e+06
		25.4732	1.48392e+06
		25.4732	1.56366e+06
		25.4732	1.18002e+06
		29.9563	3.5859e+06
		29.9563	3.28204e+06
		29.9563	2.20681e+06
		35.5429	3.84624e+06
		35.5429	3.97915e+06
		35.5429	3.98157e+06
		32.8319	3.17932e+06
		32.8319	2.68358e+06
		32.8319	1.70491e+06
		38.0926	3.92136e+06
		38.0926	3.61509e+06
		38.0926	1.78489e+06
		48.2823	5.6145e+06
		48.2823	5.39104e+06
		48.2823	5.92552e+06
		49.4113	5.57137e+06
		49.4113	4.63933e+06
		49.4113	4.88451e+06
		53.9655	5.42797e+06
		53.9655	4.64008e+06
		53.9655	3.17897e+06
		38.7751	7.74352e+06
		38.7751	7.64493e+06
		38.7751	7.38712e+06
