# Supplementary material for: Bacterial chemolithoautotrophy via manganese oxidation
Source: Springer Nature journal article supplement (doi:10.1038/s41586-020-2468-5), 2020-07-15
Supplement: MOESM9 [file 41586_2020_2468_MOESM9_ESM.xlsx]

## Sheet: a
Temperature	Mn(II) oxidised (µmol⋅ml-1)	*note: the values for Mn(II) oxidised are substracted by the starting amount Mn(II) oxidised, as noted in the methods
37	7.8
37	13.2
37	8
37	6.6
37	7
37	4.8
37	2.7
37	7.1
40	6.5
40	7.5
40	6.6
40	10.6
40	8.7
40	7.3
40	5.3
34	8
34	8.1
34	7.5
34	8.6
32	5.3
32	5.2
32	5.3
32	2.4
31	2.1
31	5.4
31	7.1
31	4.2
28.5	5
28.5	2.2
28.5	5.9
28.5	2
28	2
28	3.5
28	3.9
42	3.6
42	5.6
42	1.8
44	0
44	3.2
44	0.1
50	2
50	1.1
50	1.2
20	1.5
20	1
20	2.9
18	1.2
18	2
18	2.1
13	3.6
13	0.7
13	4.3

## Sheet: b
Condition	Mn(II) oxidized mean subtracted	*note: the values for Mn(II) oxidised are substracted by the starting amount Mn(II) oxidised, which is assumed to be lowest value measured as noted in the methods
Kanamycin	1.1
Kanamycin	1
Vancomycin	0.1
Vancomycin	1.4
50 °C Overnight	0.3
50 °C Overnight	0

## Sheet: c
	Mn(II) oxidised (µmol⋅ml-1)				*note: the values for Mn(II) oxidised are substracted by the starting amount Mn(II) oxidised, as noted in the methods
Time (day)	0.5 mM MnCl2 added	2.0 mM MnCl2 added	5.0 mM MnCl2 added	20.0 mM MnCl2 added
0	0.0956782	0.247929	0.412604	0.253094
5	0.718039	1.15885	0.429379	0.357279
10	2.1913	1.92206	1.16653	0.242849
0	0	0.550092	0.332001	0.220859
5	1.67905	1.60168	0.516223	0.392313
10	1.11891	3.62779	0.832616	0.780785
0	0.0887665	0.057194	0.22136	0.193325
5	1.82893	0.774308	0.876993	0.131799
10	2.54581	1.2335	1.13256	0.352824
