# Supplementary material for: Bacterial chemolithoautotrophy via manganese oxidation
Source: Springer Nature journal article supplement (doi:10.1038/s41586-020-2468-5), 2020-07-15
Supplement: MOESM10 [file 41586_2020_2468_MOESM10_ESM.xlsx]

## Sheet: a
Time (day)	DNA yield (ng DNA / ml culture)
0	16.7
0	7
0	14.5
0	9.45
10	2.29
10	6.25
10	6.4
21	1.35
21	2.18
21	8.4
21	14.1

## Sheet: b
Time (day)	All bacteria (16S rRNA gene copies ⋅ml-1)
0	468966
16	6.10065e+06
21	7.13864e+06
22	8.34359e+06
24	7.30238e+06
25	9.92919e+06
26	6.39204e+06
28	1.39131e+07
30	1.91355e+07
31	1.36252e+07
33	1.74429e+07
35	2.42268e+07
36	2.77699e+07
37	2.51447e+07
40	4.65028e+07
42	1.80289e+07
67	2.22099e+07
0	410382
16	5.2915e+06
21	7.1342e+06
22	8.58103e+06
24	6.59241e+06
25	9.64487e+06
26	6.64648e+06
28	1.26369e+07
30	2.00286e+07
31	1.22623e+07
33	1.74279e+07
35	2.36023e+07
36	2.39128e+07
37	2.15987e+07
40	4.54801e+07
42	1.68619e+07
67	2.40752e+07
0	500345
16	4.9383e+06
21	7.63143e+06
22	7.66271e+06
24	4.24002e+06
25	9.22807e+06
26	5.47356e+06
28	8.93721e+06
30	1.99091e+07
31	7.93954e+06
33	9.5092e+06
35	2.45932e+07
36	2.31245e+07
37	1.48109e+07
40	4.38866e+07
42	1.26986e+07
67	2.21564e+07

## Sheet: c
Time (day)	DNA Yield (ng / ml culture)
0	11.85
1	0.9375
2	2.82
3	0.5625
4	15.225
5	4.875
6	1.5075
7	1.695
8	3.435
9	3.1575
10	5.925
11	5.55
12	10.8
13	9.4125
14	14.2875
15	25.6875
16	20.6625
17	33.45
18	17.9625
19	25.05
20	37.5
21	48.75
22	61.5
23	40.875
24	51.375
25	63.75
26	76.875
27	24.45
28	96.375
30	143.625
31	96
32	14.475
33	114
34	15.675
35	165
36	166.875
37	146.625
40	297.75
42	115.5
67	151.5

## Sheet: d
Mn(II) oxidised (µmol⋅ml-1)	DNA yield (ng / ml culture)
1.22221	11.85
1.76425	0.9375
0.957279	2.82
0.959598	0.5625
0.475758	15.225
2.27016	4.875
2.35484	1.5075
1.81053	1.695
2.41763	3.435
2.27061	3.1575
4.48156	5.925
4.36284	5.55
6.84118	10.8
6.89211	9.4125
6.8187	14.2875
10.5141	25.6875
9.21321	20.6625
11.0849	33.45
12.5703	17.9625
12.6626	25.05
17.4955	37.5
15.5331	48.75
18.1994	61.5
19.5204	40.875
22.3015	51.375
26.2266	63.75
26.6954	76.875
28.9198	24.45
31.1785	96.375
36.7651	143.625
34.0542	96
34.9259	14.475
39.3148	114
43.7604	15.675
49.5045	165
50.6335	166.875
55.1877	146.625
39.9973	297.75
72.3985	115.5
72.9875	151.5

## Sheet: e
Time (day)	Mn(II) oxidised (µmol⋅ml-1)
0	2.28014
5	1.03621
10	4.63682
15	10.328
20	17.4243
25	25.8621
30	35.0616
35	48.9553
40	67.9222
67	77.7155

## Sheet: f
Time (day)	Mn(II) oxidised (µmol⋅ml-1)
0	1.51944
5	1.49849
10	4.1041
15	4.93463
20	9.65513
25	14.7801
30	20.5347
35	26.9203
40	39.9973
67	72.9875

## Sheet: g
Time (day)	Mn(II) oxidised (µmol⋅ml-1)
0	1.36828
5	2.20732
10	4.38066
15	4.87977
20	10.4297
25	15.473
30	21.7532
35	29.6106
40	40.8796
67	71.5117

## Sheet: h
Time (day)	Mn(II) oxidised (µmol⋅ml-1)
0	1.15062
5	1.36028
10	3.29147
15	7.69042
20	14.126
25	25.0316
30	41.0439
35	50.6672
40	63.2766
67	83.7975

## Sheet: i
Time (day)	Mn(II) oxidised (µmol⋅ml-1)
0	3.47449
5	3.24451
10	4.63771
15	8.08462
20	13.7333
25	22.5967
30	34.3547
35	41.9305
40	47.833
67	78.3938

## Sheet: j
Time (day)	Mn(II) oxidised (µmol⋅ml-1)
0	0.941554
5	0.987192
10	5.7563
15	5.91728
20	13.3842
25	19.6961
30	31.025
35	41.2662
40	56.4116
67	79.9402

[truncated: 4 more sheets: k, l, m, n]
