# Supplementary material for: Bacterial chemolithoautotrophy via manganese oxidation
Source: Springer Nature journal article supplement (doi:10.1038/s41586-020-2468-5), 2020-07-15
Supplement: MOESM11 [file 41586_2020_2468_MOESM11_ESM.xlsx]

## Sheet: c
	Optical Dentisity (600 nm)
Time (Hour)	Tryptone Replicate 1	Tryptone Replicate 2	Tryptone Replicate 3
0	0.0134
0.75	0.0019	0.0004	0.0044
1.83333	0.0029	0.001	0.0028
4.83333	0.0033	0.0025	0.0018
8	0.0006	0.0004	0.0001
16.75	0.0174	0.0179	0.0141
18.8333	0.0305	0.0286	0.0226
20.9167	0.0498	0.0519	0.039
22.75	0.0721	0.073	0.0594
25.75	0.1035	0.1055	0.0923
28.75	0.1308	0.137	0.125
31	0.1481	0.1544	0.144
38.9167	0.1993	0.2069	0.2
40.75	0.2061	0.216	0.209
43.1667	0.2175	0.2262	0.2198
44.75	0.2209	0.2314	0.2274
48.0833	0.2349	0.2442	0.2396
51.5	0.2414	0.252	0.2509
69.8333	0.2746	0.2846	0.2845
93.5833	0.2941	0.3058	0.3081
116.667	0.3092	0.3239	0.3289
141	0.2894	0.2972	0.3285

## Sheet: d
	Optical Dentisity (600 nm)
Time (Hour)	Acetate Replicate 1	Acetate Replicate 2
0	0.0008
0.75	0.0004	0
1.83333	0.0021	0.0056
16.75	0.0026	0.0025
22.75	0.006	0.0057
28.75	0.0052	0.0054
40.75	0.0067	0.0058
51.5	0.0047	0.0045
69.8333	0.0095	0.0108
93.5833	0.0116	0.0137
116.667	0.0168	0.0161
141	0.0159	0.0174
