# Supplementary material for: Bacterial chemolithoautotrophy via manganese oxidation
Source: Springer Nature journal article supplement (doi:10.1038/s41586-020-2468-5), 2020-07-15
Supplement: MOESM12 [file 41586_2020_2468_MOESM12_ESM.xlsx]

## Sheet: a
Formamide (%)	Fluorescence for NLT499 probe and 16S rRNA gene clone of Species A (RU)	Formamide (%)	Fluorescence for BET359 probe and 16S rRNA gene clone of Species A (RU)
0.2	205	0.2	40
0.2	216	0.2	43
0.2	177	0.2	36
0.2	204	0.2	53
0.2	224	0.2	45
0.2	217	0.2	48
0.2	201	0.2	43
0.2	209	0.2	51
0.2	137	0.2	53
0.2	218	0.2	34
0.2	224	0.2	50
0.2	195	0.2	40
0.2	202	0.2	32
0.2	223	0.2	46
0.2	215	0.2	40
0.2	207	0.2	52
0.2	218	0.2	47
0.2	139	0.2	46
0.2	220	0.25	37
0.2	200	0.25	34
0.2	206	0.25	31
0.2	146	0.25	31
0.2	222	0.25	36
0.2	217	0.25	29
0.2	220	0.25	33
0.2	206	0.25	30
0.2	209	0.25	35
0.2	140	0.25	29
0.2	227	0.25	25
0.2	224	0.25	30
0.2	219	0.25	29
0.2	208	0.25	36
0.2	197	0.25	25
0.2	227	0.25	27
0.2	226	0.25	34
0.2	220	0.25	26
0.2	163	0.25	58
0.2	219	0.25	29
0.2	228	0.25	26
0.2	209	0.25	43
0.2	224	0.25	32
0.2	225	0.3	27
0.2	225	0.3	22
0.2	198	0.3	45
0.2	160	0.3	22
0.2	211	0.3	28
0.2	190	0.3	28
0.2	224	0.3	33
0.2	217	0.3	28
0.2	208	0.3	29
0.2	225	0.3	24
0.2	225	0.3	25
0.2	224	0.3	32
0.2	215	0.3	31
0.2	219	0.3	26
0.2	215	0.3	25
0.2	192	0.3	25
0.2	202	0.3	30
0.2	164	0.3	39
0.2	225	0.3	24
0.2	218	0.3	28
0.2	223	0.3	37
0.2	224	0.3	33
0.2	222	0.3	32
0.2	212	0.3	24
0.2	153	0.3	23
0.2	213	0.3	31
0.2	219	0.3	32
0.2	212	0.3	26
0.2	174	0.3	31
0.2	198	0.3	34
0.2	220	0.3	29
0.2	211	0.3	45
0.2	163	0.3	35
0.2	217	0.3	25
0.2	218	0.3	27
0.2	210	0.3	27
0.2	194	0.3	22
0.2	222	0.3	34
0.2	149	0.35	25
0.2	207	0.35	31
0.2	205	0.35	28
0.2	194	0.35	32
0.2	183	0.35	32
0.2	207	0.35	27
0.2	221	0.35	33
0.2	189	0.35	26
0.2	206	0.35	30
0.2	215	0.35	21
0.2	212	0.35	28
0.2	178	0.35	29
0.2	213	0.35	30
0.2	222	0.35	30
0.2	205	0.35	25
0.2	203	0.35	29
0.2	211	0.35	19
0.2	219	0.35	22
0.2	168	0.35	22
0.2	211	0.35	25
0.2	222	0.35	19
0.2	188	0.35	25
0.2	212	0.35	25
0.2	181	0.35	22
0.2	133	0.35	25
0.2	170	0.35	19
0.2	173	0.4	20
0.2	147	0.4	24
0.2	210	0.4	27
0.2	175	0.4	20
0.2	220	0.4	25
0.2	216	0.4	19
0.2	216	0.4	25
0.2	207	0.4	22
0.2	225	0.45	16
0.2	129	0.45	19
0.2	223	0.45	17
0.2	189	0.45	18
0.2	216	0.45	15
0.2	174	0.45	17
0.2	206	0.45	16
0.2	202	0.45	17
0.2	210	0.45	16
0.2	209	0.45	14
0.2	216	0.45	16
0.2	213	0.45	17
0.2	229	0.45	17
0.2	195	0.45	18
0.2	224	0.45	15
0.2	127	0.45	16
0.2	135	0.45	18
0.2	213	0.45	18
0.2	186	0.45	18
0.2	200	0.45	20
0.2	219	0.45	14
0.2	223	0.45	19
0.2	216	0.45	16
0.2	191	0.45	19
0.2	173	0.45	22
0.2	207	0.45	22
0.2	214	0.45	19
0.2	194	0.45	14
0.2	192	0.45	20
0.2	225	0.45	22
0.2	202	0.45	20
0.2	196	0.45	18
0.2	197	0.45	15
0.2	140	0.45	15
0.2	219	0.45	21
0.2	176	0.45	17
0.2	174	0.45	24
0.2	206	0.45	25
0.2	205	0.45	20
0.2	220	0.45	22
0.2	213	0.45	18
0.2	218	0.45	21
0.2	155	0.45	21
0.2	219	0.45	18
0.2	176	0.45	20
0.2	220	0.45	18
0.2	156	0.5	19
0.2	213	0.5	23
0.2	183	0.5	19
0.2	210	0.5	18
0.2	151	0.5	20
0.2	219	0.5	15
0.2	156	0.5	17
0.2	179	0.5	22
0.2	199	0.5	17
0.2	200	0.5	23
0.2	198	0.5	17
0.2	224	0.5	22
0.2	225	0.5	22
0.2	193	0.5	19
0.2	212	0.5	22
0.2	227	0.5	19
0.2	203	0.5	16
0.2	218	0.5	26
0.2	212	0.5	19
0.2	162	0.5	21
0.2	214	0.5	21
0.2	216	0.5	26
0.2	207	0.5	21
0.2	229	0.5	22
0.2	208	0.5	38
0.2	204	0.5	19
0.2	218	0.5	22
0.2	210	0.5	19
0.2	215	0.5	20
0.2	169	0.5	23
0.2	169	0.6	23
0.2	215	0.6	26
0.2	217	0.6	26
0.2	219	0.6	23
0.25	227	0.6	22
0.25	215	0.6	29
0.25	216	0.6	22
0.25	119	0.6	18
0.25	217	0.6	24
0.25	205	0.6	20
0.25	219	0.6	25
0.25	206	0.6	20
0.25	204	0.6	24
0.25	215	0.6	23
0.25	187	0.6	24
0.25	203	0.6	22
0.25	211	0.6	27
0.25	223	0.6	25
0.25	218	0.6	26
0.25	202	0.6	22
0.25	148	0.6	25
0.25	126	0.6	26
0.25	218	0.6	23
0.25	226	0.6	21
0.25	129	0.6	21
0.25	119
0.25	215
0.25	166
0.25	229
0.25	222
0.25	222
0.25	230
0.25	207
0.25	234
0.25	230
0.25	229
0.25	191
0.25	152
0.25	219
0.25	198
0.25	167
0.25	230
0.25	218
0.25	228
0.25	223
0.25	136
0.25	217
0.25	189
0.25	223
0.25	225
0.25	222
0.25	222
0.25	131
0.25	149
0.25	136
0.25	166
0.25	151
0.25	124
0.25	165
0.25	187
0.25	181
0.25	140
0.25	120
0.25	205
0.25	158
0.25	196
0.25	199
0.25	191
0.25	189
0.25	179
0.25	138
0.25	123
0.25	117
0.25	200
0.25	142
0.25	138
0.25	208
0.25	198
0.25	214
0.25	200
0.25	210
0.25	208
0.25	206
0.25	203
0.25	181
0.25	216
0.25	139
0.25	163
0.25	153
0.25	208
0.25	165
0.25	228
0.25	226
0.25	215
0.25	214
0.25	153
0.25	224
0.25	229
0.25	191
0.25	171
0.25	227
0.25	195
0.25	231
0.25	184
0.25	196
0.25	217
0.25	232
0.25	230
0.25	236
0.25	206
0.25	221
0.25	222
0.25	202
0.25	167
0.25	231
0.25	229
0.25	214
0.25	231
0.25	209
0.25	227
0.25	221
0.25	228
0.25	231
0.25	230
0.25	231
0.25	225
0.25	231
0.25	229
0.25	157
0.25	234
0.25	232
0.25	210
0.25	191
0.25	158
0.25	228
0.25	182
0.25	173
0.25	231
0.25	223
0.25	217
0.25	154
0.25	226
0.25	228
0.25	207
0.25	169
0.25	231
0.25	223
0.25	223
0.25	217
0.25	222
0.25	156
0.25	216
0.25	219
0.25	217
0.25	229
0.25	230
0.25	229
0.25	209
0.3	225
0.3	193
0.3	138
0.3	222
0.3	202
0.3	185
0.3	124
0.3	193
0.3	219
0.3	212
0.3	192
0.3	202
0.3	207
0.3	185
0.3	209
0.3	223
0.3	168
0.3	157
0.3	222
0.3	217
0.3	157
0.3	213
0.3	162
0.3	217
0.3	187
0.3	215
0.3	161
0.3	224
0.3	221
0.3	220
0.3	183
0.3	225
0.3	132
0.3	160
0.3	222
0.3	182
0.3	201
0.3	153
0.3	217
0.3	217
0.3	221
0.3	178
0.3	178
0.3	129
0.3	192
0.3	181
0.3	141
0.3	194
0.3	194
0.3	184
0.3	155
0.3	100
0.3	123
0.3	209
0.3	213
0.3	212
0.3	202
0.3	198
0.3	207
0.3	165
0.3	133
0.3	204
0.3	182
0.3	218
0.3	195
0.3	163
0.35	123
0.35	221
0.35	219
0.35	206
0.35	205
0.35	186
0.35	206
0.35	122
0.35	179
0.35	199
0.35	217
0.35	214
0.35	168
0.35	211
0.35	149
0.35	211
0.35	130
0.35	203
0.35	150
0.35	220
0.35	221
0.35	218
0.35	170
0.35	128
0.35	221
0.35	217
0.35	126
0.35	141
0.35	219
0.35	190
0.35	224
0.35	228
0.35	164
0.35	200
0.35	205
0.35	146
0.35	168
0.35	198
0.35	207
0.35	225
0.35	220
0.35	226
0.35	223
0.35	227
0.35	221
0.35	226
0.35	226
0.35	223
0.35	184
0.35	134
0.35	224
0.35	225
0.35	215
0.35	194
0.35	222
0.35	189
0.35	196
0.35	168
0.35	207
0.35	213
0.35	188
0.35	125
0.35	149
0.35	212
0.35	212
0.35	219
0.35	214
0.35	125
0.35	120
0.35	218
0.35	201
0.35	206
0.35	195
0.35	202
0.35	156
0.35	220
0.35	221
0.35	162
0.35	220
0.35	167
0.35	203
0.35	130
0.35	201
0.35	225
0.35	226
0.35	225
0.35	187
0.35	223
0.35	212
0.35	222
0.35	221
0.35	225
0.35	221
0.35	147
0.35	163
0.35	203
0.35	172
0.35	220
0.35	216
0.35	207
0.35	142
0.35	193
0.35	210
0.35	216
0.35	158
0.35	139
0.35	217
0.35	114
0.35	213
0.35	205
0.35	207
0.35	201
0.35	163
0.35	131
0.35	203
0.35	141
0.35	209
0.35	122
0.35	214
0.35	214
0.35	143
0.35	124
0.35	188
0.35	180
0.35	133
0.35	123
0.35	122
0.35	202
0.35	114
0.35	177
0.35	170
0.35	177
0.35	148
0.35	161
0.35	113
0.35	148
0.35	218
0.35	192
0.35	168
0.35	194
0.35	210
0.35	190
0.35	220
0.35	220
0.35	179
0.35	141
0.35	214
0.35	189
0.35	218
0.35	211
0.35	155
0.35	190
0.4	198
0.4	140
0.4	159
0.4	172
0.4	105
0.4	157
0.4	188
0.4	124
0.4	114
0.4	107
0.4	163
0.4	181
0.4	105
0.4	101
0.4	118
0.4	135
0.4	214
0.4	199
0.4	212
0.4	201
0.4	211
0.4	213
0.4	152
0.4	178
0.4	122
0.4	128
0.4	152
0.4	191
0.4	132
0.4	159
0.4	149
0.4	155
0.4	196
0.4	100
0.4	171
0.4	181
0.4	110
0.4	111
0.4	175
0.4	175
0.4	133
0.4	163
0.4	174
0.4	174
0.4	127
0.4	186
0.4	133
0.4	142
0.4	195
0.4	99
0.4	176
0.4	145
0.4	144
0.4	102
0.4	106
0.4	130
0.4	99
0.4	98
0.4	194
0.4	205
0.4	152
0.4	147
0.4	95
0.4	107
0.4	165
0.4	181
0.4	116
0.4	106
0.4	108
0.4	192
0.4	208
0.4	125
0.4	130
0.4	172
0.4	207
0.4	155
0.4	214
0.4	206
0.4	155
0.4	176
0.4	143
0.4	92
0.4	122
0.4	94
0.4	193
0.4	115
0.4	130
0.4	144
0.4	185
0.4	140
0.4	123
0.4	195
0.4	164
0.4	97
0.4	143
0.4	119
0.4	96
0.4	102
0.4	198
0.4	174
0.4	140
0.4	205
0.4	125
0.4	205
0.4	114
0.4	112
0.4	166
0.4	160
0.4	207
0.4	185
0.4	152
0.4	170
0.4	200
0.4	100
0.4	207
0.4	179
0.4	146
0.4	173
0.4	192
0.4	177
0.4	206
0.4	136
0.4	182
0.4	218
0.4	183
0.4	215
0.4	154
0.4	215
0.4	140
0.4	209
0.4	180
0.4	168
0.4	170
0.4	93
0.4	87
0.4	161
0.4	126
0.4	98
0.4	184
0.4	110
0.4	124
0.4	106
0.4	104
0.4	92
0.4	93
0.4	127
0.4	190
0.4	134
0.4	123
0.4	104
0.4	143
0.4	105
0.4	208
0.4	164
0.4	165
0.4	119
0.4	172
0.4	188
0.4	129
0.4	181
0.4	143
0.4	159
0.4	119
0.4	152
0.4	105
0.4	113
0.4	90
0.4	132
0.4	77
0.4	86
0.4	157
0.4	173
0.4	179
0.4	150
0.4	116
0.4	205
0.4	204
0.4	147
0.4	119
0.4	148
0.4	118
0.4	188
0.4	153
0.4	124
0.4	120
0.4	166
0.4	186
0.4	207
0.4	163
0.4	187
0.4	145
0.4	170
0.4	127
0.4	96
0.4	213
0.4	128
0.4	200
0.4	167
0.4	145
0.4	185
0.4	188
0.4	122
0.4	181
0.4	217
0.4	210
0.4	224
0.4	219
0.4	83
0.4	84
0.4	76
0.4	137
0.4	163
0.4	82
0.4	83
0.4	96
0.4	196
0.4	176
0.4	84
0.4	135
0.4	90
0.4	153
0.4	143
0.4	125
0.4	172
0.4	139
0.4	168
0.4	161
0.4	109
0.4	115
0.4	192
0.4	143
0.4	128
0.4	198
0.4	210
0.4	128
0.4	152
0.4	213
0.4	193
0.4	106
0.4	208
0.4	121
0.4	154
0.4	154
0.4	181
0.4	81
0.4	93
0.4	152
0.4	132
0.4	147
0.4	97
0.4	168
0.4	208
0.4	157
0.4	212
0.4	147
0.4	174
0.4	166
0.4	185
0.4	95
0.4	134
0.4	161
0.4	121
0.4	176
0.4	170
0.4	184
0.4	97
0.45	107
0.45	189
0.45	181
0.45	120
0.45	159
0.45	200
0.45	122
0.45	123
0.45	135
0.45	147
0.45	185
0.45	167
0.45	92
0.45	160
0.45	159
0.45	165
0.45	104
0.45	118
0.45	157
0.45	178
0.45	200
0.45	186
0.45	168
0.45	167
0.45	158
0.45	135
0.45	191
0.45	149
0.45	126
0.45	197
0.45	130
0.45	198
0.45	121
0.45	131
0.45	123
0.45	145
0.45	108
0.45	126
0.45	128
0.45	126
0.45	156
0.45	157
0.45	203
0.45	190
0.45	96
0.45	206
0.45	175
0.45	199
0.45	198
0.45	151
0.45	117
0.45	149
0.45	130
0.45	196
0.45	147
0.45	199
0.45	154
0.45	172
0.45	192
0.45	113
0.45	201
0.45	176
0.45	98
0.45	133
0.45	186
0.45	113
0.45	123
0.45	86
0.45	107
0.45	159
0.45	177
0.45	135
0.45	191
0.45	97
0.45	208
0.45	193
0.45	126
0.45	126
0.45	171
0.45	174
0.45	174
0.45	125
0.45	128
0.45	122
0.45	114
0.45	175
0.45	95
0.45	177
0.45	192
0.45	97
0.45	141
0.45	94
0.45	131
0.45	175
0.45	133
0.45	139
0.45	116
0.45	104
0.45	76
0.45	84
0.45	120
0.45	86
0.45	143
0.45	80
0.45	124
0.45	198
0.45	105
0.45	172
0.45	147
0.45	99
0.45	193
0.45	113
0.45	143
0.45	175
0.45	111
0.45	106
0.45	119
0.45	161
0.45	184
0.45	116
0.45	192
0.45	131
0.45	177
0.45	101
0.45	126
0.45	163
0.45	151
0.45	118
0.45	193
0.45	115
0.45	92
0.45	163
0.45	91
0.45	110
0.45	88
0.45	182
0.45	108
0.45	100
0.45	116
0.45	181
0.45	181
0.45	196
0.45	106
0.45	158
0.45	125
0.45	154
0.45	142
0.45	152
0.45	147
0.45	160
0.45	159
0.45	92
0.45	152
0.45	89
0.45	103
0.45	95
0.45	107
0.45	111
0.45	161
0.45	135
0.45	89
0.45	125
0.45	92
0.45	154
0.45	87
0.45	134
0.45	98
0.45	87
0.45	143
0.45	151
0.45	99
0.45	83
0.45	162
0.5	69
0.5	54
0.5	66
0.5	98
0.5	90
0.5	77
0.5	104
0.5	66
0.5	91
0.5	73
0.5	77
0.5	61
0.5	59
0.5	68
0.5	62
0.5	72
0.5	81
0.5	72
0.5	65
0.5	91
0.5	80
0.5	109
0.5	62
0.5	118
0.5	104
0.5	58
0.5	55
0.5	111
0.5	145
0.5	142
0.5	107
0.5	153
0.5	123
0.5	80
0.5	80
0.5	90
0.5	164
0.5	88
0.5	168
0.5	84
0.5	114
0.5	133
0.5	95
0.5	84
0.5	58
0.5	47
0.5	59
0.5	58
0.5	79
0.5	62
0.5	45
0.5	73
0.5	63
0.5	85
0.5	84
0.5	77
0.5	79
0.5	61
0.5	47
0.5	124
0.5	109
0.5	83
0.5	112
0.5	109
0.5	109
0.5	100
0.5	87
0.5	78
0.5	117
0.5	114
0.5	100
0.5	94
0.5	149
0.5	83
0.5	109
0.5	74
0.5	111
0.5	82
0.5	120
0.5	121
0.5	175
0.5	183
0.5	85
0.5	115
0.5	82
0.5	97
0.5	63
0.5	85
0.5	91
0.5	74
0.5	94
0.5	140
0.5	77
0.5	88
0.5	134
0.5	97
0.5	144
0.5	92
0.5	121
0.6	40
0.6	37
0.6	52
0.6	34
0.6	38
0.6	71
0.6	60
0.6	40
0.6	67
0.6	47
0.6	57
0.6	56
0.6	66
0.6	59
0.6	46
0.6	56
0.6	52
0.6	64
0.6	82
0.6	49
0.6	36
0.6	59
0.6	64
0.6	44
0.6	54
0.6	35
0.6	54
0.6	45
0.6	48
0.6	55
0.6	60
0.6	68
0.6	45
0.6	75
0.6	82
0.6	60
0.6	57
0.6	45
0.6	50
0.6	85
0.6	73
0.6	66
0.6	55
0.6	78
0.6	60
0.6	156
0.6	69
0.6	71
0.6	116
0.6	53
0.6	60
0.6	99
0.6	51
0.6	47
0.6	64
0.6	51
0.6	50
0.6	55
0.6	44
0.6	52
0.6	47
0.6	60
0.6	67
0.6	52
0.6	68
0.6	65
0.6	56
0.6	70
0.6	67
0.6	36
0.6	43
0.6	68
0.6	38
0.6	51
0.6	70
0.6	80
0.6	66
0.6	59
0.6	13
0.6	18
0.6	21
0.6	12
0.6	13
0.6	12
0.6	14
0.6	13
0.6	13
0.6	12
0.6	13
0.6	13
0.6	11
0.6	17
0.6	12
0.6	12
0.6	25
0.6	37
0.6	17
0.6	13
0.6	12
0.6	13
0.6	14
0.6	12
0.6	14
0.6	15
0.6	18
0.6	13
0.6	17
0.6	11
0.6	11
0.6	14
0.6	12
0.6	11
0.6	25
0.6	13
0.6	25
0.6	12
0.6	16
0.6	13
0.6	233
0.6	83
0.6	41
0.6	45
0.6	36
0.6	63
0.6	52
0.6	62
0.6	42
0.6	53
0.6	41
0.6	33
0.6	39
0.6	46
0.6	44
0.6	24
0.6	24
0.6	32
0.6	37
0.6	37
0.6	62
0.6	29
0.6	18
0.6	16
0.6	17
0.6	12
0.6	13
0.6	19
0.6	12
0.6	17
0.6	17
0.6	11
0.6	12
0.6	22
0.6	11
0.6	11
0.6	11
0.6	14
0.6	14
0.6	19
0.6	20
0.6	18
0.6	13
0.6	11
0.6	11
0.6	12
0.6	12
0.6	13
0.6	10
0.6	10
0.6	11
0.6	11
0.6	12
0.6	12
0.6	10
0.6	15
0.6	11
0.6	16

## Sheet: b
Formamide (%)	Fluorescence for NLT499 probe and 16S rRNA gene clone of Species A (RU)	Formamide (%)	Fluorescence for BET867 probe and 16S rRNA gene clone of Species A (RU)
0.2	217	0.2	36
0.2	218	0.2	34
0.2	143	0.2	42
0.2	218	0.2	34
0.2	219	0.2	37
0.2	221	0.2	71
0.2	220	0.2	36
0.2	174	0.2	40
0.2	222	0.2	32
0.2	227	0.2	26
0.2	189	0.2	33
0.2	206	0.2	36
0.2	218	0.2	54
0.2	204	0.2	55
0.2	206	0.2	57
0.2	179	0.2	52
0.2	155	0.2	55
0.2	210	0.2	51
0.2	175	0.2	46
0.2	209	0.2	43
0.2	219	0.2	65
0.2	170	0.2	37
0.2	149	0.2	54
0.2	222	0.2	43
0.2	207	0.2	48
0.2	213	0.2	61
0.2	219	0.2	59
0.2	170	0.2	49
0.2	202	0.2	34
0.2	210	0.2	47
0.2	204	0.2	52
0.2	220	0.2	46
0.2	183	0.2	71
0.2	227	0.2	52
0.2	216	0.2	157
0.2	192	0.2	32
0.2	216	0.2	29
0.2	188	0.2	40
0.2	146	0.2	32
0.2	219	0.2	30
0.2	164	0.2	34
0.2	199	0.2	39
0.2	161	0.2	37
0.2	158	0.2	43
0.2	188	0.2	32
0.2	197	0.2	39
0.2	203	0.2	33
0.2	189	0.2	26
0.2	210	0.2	41
0.2	159	0.2	35
0.2	132	0.2	28
0.2	190	0.2	32
0.2	206	0.2	27
0.2	227	0.2	31
0.2	193	0.2	44
0.2	217	0.2	41
0.2	217	0.2	37
0.2	218	0.2	42
0.2	221	0.2	44
0.2	216	0.2	62
0.2	224	0.2	52
0.2	229	0.2	58
0.2	224	0.2	63
0.2	223	0.2	43
0.2	223	0.2	65
0.2	227	0.2	56
0.2	224	0.2	91
0.2	209	0.2	57
0.2	219	0.2	44
0.2	225	0.2	52
0.2	227	0.2	69
0.2	152	0.2	51
0.2	211	0.2	64
0.2	208	0.2	56
0.2	205	0.2	51
0.2	220	0.2	66
0.2	217	0.2	68
0.2	211	0.2	59
0.2	197	0.2	57
0.2	223	0.2	57
0.2	222	0.2	64
0.2	140	0.2	48
0.2	220	0.2	87
0.2	142	0.2	49
0.2	172	0.2	49
0.2	223	0.2	61
0.2	211	0.2	58
0.2	218	0.2	74
0.2	201	0.2	70
0.2	214	0.2	62
0.2	143	0.2	71
0.2	142	0.2	45
0.2	197	0.2	52
0.2	189	0.2	52
0.2	197	0.2	63
0.2	171	0.2	35
0.2	202	0.2	45
0.2	215	0.2	67
0.2	151	0.2	58
0.2	158	0.2	45
0.2	205	0.2	56
0.2	154	0.2	50
0.2	207	0.2	49
0.2	209	0.2	47
0.2	216	0.2	46
0.2	198	0.2	45
0.2	196	0.2	58
0.2	142	0.2	39
0.2	205	0.2	47
0.2	123	0.2	57
0.2	194	0.2	40
0.2	208	0.2	50
0.2	198	0.2	44
0.2	139	0.2	39
0.2	125	0.2	56
0.2	212	0.2	43
0.2	207	0.2	56
0.2	170	0.2	39
0.2	190	0.2	45
0.2	171	0.2	45
0.25	163	0.2	58
0.25	212	0.2	54
0.25	178	0.2	57
0.25	229	0.2	121
0.25	182	0.3	34
0.25	205	0.3	29
0.25	213	0.3	33
0.25	211	0.3	28
0.25	140	0.3	34
0.25	205	0.3	31
0.25	220	0.3	38
0.25	213	0.3	27
0.25	228	0.3	29
0.25	177	0.3	23
0.25	176	0.3	34
0.25	169	0.3	32
0.25	201	0.3	28
0.25	224	0.3	25
0.25	202	0.3	28
0.25	159	0.3	25
0.25	217	0.3	27
0.25	213	0.3	39
0.25	205	0.3	56
0.25	217	0.3	30
0.25	215	0.3	68
0.25	204	0.3	28
0.25	217	0.3	29
0.25	218	0.3	28
0.25	215	0.3	26
0.25	219	0.3	57
0.25	132	0.3	32
0.25	225	0.3	30
0.25	192	0.3	27
0.25	214	0.3	27
0.25	187	0.3	22
0.25	158	0.3	32
0.25	149	0.3	30
0.25	221	0.3	21
0.25	227	0.3	28
0.25	214	0.3	20
0.25	222	0.3	34
0.25	198	0.3	25
0.25	201	0.3	25
0.25	198	0.3	34
0.25	129	0.3	29
0.25	224	0.3	27
0.25	187	0.3	22
0.25	196	0.3	20
0.25	233	0.3	20
0.25	230	0.3	27
0.25	136	0.3	26
0.25	190	0.3	156
0.25	130	0.3	115
0.25	132	0.3	56
0.25	229	0.3	30
0.25	226	0.3	24
0.25	214	0.3	31
0.25	230	0.3	27
0.25	155	0.35	193
0.25	224	0.35	31
0.25	218	0.35	28
0.25	225	0.35	33
0.25	229	0.35	25
0.25	212	0.35	31
0.25	159	0.35	25
0.25	224	0.35	35
0.25	182	0.35	22
0.25	204	0.35	23
0.25	136	0.35	40
0.25	213	0.35	35
0.25	207	0.35	31
0.25	222	0.35	28
0.25	225	0.35	34
0.25	221	0.35	30
0.25	189	0.35	31
0.25	221	0.35	37
0.25	213	0.35	22
0.25	184	0.35	30
0.25	178	0.35	30
0.25	216	0.35	36
0.25	136	0.35	28
0.25	206	0.35	18
0.25	223	0.35	15
0.25	207	0.35	30
0.25	212	0.35	20
0.25	126	0.35	23
0.25	214	0.35	21
0.25	165	0.35	37
0.25	209	0.35	27
0.25	212	0.35	26
0.25	218	0.35	24
0.25	209	0.35	29
0.25	176	0.35	26
0.25	210	0.35	28
0.25	207	0.35	29
0.25	216	0.35	28
0.25	212	0.35	29
0.25	168	0.35	30
0.25	170	0.35	28
0.25	184	0.35	20
0.25	186	0.35	23
0.25	210	0.35	22
0.25	211	0.35	21
0.25	187	0.35	29
0.25	223	0.35	24
0.25	220	0.35	27
0.25	229	0.35	24
0.25	200	0.35	33
0.25	220	0.35	23
0.3	228	0.35	24
0.3	222	0.35	23
0.3	198	0.35	24
0.3	213	0.35	31
0.3	221	0.35	24
0.3	204	0.35	60
0.3	224	0.35	27
0.3	218	0.35	27
0.3	211	0.35	33
0.3	146	0.35	25
0.3	209	0.35	28
0.3	117	0.35	32
0.3	179	0.35	22
0.3	207	0.35	32
0.3	224	0.35	27
0.3	224	0.35	25
0.3	198	0.35	26
0.3	148	0.35	31
0.3	178	0.35	32
0.3	170	0.45	21
0.3	204	0.45	17
0.3	220	0.45	25
0.3	128	0.45	23
0.3	224	0.45	26
0.3	141	0.45	21
0.3	175	0.45	25
0.3	224	0.45	19
0.3	214	0.45	19
0.3	223	0.45	26
0.3	223	0.45	17
0.3	164	0.45	25
0.3	179	0.45	18
0.3	147	0.45	22
0.3	194	0.45	20
0.3	217	0.45	23
0.3	182	0.45	27
0.3	164	0.45	21
0.3	222	0.45	21
0.3	190	0.45	21
0.3	178	0.45	29
0.3	222	0.45	23
0.3	218	0.45	25
0.3	211	0.45	21
0.3	219	0.45	23
0.3	148	0.45	21
0.3	139	0.45	23
0.3	199	0.5	20
0.3	211	0.5	21
0.3	127	0.5	20
0.3	183	0.5	19
0.3	215	0.5	23
0.3	155	0.5	22
0.3	213	0.5	17
0.3	190	0.5	18
0.3	194	0.5	21
0.3	146	0.5	23
0.3	204	0.5	15
0.3	107	0.5	21
0.3	193	0.5	18
0.3	128	0.5	20
0.3	131	0.5	20
0.3	173	0.5	25
0.3	203	0.5	20
0.3	113	0.5	15
0.35	195	0.5	16
0.35	181	0.5	24
0.35	217	0.5	22
0.35	202	0.5	19
0.35	214	0.5	24
0.35	212	0.5	23
0.35	207	0.5	17
0.35	130	0.5	17
0.35	132	0.5	20
0.35	143	0.5	22
0.35	140	0.5	39
0.35	218	0.5	19
0.35	195	0.6	21
0.35	120	0.6	22
0.35	199	0.6	19
0.35	119	0.6	21
0.35	201	0.6	22
0.35	118	0.6	22
0.35	113	0.6	31
0.35	189	0.6	27
0.35	216	0.6	30
0.35	202	0.6	24
0.35	82	0.6	20
0.35	59	0.6	25
0.35	70	0.6	24
0.35	75	0.6	22
0.35	121	0.6	18
0.35	57	0.6	19
0.35	128	0.6	21
0.35	201	0.6	24
0.35	135	0.6	21
0.35	148	0.6	21
0.35	192	0.6	23
0.35	149	0.6	25
0.35	196	0.6	26
0.35	149	0.6	27
0.35	186	0.6	20
0.35	202	0.6	21
0.35	146	0.6	26
0.35	183	0.6	24
0.35	193	0.6	21
0.35	202	0.6	23
0.35	203	0.6	24
0.35	221	0.6	18
0.35	204	0.6	21
0.35	222	0.6	17
0.35	215	0.6	21
0.35	214	0.6	25
0.35	200	0.6	23
0.35	199	0.6	20
0.35	207	0.6	25
0.35	223	0.6	27
0.35	209	0.6	24
0.35	196	0.6	21
0.35	116	0.6	22
0.35	180	0.6	19
0.35	224	0.6	22
0.35	214	0.6	21
0.35	127	0.6	23
0.35	221	0.6	22
0.35	185	0.6	25
0.35	216	0.6	34
0.35	206	0.6	25
0.35	192	0.6	24
0.35	143	0.6	23
0.35	223	0.6	28
0.35	185	0.6	19
0.35	223	0.6	24
0.35	225	0.6	22
0.35	184	0.6	30
0.35	194
0.35	208
0.35	140
0.35	210
0.35	214
0.35	222
0.35	192
0.35	192
0.35	217
0.35	151
0.35	218
0.35	223
0.35	221
0.35	202
0.35	191
0.35	211
0.35	207
0.35	216
0.35	217
0.35	208
0.35	168
0.35	210
0.35	195
0.35	192
0.35	139
0.35	144
0.35	156
0.35	219
0.35	199
0.35	209
0.35	180
0.35	210
0.35	204
0.35	217
0.35	159
0.35	133
0.35	210
0.35	222
0.35	215
0.35	214
0.35	192
0.35	211
0.35	221
0.35	196
0.35	139
0.35	214
0.35	165
0.35	224
0.35	229
0.4	160
0.4	161
0.4	94
0.4	160
0.4	149
0.4	144
0.4	160
0.4	98
0.4	187
0.4	173
0.4	194
0.4	151
0.4	131
0.4	206
0.4	166
0.4	140
0.4	207
0.4	167
0.4	118
0.4	120
0.4	203
0.4	193
0.4	169
0.4	167
0.4	141
0.4	113
0.4	151
0.4	170
0.4	193
0.4	198
0.4	189
0.4	183
0.4	210
0.4	123
0.4	154
0.4	149
0.4	179
0.4	103
0.4	117
0.4	204
0.4	206
0.4	173
0.4	207
0.4	127
0.4	148
0.4	192
0.4	200
0.4	129
0.4	170
0.4	174
0.4	132
0.4	201
0.4	195
0.4	211
0.4	146
0.4	119
0.4	169
0.4	140
0.4	186
0.4	201
0.4	95
0.4	203
0.4	204
0.4	190
0.4	162
0.4	120
0.4	97
0.4	104
0.4	92
0.4	107
0.4	125
0.4	189
0.4	166
0.4	150
0.4	137
0.4	169
0.4	189
0.4	120
0.4	104
0.4	137
0.4	122
0.4	125
0.4	197
0.4	193
0.4	145
0.4	203
0.4	151
0.4	194
0.4	148
0.4	111
0.4	121
0.4	177
0.4	153
0.4	101
0.4	188
0.4	106
0.4	179
0.4	199
0.4	145
0.4	183
0.4	176
0.4	119
0.4	208
0.4	190
0.4	122
0.4	179
0.4	131
0.4	191
0.4	176
0.4	116
0.4	150
0.4	129
0.4	157
0.4	134
0.4	104
0.4	114
0.4	124
0.4	147
0.4	73
0.4	119
0.4	176
0.4	75
0.4	79
0.4	123
0.4	128
0.4	86
0.4	97
0.4	168
0.4	79
0.4	88
0.4	97
0.4	89
0.4	208
0.4	220
0.4	201
0.4	161
0.4	109
0.4	140
0.4	95
0.4	86
0.4	95
0.4	147
0.4	84
0.4	90
0.4	137
0.4	130
0.4	173
0.4	84
0.4	92
0.4	129
0.4	84
0.4	142
0.4	170
0.4	105
0.4	125
0.4	122
0.4	151
0.4	131
0.4	141
0.4	90
0.4	154
0.4	120
0.4	87
0.4	162
0.4	118
0.4	183
0.4	93
0.4	136
0.4	89
0.4	124
0.4	162
0.4	111
0.4	92
0.4	178
0.4	152
0.4	199
0.4	113
0.4	148
0.4	134
0.4	143
0.4	176
0.4	170
0.4	172
0.4	207
0.4	149
0.4	173
0.4	108
0.4	108
0.4	126
0.4	203
0.4	154
0.4	123
0.4	194
0.4	120
0.4	115
0.4	153
0.4	110
0.4	195
0.4	208
0.4	136
0.4	198
0.4	186
0.4	145
0.4	130
0.4	208
0.4	176
0.4	117
0.4	108
0.4	125
0.4	115
0.4	134
0.4	104
0.4	103
0.4	113
0.4	177
0.4	165
0.4	145
0.4	200
0.4	198
0.4	140
0.4	160
0.4	99
0.4	115
0.4	118
0.4	95
0.4	120
0.4	164
0.4	161
0.4	177
0.45	121
0.45	92
0.45	95
0.45	81
0.45	79
0.45	140
0.45	68
0.45	89
0.45	88
0.45	63
0.45	73
0.45	87
0.45	123
0.45	116
0.45	78
0.45	73
0.45	95
0.45	64
0.45	93
0.45	116
0.45	135
0.45	67
0.45	121
0.45	94
0.45	75
0.45	66
0.45	158
0.45	138
0.45	67
0.45	74
0.45	111
0.45	78
0.45	104
0.45	100
0.45	89
0.45	61
0.45	149
0.45	136
0.45	79
0.45	108
0.45	80
0.45	98
0.45	86
0.45	105
0.45	114
0.45	94
0.45	131
0.45	129
0.45	87
0.45	188
0.45	138
0.45	86
0.45	92
0.45	172
0.45	148
0.45	179
0.45	175
0.45	92
0.45	86
0.45	119
0.45	96
0.45	114
0.45	145
0.45	156
0.45	188
0.45	84
0.45	139
0.45	97
0.45	110
0.45	128
0.45	144
0.45	90
0.45	119
0.45	143
0.45	135
0.45	83
0.45	137
0.45	92
0.45	147
0.45	114
0.45	85
0.45	77
0.45	85
0.45	116
0.45	105
0.45	178
0.45	130
0.45	188
0.45	187
0.45	118
0.45	111
0.45	147
0.45	111
0.45	148
0.45	99
0.45	133
0.45	121
0.45	120
0.45	85
0.45	156
0.45	87
0.45	135
0.45	81
0.45	63
0.45	82
0.45	92
0.45	60
0.45	63
0.45	69
0.45	54
0.45	71
0.45	52
0.45	51
0.45	55
0.45	75
0.45	70
0.45	59
0.45	72
0.45	75
0.45	101
0.45	68
0.45	82
0.45	73
0.45	87
0.45	84
0.45	161
0.45	75
0.45	104
0.45	97
0.45	185
0.45	136
0.45	127
0.45	139
0.45	131
0.45	198
0.45	106
0.45	127
0.45	194
0.45	182
0.45	121
0.45	118
0.45	140
0.45	154
0.45	100
0.5	76
0.5	79
0.5	103
0.5	93
0.5	159
0.5	86
0.5	97
0.5	83
0.5	121
0.5	104
0.5	92
0.5	108
0.5	151
0.5	61
0.5	96
0.5	118
0.5	69
0.5	52
0.5	116
0.5	62
0.5	82
0.5	107
0.5	80
0.5	83
0.5	97
0.5	77
0.5	60
0.5	77
0.5	78
0.5	97
0.5	116
0.5	68
0.5	106
0.5	97
0.5	111
0.5	70
0.5	73
0.5	99
0.5	78
0.5	76
0.5	174
0.5	92
0.5	161
0.5	112
0.5	136
0.5	89
0.5	168
0.5	119
0.5	108
0.5	74
0.5	114
0.5	83
0.5	139
0.5	91
0.5	131
0.5	112
0.5	90
0.5	98
0.5	101
0.5	115
0.5	126
0.5	91
0.5	75
0.5	85
0.5	56
0.5	37
0.5	63
0.5	74
0.5	88
0.5	37
0.5	45
0.5	59
0.5	84
0.5	53
0.5	38
0.5	40
0.5	39
0.5	63
0.5	72
0.5	53
0.5	40
0.5	36
0.5	42
0.5	63
0.5	72
0.5	63
0.5	59
0.5	50
0.5	75
0.5	73
0.5	49
0.5	43
0.5	49
0.5	48
0.5	44
0.5	65
0.5	42
0.5	43
0.5	38
0.5	44
0.5	40
0.5	68
0.5	53
0.5	37
0.5	41
0.5	43
0.5	82
0.5	101
0.5	53
0.5	85
0.5	87
0.5	119
0.5	162
0.5	72
0.5	134
0.5	78
0.5	79
0.5	114
0.5	87
0.5	102
0.5	129
0.5	90
0.5	117
0.5	80
0.5	98
0.5	108
0.5	157
0.5	104
0.5	103
0.6	146
0.6	28
0.6	21
0.6	29
0.6	38
0.6	24
0.6	27
0.6	27
0.6	38
0.6	35
0.6	26
0.6	34
0.6	28
0.6	34
0.6	22
0.6	55
0.6	28
0.6	57
0.6	32
0.6	43
0.6	36
0.6	44
0.6	28
0.6	49
0.6	75
0.6	30
0.6	48
0.6	58
0.6	30
0.6	51
0.6	55
0.6	40
0.6	50
0.6	45
0.6	35
0.6	46
0.6	64
0.6	65
0.6	31
0.6	30
0.6	32
0.6	39

## Sheet: c
Formamide (%)	Fluorescence for BET359 probe and 16S rRNA gene clone of Species B (RU)	Formamide (%)	Fluorescence for NLT499 probe and 16S rRNA gene clone of Species B (RU)
0.2	205	0.2	35
0.2	215	0.2	50
0.2	208	0.2	65
0.2	210	0.2	37
0.2	199	0.2	33
0.2	203	0.2	48
0.2	205	0.2	35
0.2	214	0.2	34
0.2	168	0.2	95
0.2	221	0.2	34
0.2	209	0.2	82
0.2	217	0.2	36
0.2	150	0.2	39
0.2	205	0.2	49
0.2	185	0.2	39
0.2	160	0.2	35
0.2	212	0.2	39
0.2	206	0.2	38
0.2	217	0.2	49
0.2	226	0.2	46
0.2	214	0.2	38
0.2	213	0.2	33
0.2	214	0.2	38
0.2	220	0.2	44
0.2	217	0.2	41
0.2	209	0.2	40
0.2	221	0.2	41
0.2	215	0.2	36
0.2	208	0.2	48
0.2	207	0.2	62
0.2	214	0.2	37
0.2	216	0.2	41
0.2	200	0.2	39
0.2	204	0.2	38
0.2	200	0.2	40
0.2	215	0.2	37
0.2	208	0.2	39
0.2	195	0.2	33
0.2	200	0.2	47
0.2	205	0.2	34
0.2	198	0.2	39
0.2	193	0.2	39
0.2	197	0.2	41
0.2	198	0.2	39
0.2	198	0.2	84
0.2	199	0.2	37
0.2	212	0.2	35
0.2	135	0.2	36
0.2	137	0.2	39
0.2	202	0.2	36
0.2	208	0.2	45
0.2	219	0.2	41
0.2	210	0.2	42
0.2	212	0.2	99
0.2	206	0.2	35
0.2	212	0.2	41
0.2	214	0.2	38
0.2	204	0.2	39
0.2	212	0.2	55
0.2	216	0.2	38
0.2	217	0.2	64
0.2	213	0.2	40
0.2	216	0.2	32
0.2	214	0.2	40
0.2	189	0.2	53
0.2	205	0.2	35
0.2	205	0.2	57
0.2	143	0.2	35
0.2	150	0.2	35
0.2	155	0.2	41
0.2	217	0.2	35
0.2	213	0.2	41
0.2	217	0.2	39
0.2	213	0.2	41
0.2	226	0.2	30
0.2	233	0.2	35
0.2	227	0.2	37
0.2	228	0.2	30
0.2	216	0.2	40
0.2	224	0.2	37
0.2	211	0.2	31
0.2	222	0.2	39
0.2	216	0.2	39
0.2	126	0.2	45
0.2	227	0.2	32
0.2	217	0.2	29
0.2	210	0.2	69
0.2	211	0.2	33
0.2	221	0.2	33
0.2	226	0.2	34
0.2	204	0.2	40
0.2	221	0.2	46
0.2	162	0.2	56
0.2	228	0.2	37
0.2	215	0.2	43
0.2	229	0.2	42
0.2	216	0.2	34
0.2	223	0.2	29
0.2	222	0.2	44
0.2	218	0.2	32
0.2	218	0.2	35
0.2	218	0.2	37
0.2	220	0.2	35
0.2	220	0.2	39
0.2	195	0.2	39
0.2	230	0.2	31
0.2	228	0.2	33
0.2	216	0.2	32
0.2	220	0.2	37
0.2	148	0.2	40
0.2	144	0.2	34
0.25	217	0.2	33
0.25	214	0.2	39
0.25	194	0.2	35
0.25	219	0.2	30
0.25	184	0.2	44
0.25	188	0.2	37
0.25	203	0.2	34
0.25	201	0.2	32
0.25	207	0.2	44
0.25	212	0.2	39
0.25	218	0.2	32
0.25	210	0.2	41
0.25	201	0.2	46
0.25	207	0.2	33
0.25	134	0.2	55
0.25	126	0.2	45
0.25	136	0.2	31
0.25	173	0.2	28
0.25	213	0.2	34
0.25	205	0.2	34
0.25	196	0.2	47
0.25	194	0.2	29
0.25	145	0.2	32
0.25	214	0.2	31
0.25	212	0.2	37
0.25	217	0.2	30
0.25	208	0.2	31
0.25	214	0.2	27
0.25	205	0.2	52
0.25	199	0.2	50
0.25	200	0.2	33
0.25	202	0.2	32
0.25	208	0.2	35
0.25	204	0.2	33
0.25	215	0.2	44
0.25	207	0.2	48
0.25	164	0.2	35
0.25	216	0.2	34
0.25	215	0.2	35
0.25	147	0.2	31
0.25	208	0.2	48
0.25	212	0.2	47
0.25	219	0.2	30
0.25	212	0.2	53
0.25	214	0.2	35
0.25	213	0.2	39
0.25	217	0.2	39
0.25	213	0.2	54
0.25	221	0.2	64
0.25	207	0.2	33
0.25	226	0.2	37
0.25	211	0.2	61
0.25	214	0.2	41
0.25	214	0.2	36
0.25	208	0.2	53
0.25	215	0.2	38
0.25	217	0.2	56
0.25	218	0.2	42
0.25	182	0.2	42
0.25	218	0.2	38
0.25	224	0.2	40
0.25	220	0.2	41
0.25	162	0.2	40
0.25	224	0.2	38
0.25	216	0.2	36
0.25	214	0.2	36
0.25	205	0.2	33
0.25	167	0.2	32
0.25	219	0.2	34
0.25	230	0.2	39
0.25	146	0.2	32
0.25	150	0.2	43
0.25	139	0.2	40
0.25	225	0.2	45
0.25	220	0.2	34
0.25	209	0.2	37
0.25	229	0.2	33
0.25	222	0.2	50
0.25	227	0.2	39
0.25	220	0.2	56
0.25	230	0.2	66
0.25	222	0.2	37
0.25	232	0.2	34
0.25	217	0.2	47
0.25	227	0.2	51
0.25	230	0.2	51
0.25	197	0.2	49
0.25	226	0.2	45
0.25	217	0.2	52
0.25	221	0.2	54
0.25	229	0.2	40
0.25	219	0.2	36
0.25	130	0.2	44
0.25	218	0.2	55
0.25	231	0.2	39
0.25	224	0.2	71
0.25	230	0.2	40
0.25	218	0.2	45
0.25	205	0.2	40
0.25	210	0.2	41
0.25	226	0.2	33
0.25	204	0.2	33
0.25	202	0.2	38
0.25	173	0.2	34
0.25	206	0.2	56
0.25	200	0.2	60
0.25	157	0.2	44
0.25	132	0.2	39
0.25	200	0.2	42
0.25	136	0.2	45
0.25	220	0.2	43
0.25	228	0.2	33
0.25	130	0.2	39
0.25	200	0.2	34
0.25	216	0.2	43
0.25	216	0.2	48
0.25	218	0.2	37
0.25	216	0.2	39
0.25	227	0.2	39
0.25	151	0.2	48
0.25	226	0.2	41
0.25	221	0.2	44
0.25	219	0.2	41
0.25	228	0.2	42
0.25	212	0.2	37
0.25	145	0.2	44
0.25	218	0.2	47
0.25	220	0.2	47
0.25	215	0.2	43
0.25	228	0.2	53
0.25	227	0.2	44
0.25	149	0.2	41
0.25	152	0.2	59
0.25	218	0.2	51
0.25	145	0.2	46
0.25	213	0.2	40
0.25	214	0.2	50
0.25	216	0.2	46
0.25	202	0.2	38
0.25	187	0.2	35
0.25	212	0.2	46
0.25	215	0.2	37
0.25	219	0.2	44
0.25	217	0.2	48
0.25	174	0.2	40
0.25	219	0.2	39
0.25	227	0.2	41
0.25	207	0.2	38
0.25	221	0.2	40
0.25	219	0.2	39
0.25	226	0.2	33
0.25	219	0.2	38
0.25	229	0.2	43
0.25	223	0.2	121
0.25	210	0.2	39
0.25	161	0.2	42
0.25	152	0.2	42
0.25	216	0.2	42
0.25	210	0.2	40
0.25	226	0.2	52
0.25	215	0.2	41
0.25	217	0.2	46
0.25	219	0.2	46
0.25	226	0.2	41
0.25	217	0.2	63
0.25	215	0.2	41
0.25	221	0.2	50
0.25	219	0.2	70
0.25	229	0.2	49
0.25	226	0.2	49
0.25	230	0.2	40
0.25	211	0.2	44
0.25	209	0.2	56
0.25	199	0.2	37
0.25	226	0.2	64
0.25	139	0.2	45
0.25	150	0.2	37
0.25	170	0.2	106
0.25	186	0.2	43
0.25	147	0.2	58
0.25	226	0.2	65
0.25	214	0.2	41
0.25	228	0.25	44
0.25	219	0.25	56
0.25	221	0.25	59
0.25	213	0.25	42
0.25	221	0.25	51
0.25	200	0.25	55
0.25	219	0.25	42
0.25	205	0.25	53
0.25	207	0.25	42
0.25	151	0.25	65
0.25	210	0.25	50
0.25	231	0.25	43
0.25	203	0.25	45
0.25	220	0.25	54
0.25	175	0.25	48
0.25	139	0.25	47
0.25	204	0.25	41
0.25	211	0.25	50
0.25	212	0.25	51
0.25	221	0.25	49
0.25	127	0.25	41
0.25	172	0.25	49
0.25	226	0.25	42
0.25	231	0.25	43
0.25	228	0.25	64
0.25	215	0.25	45
0.25	221	0.25	52
0.25	213	0.25	40
0.25	216	0.25	48
0.25	209	0.25	53
0.25	214	0.25	53
0.25	229	0.25	44
0.25	222	0.25	48
0.25	230	0.25	45
0.25	190	0.25	46
0.25	206	0.25	36
0.25	212	0.25	49
0.25	210	0.25	46
0.25	207	0.25	41
0.25	207	0.25	51
0.25	228	0.25	38
0.3	198	0.25	34
0.3	224	0.25	32
0.3	211	0.25	34
0.3	216	0.25	44
0.3	227	0.25	66
0.3	127	0.25	47
0.3	228	0.25	49
0.3	155	0.25	48
0.3	231	0.25	43
0.3	157	0.25	74
0.3	213	0.25	52
0.3	171	0.25	33
0.3	198	0.25	31
0.3	229	0.25	43
0.3	198	0.25	47
0.3	156	0.25	39
0.3	160	0.25	41
0.3	198	0.25	49
0.3	203	0.25	36
0.3	112	0.25	32
0.3	192	0.25	57
0.3	130	0.25	52
0.3	209	0.25	38
0.3	203	0.25	74
0.3	139	0.25	61
0.3	146	0.25	34
0.3	207	0.25	45
0.3	213	0.25	40
0.3	208	0.25	41
0.3	215	0.25	33
0.3	217	0.25	36
0.3	227	0.25	40
0.3	222	0.25	34
0.3	219	0.25	38
0.3	176	0.25	43
0.3	218	0.25	28
0.3	217	0.25	35
0.3	222	0.25	30
0.3	216	0.25	27
0.3	148	0.25	36
0.3	215	0.25	29
0.3	216	0.25	31
0.3	214	0.25	32
0.3	199	0.25	29
0.3	216	0.25	42
0.3	209	0.25	33
0.3	217	0.25	48
0.3	214	0.25	45
0.3	221	0.25	45
0.3	208	0.25	50
0.3	140	0.25	51
0.3	225	0.25	48
0.3	218	0.25	58
0.3	177	0.25	56
0.3	210	0.25	107
0.3	213	0.25	44
0.3	150	0.25	44
0.3	147	0.25	46
0.3	167	0.25	54
0.3	211	0.25	54
0.3	214	0.25	49
0.3	208	0.25	43
0.3	163	0.25	48
0.3	149	0.25	38
0.3	172	0.25	35
0.3	207	0.25	68
0.3	220	0.25	41
0.3	193	0.25	40
0.3	207	0.25	56
0.3	211	0.25	52
0.3	216	0.25	51
0.3	198	0.25	44
0.3	209	0.25	37
0.3	216	0.25	39
0.3	212	0.25	46
0.3	200	0.25	87
0.3	218	0.25	61
0.3	130	0.25	42
0.3	194	0.25	42
0.3	153	0.25	62
0.3	207	0.25	52
0.3	166	0.25	45
0.3	193	0.25	51
0.3	206	0.25	82
0.3	203	0.25	40
0.3	202	0.25	39
0.3	205	0.25	47
0.3	180	0.25	45
0.3	151	0.25	44
0.3	211	0.25	50
0.3	207	0.25	55
0.3	180	0.25	44
0.3	175	0.25	58
0.3	194	0.25	51
0.3	111	0.25	54
0.3	198	0.25	41
0.3	193	0.25	42
0.3	126	0.25	48
0.3	181	0.25	44
0.3	118	0.25	36
0.3	157	0.25	48
0.3	224	0.25	43
0.3	222	0.25	38
0.3	208	0.25	32
0.3	223	0.25	33
0.3	222	0.25	69
0.3	225	0.25	48
0.3	200	0.25	40
0.3	203	0.25	38
0.3	219	0.25	50
0.3	222	0.25	37
0.3	209	0.25	43
0.3	228	0.25	45
0.3	224	0.25	46
0.3	219	0.25	46
0.3	144	0.25	55
0.3	228	0.25	62
0.3	206	0.25	42
0.3	216	0.25	42
0.3	218	0.25	43
0.3	224	0.25	44
0.3	213	0.25	48
0.3	145	0.25	38
0.3	222	0.25	35
0.3	209	0.25	41
0.3	223	0.25	56
0.3	206	0.25	34
0.3	213	0.25	38
0.3	218	0.25	50
0.3	220	0.25	44
0.3	172	0.25	33
0.3	212	0.25	32
0.3	218	0.25	40
0.3	217	0.25	45
0.3	208	0.25	35
0.3	141	0.25	41
0.3	213	0.25	34
0.3	141	0.25	32
0.3	142	0.25	36
0.3	222	0.25	42
0.3	209	0.25	48
0.3	218	0.25	73
0.3	216	0.25	53
0.3	214	0.25	55
0.3	219	0.25	73
0.3	219	0.25	67
0.3	212	0.25	57
0.3	212	0.25	62
0.3	212	0.25	67
0.3	216	0.25	55
0.3	216	0.25	55
0.3	215	0.25	60
0.3	192	0.25	67
0.3	211	0.25	71
0.3	229	0.25	63
0.3	210	0.25	60
0.3	191	0.25	69
0.3	206	0.25	51
0.3	191	0.25	59
0.3	193	0.25	50
0.3	217	0.25	66
0.3	200	0.25	72
0.3	230	0.25	79
0.3	158	0.25	58
0.3	221	0.25	58
0.3	215	0.25	52
0.3	217	0.25	58
0.3	220	0.25	75
0.3	226	0.25	58
0.3	173	0.25	57
0.3	229	0.25	76
0.3	227	0.25	56
0.3	210	0.25	65
0.3	210	0.25	63
0.3	158	0.25	55
0.3	225	0.25	51
0.3	222	0.25	58
0.3	208	0.25	86
0.3	219	0.25	50
0.3	174	0.25	62
0.3	229	0.25	56
0.3	231	0.25	59
0.3	207	0.25	68
0.3	225	0.25	50
0.3	220	0.25	51
0.3	229	0.25	56
0.3	224	0.25	67
0.3	227	0.25	55
0.3	226	0.25	45
0.3	224	0.25	67
0.3	221	0.25	57
0.3	216	0.25	42
0.3	224	0.25	50
0.3	223	0.25	58
0.3	216	0.25	60
0.3	207	0.25	51
0.3	221	0.25	41
0.3	225	0.25	44
0.3	224	0.25	52
0.3	198	0.25	44
0.3	187	0.25	43
0.3	236	0.25	48
0.3	233	0.25	59
0.3	166	0.25	81
0.3	226	0.25	54
0.3	233	0.25	49
0.3	227	0.25	57
0.3	225	0.25	69
0.3	219	0.25	47
0.3	224	0.25	60
0.3	218	0.25	69
0.3	230	0.25	49
0.3	177	0.25	66
0.3	220	0.25	64
0.3	230	0.25	56
0.3	216	0.25	76
0.3	224	0.25	61
0.3	230	0.25	65
0.3	222	0.25	52
0.3	218	0.25	50
0.3	229	0.25	48
0.3	154	0.25	47
0.3	229	0.25	58
0.3	228	0.25	75
0.3	226	0.25	72
0.3	125	0.25	53
0.3	224	0.25	86
0.3	165	0.25	39
0.3	215	0.25	73
0.3	207	0.25	48
0.3	223	0.25	63
0.3	217	0.25	46
0.3	157	0.25	42
0.3	222	0.25	64
0.3	204	0.25	47
0.3	204	0.25	48
0.35	216	0.25	59
0.35	229	0.25	56
0.35	222	0.25	54
0.35	232	0.25	46
0.35	217	0.25	44
0.35	178	0.25	44
0.35	198	0.25	46
0.35	216	0.3	27
0.35	173	0.3	26
0.35	203	0.3	28
0.35	220	0.3	35
0.35	225	0.3	25
0.35	223	0.3	32
0.35	210	0.3	21
0.35	222	0.3	27
0.35	193	0.3	35
0.35	231	0.3	29
0.35	213	0.3	25
0.35	230	0.3	27
0.35	234	0.3	26
0.35	235	0.3	24
0.35	196	0.3	23
0.35	227	0.3	36
0.35	224	0.3	43
0.35	228	0.3	23
0.35	232	0.3	29
0.35	231	0.3	31
0.35	230	0.3	24
0.35	230	0.3	24
0.35	221	0.3	30
0.35	226	0.3	27
0.35	229	0.3	25
0.35	229	0.3	36
0.35	142	0.3	24
0.35	234	0.3	27
0.35	227	0.3	30
0.35	132	0.3	26
0.35	204	0.3	31
0.35	229	0.3	26
0.35	215	0.3	25
0.35	224	0.3	28
0.35	212	0.3	26
0.35	206	0.3	30
0.35	210	0.3	28
0.35	198	0.3	25
0.35	216	0.3	36
0.35	220	0.3	31
0.35	207	0.3	24
0.35	212	0.3	32
0.35	227	0.3	28
0.35	217	0.3	41
0.35	148	0.3	25
0.35	215	0.3	30
0.35	213	0.3	37
0.35	221	0.3	26
0.35	217	0.3	28
0.35	201	0.3	28
0.35	156	0.3	37
0.35	138	0.3	32
0.35	228	0.3	32
0.35	222	0.3	27
0.35	218	0.3	25
0.35	214	0.3	26
0.35	226	0.3	26
0.35	229	0.3	23
0.35	228	0.3	26
0.35	226	0.3	31
0.35	208	0.3	27
0.35	230	0.3	27
0.35	213	0.3	24
0.35	233	0.3	27
0.35	222	0.3	30
0.35	218	0.3	27
0.35	227	0.3	31
0.35	215	0.3	37
0.35	225	0.3	38
0.35	175	0.3	41
0.35	217	0.3	48
0.35	232	0.3	36
0.35	219	0.3	36
0.35	233	0.3	52
0.35	223	0.3	46
0.35	166	0.3	37
0.35	230	0.3	47
0.35	216	0.3	37
0.35	226	0.3	39
0.35	227	0.3	34
0.35	229	0.3	46
0.35	232	0.3	38
0.35	232	0.3	40
0.35	224	0.3	41
0.35	229	0.3	38
0.35	230	0.3	46
0.35	198	0.3	37
0.35	231	0.3	37
0.35	210	0.3	36
0.35	217	0.3	47
0.35	225	0.3	44
0.35	225	0.3	38
0.35	226	0.3	41
0.35	221	0.3	40
0.35	192	0.3	34
0.35	229	0.3	38
0.35	205	0.3	35
0.35	129	0.3	40
0.35	212	0.3	45
0.35	228	0.3	36
0.35	203	0.3	36
0.35	156	0.3	61
0.35	219	0.3	34
0.35	222	0.3	35
0.35	223	0.3	37
0.35	196	0.3	40
0.35	222	0.3	28
0.35	185	0.3	52
0.35	164	0.3	33
0.35	157	0.3	39
0.35	185	0.3	39
0.35	166	0.3	37
0.35	149	0.3	48
0.35	206	0.3	33
0.35	229	0.3	35
0.35	200	0.3	35
0.35	226	0.3	35
0.35	130	0.3	32
0.35	124	0.3	33
0.35	209	0.3	39
0.35	206	0.3	43
0.35	187	0.3	48
0.35	110	0.3	35
0.4	229	0.3	65
0.4	227	0.3	31
0.4	220	0.3	33
0.4	151	0.3	37
0.4	155	0.3	56
0.4	227	0.3	43
0.4	215	0.3	31
0.4	173	0.3	31
0.4	193	0.3	37
0.4	203	0.3	30
0.4	168	0.3	43
0.4	224	0.3	51
0.4	125	0.3	37
0.4	212	0.3	50
0.4	221	0.3	33
0.4	220	0.3	29
0.4	134	0.3	38
0.4	229	0.3	33
0.4	223	0.3	34
0.4	226	0.3	32
0.4	199	0.3	31
0.4	221	0.3	34
0.4	207	0.3	34
0.4	212	0.3	32
0.4	223	0.3	29
0.4	204	0.3	27
0.4	134	0.3	39
0.4	189	0.3	30
0.4	219	0.3	29
0.4	226	0.3	31
0.4	214	0.3	34
0.4	223	0.3	37
0.4	218	0.3	29
0.4	232	0.3	27
0.4	230	0.3	30
0.4	214	0.3	33
0.4	152	0.3	36
0.4	225	0.3	51
0.4	217	0.3	26
0.4	127	0.3	31
0.4	186	0.3	25
0.4	208	0.3	31
0.4	170	0.3	29
0.4	177	0.3	31
0.4	201	0.3	36
0.4	210	0.3	29
0.4	230	0.3	46
0.4	144	0.3	33
0.4	227	0.3	26
0.4	227	0.3	32
0.4	232	0.3	25
0.4	205	0.3	31
0.4	228	0.3	36
0.4	231	0.3	41
0.4	214	0.3	38
0.4	213	0.3	31
0.4	230	0.3	34
0.4	228	0.3	29
0.4	196	0.3	29
0.4	181	0.3	47
0.4	214	0.3	25
0.4	223	0.3	28
0.4	179	0.3	25
0.4	201	0.3	29
0.4	223	0.3	28
0.4	140	0.3	27
0.4	192	0.3	31
0.4	218	0.3	29
0.4	224	0.3	28
0.4	224	0.3	24
0.4	196	0.3	27
0.4	225	0.3	27
0.4	221	0.3	31
0.4	212	0.3	27
0.4	213	0.3	38
0.4	197	0.3	34
0.4	230	0.3	33
0.4	127	0.3	31
0.4	207	0.3	35
0.4	230	0.3	30
0.4	230	0.3	31
0.4	160	0.3	31
0.4	228	0.3	28
0.4	207	0.3	35
0.4	202	0.3	50
0.4	232	0.3	28
0.4	221	0.3	30
0.4	220	0.3	37
0.4	219	0.3	43
0.4	230	0.3	24
0.4	216	0.3	31
0.4	201	0.3	26
0.4	135	0.3	31
0.4	227	0.3	26
0.4	226	0.3	25
0.4	126	0.3	30
0.4	204	0.3	30
0.4	144	0.3	24
0.4	178	0.3	27
0.4	215	0.3	33
0.4	229	0.3	28
0.4	222	0.3	26
0.4	229	0.3	28
0.4	222	0.3	27
0.4	231	0.35	24
0.4	161	0.35	27
0.4	193	0.35	30
0.4	219	0.35	26
0.4	227	0.35	29
0.4	227	0.35	34
0.4	153	0.35	28
0.4	147	0.35	39
0.4	135	0.35	32
0.4	173	0.35	30
0.4	202	0.35	29
0.4	234	0.35	27
0.4	227	0.35	27
0.4	225	0.35	25
0.4	165	0.35	29
0.4	208	0.35	33
0.4	186	0.35	28
0.4	226	0.35	31
0.4	226	0.35	28
0.4	204	0.35	27
0.4	224	0.35	33
0.4	146	0.35	27
0.4	175	0.35	24
0.4	229	0.35	32
0.4	202	0.35	31
0.4	228	0.35	29
0.4	219	0.35	31
0.4	232	0.35	25
0.4	224	0.35	30
0.4	228	0.35	29
0.4	236	0.35	46
0.4	225	0.35	26
0.4	218	0.35	27
0.4	134	0.35	26
0.4	225	0.35	32
0.4	156	0.35	24
0.4	231	0.35	28
0.4	226	0.35	43
0.4	230	0.35	25
0.4	191	0.35	27
0.4	134	0.35	31
0.4	222	0.35	30
0.4	220	0.35	23
0.4	132	0.35	30
0.4	216	0.35	29
0.4	210	0.35	23
0.4	205	0.35	26
0.4	219	0.35	28
0.4	209	0.35	27
0.4	214	0.35	34
0.4	140	0.35	34
0.4	125	0.35	31
0.4	133	0.35	57
0.4	230	0.35	31
0.4	142	0.35	43
0.4	145	0.35	28
0.4	224	0.35	26
0.4	230	0.35	38
0.4	189	0.35	34
0.4	231	0.35	24
0.4	230	0.35	30
0.4	231	0.35	24
0.4	222	0.35	63
0.4	215	0.35	29
0.45	188	0.35	28
0.45	189	0.35	26
0.45	194	0.35	37
0.45	149	0.35	31
0.45	199	0.35	28
0.45	177	0.35	38
0.45	181	0.35	28
0.45	190	0.35	31
0.45	160	0.35	23
0.45	114	0.35	40
0.45	131	0.35	29
0.45	167	0.35	26
0.45	116	0.35	28
0.45	109	0.35	24
0.45	213	0.35	24
0.45	139	0.35	28
0.45	147	0.35	35
0.45	198	0.35	28
0.45	123	0.35	31
0.45	204	0.35	25
0.45	152	0.35	24
0.45	152	0.35	21
0.45	170	0.35	22
0.45	195	0.35	29
0.45	106	0.35	25
0.45	192	0.35	23
0.45	184	0.35	29
0.45	181	0.35	22
0.45	181	0.35	25
0.45	193	0.35	27
0.45	198	0.35	30
0.45	149	0.35	25
0.45	189	0.35	30
0.45	181	0.35	23
0.45	207	0.35	21
0.45	205	0.35	27
0.45	194	0.35	25
0.45	204	0.35	21
0.45	193	0.35	25
0.45	130	0.35	21
0.45	207	0.35	22
0.45	206	0.35	25
0.45	170	0.35	24
0.45	192	0.35	25
0.45	222	0.35	19
0.45	203	0.35	23
0.45	191	0.35	24
0.45	196	0.35	29
0.45	163	0.35	26
0.45	211	0.35	20
0.45	206	0.35	30
0.45	143	0.35	29
0.45	217	0.35	28
0.45	211	0.35	22
0.45	222	0.35	20
0.45	150	0.35	24
0.45	211	0.35	24
0.45	202	0.35	22
0.45	185	0.35	25
0.45	218	0.35	23
0.45	201	0.35	23
0.45	214	0.35	27
0.45	210	0.35	24
0.45	139	0.35	27
0.45	127	0.35	21
0.45	197	0.35	21
0.45	220	0.35	30
0.45	184	0.35	24
0.45	166	0.35	31
0.45	225	0.35	24
0.45	228	0.35	28
0.45	129	0.35	27
0.45	132	0.35	25
0.45	217	0.35	27
0.45	228	0.35	35
0.45	197	0.35	34
0.45	139	0.35	28
0.45	222	0.35	26
0.45	224	0.35	26
0.45	217	0.35	22
0.45	226	0.35	45
0.45	227	0.35	26
0.45	169	0.35	26
0.45	153	0.35	27
0.45	179	0.35	26
0.45	218	0.35	25
0.45	222	0.35	29
0.45	225	0.35	34
0.45	221	0.35	27
0.45	228	0.35	28
0.45	223	0.35	27
0.45	171	0.35	25
0.45	203	0.35	27
0.45	196	0.35	25
0.45	218	0.35	25
0.45	173	0.35	25
0.45	224	0.35	22
0.45	226	0.35	30
0.45	219	0.35	24
0.45	205	0.35	27
0.45	201	0.35	48
0.45	131	0.35	23
0.45	217	0.35	25
0.45	230	0.35	31
0.45	161	0.35	29
0.45	212	0.35	29
0.45	153	0.35	32
0.45	227	0.35	27
0.45	226	0.35	30
0.45	232	0.35	43
0.45	231	0.35	33
0.45	223	0.35	48
0.45	219	0.35	24
0.45	205	0.35	31
0.45	224	0.35	30
0.45	215	0.35	34
0.45	215	0.35	30
0.45	221	0.35	33
0.45	212	0.35	25
0.45	225	0.35	28
0.45	205	0.35	35
0.45	225	0.35	34
0.45	158	0.35	38
0.45	227	0.35	48
0.45	174	0.35	32
0.45	222	0.35	33
0.45	183	0.35	24
0.45	224	0.35	28
0.45	226	0.35	25
0.45	215	0.35	34
0.45	126	0.35	31
0.45	187	0.35	26
0.45	222	0.35	38
0.45	180	0.35	31
0.45	199	0.35	26
0.45	120	0.35	30
0.45	179	0.35	34
0.45	173	0.35	46
0.45	181	0.35	46
0.45	217	0.35	30
0.45	220	0.35	30
0.45	107	0.35	37
0.45	213	0.35	34
0.45	187	0.35	31
0.45	200	0.35	24
0.45	192	0.35	25
0.45	184	0.35	25
0.45	207	0.35	26
0.45	159	0.35	31
0.45	174	0.35	34
0.45	215	0.35	26
0.45	127	0.35	22
0.45	112	0.35	27
0.45	162	0.35	24
0.45	216	0.35	28
0.45	165	0.35	28
0.45	128	0.35	28
0.45	117	0.35	27
0.45	217	0.35	22
0.45	231	0.35	27
0.45	214	0.35	24
0.45	213	0.35	29
0.45	171	0.35	28
0.45	215	0.35	27
0.45	166	0.35	24
0.45	223	0.35	31
0.45	198	0.35	36
0.45	131	0.35	34
0.45	189	0.35	26
0.45	150	0.35	25
0.45	207	0.35	25
0.45	228	0.35	32
0.45	224	0.35	28
0.45	205	0.35	29
0.45	141	0.35	26
0.45	218	0.35	29
0.45	208	0.35	23
0.45	229	0.35	33
0.45	154	0.35	27
0.45	190	0.35	28
0.45	220	0.35	24
0.45	223	0.35	24
0.45	126	0.35	26
0.45	226	0.35	35
0.45	193	0.35	24
0.45	220	0.35	25
0.45	125	0.35	24
0.45	184	0.35	32
0.45	193	0.35	29
0.45	230	0.35	25
0.5	89	0.35	53
0.5	71	0.35	23
0.5	50	0.35	28
0.5	67	0.35	34
0.5	80	0.35	24
0.5	63	0.35	22
0.5	73	0.35	29
0.5	50	0.35	30
0.5	99	0.35	22
0.5	68	0.35	23
0.5	50	0.35	24
0.5	74	0.35	25
0.5	100	0.35	21
0.5	76	0.35	23
0.5	86	0.35	26
0.5	101	0.35	27
0.5	103	0.35	26
0.5	92	0.35	47
0.5	93	0.35	38
0.5	90	0.35	46
0.5	86	0.35	32
0.5	61	0.35	48
0.5	80	0.35	47
0.5	101	0.35	48
0.5	72	0.35	33
0.5	94	0.35	45
0.5	72	0.35	33
0.5	67	0.35	43
0.5	82	0.35	42
0.5	60	0.35	32
0.5	86	0.35	45
0.5	88	0.35	31
0.5	79	0.35	35
0.5	87	0.35	35
0.5	83	0.35	44
0.5	52	0.35	39
0.5	90	0.35	39
0.5	53	0.35	37
0.5	76	0.35	43
0.5	83	0.35	58
0.5	84	0.35	39
0.5	67	0.35	42
0.5	85	0.35	28
0.5	88	0.35	43
0.5	97	0.35	32
0.5	81	0.35	43
0.5	62	0.35	37
0.5	86	0.35	44
0.5	82	0.35	39
0.5	88	0.35	45
0.5	79	0.35	35
0.5	83	0.35	53
0.5	90	0.35	43
0.5	56	0.35	43
0.5	81	0.35	46
0.5	83	0.35	44
0.5	59	0.35	41
0.5	85	0.35	72
0.5	77	0.35	41
0.5	53	0.35	33
0.5	91	0.35	45
0.5	57	0.35	36
0.5	82	0.35	28
0.5	90	0.35	36
0.5	84	0.35	33
0.5	78	0.35	29
0.5	72	0.35	30
0.5	81	0.35	31
0.5	92	0.35	41
0.5	63	0.35	37
0.5	55	0.35	33
0.5	85	0.35	34
0.5	74	0.35	31
0.5	55	0.35	34
0.5	54	0.35	30
0.5	90	0.35	33
0.5	86	0.35	40
0.5	95	0.35	28
0.5	78	0.35	32
0.5	71	0.35	32
0.5	58	0.35	30
0.5	142	0.35	35
0.5	81	0.35	31
0.5	75	0.35	37
0.5	84	0.35	30
0.5	64	0.35	30
0.5	81	0.35	44
0.5	67	0.35	30
0.5	84	0.35	35
0.5	82	0.35	31
0.5	87	0.35	29
0.5	57	0.4	25
0.5	69	0.4	22
0.5	72	0.4	22
0.5	91	0.4	26
0.5	88	0.4	24
0.5	106	0.4	25
0.5	73	0.4	25
0.5	96	0.4	26
0.5	54	0.4	24
0.5	102	0.4	34
0.5	89	0.4	28
0.5	84	0.4	33
0.5	85	0.4	26
0.5	82	0.4	23
0.5	60	0.4	30
0.5	66	0.4	23
0.5	90	0.4	21
0.5	97	0.4	21
0.5	80	0.4	31
0.5	59	0.4	25
0.5	59	0.4	32
0.5	61	0.4	25
0.5	102	0.4	20
0.5	103	0.4	24
0.5	86	0.4	26
0.5	127	0.4	24
0.5	128	0.4	24
0.5	93	0.4	25
0.5	91	0.4	23
0.5	101	0.4	27
0.5	124	0.4	23
0.5	83	0.4	23
0.5	70	0.4	21
0.5	60	0.4	24
0.5	62	0.4	25
0.5	90	0.4	23
0.5	88	0.4	31
0.5	80	0.4	24
0.5	83	0.4	27
0.5	89	0.4	34
0.5	104	0.4	22
0.5	105	0.4	22
0.5	69	0.4	23
0.5	100	0.4	20
0.5	119	0.4	23
0.5	91	0.4	26
0.5	98	0.4	22
0.5	65	0.4	27
0.5	110	0.4	22
0.5	98	0.4	25
0.5	94	0.4	31
0.5	87	0.4	32
0.5	85	0.4	28
0.5	102	0.4	29
0.5	97	0.4	31
0.5	107	0.4	32
0.5	81	0.4	23
0.5	77	0.4	26
0.5	104	0.4	32
0.5	68	0.4	27
0.5	90	0.4	34
0.5	82	0.4	39
0.5	54	0.4	31
0.5	82	0.4	29
0.5	105	0.4	33
0.5	94	0.4	28
0.5	109	0.4	24
0.5	88	0.4	26
0.5	61	0.4	25
0.5	108	0.4	29
0.5	74	0.4	34
0.5	56	0.4	34
0.5	97	0.4	27
0.5	73	0.4	42
0.5	77	0.4	28
0.5	97	0.4	25
0.5	79	0.4	33
0.5	93	0.4	30
0.5	84	0.4	31
0.5	90	0.4	28
0.5	95	0.4	26
0.5	102	0.4	32
0.5	93	0.4	26
0.5	100	0.4	29
0.5	66	0.4	32
0.5	93	0.4	26
0.5	72	0.4	33
0.5	79	0.4	28
0.5	64	0.4	27
0.5	105	0.4	30
0.5	81	0.4	26
0.5	93	0.4	23
0.5	105	0.4	27
0.5	67	0.4	25
0.5	84	0.4	33
0.5	63	0.4	27
0.5	114	0.4	25
0.5	68	0.4	25
0.5	81	0.4	26
0.5	99	0.4	27
0.5	108	0.4	29
0.5	104	0.4	33
0.5	97	0.4	30
0.5	114	0.4	31
0.5	94	0.4	51
0.5	126	0.4	28
0.5	111	0.4	25
0.5	121	0.4	34
0.5	116	0.4	27
0.5	64	0.4	34
0.5	81	0.4	26
0.5	83	0.4	26
0.5	93	0.4	32
0.5	115	0.4	29
0.5	67	0.4	24
0.5	108	0.4	28
0.5	108	0.4	26
0.5	76	0.4	26
0.5	101	0.4	29
0.5	72	0.4	22
0.5	65	0.4	26
0.5	65	0.4	26
0.5	80	0.4	25
0.5	75	0.4	31
0.5	98	0.4	26
0.5	98	0.4	27
0.5	92	0.4	23
0.5	67	0.4	23
0.5	107	0.4	28
0.5	74	0.4	38
0.5	88	0.4	39
0.5	74	0.4	31
0.5	83	0.4	35
0.5	109	0.4	33
0.5	108	0.4	31
0.5	85	0.4	34
0.5	71	0.4	56
0.5	85	0.4	31
0.5	124	0.4	36
0.5	110	0.4	32
0.5	105	0.4	26
0.5	83	0.4	28
0.5	86	0.4	33
0.5	79	0.4	29
0.5	58	0.4	31
0.5	118	0.4	29
0.5	104	0.4	29
0.5	89	0.4	31
0.5	89	0.4	29
0.5	92	0.4	29
0.5	62	0.4	27
0.5	103	0.4	28
0.5	63	0.4	29
0.5	90	0.4	30
0.5	58	0.4	36
0.5	60	0.4	35
0.5	88	0.4	30
0.5	104	0.4	30
0.5	101	0.4	30
0.5	82	0.4	28
0.5	62	0.4	34
0.6	58	0.4	36
0.6	46	0.4	26
0.6	48	0.4	30
0.6	59	0.4	31
0.6	43	0.4	29
0.6	73	0.4	39
0.6	63	0.4	33
0.6	45	0.4	37
0.6	57	0.4	32
0.6	49	0.4	33
0.6	94	0.4	32
0.6	65	0.4	31
0.6	61	0.4	41
0.6	56	0.4	35
0.6	57	0.4	40
0.6	51	0.4	35
0.6	49	0.4	47
0.6	71	0.4	47
0.6	65	0.4	28
0.6	74	0.4	34
0.6	93	0.4	34
0.6	100	0.4	35
0.6	54	0.4	34
0.6	43	0.4	30
0.6	68	0.4	35
0.6	78	0.4	39
0.6	68	0.4	36
0.6	78	0.4	33
0.6	42	0.4	29
0.6	45	0.4	35
0.6	44	0.4	30
0.6	41	0.4	32
0.6	43	0.4	30
0.6	58	0.4	24
0.6	52	0.4	32
0.6	64	0.4	27
0.6	46	0.4	26
0.6	77	0.4	32
0.6	58	0.4	33
0.6	50	0.4	36
0.6	62	0.4	32
0.6	50	0.4	26
0.6	36	0.4	31
0.6	40	0.4	29
0.6	47	0.4	28
0.6	75	0.4	54
0.6	62	0.4	35
0.6	47	0.4	30
0.6	34	0.4	26
0.6	65	0.4	28
0.6	55	0.4	28
0.6	59	0.4	31
0.6	44	0.4	34
0.6	39	0.4	35
0.6	54	0.4	33
0.6	33	0.4	34
0.6	37	0.4	35
0.6	47	0.4	29
0.6	57	0.4	28
0.6	45	0.4	32
0.6	56	0.4	34
0.6	61	0.4	36
0.6	34	0.4	39
0.6	49	0.4	28
0.6	55	0.4	69
0.6	60	0.4	33
0.6	36	0.4	30
0.6	53	0.4	48
0.6	38	0.4	42
0.6	47	0.4	43
0.6	36	0.4	37
0.6	47	0.4	33
0.6	53	0.4	27
0.6	49	0.4	29
0.6	42	0.4	41
0.6	42	0.4	32
0.6	52	0.4	31
0.6	34	0.4	31
0.6	57	0.4	31
0.6	36	0.4	34
0.6	57	0.4	52
0.6	56	0.4	33
0.6	35	0.4	33
0.6	52	0.4	49
0.6	74	0.4	33
0.6	41	0.4	31
0.6	49	0.4	38
0.6	44	0.4	32
0.6	49	0.4	33
0.6	57	0.4	33
0.6	39	0.4	29
0.6	49	0.4	42
0.6	49	0.4	37
0.6	48	0.4	26
0.6	42	0.4	34
0.6	84	0.4	45
0.6	41	0.4	29
0.6	44	0.4	31
0.6	55	0.4	30
0.6	34	0.4	31
0.6	58	0.4	28
0.6	55	0.4	31
0.6	57	0.4	37
0.6	33	0.4	30
0.6	47	0.4	26
0.6	53	0.4	24
0.6	65	0.4	24
0.6	56	0.4	25
0.6	34	0.4	27
0.6	57	0.4	34
0.6	68	0.4	33
0.6	47	0.4	38
0.6	34	0.4	23
0.6	52	0.4	39
0.6	58	0.4	38
0.6	50	0.4	26
0.6	61	0.4	30
0.6	46	0.4	24
0.6	57	0.4	32
0.6	38	0.4	27
0.6	55	0.4	32
0.6	56	0.4	29
0.6	33	0.4	34
0.6	40	0.4	25
0.6	45	0.4	35
0.6	47	0.4	29
0.6	50	0.4	25
0.6	59	0.4	28
0.6	62	0.4	30
0.6	64	0.4	39
0.6	39	0.4	33
0.6	48	0.4	38
0.6	36	0.4	34
0.6	49	0.4	36
0.6	55	0.4	43
0.6	68	0.4	35
0.6	72	0.4	31
0.6	64	0.4	35
0.6	47	0.4	32
0.6	65	0.4	42
0.6	76	0.4	34
0.6	61	0.4	60
0.6	64	0.4	42
0.6	68	0.4	44
0.6	75	0.4	38
0.6	69	0.4	45
0.6	46	0.4	40
0.6	74	0.4	34
0.6	70	0.4	57
0.6	74	0.4	36
0.6	65	0.4	37
0.6	81	0.4	47
0.6	140	0.4	54
0.6	94	0.4	41
0.6	50	0.4	38
0.6	67	0.4	43
0.6	59	0.4	33
0.6	47	0.4	37
0.6	64	0.4	34
0.6	36	0.4	36
0.6	31	0.4	33
0.6	50	0.4	48
0.6	32	0.4	37
0.6	36	0.4	44
0.6	53	0.4	34
0.6	56	0.4	37
0.6	32	0.4	35
0.6	46	0.4	34
0.6	43	0.4	30
0.6	53	0.4	34
0.6	53	0.4	38
0.6	49	0.4	40
0.6	55	0.4	33
0.6	52	0.4	29
0.6	31	0.4	30
0.6	28	0.4	28
0.6	31	0.4	34
0.6	44	0.4	49
0.6	37	0.4	42
0.6	38	0.4	35
0.6	35	0.4	43
0.6	49	0.4	43
0.6	50	0.4	38
0.6	30	0.4	37
0.6	48	0.4	33
0.6	52	0.4	41
0.6	33	0.4	41
0.6	62	0.4	43
0.6	63	0.4	41
0.6	62	0.4	39
0.6	69	0.4	42
0.6	40	0.4	48
0.6	81	0.4	44
0.6	57	0.4	39
0.6	43	0.4	41
0.6	70	0.4	41
0.6	60	0.4	45
0.6	41	0.4	42
0.6	73	0.4	43
0.6	41	0.4	52
0.6	62	0.4	39
0.6	46	0.4	47
0.6	72	0.4	37
0.6	64	0.4	42
0.6	76	0.4	50
0.6	70	0.4	35
0.6	40	0.4	38
0.6	59	0.4	35
0.6	71	0.4	37
0.6	55	0.4	43
0.6	71	0.4	35
0.6	69	0.4	38
0.6	50	0.4	41
0.6	55	0.4	29
0.6	62	0.4	32
0.7	69	0.4	31
0.7	45	0.4	26
0.7	67	0.4	43
0.7	55	0.4	35
0.7	67	0.4	29
0.7	43	0.4	27
0.7	47	0.4	47
0.7	46	0.4	41
0.7	70	0.4	53
0.7	89	0.4	35
0.7	52	0.4	31
0.7	48	0.4	35
0.7	74	0.4	32
0.7	50	0.4	30
0.7	57	0.4	29
0.7	62	0.4	31
0.7	73	0.4	29
0.7	53	0.4	29
0.7	62	0.4	26
0.7	42	0.4	34
0.7	56	0.4	31
0.7	72	0.4	32
0.7	62	0.4	38
0.7	58	0.4	35
0.7	59	0.4	31
0.7	68	0.4	28
0.7	57	0.4	36
0.7	66	0.4	34
0.7	110	0.4	38
0.7	52	0.4	30
0.7	41	0.4	31
0.7	44	0.4	28
0.7	54	0.4	32
0.7	70	0.4	37
0.7	48	0.4	38
0.7	57	0.4	30
0.7	58	0.4	35
0.7	54	0.4	40
0.7	67	0.4	39
0.7	58	0.4	37
0.7	51	0.4	37
0.7	80	0.4	31
0.7	71	0.4	30
0.7	51	0.4	30
0.7	54	0.4	37
0.7	62	0.4	34
0.7	62	0.4	30
0.7	62	0.4	31
0.7	67	0.4	39
0.7	76	0.4	34
0.7	71	0.4	33
0.7	69	0.4	39
0.7	78	0.4	39
0.7	75	0.4	34
0.7	53	0.4	66
0.7	43	0.4	52
0.7	46	0.4	38
0.7	47	0.4	46
0.7	77	0.4	40
0.7	62	0.4	43
0.7	46	0.4	47
0.7	71	0.4	39
0.7	42	0.4	44
0.7	40	0.4	61
0.7	44	0.4	34
0.7	72	0.4	40
0.7	61	0.4	36
0.7	46	0.4	41
0.7	59	0.4	48
0.7	47	0.4	34
0.7	55	0.4	40
0.7	70	0.4	49
0.7	55	0.4	58
0.7	71	0.4	42
0.7	75	0.4	35
0.7	48	0.4	44
0.7	50	0.4	38
0.7	78	0.4	38
0.7	72	0.4	31
0.7	66	0.4	49
0.7	64	0.4	40
0.7	44	0.4	47
0.7	60	0.4	37
0.7	47	0.4	38
0.7	49	0.4	34
0.7	42	0.4	43
0.7	46	0.4	35
0.7	40	0.4	43
0.7	56	0.4	36
0.7	41	0.4	44
0.7	39	0.4	42
0.7	51	0.4	41
0.7	45	0.4	51
0.7	72	0.4	44
0.7	46	0.4	40
0.7	61	0.4	30
0.7	51	0.4	49
0.7	61	0.4	30
0.7	56	0.4	30
0.7	66	0.4	35
0.7	72	0.4	37
0.7	48	0.4	39
0.7	51	0.4	36
0.7	63	0.4	38
0.7	65	0.4	34
0.7	54	0.4	43
0.7	50	0.4	35
0.7	72	0.4	39
0.7	51	0.4	35
0.7	42	0.4	39
0.7	41	0.4	38
0.7	60	0.4	37
0.7	69	0.4	43
0.7	77	0.4	30
0.7	60	0.4	36
0.7	80	0.4	34
0.7	75	0.4	36
0.7	71	0.4	41
0.7	42	0.4	34
0.7	47	0.4	50
0.7	72	0.4	34
0.7	39	0.4	42
0.7	63	0.4	31
0.7	66	0.4	33
0.7	65	0.4	40
0.7	36	0.4	37
0.7	47	0.4	37
0.7	42	0.4	37
0.7	54	0.4	31
0.7	40	0.4	35
0.7	51	0.4	41
0.7	37	0.4	40
0.7	63	0.4	58
0.7	59	0.4	41
0.7	44	0.4	38
0.7	49	0.4	40
0.7	64	0.4	37
0.7	64	0.4	38
0.7	42	0.4	35
0.7	72	0.4	38
0.7	62	0.4	39
0.7	65	0.4	31
0.7	43	0.4	41
0.7	56	0.4	35
0.7	41	0.4	30
0.7	70	0.4	40
0.7	64	0.4	43
0.7	55	0.4	39
0.7	48	0.4	43
0.7	46	0.4	46
0.7	53	0.4	43
0.7	66	0.4	45
0.7	41	0.4	40
0.7	42	0.4	40
0.7	52	0.4	42
0.7	48	0.4	49
0.7	57	0.4	40
0.7	47	0.4	44
0.7	76	0.4	38
0.7	50	0.4	37
0.7	42	0.4	44
0.7	58	0.4	44
0.7	57	0.4	51
0.7	58	0.4	43
0.7	79	0.4	45
0.7	41	0.4	43
0.7	46	0.4	42
0.7	59	0.4	36
0.7	49	0.4	42
0.7	88	0.4	42
0.7	49	0.4	47
0.7	71	0.4	42
0.7	84	0.4	42
0.7	70	0.4	68
0.7	66	0.4	56
0.7	86	0.4	38
0.7	51	0.4	56
0.7	69	0.4	58
0.7	41	0.4	39
0.7	55	0.4	44
0.7	54	0.4	54
0.7	39	0.4	35
0.7	58	0.4	51
0.7	44	0.4	33
0.7	77	0.4	40
0.7	67	0.4	35
0.7	55	0.4	36
0.7	62	0.4	35
0.7	53	0.4	38
0.7	45	0.4	35
0.7	68	0.4	42
0.7	77	0.4	40
0.7	43	0.4	30
0.7	61	0.4	37
0.7	52	0.4	41
		0.4	27
		0.4	34
		0.4	43
		0.4	27
		0.4	36
		0.4	30
		0.4	34
		0.4	30
		0.4	31
		0.4	40
		0.4	27
		0.4	30
		0.4	34
		0.4	36
		0.4	28
		0.4	31
		0.4	65
		0.4	72
		0.4	57
		0.4	46
		0.4	50
		0.4	55
		0.4	54
		0.4	60
		0.4	56
		0.4	41
		0.4	48
		0.4	54
		0.4	57
		0.4	52
		0.4	44
		0.4	50
		0.4	48
		0.4	48
		0.4	52
		0.4	35
		0.4	43
		0.4	47
		0.4	50
		0.4	56
		0.4	47
		0.4	61
		0.4	41
		0.4	40
		0.4	56
		0.4	51
		0.4	50
		0.4	36
		0.4	44
		0.4	35
		0.4	50
		0.4	45
		0.4	44
		0.4	46
		0.4	53
		0.4	54
		0.4	29
		0.4	23
		0.4	24
		0.4	22
		0.4	21
		0.4	20
		0.4	41
		0.4	27
		0.4	23
		0.4	23
		0.4	24
		0.4	20
		0.4	25
		0.4	20
		0.4	26
		0.4	23
		0.4	24
		0.4	64
		0.4	48
		0.4	61
		0.4	61
		0.4	54
		0.4	66
		0.4	63
		0.4	54
		0.4	53
		0.4	49
		0.4	53
		0.4	63
		0.4	76
		0.4	58
		0.4	50
		0.4	47
		0.4	83
		0.4	47
		0.4	48
		0.4	77
		0.4	43
		0.4	73
		0.4	63
		0.4	70
		0.4	53
		0.4	60
		0.4	59
		0.4	55
		0.4	65
		0.4	53
		0.4	51
		0.4	45
		0.4	59
		0.4	56
		0.4	69
		0.4	67
		0.4	54
		0.4	46
		0.4	55
		0.4	60
		0.4	53
		0.4	62
		0.4	52
		0.4	56
		0.4	50
		0.4	40
		0.4	55
		0.4	49
		0.4	56
		0.4	73
		0.4	67
		0.4	58
		0.4	44
		0.4	49
		0.4	46
		0.4	57
		0.4	51
		0.4	53
		0.4	54
		0.4	49
		0.4	44
		0.4	37
		0.4	46
		0.4	39
		0.4	44
		0.4	40
		0.4	40
		0.4	47
		0.4	48
		0.4	57
		0.4	45
		0.4	43
		0.4	52
		0.4	40
		0.4	41
		0.4	45
		0.4	37
		0.4	45
		0.4	50
		0.4	37
		0.4	42
		0.4	47
		0.4	44
		0.45	36
		0.45	34
		0.45	37
		0.45	63
		0.45	33
		0.45	33
		0.45	37
		0.45	52
		0.45	37
		0.45	37
		0.45	37
		0.45	34
		0.45	32
		0.45	37
		0.45	38
		0.45	40
		0.45	37
		0.45	33
		0.45	35
		0.45	30
		0.45	36
		0.45	32
		0.45	40
		0.45	33
		0.45	58
		0.45	39
		0.45	41
		0.45	31
		0.45	41
		0.45	34
		0.45	39
		0.45	33
		0.45	35
		0.45	45
		0.45	37
		0.45	31
		0.45	36
		0.45	33
		0.45	39
		0.45	41
		0.45	55
		0.45	39
		0.45	33
		0.45	28
		0.45	33
		0.45	29
		0.45	31
		0.45	28
		0.45	29
		0.45	36
		0.45	30
		0.45	26
		0.45	32
		0.45	39
		0.45	30
		0.45	34
		0.45	46
		0.45	30
		0.45	29
		0.45	38
		0.45	32
		0.45	33
		0.45	32
		0.45	31
		0.45	32
		0.45	34
		0.45	31
		0.45	31
		0.45	29
		0.45	38
		0.45	36
		0.45	36
		0.45	34
		0.45	35
		0.45	28
		0.45	30
		0.45	42
		0.45	36
		0.45	41
		0.45	42
		0.45	38
		0.45	31
		0.45	29
		0.45	29
		0.45	29
		0.45	28
		0.45	31
		0.45	28
		0.45	32
		0.45	36
		0.45	31
		0.45	29
		0.45	38
		0.45	33
		0.45	38
		0.45	38
		0.45	32
		0.45	26
		0.45	28
		0.45	34
		0.45	29
		0.45	32
		0.45	36
		0.45	35
		0.45	33
		0.45	28
		0.45	30
		0.45	32
		0.45	30
		0.45	37
		0.45	40
		0.45	39
		0.45	28
		0.45	35
		0.45	41
		0.45	33
		0.45	30
		0.45	29
		0.45	45
		0.45	31
		0.45	38
		0.45	33
		0.45	31
[truncated: 976 more rows]

## Sheet: d
Formamide (%)	Fluorescence for BET867 probe and 16S rRNA gene clone of Species B (RU)	Formamide (%)	Fluorescence for NLT499 probe and 16S rRNA gene clone of Species B (RU)
0.2	221	0.2	34
0.2	231	0.2	42
0.2	228	0.2	43
0.2	231	0.2	41
0.2	233	0.2	40
0.2	228	0.2	36
0.2	232	0.2	39
0.2	230	0.2	38
0.2	229	0.2	45
0.2	219	0.2	48
0.2	221	0.2	42
0.2	225	0.2	45
0.2	228	0.2	44
0.2	234	0.2	52
0.2	223	0.2	98
0.2	220	0.2	37
0.2	224	0.2	58
0.2	228	0.2	35
0.2	223	0.2	36
0.2	221	0.2	38
0.2	222	0.2	36
0.2	216	0.2	49
0.2	190	0.2	50
0.2	225	0.2	44
0.2	223	0.2	39
0.2	219	0.2	52
0.2	216	0.2	50
0.2	226	0.2	40
0.2	220	0.2	69
0.2	226	0.2	62
0.2	217	0.2	58
0.2	224	0.2	36
0.2	215	0.2	38
0.2	220	0.2	46
0.2	215	0.2	40
0.2	220	0.2	39
0.2	179	0.2	52
0.2	232	0.2	35
0.2	178	0.2	37
0.2	227	0.2	36
0.2	234	0.2	58
0.2	230	0.2	45
0.2	231	0.2	41
0.2	224	0.2	51
0.2	227	0.2	31
0.2	223	0.2	35
0.2	226	0.2	31
0.2	223	0.2	34
0.2	227	0.2	52
0.2	234	0.2	34
0.2	230	0.2	35
0.2	227	0.2	46
0.2	231	0.2	32
0.2	223	0.2	35
0.2	222	0.2	28
0.2	222	0.2	41
0.2	225	0.2	30
0.2	222	0.2	32
0.2	220	0.2	31
0.2	207	0.2	55
0.2	239	0.2	30
0.2	233	0.2	38
0.2	239	0.2	35
0.2	237	0.2	33
0.2	238	0.2	35
0.2	236	0.2	34
0.2	202	0.2	59
0.2	240	0.2	32
0.2	233	0.2	34
0.2	234	0.2	53
0.2	239	0.2	35
0.2	233	0.2	39
0.2	234	0.2	36
0.2	231	0.2	29
0.2	235	0.2	40
0.2	229	0.2	30
0.2	235	0.2	44
0.2	232	0.2	33
0.2	234	0.2	29
0.2	224	0.2	48
0.2	219	0.2	30
0.2	237	0.2	35
0.2	240	0.2	49
0.2	228	0.2	30
0.2	222	0.2	58
0.2	215	0.2	40
0.2	213	0.2	29
0.2	212	0.2	26
0.2	230	0.2	35
0.2	201	0.2	28
0.2	222	0.2	31
0.2	219	0.2	29
0.2	221	0.2	25
0.2	230	0.2	52
0.2	218	0.2	26
0.2	210	0.2	29
0.2	222	0.2	38
0.2	214	0.2	31
0.2	220	0.2	28
0.2	233	0.2	44
0.2	222	0.2	30
0.2	231	0.2	37
0.2	225	0.2	25
0.2	236	0.2	68
0.2	230	0.2	28
0.2	225	0.2	36
0.2	221	0.2	38
0.2	220	0.2	41
0.2	228	0.2	27
0.2	214	0.2	30
0.2	218	0.2	27
0.2	228	0.2	30
0.2	222	0.2	26
0.2	231	0.2	30
0.2	139	0.2	44
0.2	228	0.2	29
0.2	215	0.2	27
0.2	221	0.2	37
0.2	191	0.2	32
0.2	202	0.2	32
0.2	227	0.2	25
0.2	220	0.2	25
0.2	213	0.2	26
0.2	231	0.2	30
0.2	218	0.2	28
0.2	221	0.25	27
0.2	234	0.25	26
0.2	210	0.25	33
0.2	225	0.25	27
0.2	216	0.25	29
0.2	239	0.25	35
0.2	227	0.25	28
0.2	222	0.25	30
0.2	213	0.25	28
0.2	230	0.25	24
0.2	223	0.25	27
0.2	214	0.25	29
0.2	218	0.25	28
0.2	205	0.25	34
0.2	222	0.25	25
0.2	204	0.25	26
0.2	212	0.25	46
0.2	218	0.25	58
0.2	234	0.25	34
0.2	224	0.25	29
0.2	218	0.25	28
0.2	220	0.25	43
0.2	217	0.25	39
0.2	220	0.25	27
0.2	203	0.25	34
0.2	215	0.25	26
0.2	211	0.25	31
0.2	203	0.25	27
0.2	222	0.25	30
0.2	198	0.25	25
0.2	203	0.25	31
0.2	210	0.25	30
0.2	181	0.25	32
0.2	213	0.25	32
0.2	208	0.25	25
0.2	219	0.25	32
0.2	208	0.25	25
0.2	210	0.25	25
0.2	209	0.25	53
0.2	207	0.25	31
0.2	215	0.25	27
0.2	205	0.25	29
0.2	176	0.25	24
0.2	209	0.25	27
0.2	210	0.25	23
0.2	207	0.25	33
0.2	211	0.25	30
0.2	209	0.25	30
0.2	134	0.25	36
0.2	203	0.25	35
0.2	209	0.25	29
0.2	153	0.25	39
0.2	218	0.25	42
0.2	223	0.25	41
0.2	228	0.25	33
0.2	228	0.25	47
0.2	232	0.25	39
0.2	225	0.25	38
0.2	230	0.25	45
0.2	196	0.25	42
0.2	231	0.25	73
0.2	223	0.25	40
0.2	218	0.25	68
0.2	219	0.25	38
0.2	229	0.25	41
0.2	234	0.25	40
0.2	228	0.25	76
0.2	224	0.25	48
0.2	217	0.25	56
0.2	220	0.25	29
0.2	217	0.25	38
0.2	225	0.25	39
0.2	212	0.25	34
0.2	215	0.25	43
0.2	196	0.25	33
0.2	218	0.25	57
0.2	177	0.25	47
0.2	203	0.25	54
0.2	234	0.25	44
0.2	206	0.25	32
0.2	226	0.25	31
0.25	205	0.25	32
0.25	207	0.25	32
0.25	201	0.25	31
0.25	204	0.25	32
0.25	202	0.25	38
0.25	211	0.25	33
0.25	202	0.25	27
0.25	214	0.25	41
0.25	209	0.25	34
0.25	203	0.25	33
0.25	205	0.25	30
0.25	211	0.25	34
0.25	211	0.25	34
0.25	218	0.25	38
0.25	213	0.25	29
0.25	199	0.25	36
0.25	218	0.25	27
0.25	205	0.25	36
0.25	207	0.25	26
0.25	214	0.25	27
0.25	207	0.25	27
0.25	225	0.25	31
0.25	212	0.25	34
0.25	213	0.25	29
0.25	209	0.25	35
0.25	207	0.25	51
0.25	208	0.25	38
0.25	216	0.25	24
0.25	212	0.25	28
0.25	204	0.25	27
0.25	207	0.25	25
0.25	200	0.25	23
0.25	206	0.25	25
0.25	212	0.25	24
0.25	202	0.25	32
0.25	180	0.25	28
0.25	191	0.25	26
0.25	181	0.25	56
0.25	209	0.25	27
0.25	184	0.25	34
0.25	183	0.25	28
0.25	186	0.25	30
0.25	192	0.25	27
0.25	181	0.25	35
0.25	199	0.25	28
0.25	197	0.25	26
0.25	190	0.25	30
0.25	198	0.25	31
0.25	200	0.25	26
0.25	143	0.25	27
0.25	188	0.25	26
0.25	212	0.25	30
0.25	194	0.25	28
0.25	196	0.25	25
0.25	192	0.25	29
0.25	193	0.25	23
0.25	191	0.25	35
0.25	189	0.25	27
0.25	213	0.25	24
0.25	208	0.25	33
0.25	211	0.25	50
0.25	211	0.25	27
0.25	208	0.25	23
0.25	206	0.25	23
0.25	209	0.25	27
0.25	215	0.25	25
0.25	203	0.25	32
0.25	220	0.25	30
0.25	210	0.25	46
0.25	213	0.25	33
0.25	212	0.25	29
0.25	221	0.25	34
0.25	140	0.25	27
0.25	226	0.25	34
0.25	214	0.25	38
0.25	210	0.25	26
0.25	207	0.25	29
0.25	215	0.25	29
0.25	219	0.25	26
0.25	211	0.25	29
0.25	213	0.25	28
0.25	216	0.25	28
0.25	201	0.25	41
0.25	202	0.25	31
0.25	212	0.25	23
0.25	197	0.25	29
0.25	216	0.25	34
0.25	203	0.25	32
0.25	211	0.25	30
0.25	223	0.25	39
0.25	214	0.25	35
0.25	226	0.25	27
0.25	218	0.25	29
0.25	215	0.25	35
0.25	155	0.3	36
0.25	213	0.3	28
0.25	221	0.3	30
0.25	212	0.3	36
0.25	213	0.3	35
0.25	198	0.3	39
0.25	208	0.3	36
0.25	210	0.3	39
0.25	217	0.3	30
0.25	212	0.3	30
0.25	203	0.3	29
0.25	198	0.3	31
0.25	211	0.3	28
0.25	222	0.3	33
0.25	216	0.3	35
0.25	224	0.3	33
0.25	166	0.3	37
0.25	216	0.3	29
0.25	217	0.3	30
0.25	213	0.3	36
0.25	209	0.3	37
0.25	223	0.3	32
0.25	212	0.3	41
0.25	217	0.3	37
0.25	219	0.3	44
0.25	214	0.3	31
0.25	206	0.3	35
0.25	213	0.3	34
0.25	210	0.3	38
0.25	223	0.3	33
0.25	216	0.3	31
0.3	220	0.3	32
0.3	217	0.3	28
0.3	220	0.3	38
0.3	221	0.3	29
0.3	219	0.3	31
0.3	222	0.3	30
0.3	216	0.3	30
0.3	231	0.3	35
0.3	210	0.3	33
0.3	213	0.3	33
0.3	218	0.3	25
0.3	214	0.3	38
0.3	218	0.3	27
0.3	216	0.3	34
0.3	226	0.3	33
0.3	228	0.3	34
0.3	227	0.3	48
0.3	232	0.3	68
0.3	232	0.3	31
0.3	228	0.3	52
0.3	217	0.3	42
0.3	221	0.3	34
0.3	221	0.3	30
0.3	200	0.3	46
0.3	215	0.3	38
0.3	220	0.3	34
0.3	223	0.3	30
0.3	222	0.3	36
0.3	225	0.3	30
0.3	204	0.3	43
0.3	212	0.3	39
0.3	216	0.3	35
0.3	217	0.3	48
0.3	228	0.3	42
0.3	218	0.3	35
0.3	219	0.3	34
0.3	228	0.3	30
0.3	227	0.3	41
0.3	230	0.3	34
0.3	161	0.3	47
0.3	216	0.3	41
0.3	223	0.3	32
0.3	232	0.3	34
0.3	214	0.3	42
0.3	139	0.3	34
0.3	206	0.3	34
0.3	213	0.3	32
0.3	189	0.3	56
0.3	219	0.3	37
0.3	221	0.3	33
0.3	223	0.3	37
0.3	232	0.3	39
0.3	216	0.3	43
0.3	199	0.3	30
0.3	227	0.3	29
0.3	207	0.3	32
0.3	209	0.3	32
0.3	212	0.3	35
0.3	160	0.3	26
0.3	224	0.3	26
0.3	226	0.3	31
0.3	209	0.3	32
0.3	210	0.3	29
0.3	217	0.3	41
0.3	215	0.3	29
0.3	218	0.3	33
0.3	212	0.3	27
0.3	213	0.3	33
0.3	209	0.3	34
0.3	214	0.3	30
0.3	219	0.3	30
0.3	218	0.3	27
0.3	223	0.3	26
0.3	213	0.3	31
0.3	207	0.3	30
0.3	215	0.3	25
0.3	204	0.3	31
0.3	200	0.3	29
0.3	209	0.3	27
0.3	200	0.3	28
0.3	205	0.3	35
0.3	198	0.3	30
0.3	206	0.3	26
0.3	204	0.3	26
0.3	202	0.3	29
0.3	219	0.35	30
0.3	197	0.35	27
0.3	203	0.35	28
0.3	214	0.35	35
0.3	201	0.35	35
0.3	225	0.35	48
0.3	229	0.35	33
0.3	212	0.35	35
0.3	229	0.35	30
0.3	209	0.35	32
0.3	199	0.35	26
0.3	226	0.35	47
0.3	208	0.35	34
0.3	202	0.35	42
0.3	156	0.35	32
0.3	222	0.35	32
0.3	201	0.35	41
0.3	204	0.35	28
0.3	202	0.35	25
0.3	201	0.35	34
0.3	200	0.35	29
0.3	204	0.35	26
0.3	203	0.35	36
0.3	203	0.35	31
0.3	208	0.35	27
0.35	223	0.35	32
0.35	212	0.35	29
0.35	219	0.35	34
0.35	215	0.35	26
0.35	210	0.35	34
0.35	212	0.35	27
0.35	223	0.35	27
0.35	219	0.35	30
0.35	208	0.35	28
0.35	211	0.35	34
0.35	220	0.35	29
0.35	227	0.35	31
0.35	229	0.35	29
0.35	208	0.35	33
0.35	226	0.35	32
0.35	176	0.35	30
0.35	204	0.35	33
0.35	227	0.35	31
0.35	204	0.35	41
0.35	208	0.35	25
0.35	207	0.35	28
0.35	229	0.35	30
0.35	228	0.35	30
0.35	213	0.35	30
0.35	229	0.35	34
0.35	225	0.35	32
0.35	213	0.35	33
0.35	222	0.35	29
0.35	233	0.35	52
0.35	219	0.35	26
0.35	232	0.35	46
0.35	225	0.35	23
0.35	148	0.35	33
0.35	228	0.35	27
0.35	224	0.35	26
0.35	225	0.35	28
0.35	209	0.35	28
0.35	209	0.35	27
0.35	222	0.35	25
0.35	154	0.35	23
0.35	227	0.35	28
0.35	220	0.35	22
0.35	221	0.35	26
0.35	216	0.35	27
0.35	230	0.35	30
0.35	218	0.35	24
0.35	220	0.35	27
0.35	189	0.35	23
0.35	233	0.35	30
0.35	231	0.35	22
0.35	232	0.35	24
0.35	230	0.35	27
0.35	230	0.35	25
0.35	226	0.35	23
0.35	234	0.35	26
0.35	233	0.35	24
0.35	208	0.35	35
0.35	228	0.35	23
0.35	230	0.35	20
0.35	222	0.35	28
0.35	235	0.35	22
0.35	231	0.35	22
0.35	224	0.35	23
0.35	229	0.35	25
0.35	231	0.35	22
0.35	228	0.35	23
0.35	213	0.35	41
0.35	224	0.35	29
0.35	226	0.35	36
0.35	218	0.35	37
0.35	223	0.35	26
0.35	217	0.35	28
0.35	217	0.35	34
0.35	211	0.35	35
0.35	210	0.35	26
0.35	135	0.35	33
0.35	218	0.35	56
0.35	218	0.35	31
0.35	220	0.35	32
0.35	229	0.35	30
0.35	226	0.35	25
0.35	214	0.35	40
0.35	216	0.35	30
0.35	215	0.35	30
0.35	189	0.35	28
0.35	223	0.35	27
0.35	185	0.35	27
0.35	224	0.35	25
0.35	210	0.35	28
0.35	213	0.35	30
0.35	225	0.35	28
0.35	224	0.35	28
0.35	213	0.35	24
0.35	216	0.35	29
0.35	207	0.35	30
0.35	219	0.35	28
0.35	203	0.35	34
0.35	209	0.35	23
0.35	229	0.35	25
0.35	221	0.35	23
0.35	223	0.35	24
0.35	210	0.35	22
0.35	202	0.35	23
0.35	176	0.35	20
0.35	223	0.35	25
0.35	230	0.35	23
0.35	210	0.35	22
0.35	204	0.35	24
0.35	220	0.35	31
0.35	225	0.35	20
0.35	218	0.35	24
0.35	211	0.35	24
0.35	216	0.35	28
0.35	180	0.35	26
0.35	233	0.35	19
0.35	219	0.35	21
0.35	223	0.35	24
0.35	223	0.35	26
0.35	217	0.35	24
0.35	223	0.35	20
0.35	217	0.35	31
0.35	220	0.35	23
0.35	219	0.35	27
0.35	232	0.35	28
0.35	216	0.35	31
0.35	220	0.35	36
0.35	203	0.35	26
0.35	225	0.35	36
0.35	215	0.35	31
0.35	204	0.35	39
0.35	230	0.35	36
0.35	219	0.35	34
0.35	233	0.35	33
0.35	214	0.35	32
0.35	230	0.35	28
0.35	231	0.35	33
0.35	220	0.35	36
0.35	224	0.35	35
0.35	230	0.35	28
0.35	226	0.35	37
0.35	230	0.35	26
0.35	217	0.35	29
0.35	204	0.35	31
0.35	227	0.35	28
0.35	226	0.35	33
0.35	211	0.35	26
0.35	211	0.35	28
0.35	201	0.35	25
0.35	228	0.35	36
0.35	178	0.35	28
0.35	226	0.35	30
0.35	214	0.35	27
0.35	231	0.35	25
0.35	219	0.35	32
0.35	223	0.35	30
0.35	222	0.35	26
0.35	215	0.35	28
0.35	203	0.35	23
0.35	152	0.35	26
0.35	214	0.35	33
0.35	213	0.35	30
0.35	226	0.35	27
0.35	207	0.35	22
0.35	215	0.35	28
0.35	206	0.35	23
0.35	228	0.35	31
0.35	211	0.35	25
0.35	218	0.35	23
0.35	206	0.35	26
0.35	229	0.35	42
0.35	208	0.35	24
0.35	203	0.35	35
0.35	222	0.35	30
0.35	214	0.35	28
0.35	217	0.35	28
0.35	209	0.35	24
0.35	219	0.35	24
0.35	215	0.35	24
0.35	211	0.35	27
0.35	190	0.35	22
0.35	215	0.35	22
0.35	215	0.35	25
0.35	216	0.35	27
0.35	221	0.35	23
0.35	204	0.35	33
0.35	213	0.35	30
0.35	214	0.35	22
0.35	216	0.35	30
0.35	211	0.35	26
0.35	207	0.35	26
0.35	223	0.35	26
0.35	193	0.35	25
0.35	220	0.35	31
0.35	229	0.35	33
0.35	220	0.35	41
0.35	218	0.35	37
0.35	230	0.35	36
0.35	226	0.35	31
0.35	223	0.35	39
0.35	216	0.35	39
0.35	210	0.35	35
0.35	205	0.35	36
0.35	215	0.35	39
0.35	221	0.35	31
0.35	235	0.35	34
0.35	232	0.35	38
0.35	213	0.35	47
0.35	200	0.35	50
0.35	227	0.35	31
0.35	212	0.35	32
0.35	230	0.35	34
0.35	204	0.35	29
0.35	213	0.35	42
0.35	143	0.35	32
0.35	211	0.35	27
0.35	207	0.35	40
0.35	203	0.35	28
0.35	221	0.35	48
0.35	208	0.35	37
0.35	214	0.35	28
0.35	223	0.35	29
0.35	227	0.35	41
0.35	198	0.35	29
0.35	218	0.35	55
0.35	221	0.35	28
0.35	228	0.35	27
0.35	227	0.35	29
0.35	200	0.35	33
0.35	228	0.35	55
0.35	227	0.35	35
0.35	216	0.35	34
0.35	229	0.35	33
0.35	227	0.35	50
0.35	220	0.35	44
0.35	146	0.35	43
0.35	224	0.35	29
0.35	222	0.35	37
0.35	226	0.35	29
0.35	225	0.35	28
0.35	230	0.35	28
0.35	234	0.35	39
0.35	228	0.35	28
0.35	212	0.35	27
0.35	229	0.35	32
0.35	217	0.35	24
0.35	159	0.35	27
0.35	223	0.35	27
0.4	217	0.35	33
0.4	214	0.35	35
0.4	223	0.35	35
0.4	226	0.35	37
0.4	229	0.35	24
0.4	229	0.35	30
0.4	222	0.35	27
0.4	205	0.4	42
0.4	227	0.4	34
0.4	228	0.4	46
0.4	202	0.4	33
0.4	201	0.4	42
0.4	220	0.4	39
0.4	215	0.4	34
0.4	224	0.4	34
0.4	216	0.4	47
0.4	226	0.4	41
0.4	173	0.4	43
0.4	224	0.4	33
0.4	229	0.4	41
0.4	207	0.4	34
0.4	230	0.4	36
0.4	161	0.4	37
0.4	209	0.4	36
0.4	223	0.4	33
0.4	228	0.4	33
0.4	225	0.4	40
0.4	222	0.4	36
0.4	224	0.4	39
0.4	221	0.4	36
0.4	174	0.4	31
0.4	229	0.4	42
0.4	230	0.4	37
0.4	204	0.4	33
0.4	228	0.4	39
0.4	211	0.4	39
0.4	217	0.4	45
0.4	227	0.4	37
0.4	226	0.4	45
0.4	217	0.4	32
0.4	226	0.4	44
0.4	215	0.4	36
0.4	223	0.4	38
0.4	206	0.4	34
0.4	219	0.4	39
0.4	200	0.4	33
0.4	227	0.4	38
0.4	213	0.4	33
0.4	217	0.4	37
0.4	220	0.4	34
0.4	223	0.4	54
0.4	229	0.4	48
0.4	218	0.4	28
0.4	227	0.4	33
0.4	191	0.4	30
0.4	218	0.4	34
0.4	186	0.4	44
0.4	221	0.4	36
0.4	215	0.4	35
0.4	209	0.4	37
0.4	219	0.4	35
0.4	224	0.4	43
0.4	230	0.4	32
0.4	222	0.4	41
0.4	220	0.4	38
0.4	194	0.4	37
0.4	220	0.4	39
0.4	193	0.4	35
0.4	216	0.4	34
0.4	221	0.4	29
0.4	215	0.4	37
0.4	215	0.4	28
0.4	215	0.4	35
0.4	224	0.4	38
0.4	229	0.4	49
0.4	226	0.4	32
0.4	231	0.4	30
0.4	196	0.4	29
0.4	218	0.4	33
0.4	224	0.4	32
0.4	217	0.4	38
0.4	184	0.4	30
0.4	229	0.4	34
0.4	235	0.4	40
0.4	222	0.4	31
0.4	186	0.4	32
0.4	135	0.4	35
0.4	226	0.4	51
0.4	218	0.4	30
0.4	201	0.4	29
0.4	216	0.4	32
0.4	215	0.4	33
0.4	223	0.4	33
0.4	212	0.4	32
0.4	220	0.4	26
0.4	224	0.4	26
0.4	219	0.4	34
0.4	220	0.4	34
0.4	221	0.4	30
0.4	165	0.4	31
0.4	221	0.4	26
0.4	178	0.4	36
0.4	206	0.4	40
0.4	201	0.4	35
0.45	223	0.4	35
0.45	215	0.4	28
0.45	223	0.4	29
0.45	188	0.4	32
0.45	224	0.4	25
0.45	199	0.4	33
0.45	198	0.4	28
0.45	175	0.4	31
0.45	207	0.4	47
0.45	190	0.4	35
0.45	142	0.4	30
0.45	182	0.4	27
0.45	199	0.4	35
0.45	208	0.4	30
0.45	193	0.4	30
0.45	120	0.4	32
0.45	214	0.4	28
0.45	170	0.4	36
0.45	179	0.4	31
0.45	206	0.4	31
0.45	201	0.4	38
0.45	204	0.4	30
0.45	193	0.4	34
0.45	195	0.4	33
0.45	201	0.4	27
0.45	183	0.4	28
0.45	147	0.4	27
0.45	190	0.4	29
0.45	192	0.4	41
0.45	151	0.4	37
0.45	203	0.4	30
0.45	226	0.4	34
0.45	188	0.4	36
0.45	199	0.4	35
0.45	231	0.4	41
0.45	224	0.4	38
0.45	197	0.4	31
0.45	216	0.4	29
0.45	200	0.4	37
0.45	195	0.4	31
0.45	187	0.4	37
0.45	214	0.4	33
0.45	219	0.4	35
0.45	217	0.4	35
0.45	218	0.4	28
0.45	225	0.4	36
0.45	188	0.4	33
0.45	218	0.4	33
0.45	219	0.4	29
0.45	225	0.4	41
0.45	217	0.4	32
0.45	223	0.4	36
0.45	223	0.4	36
0.45	163	0.4	29
0.45	222	0.4	32
0.45	219	0.4	30
0.45	212	0.4	41
0.45	213	0.4	39
0.45	207	0.4	29
0.45	194	0.4	36
0.45	200	0.4	37
0.45	219	0.4	32
0.45	195	0.4	32
0.45	169	0.4	29
0.45	213	0.4	35
0.45	214	0.4	30
0.45	145	0.4	28
0.45	145	0.4	29
0.45	177	0.4	28
0.45	219	0.4	38
0.45	215	0.4	31
0.45	219	0.4	50
0.45	221	0.4	36
0.45	229	0.4	40
0.45	227	0.4	38
0.45	216	0.4	50
0.45	177	0.4	48
0.45	211	0.4	40
0.45	147	0.4	45
0.45	217	0.4	51
0.45	210	0.4	45
0.45	223	0.4	40
0.45	207	0.4	49
0.45	227	0.4	46
0.45	217	0.4	48
0.45	218	0.4	44
0.45	216	0.4	48
0.45	211	0.4	64
0.45	195	0.4	43
0.45	228	0.4	43
0.45	225	0.4	41
0.45	225	0.4	41
0.45	146	0.4	39
0.45	207	0.4	47
0.45	202	0.4	45
0.45	173	0.4	41
0.45	218	0.4	38
0.45	221	0.4	40
0.45	218	0.4	41
0.45	220	0.4	40
0.45	197	0.4	38
0.45	230	0.4	36
0.45	222	0.4	50
0.45	215	0.4	45
0.45	223	0.4	40
0.45	215	0.4	44
0.45	221	0.4	32
0.45	207	0.4	25
0.45	216	0.4	32
0.45	213	0.4	30
0.45	166	0.4	39
0.45	213	0.4	29
0.45	210	0.4	34
0.45	183	0.4	31
0.45	203	0.4	29
0.45	214	0.4	41
0.45	209	0.4	30
0.45	202	0.4	26
0.45	180	0.4	30
0.45	188	0.4	28
0.45	218	0.4	31
0.45	223	0.4	33
0.45	230	0.4	27
0.45	197	0.4	24
0.45	218	0.4	28
0.45	221	0.4	31
0.45	227	0.4	28
0.45	231	0.4	35
0.45	222	0.4	25
0.45	197	0.4	41
0.45	231	0.4	38
0.45	234	0.4	42
0.45	237	0.4	38
0.45	220	0.4	42
0.45	232	0.4	45
0.45	227	0.4	43
0.45	193	0.4	43
0.45	231	0.4	58
0.45	226	0.4	49
0.45	234	0.4	37
0.45	226	0.4	45
0.45	232	0.4	42
0.45	222	0.4	47
0.45	213	0.4	47
0.45	225	0.4	41
0.45	233	0.4	41
0.45	233	0.4	52
0.45	217	0.4	37
0.45	231	0.4	38
0.45	233	0.4	35
0.45	232	0.4	41
0.45	236	0.4	40
0.45	231	0.4	39
0.45	230	0.4	45
0.45	146	0.4	44
0.45	213	0.4	52
0.45	219	0.4	39
0.45	230	0.4	42
0.45	232	0.4	44
0.45	231	0.4	31
0.45	216	0.4	40
0.45	232	0.4	30
0.45	215	0.4	37
0.45	226	0.4	28
0.45	224	0.4	47
0.45	236	0.4	34
0.45	234	0.4	42
0.45	231	0.4	32
0.45	230	0.4	41
0.45	227	0.4	41
0.45	223	0.4	36
0.45	234	0.4	36
0.45	234	0.4	42
0.45	208	0.4	38
0.45	222	0.4	40
0.45	225	0.4	41
0.45	220	0.4	31
0.45	224	0.4	45
0.45	212	0.4	30
0.45	226	0.4	39
0.45	220	0.4	39
0.45	178	0.4	46
0.45	232	0.4	36
0.45	233	0.4	36
0.45	231	0.4	47
0.45	231	0.4	36
0.5	171	0.4	43
0.5	156	0.4	38
0.5	141	0.4	46
0.5	193	0.4	42
0.5	175	0.4	42
0.5	156	0.4	40
0.5	183	0.4	37
0.5	205	0.4	36
0.5	193	0.4	50
0.5	211	0.4	41
0.5	172	0.4	36
0.5	112	0.4	37
0.5	122	0.4	39
0.5	175	0.4	49
0.5	143	0.4	44
0.5	203	0.4	35
0.5	144	0.4	49
0.5	142	0.4	36
0.5	195	0.4	45
0.5	185	0.4	39
0.5	163	0.4	41
0.5	153	0.4	37
0.5	182	0.4	39
0.5	153	0.4	36
0.5	222	0.4	34
0.5	175	0.4	37
0.5	114	0.4	37
0.5	133	0.4	46
0.5	168	0.4	48
0.5	161	0.4	40
0.5	186	0.4	41
0.5	142	0.4	32
0.5	196	0.4	29
0.5	189	0.4	36
0.5	186	0.4	38
0.5	205	0.4	30
0.5	125	0.4	26
0.5	126	0.4	28
0.5	174	0.4	30
0.5	181	0.4	33
0.5	138	0.4	28
0.5	191	0.4	30
0.5	214	0.4	43
0.5	188	0.4	40
0.5	210	0.4	32
0.5	131	0.4	34
0.5	189	0.4	31
0.5	149	0.4	30
0.5	184	0.4	32
0.5	165	0.4	31
0.5	141	0.4	30
0.5	204	0.4	32
0.5	132	0.4	29
0.5	120	0.4	28
0.5	187	0.4	30
0.5	189	0.4	30
0.5	174	0.4	31
0.5	213	0.4	27
0.5	111	0.4	29
0.5	185	0.4	33
0.5	176	0.45	33
0.5	132	0.45	32
0.5	161	0.45	26
0.5	126	0.45	27
0.5	182	0.45	27
0.5	142	0.45	30
0.5	148	0.45	28
0.5	106	0.45	33
0.5	125	0.45	32
0.5	99	0.45	26
0.5	116	0.45	31
0.5	126	0.45	28
0.5	94	0.45	29
0.5	96	0.45	31
0.5	65	0.45	27
0.5	97	0.45	42
0.5	91	0.45	26
0.5	95	0.45	27
0.5	87	0.45	31
0.5	117	0.45	26
0.5	112	0.45	25
0.5	167	0.45	25
0.5	102	0.45	25
0.5	183	0.45	28
0.5	116	0.45	25
0.5	128	0.45	26
0.5	106	0.45	31
0.5	177	0.45	26
0.5	126	0.45	25
0.5	186	0.45	26
0.5	127	0.45	30
0.5	126	0.45	22
0.5	146	0.45	26
0.5	100	0.45	26
0.5	108	0.45	26
0.5	141	0.45	29
0.5	168	0.45	44
0.5	127	0.45	45
0.5	127	0.45	35
0.5	160	0.45	35
0.5	145	0.45	42
0.5	167	0.45	35
0.5	127	0.45	34
0.5	127	0.45	38
0.5	132	0.45	36
0.5	89	0.45	37
0.5	202	0.45	46
0.5	148	0.45	41
0.5	115	0.45	39
0.5	161	0.45	37
0.5	186	0.45	41
0.5	155	0.45	37
0.5	139	0.45	39
0.5	165	0.45	43
0.5	128	0.45	39
0.5	166	0.45	47
0.5	144	0.45	45
0.5	159	0.45	39
0.5	184	0.45	39
0.5	152	0.45	39
0.5	168	0.45	38
0.5	145	0.45	47
0.5	182	0.45	56
0.5	150	0.45	46
0.5	180	0.45	37
0.5	130	0.45	46
0.5	160	0.45	49
0.5	159	0.45	44
0.5	154	0.45	35
0.5	128	0.45	48
0.5	181	0.45	32
0.5	187	0.45	36
0.5	136	0.45	35
0.5	154	0.45	43
0.5	191	0.45	39
0.5	98	0.45	35
0.5	198	0.45	30
0.5	179	0.45	34
0.5	156	0.45	46
0.5	139	0.45	48
0.5	194	0.45	42
0.5	170	0.45	43
0.5	114	0.45	35
0.5	132	0.45	38
0.5	124	0.45	29
0.5	205	0.45	54
0.5	187	0.45	34
0.5	177	0.45	31
0.5	174	0.45	35
0.5	135	0.45	33
0.5	135	0.45	34
0.5	141	0.45	31
0.5	189	0.45	32
0.5	141	0.45	28
0.5	196	0.45	30
0.5	130	0.45	33
0.5	119	0.45	29
0.5	162	0.45	30
0.5	180	0.45	33
0.5	146	0.45	24
0.5	179	0.45	37
0.5	93	0.45	39
0.5	136	0.45	30
0.5	109	0.45	35
0.5	108	0.45	34
0.5	116	0.45	30
0.5	182	0.45	31
0.5	113	0.45	26
0.5	173	0.45	30
0.5	137	0.45	23
0.5	159	0.45	28
0.5	147	0.45	28
0.5	177	0.45	28
0.5	135	0.45	40
0.5	154	0.45	30
0.5	142	0.45	37
0.5	179	0.45	48
0.5	120	0.45	42
0.5	96	0.45	42
0.5	119	0.45	37
0.5	157	0.45	45
0.5	157	0.45	35
0.5	148	0.45	44
0.5	128	0.45	41
0.5	152	0.45	36
0.5	138	0.45	46
0.5	149	0.45	43
0.5	101	0.45	34
0.5	123	0.45	35
0.5	155	0.45	46
0.5	128	0.45	34
0.5	193	0.45	35
0.5	112	0.45	44
0.5	153	0.45	42
0.5	148	0.45	36
0.5	154	0.45	39
0.5	122	0.45	32
0.5	161	0.45	40
0.5	138	0.45	53
0.5	182	0.45	49
0.5	125	0.45	32
0.5	149	0.45	39
0.5	138	0.45	37
0.5	98	0.45	37
0.6	105	0.45	37
0.6	83	0.45	35
0.6	84	0.45	39
0.6	106	0.45	38
0.6	75	0.45	36
0.6	77	0.45	39
0.6	96	0.45	52
0.6	94	0.45	33
0.6	80	0.45	37
0.6	91	0.45	41
0.6	98	0.45	41
0.6	79	0.45	35
0.6	147	0.45	36
0.6	136	0.45	32
0.6	143	0.45	39
0.6	90	0.45	36
0.6	83	0.45	33
0.6	80	0.45	34
0.6	103	0.45	41
0.6	107	0.45	35
0.6	85	0.45	33
0.6	78	0.45	35
0.6	81	0.45	41
0.6	82	0.45	37
0.6	102	0.45	30
0.6	90	0.45	37
0.6	99	0.45	34
0.6	76	0.45	33
0.6	81	0.45	35
0.6	108	0.45	38
0.6	110	0.45	40
0.6	112	0.45	34
0.6	100	0.45	40
0.6	131	0.45	37
0.6	118	0.45	34
0.6	122	0.45	34
0.6	118	0.45	40
0.6	105	0.45	35
0.6	89	0.45	33
0.6	71	0.45	34
0.6	90	0.45	40
0.6	77	0.45	39
0.6	88	0.45	35
0.6	116	0.45	42
0.6	98	0.45	40
0.6	84	0.45	41
0.6	71	0.45	38
0.6	121	0.45	34
0.6	80	0.45	46
0.6	125	0.45	34
0.6	79	0.45	38
0.6	106	0.45	34
0.6	124	0.45	43
0.6	114	0.45	38
0.6	87	0.45	32
0.6	97	0.45	40
0.6	100	0.45	33
0.6	102	0.45	44
0.6	71	0.45	39
0.6	98	0.45	31
0.6	116	0.45	35
0.6	109	0.45	34
0.6	117	0.45	41
0.6	83	0.45	37
0.6	135	0.45	36
0.6	84	0.45	38
0.6	129	0.45	35
0.6	139	0.45	33
0.6	98	0.45	29
0.6	94	0.45	38
0.6	117	0.45	34
0.6	124	0.45	30
0.6	76	0.45	38
0.6	68	0.45	39
0.6	117	0.45	50
0.6	86	0.45	34
0.6	95	0.45	32
0.6	65	0.45	42
0.6	105	0.45	42
0.6	93	0.45	36
0.6	72	0.45	59
0.6	111	0.45	43
0.6	123	0.45	55
0.6	80	0.45	52
0.6	108	0.45	49
0.6	113	0.45	50
0.6	126	0.45	38
0.6	135	0.45	47
0.6	119	0.45	35
0.6	93	0.45	45
0.6	94	0.45	48
0.6	121	0.45	43
0.6	144	0.45	48
0.6	116	0.45	42
0.6	110	0.45	43
0.6	107	0.45	38
0.6	109	0.45	36
0.7	70	0.45	48
0.7	57	0.45	35
0.7	41	0.45	45
0.7	61	0.45	43
0.7	46	0.45	42
0.7	42	0.45	37
0.7	55	0.45	44
0.7	34	0.45	38
0.7	58	0.45	41
0.7	61	0.45	39
0.7	51	0.45	27
0.7	39	0.45	39
0.7	56	0.45	31
0.7	56	0.45	35
0.7	84	0.45	33
0.7	102	0.45	33
0.7	88	0.45	42
0.7	75	0.45	34
0.7	124	0.45	36
0.7	91	0.45	33
0.7	103	0.45	37
0.7	64	0.45	40
0.7	93	0.45	30
0.7	88	0.45	37
0.7	89	0.45	33
0.7	113	0.45	33
0.7	87	0.45	36
0.7	71	0.45	32
0.7	85	0.45	32
0.7	64	0.45	35
0.7	89	0.45	30
0.7	68	0.45	32
0.7	73	0.45	28
0.7	92	0.45	26
0.7	121	0.45	42
0.7	80	0.45	28
0.7	98	0.45	32
0.7	120	0.45	33
0.7	89	0.45	33
0.7	88	0.5	33
0.7	117	0.5	37
0.7	77	0.5	31
0.7	101	0.5	32
0.7	92	0.5	29
0.7	95	0.5	34
0.7	117	0.5	28
0.7	93	0.5	37
0.7	64	0.5	26
0.7	95	0.5	34
0.7	113	0.5	48
0.7	93	0.5	34
0.7	100	0.5	24
0.7	102	0.5	32
0.7	88	0.5	31
0.7	97	0.5	35
0.7	71	0.5	28
0.7	89	0.5	31
0.7	91	0.5	29
0.7	96	0.5	31
0.7	66	0.5	27
0.7	82	0.5	26
0.7	71	0.5	28
0.7	80	0.5	28
0.7	67	0.5	31
0.7	111	0.5	47
0.7	77	0.5	36
0.7	68	0.5	50
0.7	78	0.5	34
0.7	71	0.5	32
0.7	89	0.5	31
0.7	115	0.5	41
0.7	61	0.5	30
0.7	90	0.5	39
0.7	100	0.5	39
0.7	92	0.5	38
0.7	106	0.5	54
0.7	86	0.5	35
0.7	85	0.5	40
0.7	91	0.5	38
0.7	99	0.5	36
0.7	100	0.5	52
0.7	95	0.5	31
0.7	93	0.5	33
0.7	95	0.5	37
0.7	102	0.5	35
0.7	58	0.5	45
0.7	76	0.5	32
0.7	78	0.5	35
0.7	66	0.5	35
0.7	69	0.5	38
0.7	66	0.5	38
0.7	56	0.5	39
0.7	75	0.5	44
0.7	89	0.5	29
0.7	89	0.5	32
0.7	80	0.5	37
0.7	74	0.5	36
0.7	85	0.5	32
0.7	100	0.5	30
0.7	107	0.5	34
0.7	80	0.5	41
0.7	93	0.5	35
0.7	80	0.5	40
0.7	69	0.5	34
0.7	80	0.5	54
0.7	87	0.5	33
0.7	67	0.5	29
0.7	87	0.5	26
0.7	67	0.5	28
0.7	46	0.5	28
0.7	68	0.5	29
0.7	78	0.5	28
0.7	91	0.5	27
0.7	45	0.5	28
0.7	73	0.5	27
0.7	46	0.5	29
0.7	69	0.5	35
0.7	55	0.5	34
0.7	52	0.5	26
0.7	60	0.5	30
0.7	45	0.5	32
0.7	78	0.5	33
0.7	61	0.5	31
0.7	55	0.5	35
0.7	64	0.5	36
0.7	47	0.5	31
0.7	52	0.5	32
0.7	56	0.5	29
0.7	41	0.5	37
0.7	68	0.5	31
0.7	70	0.5	28
0.7	57	0.5	42
0.7	45	0.5	30
0.7	67	0.5	29
0.7	42	0.5	43
0.7	81	0.5	35
0.7	73	0.5	35
0.7	45	0.5	29
0.7	72	0.5	40
0.7	51	0.5	33
0.7	76	0.5	28
0.7	64	0.5	32
0.7	62	0.5	33
0.7	67	0.5	42
0.7	61	0.5	31
0.7	77	0.5	30
0.7	42	0.5	27
0.7	55	0.5	37
0.7	59	0.5	27
0.7	66	0.5	27
0.7	40	0.5	27
0.7	41	0.5	32
0.7	55	0.5	28
0.7	76	0.5	31
0.7	64	0.5	42
0.7	79	0.5	32
0.7	83	0.5	38
0.7	88	0.5	40
0.7	77	0.5	51
0.7	84	0.5	55
0.7	64	0.5	40
0.7	67	0.5	33
0.7	75	0.5	36
0.7	68	0.5	44
0.7	59	0.5	33
0.7	53	0.5	42
0.7	79	0.5	53
		0.5	41
		0.5	41
		0.5	37
		0.5	45
		0.5	41
		0.5	37
		0.5	38
		0.5	40
		0.5	39
		0.5	35
		0.5	58
		0.5	41
		0.5	39
		0.5	38
		0.5	34
		0.5	33
		0.5	33
		0.5	40
		0.5	40
		0.5	41
		0.5	37
		0.5	31
		0.5	44
		0.5	43
		0.5	35
		0.5	36
		0.5	34
		0.5	34
		0.5	33
		0.5	41
		0.5	40
		0.5	36
		0.5	42
		0.5	45
		0.5	39
		0.5	36
		0.5	34
		0.5	37
		0.5	41
		0.5	38
		0.5	39
		0.5	42
		0.5	41
		0.5	40
		0.5	37
		0.5	34
		0.5	41
		0.5	40
		0.5	45
		0.5	38
		0.5	38
		0.5	33
		0.5	58
		0.5	48
		0.5	42
		0.5	43
		0.5	41
		0.5	36
		0.5	43
		0.5	34
		0.5	35
		0.5	61
		0.5	39
		0.5	42
		0.5	37
		0.5	32
		0.5	35
		0.5	43
		0.5	44
		0.5	35
		0.5	43
		0.5	39
		0.5	38
		0.5	37
		0.5	41
		0.5	36
		0.5	44
		0.5	36
		0.5	38
		0.5	36
		0.5	36
		0.5	37
		0.5	41
		0.5	34
		0.5	38
		0.5	32
		0.5	37
		0.5	37
		0.5	41
		0.5	38
		0.5	43
		0.5	33
		0.5	38
		0.5	34
		0.5	34
		0.5	34
		0.5	40
		0.5	39
		0.5	41
		0.5	40
		0.5	39
		0.5	39
		0.5	36
		0.5	45
		0.5	30
		0.5	42
		0.5	39
		0.5	39
		0.5	38
		0.5	56
		0.5	41
		0.5	31
		0.5	41
		0.5	40
		0.5	34
		0.5	51
		0.5	53
		0.5	40
		0.5	39
		0.5	37
		0.5	43
		0.5	45
		0.5	39
		0.5	40
		0.5	41
		0.5	43
		0.5	40
		0.5	35
		0.5	49
		0.5	42
		0.5	30
		0.5	37
		0.5	47
		0.5	39
		0.5	38
		0.5	43
		0.5	50
		0.5	41
		0.5	56
		0.5	41
		0.5	41
		0.5	41
		0.5	38
		0.5	32
		0.5	35
		0.5	44
		0.5	46
		0.5	43
		0.5	35
		0.5	36
		0.5	34
		0.5	39
		0.5	33
		0.5	40
		0.5	40
		0.5	42
		0.5	39
		0.5	39
		0.5	37
		0.5	37
		0.5	41
		0.5	36
		0.5	34
		0.5	43
		0.5	55
		0.5	36
		0.5	40
		0.5	36
		0.5	36
		0.5	32
		0.5	36
		0.5	48
		0.5	41
		0.5	40
		0.5	45
		0.5	38
		0.5	42
		0.5	40
		0.5	41
		0.5	38
		0.5	39
		0.5	39
		0.5	40
		0.6	186
		0.6	32
		0.6	30
		0.6	41
		0.6	35
		0.6	41
		0.6	34
		0.6	34
		0.6	32
		0.6	48
		0.6	34
		0.6	31
		0.6	28
		0.6	27
		0.6	42
		0.6	29
		0.6	39
		0.6	29
		0.6	28
		0.6	30
		0.6	43
		0.6	28
		0.6	38
		0.6	27
		0.6	35
		0.6	28
		0.6	29
		0.6	32
		0.6	39
		0.6	26
		0.6	28
		0.6	30
		0.6	27
		0.6	26
		0.6	33
		0.6	37
		0.6	26
		0.6	25
		0.6	30
		0.6	28
		0.6	32
		0.6	34
		0.6	29
		0.6	29
		0.6	28
		0.6	34
		0.6	34
		0.6	29
		0.6	32
		0.6	34
		0.6	28
		0.6	31
		0.6	28
		0.6	35
		0.6	28
		0.6	27
		0.6	33
		0.6	27
		0.6	30
		0.6	28
		0.6	22
		0.6	21
		0.6	24
		0.6	29
		0.6	22
		0.6	26
		0.6	27
		0.6	21
		0.6	20
		0.6	20
		0.6	24
		0.6	23
		0.6	24
		0.6	24
		0.6	23
		0.6	25
		0.6	20
		0.6	23
		0.6	26
		0.6	19
		0.6	21
		0.6	22
		0.6	20
		0.6	20
		0.6	19
		0.6	26
		0.6	23
		0.6	19
		0.6	21
		0.6	21
		0.6	19
		0.6	21
		0.6	17
		0.6	21
		0.6	21
		0.6	23
		0.6	19
		0.6	30
		0.6	29
		0.6	24
		0.6	23
		0.6	30
		0.6	29
		0.6	32
		0.6	26
		0.6	24
		0.6	32
		0.6	34
		0.6	28
		0.6	26
		0.6	24
		0.6	29
		0.6	24
		0.6	27
		0.6	34
		0.6	22
		0.6	32
		0.6	24
		0.6	29
		0.6	26
		0.6	40
		0.6	24
		0.6	30
		0.6	28
		0.6	27
		0.6	28
		0.6	24
		0.6	24
		0.6	25
		0.6	24
		0.6	27
		0.6	28
		0.6	29
		0.6	29
		0.6	27
		0.6	27
		0.6	29
		0.6	25
		0.6	23
		0.6	36
		0.6	42
		0.6	28
		0.6	27
		0.6	26
		0.6	42
		0.6	29
		0.6	32
		0.6	48
		0.6	66
		0.6	41
		0.6	34
		0.6	28
		0.6	31
		0.6	28
		0.6	26
		0.6	30
		0.6	32
		0.6	29
		0.6	50
		0.6	31
		0.6	31
		0.6	31
		0.6	31
		0.6	30
		0.6	29
		0.6	31
		0.6	29
		0.6	30
		0.6	35
		0.6	30
		0.6	31
		0.6	31
		0.6	35
		0.6	30
		0.6	28
		0.6	34
		0.6	28
		0.6	30
		0.6	25
		0.6	25
		0.6	42
		0.6	30
		0.6	43
		0.6	34
		0.6	34
		0.6	30
		0.6	32
		0.6	32
		0.6	33
		0.6	29
		0.6	34
		0.6	31
		0.6	27
		0.6	32
		0.7	32
		0.7	36
		0.7	37
		0.7	37
		0.7	33
		0.7	39
		0.7	42
		0.7	36
		0.7	42
		0.7	41
		0.7	39
		0.7	38
		0.7	34
		0.7	30
		0.7	41
		0.7	38
		0.7	30
		0.7	29
		0.7	43
		0.7	35
		0.7	31
		0.7	33
		0.7	34
		0.7	33
		0.7	35
		0.7	33
		0.7	41
		0.7	42
		0.7	37
		0.7	34
		0.7	52
		0.7	39
		0.7	40
		0.7	44
		0.7	39
		0.7	49
		0.7	38
		0.7	47
		0.7	40
		0.7	37
		0.7	48
		0.7	35
		0.7	41
		0.7	41
		0.7	44
		0.7	49
		0.7	46
		0.7	46
		0.7	45
		0.7	41
		0.7	45
		0.7	38
		0.7	39
		0.7	37
		0.7	36
		0.7	38
		0.7	45
		0.7	36
		0.7	36
		0.7	42
		0.7	44
		0.7	40
		0.7	41
		0.7	43
		0.7	44
		0.7	44
		0.7	40
		0.7	56
		0.7	38
		0.7	45
		0.7	42
		0.7	43
		0.7	39
		0.7	40
		0.7	49
		0.7	45
		0.7	38
		0.7	41
		0.7	39
		0.7	43
		0.7	35
		0.7	44
		0.7	44
		0.7	42
		0.7	39
		0.7	46
		0.7	38
		0.7	46
		0.7	45

## Sheet: e
Compound	Average Mn Oxidation State	Manufacturer	Mn(II) oxidised or "acid-insoluble fraction" (µmol⋅ml-1)	Mn(II) or "acid-soluble fraction" (µmol⋅ml-1)	Total Mn (µmol⋅ml-1)	Mn(II) oxidised or "acid-insoluble fraction" (%)	Mn(II) or "acid-soluble fraction" (%)
MnCl2	2	Fluka #221279	0.589755	86.6668	87.2566	0.00675886	0.993241
MnSO4	2	MPBio #10034-96-5	0.421114	88.9102	89.3313	0.00471407	0.995286
MnO	2	Aldrich #377201	0.903494	71.055	71.9585	0.0125558	0.987444
MnCO3-anhydrous	2	Aldrich #377449	1.50152	84.618	86.1195	0.0174353	0.982565
MnCO3⋅ xH2O	2	Aldrich #53539	1.44199	77.1917	78.6337	0.0183381	0.981662
Mn3O4	2.7	Aldrich #277473	18.8753	85.9175	104.793	0.180121	0.819879
Mn2O3	3	Aldrich #377457	87.0934	75.5813	162.675	0.535384	0.464616
MnO2	4	Synthetized according to Lovley and Phillips 1988	170.071	1.97823	172.05	0.988502	0.011498
MnO2	4	Synthetized according to Perez-Benito et al. 1996	31.0186	0.581282	31.5998	0.981605	0.0183951
MnO2	4	Sigma #310700	72.8521	1.20288	74.055	0.983757	0.0162431
KMnO4	7	Baker #3227-01	16.0079	7.65631	23.6642	0.67646	0.32354

## Sheet: f
IMG gene ID	TPM (fragment length = 100 bp)	TPM (fragment length = 230 bp)
2778262154	3.45071	3.24213
2778262155	3.17711	3.49287
2778262156	2.28911	2.29095
2778262157	7.68943	8.79566
2778262158	8.03566	7.92302
2778262159	8.37411	8.79367
2778262160	6.86387	7.4561
2778262161	9.83456	10.7215
2778262162	10.2176	10.4708
2778262163	30.5272	33.5389
2778262164	13.7054	15.2393
2778262165	22.1137	26.1686
2778262166	21.4354	22.9243
2778262167	54.2742	59.8222
2778262168	11.3543	14.5629
2778262169	3.77885	0
2778262170	133.658	158.856
2778262171	58.5873	59.0342
2778262172	25.8927	28.3735
2778262173	17.9446	19.1788
2778262174	18.4714	20.173
2778262175	29.83	33.0785
2778262176	8.05899	8.75353
2778262177	7.68943	8.45297
2778262178	5.78607	5.81683
2778262179	10.9663	13.3782
2778262180	11.388	14.0404
2778262181	6.18305	6.56058
2778262182	12.3424	12.9763
2778262183	17.038	17.5335
2778262184	11.0579	12.6281
2778262185	7.91096	8.07091
2778262186	4.04362	3.83832
2778262187	10.9894	11.2305
2778262188	6.98658	6.96552
2778262189	7.82149	6.88073
2778262190	3.98702	4.27416
2778262191	2.76865	2.70839
2778262192	4.0469	4.22277
2778262193	3.0024	3.12959
2778262194	2.87831	2.59813
2778262195	3.22628	3.38879
2778262196	5.99724	6.45164
2778262197	5.05908	5.47754
2778262198	3.53387	3.96131
2778262199	3.96669	4.01927
2778262200	3.33209	3.42688
2778262201	14.7376	14.6639
2778262202	29.7742	32.609
2778262203	3.83314	4.25378
2778262204	6.0316	6.38478
2778262205	12.4899	12.6608
2778262206	21.2018	19.4001
2778262207	16.3456	18.0761
2778262208	17.8493	20.4102
2778262209	39.0945	39.6391
2778262210	36.2962	33.507
2778262211	21.5707	23.07
2778262212	16.1198	15.5188
2778262213	34.2289	34.3072
2778262214	34.7915	35.6819
2778262215	36.5576	40.1636
2778262216	25.8203	26.1935
2778262217	29.7186	17.1462
2778262218	26.2341	15.9096
2778262219	33.4569	37.606
2778262220	15.2095	14.3921
2778262221	14.7786	16.6742
2778262222	17.4386	15.3335
2778262223	12.759	13.8074
2778262224	6.04494	6.51734
2778262225	4.82413	4.94983
2778262226	11.5691	12.5069
2778262227	9.99931	11.4039
2778262228	6.07313	6.11176
2778262229	4.64175	4.88817
2778262230	21.1887	20.7897
2778262231	35.6868	36.8199
2778262232	30.8742	31.8477
2778262233	35.0484	38.5619
2778262234	7.47206	8.58824
2778262235	13.0226	12.8086
2778262236	18.7795	21.3706
2778262237	15.9167	17.5444
2778262238	10.9008	11.8444
2778262239	7.41094	7.81504
2778262241	220.646	0
2778262242	195.926	207.279
2778262243	67.3899	72.2842
2778262244	107.339	114.879
2778262246	38.7468	41.1233
2778262247	82.2654	0
2778262248	67.5902	71.0399
2778262249	7.32746	7.64898
2778262250	8.69686	9.12976
2778262251	16.4916	19.6421
2778262252	10.2474	11.4339
2778262253	24.2211	25.7629
2778262254	1.39068	0.961537
2778262255	2.08427	2.1499
2778262256	6.29644	4.34137
2778262257	5.63709	5.74984
2778262258	4.63062	5.47685
2778262259	3.67999	3.9084
2778262260	7.07853	7.65726
2778262261	6.47701	6.931
2778262262	7.96845	8.49557
2778262263	7.9693	10.9436
2778262264	2.72964	2.87368
2778262265	3.63385	3.99131
2778262266	4.87374	4.90378
2778262267	4.51115	4.63932
2778262268	3.19283	3.2149
2778262269	2.76865	3.06475
2778262270	1.52578	1.30882
2778262271	1.15594	1.21556
2778262272	1.14473	1.13525
2778262273	0.901307	0.901572
2778262274	5.74771	6.53081
2778262275	7.83972	8.49864
2778262276	3.89561	3.60639
2778262277	3.99324	3.99835
2778262278	4.22906	4.85032
2778262279	4.05525	4.31716
2778262280	1.17367	1.30882
2778262281	1.43844	1.6394
2778262282	0.830444	0.980553
2778262283	0.738423	0.859105
2778262284	0.798285	0.934739
2778262285	0.74379	0.88994
2778262286	0.179994	0.243934
2778262287	2.38366	2.64952
2778262288	22.2672	22.3287
2778262289	25.7146	27.9055
2778262290	8.0088	8.45064
2778262291	3.08874	3.39011
2778262292	2.46324	2.56977
2778262293	4.83445	5.24562
2778262294	3.65547	3.86269
2778262295	4.81267	5.29139
2778262296	13.2296	14.3921
2778262297	26.1579	27.7629
2778262298	9.98846	10.7685
2778262299	9.06681	9.71274
2778262300	15.261	16.2914
2778262301	6.53494	6.84587
2778262302	6.68481	6.95684
2778262303	8.09677	8.83418
2778262304	6.30873	5.37363
2778262305	12.4688	13.3929
2778262306	20.4325	21.8446
2778262307	14.1725	14.3616
2778262308	11.4692	13.0245
2778262309	16.4845	18.1541
2778262310	1.70915	1.62739
2778262311	2.64704	2.59771
2778262312	5.53819	6.06965
2778262313	11.4725	11.1476
2778262315	23.2723	24.2901
2778262316	17.8705	19.2447
2778262317	10.6138	10.6042
2778262318	11.3667	11.0038
2778262319	13.011	12.3543
2778262320	12.4901	12.4682
2778262321	23.8244	0
2778262322	15.3943	15.6124
2778262323	19.1055	19.741
2778262324	6.23441	6.30064
2778262325	115.181	128.939
2778262326	71.7914	77.5947
2778262327	102.886	113.275
2778262328	62.0781	62.3033
2778262329	52.344	49.9687
2778262330	41.8926	42.7547
2778262331	20.5971	22.0716
2778262332	9.73856	10.7021
2778262333	23.7914	25.4124
2778262334	22.5265	23.5878
2778262335	12.0939	12.9847
2778262336	85.4151	69.3253
2778262337	43.1582	46.7445
2778262338	20.0138	20.7928
2778262339	14.4254	16.1201
2778262340	11.4409	0
2778262341	32.9689	36.0545
2778262342	13.2802	13.8003
2778262343	11.5766	13.6921
2778262344	7.61142	8.12296
2778262345	22.1458	0
2778262346	17.9638	18.4855
2778262347	11.2505	13.3994
2778262348	8.11008	8.20425
2778262349	6.31243	7.36767
2778262350	7.08285	7.30734
2778262351	4.82353	4.62999
2778262352	5.79213	5.79203
2778262353	2.86365	3.04773
2778262354	3.20017	2.7361
2778262355	1.72257	1.84539
2778262356	4.71749	5.30406
2778262357	3.4954	3.29869
2778262358	4.59774	5.18141
2778262359	4.46519	5.04993
2778262360	8.90879	9.73986
2778262361	5.55165	6.19169
2778262362	5.03871	4.70986
2778262363	6.24357	7.2592
2778262364	9.69908	9.65988
2778262365	17.078	16.5331
2778262366	6.1686	6.82984
2778262367	8.63781	9.17582
2778262368	10.403	10.4188
2778262369	11.1198	11.4247
2778262370	34.8258	33.4776
2778262371	33.9606	0
2778262372	28.2058	31.6448
2778262373	183.508	51.4838
2778262374	138.556	171.779
2778262375	79.7578	85.0065
2778262376	104.413	47.339
2778262377	82.8906	75.8502
2778262378	121.274	127.394
2778262379	186.264	0
2778262380	213.589	203.592
2778262381	273.789	0
2778262382	71.2123	27.1943
2778262383	66.038	36.8088
2778262384	47.1869	49.4951
2778262385	72.5626	72.5761
2778262386	86.2374	0
2778262387	133.222	152.238
2778262388	38.3595	41.4832
2778262389	15.6254	16.1395
2778262390	12.0659	11.2749
2778262391	19.4404	22.2173
2778262392	5.64093	5.79863
2778262393	11.2926	12.7258
2778262394	15.5692	17.102
2778262395	12.5029	14.1139
2778262396	5.12077	5.4276
2778262397	6.05764	6.68009
2778262398	15.777	12.1363
2778262399	17.9757	19.5103
2778262400	9.09267	9.72463
2778262401	3.81363	0
2778262402	46.2182	48.565
2778262403	15.5403	16.4378
2778262404	4.99291	5.19518
2778262405	14.7076	15.3238
2778262406	18.6649	14.7318
2778262407	15.9619	15.3893
2778262408	8.33709	8.80766
2778262409	4.6407	4.61409
2778262410	2.94765	3.05371
2778262411	28.1095	29.0798
2778262412	35.8652	38.9831
2778262413	26.5824	28.1975
2778262414	15.3207	16.0044
2778262415	9.45041	10.1315
2778262416	3.92827	4.24793
2778262417	2.38378	2.62888
2778262418	2.26692	2.21401
2778262419	4.39736	6.15873
2778262420	5.61722	5.88271
2778262421	26.185	26.0942
2778262422	56.603	62.9636
2778262423	49.5011	52.4056
2778262424	49.8666	50.3887
2778262425	78.8037	0
2778262426	8.23898	8.90368
2778262427	31.756	35.9714
2778262428	35.4223	38.0148
2778262429	27.2431	19.0916
2778262430	18.0798	21.7005
2778262431	17.5662	22.9138
2778262432	7.42211	7.71767
2778262433	3.36941	3.53791
2778262434	6.46418	6.94308
2778262435	9.82573	14.6678
2778262436	20.1477	24.6792
2778262437	11.8265	11.5655
2778262438	7.01863	8.15613
2778262439	375.709	376.516
2778262440	37.7615	34.7719
2778262441	61.8128	62.2566
2778262442	62.4746	49.7936
2778262443	68.091	72.3238
2778262444	68.6549	69.9888
2778262445	63.9073	72.4287
2778262446	57.1258	62.4689
2778262447	72.5459	73.1831
2778262448	62.3	70.7877
2778262449	5.57007	5.54955
2778262450	10.6847	11.3379
2778262451	11.3419	12.208
2778262452	23.4658	25.8503
2778262453	29.5016	31.1241
2778262454	20.259	21.4516
2778262455	30.1064	32.7626
2778262456	38.1417	39.4333
2778262457	16.8452	17.7793
2778262458	10.4538	11.2273
2778262459	8.2012	9.33106
2778262460	4.19417	3.99012
2778262461	4.21066	4.49022
2778262462	6.85501	7.55037
2778262463	7.91805	8.5298
2778262464	18.7128	19.0273
2778262465	34.2014	37.9449
2778262466	37.469	39.6866
2778262467	5.38532	5.68656
2778262468	2.87641	3.22282
2778262469	7.99477	7.71758
2778262470	3.80431	3.51854
2778262471	2.93345	3.0161
2778262472	5.44048	6.01599
2778262473	6.17391	6.04741
2778262474	7.93608	7.92276
2778262475	6.67229	6.75476
2778262476	6.31066	6.17417
2778262477	8.19368	8.76733
2778262478	14.655	15.6688
2778262479	16.1804	16.4993
2778262480	11.7432	12.04
2778262481	29.1831	30.6654
2778262482	37.7021	40.0068
2778262483	40.9096	44.0368
2778262485	74.4865	9.71225
2778262486	28.3375	29.9764
2778262487	12.9705	7.63533
2778262488	10.3332	13.0627
2778262489	2.81991	2.939
2778262490	1.71389	1.52512
2778262491	1.52924	1.88497
2778262492	1.11526	0
2778262493	1.98891	0
2778262494	1.31488	1.6516
2778262495	0.456887	0.411788
2778262496	1.7437	0
2778262497	1.56162	1.39735
2778262498	2.07848	1.92976
2778262499	2.49127	1.69086
2778262500	5.08113	5.47674
2778262501	1.90956	1.86622
2778262502	8.49511	9.85091
2778262503	4.00915	3.8099
2778262504	590.763	0
2778262505	15.0019	15.9724
2778262506	19.6622	19.4283
2778262507	12.0964	13.0435
2778262508	19.4162	20.525
2778262509	19.2728	21.2867
2778262510	6.91905	7.29549
2778262511	5.76227	6.19176
2778262512	5.34116	6.0512
2778262513	7.53122	7.87401
2778262514	17.9734	17.134
2778262515	54.704	60.0058
2778262516	102.345	111.699
2778262517	78.9492	85.2294
2778262518	52.5033	61.6043
2778262519	28.4691	29.6582
2778262520	17.2961	17.9843
2778262521	11.204	12.0805
2778262522	10.6061	11.8929
2778262523	6.66824	7.49801
2778262524	5.95774	7.38319
2778262525	8.37993	7.89994
2778262526	6.00614	5.01015
2778262527	35.9711	38.6118
2778262528	20.2297	21.3527
2778262529	15.9619	16.6043
2778262530	7.62319	8.09473
2778262531	9.87898	10.6425
2778262532	8.76124	9.44545
2778262533	14.6258	6.9316
2778262534	7.34886	8.05301
2778262535	8.79729	8.89934
2778262536	32.903	39.3945
2778262537	2.64816	2.72194
2778262538	7.52025	7.81939
2778262539	17.0182	18.9782
2778262540	47.0759	54.7285
2778262541	1.32202	1.44361
2778262542	0.767541	0.889396
2778262543	3.62147	3.62061
2778262544	3.49072	3.59153
2778262545	2.61349	3.01737
2778262546	4.63442	4.84093
2778262547	4.76843	5.32773
2778262548	8.05337	8.43073
2778262549	16.6625	18.4989
2778262550	22.2578	22.1186
2778262551	12.6244	12.2497
2778262552	23.6882	24.3576
2778262553	99.7059	113.166
2778262554	84.1861	92.4236
2778262555	11.495	13.2886
2778262556	8.92628	8.5996
2778262557	21.23	26.2244
2778262558	7.21046	7.28193
2778262559	10.2075	10.4052
2778262560	8.13495	8.69776
2778262561	20.925	22.209
2778262562	7.16052	7.4025
2778262563	6.28118	6.68984
2778262564	3.52364	3.48791
2778262565	7.33937	7.73468
2778262566	7.49811	7.86462
2778262567	10.6961	12.0612
2778262568	4.34231	4.61662
2778262569	89.1327	104.773
2778262570	50.8089	52.1078
2778262571	33.6243	35.6228
2778262572	16.9187	17.8289
2778262573	7.47356	8.02146
2778262574	8.40076	8.89675
2778262575	7.8617	8.54088
2778262576	5.7876	6.26417
2778262577	10.9623	11.8658
2778262578	11.2372	11.8959
2778262579	4.59041	4.8809
2778262580	4.44913	4.61845
2778262581	6.11695	6.54949
2778262582	13.1593	14.5772
2778262583	21.7485	23.1307
2778262584	5.66193	5.98091
2778262585	15.0055	17.4822
2778262586	11.9472	13.4667
2778262587	10.326	6.59405
2778262588	26.4987	29.5147
2778262589	9.98763	10.5769
2778262590	9.85335	10.3046
2778262591	3.86602	4.24593
2778262592	5.49191	6.21597
2778262593	9.38183	11.7339
2778262594	4.01562	4.05883
2778262595	9.40771	10.0191
2778262596	20.2255	21.4899
2778262597	12.3904	12.4969
2778262598	6.35693	6.56076
2778262599	71.6386	78.0185
2778262600	83.7382	98.1712
2778262601	50.1016	54.7373
2778262602	8.44025	8.67832
2778262603	6.2367	5.98825
2778262604	5.85275	6.27777
2778262605	4.40424	4.65183
2778262606	8.47491	10.3982
2778262607	0.98874	0.904189
2778262608	3.66807	3.90109
2778262609	4.48952	4.54816
2778262610	7.0745	7.61463
2778262611	5.53529	5.73855
2778262612	3.83929	3.8318
2778262613	4.04404	4.53019
2778262614	2.44203	2.47882
2778262615	6.08294	6.73259
2778262616	15.3951	17.3355
2778262617	3.77967	4.41943
2778262618	4.97082	5.50392
2778262619	14.8854	0
2778262620	21.8315	22.9649
2778262621	12.1553	0
2778262622	7.03389	7.98512
2778262623	5.55348	5.94828
2778262624	4.85434	5.34546
2778262625	2.47417	2.27667
2778262626	3.53725	3.44471
2778262627	7.21044	6.16502
2778262628	26.7067	26.6424
2778262629	23.3052	24.2549
2778262631	26.8316	26.7216
2778262632	42.2372	46.5661
2778262633	36.4976	39.1553
2778262634	29.1295	29.0852
2778262635	9.86818	9.50316
2778262636	5.48285	6.048
2778262637	6.56626	6.99136
2778262638	4.71268	4.7529
2778262639	4.89941	5.12425
2778262640	9.96581	9.71928
2778262641	11.2169	13.2984
2778262642	12.2886	14.9191
2778262643	10.7342	12.3642
2778262644	6.41388	6.56777
2778262645	6.97499	7.16673
2778262646	8.78516	9.21355
2778262647	8.87222	8.9133
2778262648	4.56027	4.73363
2778262649	5.52066	5.18196
2778262650	5.87481	7.02439
2778262651	4.85453	4.81649
2778262652	1.97883	1.94001
2778262653	1.99308	2.10154
2778262654	1.29501	1.38789
2778262655	0.551147	0.653607
2778262656	6.32357	6.74627
2778262657	10.6939	11.0123
2778262658	12.6442	12.8008
2778262659	9.06405	9.81207
2778262660	3.68814	4.03973
2778262661	3.92837	4.10365
2778262662	8.64202	5.6039
2778262663	7.08771	8.27957
2778262664	7.44396	7.9174
2778262665	3.33902	3.46214
2778262666	5.03928	5.13009
2778262667	6.95442	7.26164
2778262668	2.96419	3.04834
2778262669	3.31571	3.28161
2778262670	6.45757	6.59437
2778262671	6.9321	7.53427
2778262672	16.4042	18.5078
2778262673	15.3794	18.4813
2778262674	51.9283	55.5506
2778262675	23.4216	30.4265
2778262676	44.9258	55.2996
2778262677	7.3951	7.69111
2778262678	13.7527	15.1264
2778262679	23.4131	0
2778262680	8.92329	8.79617
2778262681	18.4198	22.3123
2778262682	9.38412	10.278
2778262683	5.09616	5.57586
2778262684	11.0953	12.9407
2778262685	6.70274	6.92992
2778262686	20.4477	0
2778262687	16.2941	17.5392
2778262688	16.9209	17.9265
2778262689	15.091	15.4245
2778262690	9.39954	9.81287
2778262691	10.2441	11.4927
2778262692	6.92413	7.63991
2778262693	5.57684	6.10295
2778262694	4.2802	4.3567
2778262695	5.09131	5.72829
2778262696	5.13366	5.68721
2778262697	7.71137	7.70285
2778262698	9.19762	9.79973
2778262699	10.6971	11.3788
2778262700	11.391	11.6915
2778262701	6.94053	7.33607
2778262702	5.8193	6.27972
2778262703	4.09084	3.6869
2778262704	2.1992	2.16903
2778262705	3.46081	3.70621
2778262706	5.77494	6.30912
2778262707	4.77256	4.96024
2778262708	3.09462	3.76922
2778262709	5.29887	5.41313
2778262710	4.27305	4.45374
2778262711	2.41443	2.55526
2778262712	4.93656	6.12272
2778262713	2.64219	2.85482
2778262714	5.17733	5.8516
2778262717	13.7727	14.7702
2778262718	40.166	42.5743
2778262719	99.3396	106.391
2778262720	14.0075	12.0558
2778262721	15.5533	16.3929
2778262722	13.9456	15.724
2778262723	6.30616	6.29605
2778262724	1.66219	1.56495
2778262725	3.08227	2.90368
2778262726	4.1459	4.18155
2778262727	5.81571	6.57914
2778262728	5.85539	6.76144
2778262729	17.5526	20.8407
2778262730	14.9849	15.986
2778262731	11.4694	10.2761
2778262732	6.60385	6.84124
2778262733	13.0102	13.8791
2778262734	16.081	15.4929
2778262735	15.0202	15.4342
2778262736	10.2719	10.7364
2778262737	6.30669	6.70903
2778262738	4.05321	4.57141
2778262739	3.79957	3.64512
2778262740	2.93681	3.35331
2778262741	44.9681	53.5092
2778262742	33.8235	26.5531
2778262743	19.4765	20.0126
2778262744	17.4924	19.638
2778262745	25.0581	26.5837
2778262746	55.0713	68.3021
2778262747	47.6872	47.2736
2778262748	41.2422	44.6634
2778262749	46.0878	47.3307
2778262750	35.8218	41.607
2778262751	53.854	58.6086
2778262753	6.93337	7.56121
2778262754	6.26399	6.92434
2778262755	4.50877	4.56404
2778262756	23.7743	25.5844
2778262757	27.733	31.0783
2778262758	40.0074	43.4899
2778262759	158.108	174.486
2778262760	192.954	201.456
2778262761	328.596	0
2778262762	190.644	218.236
2778262763	3.48915	3.64409
2778262764	5.17483	5.03887
2778262765	6.58313	6.51377
2778262766	4.57206	4.46841
2778262767	5.51881	5.94198
2778262768	8.67541	9.02051
2778262769	30.883	32.5707
2778262770	35.928	36.9412
2778262771	5.05179	5.80563
2778262772	4.42982	4.88282
2778262773	8.98824	9.68049
2778262774	154.638	0
2778262775	106.043	0
2778262776	85.7009	0
2778262777	39.2765	40.5177
2778262778	18.4218	19.9255
2778262779	2.93167	2.98168
2778262780	1.71243	1.76042
2778262781	1.11385	1.21538
2778262782	2.13325	2.47359
2778262783	6.44134	6.82591
2778262784	7.22097	7.51009
2778262785	16.3632	18.383
2778262786	18.6386	19.4691
2778262787	13.0355	12.3437
2778262788	9.59034	9.74758
2778262789	7.0138	0
2778262790	5.65298	5.40974
2778262791	2.79432	2.96927
2778262792	5.00301	5.46395
2778262793	2.64483	2.5968
2778262794	2.9699	2.56131
2778262795	0.994436	1.0906
2778262796	2.14887	2.08342
2778262797	2.44213	2.78209
2778262798	3.28237	3.27308
2778262799	31.0861	30.9239
2778262800	50.4008	53.2708
2778262801	14.2197	15.0807
2778262802	21.4446	23.1704
2778262803	15.7715	16.608
2778262804	41.1322	15.2622
2778262805	35.8356	38.1307
2778262806	18.2803	17.8409
2778262807	18.7608	21.3992
2778262808	12.3305	12.5711
2778262809	8.78243	9.77475
2778262810	1.00438	0.958194
2778262811	3.8064	3.96075
2778262812	7.99106	9.40385
2778262813	6.20591	6.55128
2778262814	2.35167	1.16505
2778262815	1.47751	1.0721
2778262816	2.50728	0
2778262817	0.729492	0.809473
2778262818	1.9201	1.91527
2778262819	1.61135	1.93834
2778262820	0.651357	0.619764
2778262821	0.779249	0.849689
2778262822	1.19159	1.2386
2778262823	2.49624	2.69461
2778262824	8.25673	8.87243
2778262825	14.8222	16.4674
2778262826	14.3955	14.5384
2778262827	37.716	41.5893
2778262828	84.987	92.2389
2778262829	19.5777	21.0725
2778262830	17.5886	18.6839
2778262831	4.38619	4.98577
2778262832	23.09	24.6128
2778262833	26.3435	28.7648
2778262834	29.6309	31.3488
2778262835	14.7184	13.2692
2778262836	41.2651	45.6794
2778262837	18.4709	18.3959
2778262838	12.79	13.1943
2778262839	26.3186	34.1039
2778262840	17.5637	17.9113
2778262841	23.3899	20.9502
2778262842	9.49598	9.96504
2778262843	8.37796	8.54727
2778262844	4.30796	4.62948
2778262845	2.25529	2.31367
2778262846	1.1106	1.12358
2778262847	7.41683	9.01526
2778262848	9.62197	4.76238
2778262849	4.82173	5.20453
2778262850	5.42756	4.52018
2778262851	5.19668	5.38769
2778262852	17.4838	15.5455
2778262853	12.9911	15.1713
2778262854	10.3502	10.8096
2778262855	8.4894	8.70243
2778262856	21.1301	22.9089
2778262857	23.294	24.5383
2778262858	5.36242	4.92583
2778262859	6.526	7.09956
2778262860	4.93044	5.22143
2778262861	14.6787	16.3023
2778262862	17.927	18.3379
2778262863	15.7543	16.6705
2778262864	10.9168	11.8215
2778262865	12.2389	12.963
2778262866	16.8359	17.5616
2778262867	36.3096	39.1144
2778262868	52.5687	59.3465
2778262869	6.64409	6.84692
2778262870	14.7483	16.0752
2778262871	4.88426	5.33234
2778262872	3.68982	3.90932
2778262873	9.06505	8.12908
2778262874	23.7925	25.071
2778262875	623.602	733.096
2778262876	114.401	125.916
2778262877	64.4036	70.9896
2778262878	29.7472	30.975
2778262879	19.2462	19.174
2778262880	18.6217	18.6639
2778262881	18.1248	18.9642
2778262882	13.7895	14.8773
2778262884	21.6864	22.768
2778262885	88.7549	91.241
2778262886	45.4706	48.5558
2778262887	56.64	67.7971
2778262888	59.8224	64.3377
2778262889	237.749	227.577
2778262890	39.8338	41.4329
2778262891	9.78064	0
2778262892	8.24927	8.97247
2778262893	5.64375	5.60518
2778262894	6.06572	7.94678
2778262895	3.84966	4.11311
2778262896	3.24198	3.40121
2778262897	4.24002	4.48417
2778262898	8.07879	7.84391
2778262899	7.76867	8.58979
2778262900	8.16439	11.8414
2778262901	8.42477	8.65126
2778262902	11.2512	13.2962
2778262903	10.5051	10.8629
2778262904	15.4805	15.0171
2778262905	40.7233	43.5392
2778262906	5.30983	5.97639
2778262907	19.1712	21.3914
2778262908	22.8556	23.2527
2778262909	14.4676	14.3794
2778262910	32.3517	34.1856
2778262911	98.2727	104.041
2778262912	7.77598	7.84443
2778262913	6.04188	6.94184
2778262914	6.86864	6.98061
2778262915	11.8148	12.1229
2778262916	22.4561	23.168
2778262917	23.986	22.4147
2778262918	24.7715	27.1173
2778262919	22.1823	23.7153
2778262920	28.6967	31.2338
2778262921	23.4455	24.5407
2778262922	34.0857	35.729
2778262923	65.9198	66.9047
2778262924	67.283	67.1017
2778262925	55.2007	60.9203
2778262926	124.473	134.093
2778262927	157.171	162.294
2778262928	12.4262	13.2803
2778262929	11.0296	11.6206
2778262930	15.9147	17.1888
2778262931	16.3713	17.5392
2778262932	1.86236	1.92958
2778262933	4.39736	4.17205
2778262934	7.28191	0
2778262935	8.89083	9.48891
2778262936	17.6449	19.1805
2778262938	9.49935	10.961
2778262939	12.6844	12.8152
2778262940	28.8338	28.8346
2778262941	25.476	29.4031
2778262942	16.1187	18.7514
2778262943	25.0943	26.2677
2778262944	49.2308	51.6649
2778262945	132.401	138.08
2778262946	93.6301	103.226
2778262947	111.148	121.389
2778262948	277.613	266.855
2778262949	5.94014	6.51468
2778262950	18.7501	19.6954
2778262951	135.041	141.208
2778262952	176.839	193.061
2778262953	111.669	119.913
2778262954	47.8593	49.8436
2778262955	30.4192	31.7316
2778262956	29.2001	30.5598
2778262957	32.8301	42.1199
2778262958	10.0716	10.5072
2778262959	6.1505	6.37984
2778262960	14.5622	14.952
2778262961	18.9778	19.2495
2778262962	23.791	24.9258
2778262963	6.0577	7.16897
2778262964	11.9619	13.377
2778262965	3.1118	3.03715
2778262966	4.23348	4.51702
2778262967	1.43504	1.44784
2778262968	1.72883	1.69084
2778262969	0.711412	0.780639
2778262970	1.29371	1.04253
2778262971	0.67968	0.760896
2778262972	0.355466	0.357615
2778262973	0.384356	0.300717
2778262974	0.884529	1.44656
2778262975	1.25194	1.40892
2778262976	1.70256	1.81979
2778262977	4.47323	4.94832
2778262978	3.67057	3.61663
2778262979	5.34121	5.51287
2778262980	6.82679	0
2778262981	2.59918	2.60843
2778262982	1.3707	1.39988
2778262983	2.63095	2.76475
2778262984	6.13021	0
2778262985	4.10894	3.91141
2778262986	5.23486	5.49391
2778262987	6.19664	5.984
2778262988	3.98355	4.03434
2778262989	5.88609	6.41956
2778262990	16.7071	18.2504
2778262991	33.9351	40.2632
2778262992	23.6794	25.794
2778262993	13.7795	15.3057
2778262994	11.375	11.1318
2778262995	12.7211	11.6401
2778262996	18.8069	19.817
2778262997	13.595	14.2604
2778262998	16.902	18.1846
2778262999	29.483	34.4782
2778263000	26.4978	30.8924
2778263001	3.9748	4.47943
2778263002	4.02741	4.37232
2778263003	3.47582	3.85422
2778263004	7.17681	8.33874
2778263005	6.33819	6.53607
2778263006	2.64052	2.83022
2778263007	4.43557	5.08692
2778263008	8.00346	8.35276
2778263009	11.5058	12.4148
2778263010	10.0391	10.5278
2778263012	16.6568	18.3254
2778263013	14.0529	18.4062
2778263014	19.9301	21.1531
2778263015	43.1536	44.8788
2778263016	238.383	287.673
2778263017	253.803	0
2778263019	102.353	113.317
2778263020	27.4064	24.9993
2778263021	17.8477	19.8952
2778263022	2.36913	2.57652
2778263023	59.6482	69.2994
2778263024	11.0279	11.7733
2778263025	3.17863	3.71311
2778263026	3.48465	3.5921
2778263027	3.64769	3.64009
2778263028	10.7764	11.302
2778263029	22.928	24.3201
2778263030	32.0138	36.8203
2778263031	5.47258	6.05224
2778263032	3.67383	4.10757
2778263033	6.37671	6.33852
2778263034	7.56971	7.70528
2778263035	8.75805	9.29809
2778263036	21.8905	26.8523
2778263037	20.5708	17.5358
2778263038	19.7479	26.6091
2778263039	6.39766	5.69967
2778263040	2.50728	0
2778263041	3.60822	3.75473
2778263042	12.8468	13.3093
2778263043	19.1787	19.9299
2778263044	187.412	0
2778263045	169.554	0
2778263046	182.415	197.977
2778263047	145.45	164.195
2778263048	44.7158	47.1883
2778263049	35.5662	0
2778263050	54.4462	57.8811
2778263051	42.5127	45.9789
2778263052	33.0898	39.4879
2778263053	38.6641	37.9978
2778263054	14.9826	15.3243
2778263055	50.7901	57.7407
2778263056	40.843	42.1212
2778263057	25.0138	17.861
2778263058	38.8722	41.4268
2778263059	7.63349	8.6815
2778263060	10.041	10.976
2778263061	12.0992	12.8465
2778263062	17.2553	18.7294
2778263063	46.2158	56.9083
2778263064	52.4968	57.2996
2778263065	22.3861	22.68
2778263066	41.1815	35.886
2778263067	16.3456	18.0682
2778263068	17.9754	18.9311
2778263069	142.409	164.667
2778263070	194.291	217.779
2778263071	198.879	189.499
2778263072	254.514	318.163
2778263073	6.56559	5.92354
2778263074	7.54099	7.4644
2778263075	20.2962	24.0295
2778263076	50.3443	53.8789
2778263077	32.6245	20.6825
2778263078	20.2948	18.8424
2778263079	8.62349	9.71789
2778263080	6.05079	6.40964
2778263081	10.0921	10.5191
2778263082	3.4665	3.80731
2778263083	12.8105	15.8076
2778263084	6.89398	7.32974
2778263085	35.549	37.2556
2778263086	382.192	310.662
2778263087	163.388	171.987
2778263088	68.6365	71.8447
2778263089	30.7361	32.1931
2778263090	15.2922	15.6672
2778263091	48.7516	54.1614
2778263092	19.1451	20.3706
2778263093	7.90325	7.88142
2778263094	8.19011	9.16908
2778263095	5.84802	6.30054
2778263097	9.38151	10.0608
2778263098	39.0234	39.7135
2778263099	21.9419	23.5121
2778263101	13.8369	15.0707
2778263102	6.0642	6.61906
2778263103	4.9746	4.84367
2778263104	6.19241	6.48684
2778263105	5.53324	5.59545
2778263106	3.78767	4.16489
2778263107	2.91147	2.84671
2778263108	3.46116	3.58894
2778263109	5.98067	7.08222
2778263110	81.3716	91.6636
2778263111	26.214	28.8278
2778263112	19.8985	21.4708
2778263113	9.86176	10.38
2778263114	8.76019	9.33239
2778263115	8.36322	8.6242
2778263116	7.64533	8.16412
2778263117	48.8138	32.2376
2778263118	32.4096	31.9491
2778263119	20.8716	20.8021
2778263120	1682.29	1842.78
2778263121	127.712	135.824
2778263122	33.2011	35.9853
2778263123	12.6177	12.8703
2778263124	3.39252	3.39547
2778263125	5.44055	5.36674
2778263126	6.94516	6.66692
2778263127	3.6878	4.05896
2778263128	59.1003	64.0614
2778263129	14.4731	16.0366
2778263130	5.37501	5.50485
2778263131	2.73726	3.01561
2778263132	1.88636	2.02979
2778263133	3.44418	3.48758
2778263134	1.89586	2.07044
2778263135	6.25469	6.79514
2778263136	5.54064	6.19176
2778263137	3.70281	3.85897
2778263138	4.78219	5.30011
2778263139	3.98242	3.10036
2778263140	2.79644	2.95394
2778263141	3.32594	3.47488
2778263142	5.66834	6.21179
2778263143	1.86396	2.1837
2778263144	2.17704	2.33497
2778263145	1.25862	1.64974
2778263146	1.0861	1.21641
2778263147	1.17777	0.876088
2778263148	2.51924	2.93624
2778263149	2.42707	2.80418
2778263150	5.3462	5.86685
2778263151	7.87526	8.3061
2778263152	11.5092	12.0001
2778263153	32.1284	34.8285
2778263154	34.4257	36.7708
2778263155	44.562	47.3714
2778263156	40.6359	42.2147
2778263157	101.048	105.883
2778263158	78.3021	83.9962
2778263159	2.75542	3.0069
2778263160	8.23301	8.69869
2778263161	8.14708	8.63806
2778263162	3.31494	3.56808
2778263163	3.08804	3.00848
2778263164	3.8909	4.36495
2778263165	6.61984	6.92459
2778263166	4.79697	5.14202
2778263167	2.15096	2.09592
2778263168	3.52701	3.27131
2778263169	7.59201	7.02019
2778263170	7.92959	10.4303
2778263171	11.8307	12.8519
2778263172	13.8414	10.5227
2778263173	9.71836	9.96839
2778263174	4.23736	4.58696
2778263175	9.58491	10.7495
2778263176	12.2281	12.7661
2778263177	9.47901	9.96266
2778263178	16.0464	15.3475
2778263179	5.52891	5.84215
2778263180	2.66261	2.76197
2778263181	6.37174	6.60001
2778263182	7.80053	7.91689
2778263183	6.84318	7.37893
2778263184	13.2147	14.5808
2778263185	16.0137	17.2909
2778263186	3.36966	3.59458
2778263187	7.89164	7.70441
2778263188	9.11011	9.46379
2778263189	4.05425	4.05976
2778263190	4.85149	4.8749
2778263191	3.01458	3.16186
2778263192	4.02458	3.87485
2778263193	6.2639	6.66392
2778263194	4.70144	4.80391
2778263195	4.68903	4.79432
2778263196	5.01397	5.34845
2778263197	7.53548	0
2778263198	8.45286	0
2778263199	6.72263	6.66207
2778263200	5.7327	5.90237
2778263201	6.59471	6.46176
2778263202	5.94322	5.85937
2778263203	3.81212	3.7898
2778263204	6.37476	6.86181
2778263205	2.61503	0
2778263206	5.72297	5.85119
2778263207	23.5013	24.5716
2778263208	23.0318	24.9245
2778263209	27.5279	29.5777
2778263210	87.4866	91.7306
2778263211	159.815	172.1
2778263212	296.13	330.752
2778263213	452.147	514.589
2778263214	5.70169	5.94402
2778263215	6.66099	7.51036
2778263216	18.8793	19.8027
2778263217	9.50374	0
2778263218	11.2933	11.5956
2778263219	6.5702	3.72118
2778263220	11.6346	12.4944
2778263221	13.3261	10.4855
2778263222	14.0059	14.822
2778263223	10.9275	11.5299
2778263224	12.3215	13.1581
2778263225	10.5636	11.026
2778263226	10.084	10.4784
2778263227	15.1105	16.0654
2778263228	6.29425	6.80287
2778263229	13.7318	0
2778263230	13.8912	13.7236
2778263231	8.07523	8.83789
2778263232	4.70256	5.26696
2778263233	8.45045	9.45262
2778263234	15.2106	17.1669
2778263235	42.8259	46.3865
2778263236	8.90796	9.77461
2778263237	29.1776	29.7874
2778263238	10.4141	10.2422
2778263239	599.642	0
2778263240	169.852	147.352
2778263241	57.7498	60.1637
2778263242	28.141	30.0782
2778263243	24.6179	26.4251
2778263244	15.6869	15.9677
2778263245	10.6095	10.9557
2778263246	9.43967	10.1839
2778263247	12.9138	13.6146
2778263248	8.59135	7.79806
2778263249	5.93689	6.33803
2778263250	34.5073	37.7572
2778263251	32.6621	34.2746
2778263252	10.182	10.6638
2778263253	9.60064	10.4006
2778263254	7.54139	8.04629
2778263255	7.61271	8.0379
2778263256	8.10851	0
2778263257	4.98662	5.29482
2778263258	1.3601	1.67705
2778263259	4.17466	4.44304
2778263260	4.58852	4.58645
2778263261	4.5312	4.26695
2778263262	10.1906	8.15536
2778263263	11.4635	12.0175
2778263264	6.79248	7.62528
2778263265	1.7019	1.86807
2778263266	3.49728	3.56985
2778263267	3.35911	3.64206
2778263268	3.27971	3.75532
2778263269	1.93656	2.18137
2778263270	1.19548	1.25364
2778263271	1.27045	1.32387
2778263272	7.97863	11.9807
2778263273	8.72095	8.8733
2778263274	7.17563	8.24367
2778263275	32.1433	36.5842
2778263276	20.4581	20.9114
2778263277	8.85129	8.91666
2778263278	10.8667	12.13
2778263279	7.97569	7.96373
2778263280	9.19335	1.98046
2778263281	14.9271	10.2738
2778263282	7.94885	8.33991
2778263283	10.7911	9.81141
2778263284	2.67874	3.06149
2778263285	4.13056	4.09967
2778263286	3.97149	4.29916
2778263287	4.82713	5.25487
2778263288	6.8462	8.38137
2778263289	5.19232	5.70862
2778263290	6.70222	6.75478
2778263291	6.43451	7.07157
2778263292	15.2103	16.4322
2778263293	17.0508	17.8335
2778263294	18.1477	19.3381
2778263295	24.3214	25.1404
2778263296	41.758	48.3462
2778263297	62.8683	65.2271
2778263298	71.8172	82.4655
2778263300	36.6698	39.1604
2778263301	56.0596	61.852
2778263302	83.0064	87.8885
2778263303	93.7321	100.116
2778263304	116.086	103.077
2778263305	6.53524	7.23426
2778263306	6.83124	6.96717
2778263307	24.1454	23.8304
2778263308	12.6603	12.9659
2778263309	4.4741	4.85085
2778263310	23.8763	24.6014
2778263311	53.5237	58.0069
2778263312	39.1594	42.1692
2778263313	57.6582	61.1252
2778263314	74.6083	76.2891
2778263315	33.5095	34.8679
2778263316	10.7571	10.7086
2778263317	31.671	33.0788
2778263318	10.9466	10.923
2778263319	125.613	3.2063
2778263320	51.6153	54.4869
2778263321	28.2295	29.1758
2778263322	24.9578	25.3277
2778263323	26.1704	29.8071
2778263324	25.6716	27.4604
2778263325	9.5604	10.8059
2778263326	10.6769	7.60887
2778263327	67.9142	67.9507
2778263328	75.4197	79.9482
2778263329	26.4505	27.5881
2778263330	10.7083	11.2745
2778263331	8.89197	8.8324
2778263332	3.74516	3.73568
2778263333	10.1788	11.9951
2778263334	9.83355	10.2435
2778263335	74.823	2.09751
2778263336	48.9477	52.7347
2778263337	17.7487	18.1332
2778263338	14.6104	15.5412
2778263339	17.7797	18.6333
2778263340	36.1361	29.7694
2778263341	41.77	37.0495
2778263342	29.6672	30.6051
2778263343	23.2324	25.2574
2778263344	51.2019	49.1968
2778263345	21.1954	21.934
2778263346	67.7273	84.518
2778263347	7.65532	7.79178
2778263348	2.54563	2.38404
2778263349	2.20121	2.13596
2778263350	3.48763	3.38917
2778263351	0	0
2778263352	1.2278	0
2778263353	4.96043	5.14013
2778263354	12.9598	14.1743
2778263355	29.6284	31.2579
2778263356	56.2766	65.9102
2778263357	36.9178	38.4575
2778263358	55.5921	56.6012
2778263359	94.8508	102.447
2778263360	7.32739	7.8307
2778263361	2.48445	2.14138
2778263362	8.34095	8.97155
2778263363	11.2157	11.5483
2778263364	75.5892	90.6922
2778263365	56.5938	59.1759
2778263366	48.7296	51.1664
2778263367	75.3721	40.9564
2778263368	35.4856	40.4441
2778263369	30.7398	33.3311
2778263370	36.0221	40.4894
2778263371	18.1015	19.2889
2778263372	24.2526	26.0395
2778263373	18.1206	18.3908
2778263374	6.80254	5.89507
2778263375	4.26975	4.5659
2778263376	3.89613	4.34218
2778263377	3.15172	3.50836
2778263378	1.86653	1.90061
2778263379	2.32097	2.2911
2778263380	1.52246	2.03037
2778263381	1.30874	1.33309
2778263382	1.27465	1.27623
2778263383	1.19355	1.26402
2778263384	1.32072	1.41956
2778263385	1.40038	1.56286
2778263386	3.28551	2.7885
2778263387	1.66479	1.69084
2778263388	2.1713	2.3268
2778263389	3.20307	1.69086
2778263390	6.38391	6.97106
2778263391	5.17976	1.76013
2778263392	13.2219	10.0471
2778263393	12.8631	13.9428
2778263394	11.6612	11.9654
2778263395	12.0463	10.5053
2778263396	14.0809	10.2574
2778263397	4.4928	5.06598
2778263398	11.3932	14.0365
2778263399	5.83526	5.99004
2778263400	2.89952	3.2906
2778263401	4.22356	4.05033
2778263402	9.92641	10.7284
2778263403	16.2872	17.2675
2778263404	13.9768	15.4255
2778263405	7.81778	8.3061
2778263406	82.2704	89.1147
2778263407	19.6853	20.133
2778263408	7.33514	7.78779
2778263409	7.17181	7.5158
2778263410	5.06573	5.29093
2778263411	7.91329	9.5033
2778263412	13.1955	13.949
2778263413	44.5213	49.6653
2778263414	4.09283	3.7296
2778263415	5.12759	5.48231
2778263416	4.55128	4.82826
2778263417	6.39274	6.89824
2778263418	9.31839	9.66014
2778263419	4.6156	4.68434
2778263420	4.49986	4.63475
2778263421	2.86442	3.25282
2778263422	1.3975	1.59996
2778263423	1.28688	0.570508
2778263424	1.56809	1.72421
2778263425	1.69561	1.7405
2778263426	2.21448	2.27122
2778263427	1.93331	2.1499
2778263428	2.07649	2.42329
2778263429	4.90002	5.49625
2778263430	6.25001	7.16897
2778263431	5.22471	6.21769
2778263432	21.2165	21.5296
2778263433	10.451	0
2778263434	15.3559	15.7611
2778263435	27.0766	27.9538
2778263436	38.7384	39.8524
2778263437	10.8474	11.0983
2778263438	28.3	31.2985
2778263439	14.7836	0
2778263440	3.51942	3.87166
2778263441	3.67895	3.33664
2778263442	3.88609	4.16216
2778263443	4.85912	5.25471
2778263444	5.83578	6.46779
2778263445	4.74631	5.32887
2778263446	206.652	256.312
2778263447	551.344	573.207
2778263448	88.2014	30.4792
2778263449	35.5896	19.4449
2778263450	38.1277	40.9253
2778263451	21.3908	22.3776
2778263452	8.30806	9.54414
2778263453	13.0456	12.6152
2778263454	5.58208	5.89136
2778263455	14.8939	16.8932
2778263456	5.25763	5.28959
2778263457	4.45743	5.06933
2778263458	7.95648	8.00571
2778263459	6.12719	6.31382
2778263460	3.70289	3.12555
2778263461	5.62279	5.97376
2778263462	1.88552	1.55767
2778263463	69.7963	60.7368
2778263464	56.2184	56.2308
2778263465	29.1034	31.163
2778263466	24.6725	8.62614
2778263467	21.0313	21.3875
2778263468	14.9892	16.1959
2778263469	32.5827	34.7751
2778263470	142.005	174.855
2778263471	8.05499	8.45636
2778263472	19.4651	20.5444
2778263473	24.811	25.7732
2778263474	3.95287	4.25046
2778263475	24.4558	19.0495
2778263476	9.79512	10.175
2778263477	3.60788	3.73533
2778263478	2.06015	2.02724
2778263479	3.43061	3.99675
2778263480	2.86141	2.91449
2778263481	4.3717	4.56875
2778263482	5.42183	5.89242
2778263483	3.23303	3.67588
2778263484	1.6562	1.40788
2778263485	1.70673	1.82462
2778263486	2.97526	3.51879
2778263487	9.10238	0
2778263488	3.20732	0
2778263489	2.23052	0
2778263490	130.72	155.364
2778263491	87.5028	83.8288
2778263492	53.9581	63.68
2778263493	22.537	23.2928
2778263494	7.51955	8.15428
2778263495	3.22371	3.42451
2778263496	0.724879	0.63689
2778263497	0.469792	0.51261
2778263498	0.784731	0.82654
2778263499	0.388609	0.489666
2778263500	3.20468	3.50657
2778263501	5.03256	6.27066
2778263502	4.31292	5.61978
2778263503	3.68004	4.2034
2778263504	0.895149	0
2778263505	2.38283	2.67102
2778263506	2.10113	2.67906
2778263507	1.44713	1.57924
2778263508	1.36128	1.56469
2778263509	1.42499	1.35832
2778263510	1.36715	1.3215
2778263511	1.87119	1.95181
2778263512	2.12863	2.23195
2778263513	2.21323	2.43481
2778263514	3.51625	3.77642
2778263515	4.42239	4.90457
2778263516	23.7667	25.6971
2778263517	17.7033	20.1184
2778263518	11.997	12.0389
2778263519	6.26771	7.01713
2778263520	3.08407	3.08749
2778263521	2.75782	2.61152
2778263522	3.66209	4.13521
2778263523	4.66704	5.0484
2778263524	8.45864	8.33021
2778263525	21.0248	22.4045
2778263526	48.6846	51.3633
2778263527	70.8525	80.689
2778263528	34.5123	37.2358
2778263529	5.57756	5.87476
2778263530	3.69981	2.58195
2778263531	1.72805	1.59192
2778263532	1.41884	1.46433
2778263533	1.00305	1.01245
2778263534	4.59741	5.60262
2778263535	8.09195	7.89277
2778263536	10.4909	11.5167
2778263537	1.6549	1.75775
2778263538	2.46382	1.24039
2778263539	2.25822	2.50171
2778263540	3.69022	5.49246
2778263541	2.28911	2.00458
2778263542	3.38538	3.75639
2778263543	3.09322	3.22152
2778263544	4.60292	4.49329
2778263545	2.77815	2.86226
2778263546	4.19544	4.5456
2778263547	8.40453	9.15346
2778263548	15.5266	17.5445
2778263549	24.5568	30.3737
2778263550	14.0791	13.6523
2778263551	16.0109	15.9514
2778263552	19.6244	20.764
2778263553	23.7016	24.7996
2778263554	14.5494	14.8017
2778263555	5.4012	5.74737
2778263556	5.82585	6.82617
2778263557	5.41559	5.8386
2778263558	22.7549	23.8534
2778263559	14.1052	14.2959
2778263560	8.90903	7.30677
2778263561	9.5638	10.5178
2778263562	1.92804	1.92351
2778263563	0.598535	0
2778263564	4.48241	5.35812
2778263565	3.21409	2.93275
2778263566	1.7477	1.88497
2778263567	1.36343	1.39622
2778263568	2.65292	2.80354
2778263569	2.3735	2.28818
2778263570	3.49915	3.77742
2778263571	2.38552	2.49766
2778263572	3.1868	3.56596
2778263573	2.08292	2.21719
2778263574	1.52112	1.96244
2778263575	1.81569	1.95562
2778263576	5.3875	6.22022
2778263577	59.0824	49.1469
2778263578	44.5915	43.9513
2778263579	15.4874	16.4907
2778263580	5.23111	3.08699
2778263581	2.69049	2.90693
2778263582	2.45506	2.60616
2778263583	1.86188	1.82462
2778263584	2.8319	3.29949
2778263585	5.25901	5.63178
2778263586	10.0244	10.5536
2778263587	20.2884	21.2061
2778263588	2.92311	2.98845
2778263589	6.04657	6.5801
2778263590	3.74489	3.87019
2778263591	1.1053	1.11176
2778263592	0.383752	0.406173
2778263593	0.594563	0.419253
2778263594	0.174944	0
2778263595	0.605476	0.585067
2778263596	0.976305	1.0653
2778263597	0.661897	0.616388
2778263598	1.4698	1.58119
2778263599	0.698347	0.828513
2778263600	0.469276	0.450664
2778263601	1.33349	1.42798
2778263602	0.99405	1.15235
2778263603	1.29371	1.21628
2778263604	1.11184	1.11701
2778263605	2.69269	2.76192
2778263606	7.23685	7.80608
2778263607	12.8687	13.1751
2778263608	2.51029	2.92409
2778263609	4.29526	4.60089
2778263610	2.1782	1.78584
2778263611	11.1881	11.1094
2778263612	6.67146	6.60997
2778263613	9.30826	9.10813
2778263614	9.03387	9.38108
2778263615	8.48666	8.93392
2778263616	33.1274	34.7288
2778263617	89.2275	93.7799
2778263618	4.80157	4.99106
2778263619	13.2813	14.0952
2778263620	11.0994	11.1024
2778263621	1.52032	1.56414
2778263622	2.31516	2.51291
2778263623	2.85472	3.31053
2778263624	5.50394	6.03973
2778263625	6.73477	7.54732
2778263626	12.7856	13.4972
2778263627	21.8629	0
2778263628	22.4399	28.6218
2778263630	33.8172	32.9505
2778263631	15.8711	17.6595
2778263632	5.22836	5.55502
2778263633	4.51609	4.37716
2778263634	6.66824	4.85166
2778263635	3.73327	4.25046
2778263636	3.839	4.72564
2778263637	2.59001	2.57751
2778263638	3.13763	3.21685
2778263639	2.67349	2.41953
2778263640	2.49329	2.38145
2778263641	1.29944	1.39069
2778263642	1.72625	1.96686
2778263643	1.90799	1.95468
2778263644	3.42546	3.66809
2778263645	0.935083	0.976094
2778263646	0.731869	0.859318
2778263647	1.84605	1.98713
2778263648	2.28816	2.51153
2778263649	10.3094	10.1902
2778263650	8.7494	9.07882
2778263651	6.29022	6.86709
2778263652	9.36349	10.7768
2778263653	7.28764	8.10005
2778263654	4.11143	4.47969
2778263655	6.25092	6.57025
2778263656	3.72271	3.87189
2778263657	1.19973	0.915072
2778263658	2.30347	2.37972
2778263659	1.94916	1.73372
2778263660	1.37062	0.811863
2778263661	2.58553	2.51677
2778263662	2.80641	1.90495
2778263663	1.64945	1.83885
2778263664	2.04138	3.18833
2778263665	3.50329	3.03684
2778263666	3.34304	0.990229
2778263667	1.33227	1.38625
2778263668	0.635643	0.51698
2778263669	0.569469	0.627516
2778263670	1.03325	1.0767
2778263671	1.41345	0
2778263672	0.664581	0.572737
2778263673	0.650179	0.655861
2778263674	1.21774	1.35368
2778263675	4.5491	4.74678
2778263676	10.0762	11.1325
2778263677	5.45477	6.07823
2778263678	5.03773	5.17131
2778263679	10.3962	10.305
2778263680	27.3806	27.3936
2778263681	67.7646	62.4548
2778263682	71.3283	74.5403
2778263683	58.1727	65.5363
2778263684	9.46904	8.91815
2778263685	9.71705	11.1668
2778263686	2.61893	2.69572
2778263687	2.09126	2.22783
2778263688	2.32434	1.90701
2778263689	3.3286	2.69599
2778263690	2.28796	2.59343
2778263691	1.30014	1.36438
2778263692	27.7207	27.5995
2778263693	58.5173	56.4682
2778263694	33.2237	0
2778263695	13.2695	14.2232
2778263696	4.42582	4.35552
2778263697	2.58761	2.8048
2778263698	2.01629	2.20813
2778263699	3.97994	4.20513
2778263700	3.76054	4.25682
2778263701	2.72354	2.68897
2778263702	5.23539	5.24957
2778263703	1.45004	2.06419
2778263704	3.70348	4.12035
2778263705	2.31419	2.45759
2778263706	0.898551	1.0193
2778263707	0.938939	0.945262
2778263708	0.89136	1.37687
2778263709	0.588049	0.695017
2778263710	0.825721	0.582581
2778263711	0.969302	1.00364
2778263712	1.54679	1.83855
2778263713	2.4442	2.80052
2778263714	3.16111	3.94116
2778263715	5.78381	6.07638
2778263716	8.76464	9.48789
2778263717	21.4216	21.7436
2778263718	65.2425	68.3889
2778263719	118.085	122.234
2778263720	249.869	304.256
2778263721	341.712	358.573
2778263722	235.595	247.067
2778263723	101.919	127.251
2778263724	12.0894	13.2364
2778263725	10.2376	11.1615
2778263726	6.16288	6.55026
2778263727	1.98833	2.02776
2778263728	1.34491	0.841015
2778263729	0.575345	0.534394
2778263730	0.754282	0.791782
2778263731	2.48445	3.33104
2778263732	3.24813	3.28364
2778263733	2.83079	2.99085
2778263734	2.81972	2.96874
2778263735	1.08433	1.21315
2778263736	2.69535	2.35803
2778263737	6.1391	7.95753
2778263738	3.20584	3.44822
2778263739	2.21699	2.7178
2778263740	4.40222	4.88742
2778263741	11.369	12.2358
2778263742	3.3286	3.23518
2778263743	2.49733	2.65816
2778263744	5.52917	5.94857
2778263745	4.823	4.7141
2778263746	3.27136	3.39547
2778263747	1.68335	1.68842
2778263748	2.05052	1.71344
2778263749	1.0818	1.12681
2778263750	0.652695	0.576503
2778263751	2.43101	2.58749
2778263752	12.2719	12.9848
2778263753	39.9783	45.4938
2778263754	12.2145	13.3748
2778263755	7.3739	7.53337
2778263756	9.59458	10.7858
2778263757	6.8293	7.44338
2778263758	18.3837	20.542
2778263759	12.4452	12.3453
2778263760	16.9818	19.5162
2778263761	13.0619	6.0383
2778263762	27.8329	27.8873
2778263763	16.6993	18.6059
2778263764	15.1351	11.1368
2778263765	14.8254	15.3772
2778263766	58.7554	59.6472
2778263767	77.3718	0
2778263768	75.5226	79.9636
2778263769	48.2209	51.8252
2778263770	9.09834	0
2778263771	47.6667	52.433
2778263772	59.3454	69.2994
2778263773	73.5012	82.7645
2778263774	38.8844	39.8522
2778263775	12.3194	14.0899
2778263776	1.9583	1.97584
2778263777	0.583728	0.640397
2778263778	0.494686	0.545792
2778263779	0.639936	0.704268
2778263780	1.15761	0.962695
2778263781	2.03836	1.96111
2778263782	4.05222	4.28647
2778263783	18.4418	20.1591
2778263784	9.13523	9.31347
2778263785	3.79304	4.20411
2778263786	9.23998	10.1059
2778263787	30.1824	31.5779
2778263788	28.5693	30.1605
2778263789	8.4615	9.19781
2778263790	11.9229	12.3793
2778263791	3.37772	3.51543
2778263792	3.1668	3.80677
2778263793	5.87183	6.52682
2778263794	13.5336	14.4817
2778263795	22.0307	23.3043
2778263796	15.0944	7.1822
2778263797	41.0236	48.3496
2778263798	12.2436	13.4051
2778263799	4.57974	4.44492
2778263800	4.59905	4.94931
2778263801	3.51323	3.75636
2778263802	13.2082	13.3728
2778263803	18.1279	19.1291
2778263804	12.6264	13.419
2778263805	16.4273	17.7797
2778263809	27.089	29.014
2778263810	31.3772	33.7057
2778263811	31.7239	34.2689
2778263812	35.0846	38.3386
2778263814	2.59052	2.34146
2778263815	4.91971	5.12861
2778263816	8.3808	8.62505
2778263817	7.37431	7.9183
2778263818	6.97226	7.53249
2778263819	4.58095	5.19953
2778263820	2.69303	2.76883
2778263821	2.92401	2.8968
2778263822	4.84453	5.00075
2778263823	8.7124	9.01808
2778263824	7.90876	8.70438
2778263825	2.83222	3.21655
2778263826	3.35077	3.14734
2778263827	2.59935	2.72237
2778263828	6.45398	7.01677
2778263829	7.87505	7.57418
2778263830	2.63416	2.90529
2778263831	7.40362	8.18187
2778263832	15.116	16.4811
2778263833	6.53492	7.38994
2778263834	6.10303	6.35287
2778263835	12.7617	16.3863
2778263836	5.37316	5.42953
2778263837	21.1983	23.1332
2778263838	7.43352	7.76633
2778263839	362.581	0
2778263840	65.0825	65.0593
2778263841	48.1212	15.5677
2778263843	32.5618	34.959
2778263844	30.4125	32.6776
2778263845	28.1483	31.2322
2778263846	13.194	15.5509
2778263847	11.0203	12.0938
2778263848	20.7097	19.9083
2778263849	16.2065	15.5235
2778263850	24.2023	25.4641
2778263851	26.7512	25.9619
2778263852	32.0476	33.768
2778263853	29.7829	32.0603
2778263854	243.67	265.445
2778263855	105.59	112.566
2778263856	99.9408	111.907
2778263857	89.2636	99.4617
2778263858	63.9411	74.0377
2778263859	33.5526	35.8771
2778263860	21.4924	22.3077
2778263861	24.0825	25.8906
2778263862	23.6822	24.1404
2778263863	14.4706	18.9051
2778263864	7.20547	8.11258
2778263865	17.5682	19.3152
2778263866	14.6295	16.6593
2778263867	14.3866	14.1923
2778263868	10.6153	10.6304
2778263869	5.97643	5.87702
2778263870	5.02131	5.27061
2778263871	7.11404	7.33607
2778263872	5.92032	5.74582
2778263873	4.28685	4.4321
2778263874	4.6229	4.9503
2778263875	6.25508	6.6528
2778263876	9.74259	10.1553
2778263877	8.40991	8.28785
2778263878	9.60285	10.402
2778263879	3.24665	3.31265
2778263880	4.63745	5.1743
2778263881	9.53465	9.88723
2778263882	10.7042	11.4477
2778263883	10.838	11.513
2778263884	11.9092	12.5353
2778263885	8.79508	9.07565
2778263886	16.2638	16.2912
2778263888	14.6326	13.6064
2778263889	11.1151	11.9685
2778263890	5.74395	7.20142
2778263891	4.56955	4.81066
2778263892	5.92558	6.64086
2778263893	10.7099	11.3433
2778263894	15.0683	15.8224
2778263895	50.2099	53.4234
2778263896	83.6925	88.2408
2778263897	142.004	142.022
2778263898	219.565	233.064
2778263899	29.3519	33.6057
2778263900	20.3841	18.7245
2778263901	5.45163	4.94347
2778263902	11.8618	12.8141
2778263903	8.15516	8.74111
2778263904	7.74133	7.50937
2778263905	8.33003	8.9168
2778263906	16.1967	18.3235
2778263907	4.72855	4.67239
2778263908	6.77411	7.07564
2778263909	17.2774	19.0061
2778263910	16.7876	18.1072
2778263911	9.66932	10.2789
2778263912	10.2009	11.3509
2778263913	31.3802	36.4064
2778263914	51.0789	59.8369
2778263915	50.0156	61.0077
2778263916	38.9064	40.1553
2778263917	33.968	36.2016
2778263918	31.7378	0
2778263919	10.2525	11.0224
2778263920	24.8056	26.3258
2778263921	24.5132	27.9069
2778263922	3.97938	4.16717
2778263923	5.70748	6.68478
2778263924	3.85847	3.97151
2778263925	1.3504	1.23834
2778263926	1.42151	1.43598
2778263927	0.995288	1.04734
2778263928	1.22745	1.47545
2778263929	1.17053	1.23483
2778263930	1.81165	1.43164
2778263931	2.50786	2.9608
2778263932	2.75341	2.68717
2778263933	5.1663	5.83574
2778263934	6.40622	7.07214
2778263935	5.58843	6.35079
2778263936	5.25394	5.89127
2778263937	5.19213	4.96701
2778263938	2.85926	2.90681
2778263939	2.7751	3.02866
2778263940	4.06907	4.21809
2778263941	2.36678	2.59537
2778263942	3.01975	3.27272
2778263943	2.74384	3.48592
2778263944	2.35087	2.5634
2778263945	5.22593	2.91263
2778263946	3.85619	3.93797
2778263947	2.75157	2.77622
2778263948	2.52918	2.61284
2778263949	3.24068	2.88628
2778263950	5.42597	5.91768
2778263951	16.6663	18.1081
2778263952	19.521	18.413
2778263953	36.7776	41.0358
2778263954	20.9377	22.9129
2778263955	7.14524	8.15853
2778263956	6.50441	6.97788
2778263957	5.50141	5.54431
2778263958	13.6252	15.0651
2778263959	10.6766	12.4039
2778263960	10.6085	11.0287
2778263961	37.2885	42.5939
2778263963	10.9214	11.3878
2778263964	11.5876	12.859
2778263965	137.162	153.01
2778263966	19.5039	21.0686
2778263967	12.9457	13.4744
2778263968	8.68474	9.81542
2778263969	11.5355	6.42195
2778263970	162.699	173.163
2778263971	78.4994	87.8583
2778263972	66.5549	48.1905
2778263973	39.1262	40.0552
2778263974	24.7085	25.9386
2778263975	9.275	9.96306
2778263976	9.02024	11.4094
2778263977	3.85425	3.78606
2778263978	4.9392	5.36012
2778263979	1.33675	1.45172
2778263980	6.64371	7.14086
2778263981	3.94843	4.12657
2778263982	5.76954	5.77039
2778263983	3.3371	2.75103
2778263984	2.5759	2.9039
2778263985	2.55175	2.91625
2778263986	1.61446	1.9083
2778263987	2.28922	2.53501
2778263988	2.70642	2.97362
2778263989	3.45729	3.41335
2778263990	4.37302	4.9114
2778263991	4.04562	5.1923
2778263992	5.28923	5.61997
2778263993	15.3743	6.45887
2778263994	16.4506	16.6547
2778263995	28.783	11.3661
2778263996	38.7516	38.3602
2778263997	31.9038	32.766
2778263998	16.9484	19.4066
2778263999	20.1435	21.4742
2778264000	16.3377	14.6516
2778264001	18.5401	19.7617
2778264002	15.5383	15.2692
2778264003	2.97851	3.23693
2778264004	5.71871	6.28782
2778264005	6.23945	6.88394
2778264006	4.72269	5.01257
2778264007	12.6337	12.2725
2778264008	7.12708	6.87357
2778264009	21.8914	23.3906
2778264010	30.6539	32.5965
2778264011	45.8378	19.4245
2778264012	60.3866	63.5024
2778264013	86.2939	90.0168
2778264014	175.548	188.56
2778264015	384.497	427.169
2778264016	532.057	540.321
2778264017	58.7895	5.24378
2778264018	11.4658	12.7283
2778264019	18.8306	20.4224
2778264020	26.3638	28.2322
2778264021	31.8034	34.0128
2778264022	52.5684	55.3487
2778264023	132.058	142.977
2778264024	239.127	272.844
2778264025	10.2217	11.0723
2778264026	21.9358	21.6101
2778264027	45.9675	49.5449
2778264028	45.7186	44.1954
2778264029	103.751	0
2778264030	39.1517	39.4981
2778264031	82.5293	0
2778264032	7.65011	8.25506
2778264033	12.7561	12.9159
2778264034	41.3534	42.9295
2778264035	87.7461	86.4731
2778264036	24.5956	24.6376
2778264037	18.1931	18.4145
2778264038	33.6814	35.3667
2778264039	14.6349	15.2152
2778264040	27.1593	30.9266
2778264041	1.64255	1.86059
2778264042	7.82958	7.82679
2778264043	9.07197	10.0699
2778264044	6.7226	7.06343
2778264045	7.99464	7.89418
2778264046	46.8262	0
2778264047	30.877	0
2778264048	8.12186	8.37044
2778264049	2.6207	2.58195
2778264050	3.80412	4.85277
2778264051	5.13138	5.19233
2778264052	5.40773	5.94612
2778264053	7.3902	8.55633
2778264054	6.8865	7.52758
2778264055	5.37307	5.92571
2778264056	4.49893	4.58696
2778264057	5.79904	5.41356
2778264058	3.69981	4.13112
2778264059	1.77956	1.73853
2778264060	20.9244	5.14498
2778264061	75.8491	0
2778264062	54.4246	0
2778264063	7.503	7.54859
2778264064	15.2255	16.3958
2778264065	11.5937	12.7579
2778264066	11.275	10.9698
2778264067	17.1541	18.1505
2778264068	20.3151	21.5935
2778264069	1.10077	1.15189
2778264070	0.420226	0.669765
2778264071	2.04633	0
2778264072	3.29761	3.18833
2778264073	3.20781	2.92865
2778264074	8.87661	9.96839
2778264075	12.7211	9.70005
2778264076	12.7951	13.5798
2778264077	10.0027	10.8277
2778264078	9.36525	0
2778264079	14.496	15.2358
2778264080	27.3475	0
2778264081	20.0897	21.4007
2778264082	48.0737	50.5117
2778264083	120.316	36.0149
2778264084	3.703	3.92336
2778264085	4.20204	4.43286
2778264086	4.53651	5.81927
2778264087	4.15467	4.62873
2778264088	4.01019	3.88924
2778264089	7.25404	7.99788
2778264090	17.6447	18.4209
2778264091	68.2992	68.4117
2778264092	624.304	650.497
2778264093	295.459	372.163
2778264094	11.1758	13.1396
2778264095	27.4635	30.9048
2778264096	35.973	39.0653
2778264097	19.1152	21.7111
2778264098	8.36691	9.41374
2778264099	7.07821	7.2288
2778264100	5.68362	5.79579
2778264101	13.5577	15.5328
2778264102	4.84103	5.14809
2778264103	5.48214	5.63443
2778264104	7.35467	7.9005
2778264105	3.60296	3.87561
2778264106	3.06252	3.15032
2778264107	3.04492	2.93275
2778264108	4.87606	4.74433
2778264109	6.03959	6.17749
2778264110	6.55473	6.97065
2778264111	1.02104	1.11273
2778264112	2.52808	2.45548
2778264113	7.50073	8.78512
2778264114	6.31371	6.91707
2778264115	4.69121	4.83515
2778264116	7.66308	8.18382
2778264117	1.15124	1.20267
2778264118	1.53151	1.61264
2778264119	0.376776	0.35802
2778264120	1.34279	1.69605
2778264121	2.71465	1.80091
2778264122	2.07668	2.30316
2778264123	1.32406	1.25635
2778264124	0.830444	0.980553
2778264125	2.10457	1.86948
2778264126	3.51121	4.06485
2778264127	1.54083	1.33953
2778264128	2.467	2.60417
2778264129	12.7145	14.9897
2778264130	5.11512	5.13713
2778264131	8.44796	8.7096
2778264132	17.5741	18.3318
2778264133	3.12287	4.13199
2778264134	1.9201	2.7361
2778264135	3.47763	4.35866
2778264136	6.47629	6.76423
2778264137	5.25394	5.48498
2778264138	0.234638	0.281665
2778264139	0.500895	0.542301
2778264140	2.1034	2.10859
2778264141	4.52308	4.66186
2778264142	5.91196	7.50112
2778264143	3.63302	3.75066
2778264144	1.63501	1.66374
2778264145	1.01694	1.12602
2778264146	0.730331	0.763377
2778264147	1.15385	1.32759
2778264148	0	0
2778264149	1.03662	1.26077
2778264150	0.74379	0.762806
2778264151	0.209597	0.0893015
2778264152	0.67228	0.697065
2778264153	0.977106	1.11446
2778264154	0.366115	0.456556
2778264155	0.749568	1.09455
2778264156	0.239331	0
2778264157	0.776395	0.890531
2778264158	0.906239	1.42232
2778264159	1.25623	1.32847
2778264160	0.259817	0.303981
2778264161	1.47609	2.05967
2778264162	0.654478	0.719271
2778264163	0.239331	0
2778264164	0.493877	0.56864
2778264165	0.341411	0.350812
2778264166	0.436026	0.468814
2778264167	0.97064	1.00379
2778264168	0.430964	0.695523
2778264169	1.16862	1.01595
2778264170	0.926656	0.205463
2778264171	0.340263	0.41934
2778264172	0	0
2778264173	1.48721	1.71037
2778264174	0.234896	0.307566
2778264175	0.312909	0.732673
[truncated: 7,849 more rows]

## Sheet: g
16S rRNA Gene Copies per µl Template	CT (Species A 16S plasmid + Bacteria probe)	16S rRNA Gene Copies per µl Template	CT (Species B 16S plasmid + Bacteria probe)
100000000	9.96274	100000000	10.1166
10000000	14.1871	10000000	13.8052
1000000	17.4763	1000000	17.3409
100000	20.7888	100000	20.7176
10000	23.2003	10000	22.8574
100000000	10.1427	100000000	10.0036
10000000	14.1353	10000000	14.048
1000000	17.5048	1000000	17.4574
100000	20.8187	100000	20.8227
10000	23.2307	10000	23.0448
100000000	10.0024	100000000	9.98098
10000000	14.1159	10000000	13.9512
1000000	17.3478	1000000	17.3874
100000	20.7446	100000	20.7854
10000	23.1676	10000	22.8767

## Sheet: h
16S rRNA Gene Copies per µl Template	CT (Species A 16S plasmid + Species A probe)	16S rRNA Gene Copies per µl Template	CT (Species B 16S plasmid + Species B probe)
10000000	13.4387	10000000	12.6527
1000000	16.8521	1000000	16.3149
100000	20.275	100000	19.8621
10000	24.0591	10000	23.0345
10000000	13.3849	1000	26.7245
1000000	16.9895	10000000	13.0115
100000	20.3031	1000000	16.4091
10000	24.0743	100000	19.9165
10000000	13.3888	10000	23.1943
1000000	16.7197	1000	26.7966
100000	20.2603	10000000	12.9039
10000	24.0264	1000000	16.3479
		100000	19.9069
		10000	23.0526
		1000	26.8039

## Sheet: i
Gene Copies of Species A (%): Expected	Gene Copies of Species A (%): Observed
0	0
10	8.6822
20	20.0837
30	30.8774
40	41.9533
50	51.3744
60	58.7761
70	73.3934
80	81.7409
90	90.3078
100	111.774
0	0
10	7.7893
20	18.9998
30	30.1176
40	39.624
50	46.9361
60	60.8774
70	69.8988
80	78.524
90	86.3669
100	94.5932
0	0
10	8.55068
20	17.9831
30	29.5303
40	39.8402
50	52.4348
60	63.2717
70	71.6237
80	79.2612
90	92.9313
100	98.955
0	0
10	7.98226
20	19.1319
30	31.2903
40	40.6223
50	49.5119
60	59.3212
70	65.8112
80	80.3539
90	92.7413
100	102.607

## Sheet: j
Gene Copies of Species B (%): Observed	Gene Copies of Species B (%): Expected
100	100.914
90	95.4526
80	84.8285
70	69.1046
60	59.7838
50	48.8155
40	36.7628
30	31.5127
20	19.0355
10	9.8938
0	0
100	94.7631
90	88.0683
80	76.1476
70	66.5186
60	57.2467
50	48.6999
40	39.2099
30	30.8802
20	19.9187
10	9.46478
0	0
100	101.985
90	95.2548
80	78.2293
70	70.7875
60	58.1691
50	50.3566
40	40.977
30	31.5854
20	19.4588
10	9.70854
0	0
100	102.951
90	88.7938
80	84.657
70	71.7381
60	60.384
50	50.8407
40	38.8376
30	28.3723
20	20.0894
10	9.37457
0	0
